# Supplementary material for: A Deeper Examination of Thorellius atrox Scorpion Venom Components with Omic Techonologies
Source: MDPI journal article supplement (doi:10.3390/toxins9120399), 2017-12-12
Supplement: s1 [file s1]

**Table S2.** Sequences identified with the Proteome Discoverer software. Transcriptome ID corresponds to the identifier of the transcript. Fragments with a good Xcorr value (above 1) are highlighted in green in the corresponding protein/peptide.

| Transcriptome ID  | Transcript-derived mature aa sequence                                                                                                                                                                                                  | Peptide fragments       | Xcorr |
|-------------------|----------------------------------------------------------------------------------------------------------------------------------------------------------------------------------------------------------------------------------------|-------------------------|-------|
| comp8310_c0_seq1  | DQDTSTADRDKRAPQMYSFGLGKKSYD<br>LPLEDSDRDKRAPQLYNFGLGK <b>KSYDLP</b><br><b>LDDSTAPDDYMIGEPGVK</b> KDQRFSGLG                                                                                                                             | KSYDLPDDSTAPDDYMIGEPGVK | 4.34  |
|                   | KRQDHRFAFGLGKRDPSSGRYSFGLGKRE<br>PNRFAFGLGKREPSRFAFGLGKRQITEDF<br>DDYMKRRFSFGLGKRSDNRFSGFLGKRP<br>ENRFSFGLGKRPDNRFSGFLGRRKRFSDD<br>SDSYSEEDYNLSQ                                                                                       |                         |       |
| comp32030_c1_seq1 | RWDLFNGTINVDDMNSKWWEYRLKYQ<br>GNCPSVKRTEK <b>DLDPASLYHVPADISYA</b>                                                                                                                                                                     | DLDPASLYHVPADISYAR      | 4.67  |
|                   | <b>R</b> YFTALILQFQHKALCDAAGHSGPLHK<br>CDIYGSSEAGERLK <b>AMMSLGISKWPPEA</b><br><b>LK</b> ILTNGEVDDLDVAPMLEYFQPLQEWL<br>EKENKDEVIGWNSDDATICP                                                                                            | AMMSLGISKWPPEALK        | 4.1   |
| comp32030_c2_seq1 | IYQVLEEKIFAMQAGVVCFLLLSSVSISYS<br>AKFCNGGSCEEEQGIRLLEHYNAGEEDI<br>CSRHTLSIWYYVNITDENQERESK <b>LQEE</b><br><b>YDKFITDIVK</b> EASQCGWSSFSDPMIRRF<br>KFLVEKSSKQLSPEESKQEETLKYQMQG<br>LFGTAKVCPYDSNGTEKDNCTMTLDDGI<br>QQILESSTNFDELLYYWKAW | LQEEYDKFITDIVK          | 4.91  |
| comp33161_c0_seq1 | MCRFREASKQTSTSSSRMTTFLTLVLVE<br>LFLNYEIHVLSSLISDEGKAEEFLDDVDQ<br>QHREWCLDNTKELDYR <b>QIWSFDWQHFS</b><br><b>NPEL</b> RAFKLLSRTEPASMNEPNQDDKS                                                                                            | TADLSAWTESYLR           | 3.87  |
|                   | KYEELEETLISGILGGSVCYPDQMCSKKL                                                                                                                                                                                                          | SIGTPELDAAFWR           | 3.46  |
|                   | KYSGINREVDPSIDYQKRLYYWKEWRD                                                                                                                                                                                                            | YNGPIPEHLIGLIPQK        | 3.16  |
|                   | ATGKSLKSTYSDFVDIANKINNGYESYG<br>DYWLREYDVSADEFLQELETLSQQLPL                                                                                                                                                                            | ATSNLHYPFQGAANPGFLVAIGR | 5.48  |
|                   | YQQLHAYVRRRLIDVYGEDKIK <b>YNGPIP</b><br><b>EHLIGLIPQK</b> WKNIMK <b>IINPFENDFDVSIK</b>                                                                                                                                                 | IINPFENDFDVSIK          | 4.26  |
|                   | MKQKGMTVSEMVDLAEEFYK <b>SIGTPELD</b><br><b>AAFWR</b> DSVFEKSPQMESCNEIREGCAG                                                                                                                                                            | SVGLFDESYGDDRDISVLLR    | 3.84  |
|                   | NGARIRMCTNATEYYLHLLQLLGDAH<br>QEK <b>ATSNLHYPFQGAANPGFLVAIGRTA</b><br><b>DLSAWTESYLR</b> SVGLFDESYGDDRDISV<br><b>LLRIALENIPIIFSSLSMEK</b> WRLDVFDKITP                                                                                  | QIWSFDWQHFSNPELR        | 3.99  |
|                   | FSSMNSKYWEKRVKKEGLCPPVRRTEN                                                                                                                                                                                                            | SKPWPEVLSLLTSGR         | 3.13  |
|                   | DFDPGAHIHISTHSPVIEYFVGGILQFQFH<br>KALSEAAGCSDPLHKCSIYQSSAAGRIFN                                                                                                                                                                        | IALENIPIIFSSLSmEK       | 4.8   |
|                   | EVMEELGK <b>SKPWPEVLSLLTSGR</b> TNSLDT<br>GALLEYFRPLYEWLQQQNELEYIGWVA<br>DDSLQC                                                                                                                                                        | YnGPIPEHLIGLIPQK        | 3.9   |
|                   |                                                                                                                                                                                                                                        |                         |       |
|                   |                                                                                                                                                                                                                                        |                         |       |
|                   |                                                                                                                                                                                                                                        |                         |       |
|                   |                                                                                                                                                                                                                                        |                         |       |
|                   |                                                                                                                                                                                                                                        |                         |       |

|                   |                                                                                                                                                                                                                                                                                                                                                                                                                                                                                                                                                                                                                                                                                                                                                                                     |                  |      |
|-------------------|-------------------------------------------------------------------------------------------------------------------------------------------------------------------------------------------------------------------------------------------------------------------------------------------------------------------------------------------------------------------------------------------------------------------------------------------------------------------------------------------------------------------------------------------------------------------------------------------------------------------------------------------------------------------------------------------------------------------------------------------------------------------------------------|------------------|------|
| comp33725_c0_seq1 | FLDHLVSWNVIIHQVINLLYMTIPLEFSV<br>HFGYPSIRRMRSILFHSVVLIFSFFIRHNLS<br>TLITDEKEAWELLAEDEKMYNNCLKGE<br>YSLSDTTIDTVAWQNFTDPLVKRAFELN<br>AQKHYYVGSTLRISNTSDGQRRGEIWNE<br>KRNILSNTKVCTYETKMDMGNCTMERIF<br>DILRNYDKSENNDERKYYWVAWHNAIG<br>KMRGIYDEDLQILKRLNLPDYNDWWL<br>YFYEEPTSHIREEMERVMQEILPLHKELH<br>AYIRRRRLINQYSGSVITSBGPIPSQLLGLW<br>EYNGWRITFVPYPEKALNITEKLKEKNIT<br>PVGMLKLAEDFYHSLGLPYIDAEFWDNI<br>DLSTKELCYYNFRYTCKPIISGASGCMPI<br>AGSLHKLIGAAIDHWLKLRLQTEMWPNV<br>LIDVPPNPAFRMAFRHALELPTWTVDYLS<br>QIGLIEHIPMDSDEVTEFDINQLMEVAIRF<br>FTLLPSLLQTAKWKWDSLDFVLSNDNYN<br>RRWWEYSKYQGVCPPVRRTEENFDPA<br>SSMHLANGLQLVRDFIGVIYGFQFYEA<br>CKEAGHTDLLHRCNLYGARTFGDKIREV<br>YTLGKSINGSQGIAIMTNGESDKMDTKPL<br>LEYFRPLYEWLKNENEGETVGWKSDDP<br>MICP                                          | LIGAAIDHWLK      | 3.23 |
|                   | TEENFDPASSMHLANGLQLVR                                                                                                                                                                                                                                                                                                                                                                                                                                                                                                                                                                                                                                                                                                                                                               | 4.17             |      |
|                   | FFTLPSLLQTAK                                                                                                                                                                                                                                                                                                                                                                                                                                                                                                                                                                                                                                                                                                                                                                        | 3.39             |      |
|                   |                                                                                                                                                                                                                                                                                                                                                                                                                                                                                                                                                                                                                                                                                                                                                                                     |                  |      |
|                   |                                                                                                                                                                                                                                                                                                                                                                                                                                                                                                                                                                                                                                                                                                                                                                                     |                  |      |
|                   |                                                                                                                                                                                                                                                                                                                                                                                                                                                                                                                                                                                                                                                                                                                                                                                     |                  |      |
|                   |                                                                                                                                                                                                                                                                                                                                                                                                                                                                                                                                                                                                                                                                                                                                                                                     |                  |      |
|                   |                                                                                                                                                                                                                                                                                                                                                                                                                                                                                                                                                                                                                                                                                                                                                                                     |                  |      |
|                   |                                                                                                                                                                                                                                                                                                                                                                                                                                                                                                                                                                                                                                                                                                                                                                                     |                  |      |
|                   |                                                                                                                                                                                                                                                                                                                                                                                                                                                                                                                                                                                                                                                                                                                                                                                     |                  |      |
| comp33936_c0_seq1 | NTGSRRLOKSHAYSGVRYILLESFITTDY<br>TKQLLNLRVSKPSSEGGRFVMQAEVIW<br>SFFLCSFSFSVYCNAISHEEEEGIQLLERY<br>NSRRLDVCRRRSLVIWNSYVDSSQRNPT<br>MASKLSEESNNLTTEFVKKASQYDWTSE<br>SDPLIRROQFKFLVEKLSKQLSPEESEKEET<br>LRRQMGRFTFRVATVCPYGINATEKQNC<br>MTLDNGIESIIGSSTNFDELLYYWKA<br>DETGGKMRDLYAKFIPLANKEAVINGFP<br>DHGAQWRSVYEVDNLSNRVDELFNQVL<br>PLYKQLHAYVRNKLIGIYGEDHICTDGPI<br>PAHLLGHMMGESWANLENLTRYPNKP<br>LVDITPVMQERNMTMLDIVKISEDFFESL<br>GLPPMTNEFWNHSIFERIPGRKMSCHPISF<br>DLCNGEDFRILMCGRVDMNSLKIVHHE<br>MGHIHYMQYVHQPHLFRKGANEGFHE<br>AIGDTIALSVFTPTHWKALGFIQNETDDE<br>EQDINALFSTAMDKLPLPHAYVVDWRWR<br>WDLFNGTINVSNMNSEWWEYRLKYQG<br>NCPSIRRTENDLDPASLYHVPVDSSYVRY<br>FVALILQFQFHKALCNAAGYTGPLHKCD<br>IYGSHEAGERLKAMMSLGISKPWPEALK<br>VLTNGEVDDLVDVSPLEEFQPLQEWLEN<br>ENKDEVIGWSSDDATICP | AMMSLGISKPWPEALK | 4.1  |
|                   | ASQYDWTSESDPLIR                                                                                                                                                                                                                                                                                                                                                                                                                                                                                                                                                                                                                                                                                                                                                                     | 4.08             |      |
|                   | VDELfNQLPLYK                                                                                                                                                                                                                                                                                                                                                                                                                                                                                                                                                                                                                                                                                                                                                                        | 4.36             |      |
|                   | KGANEGFHEAIGDTIALSVFTPTHWK                                                                                                                                                                                                                                                                                                                                                                                                                                                                                                                                                                                                                                                                                                                                                          | 5.67             |      |
|                   | GANEGFHEAIGDTIALSVFTPTHWK                                                                                                                                                                                                                                                                                                                                                                                                                                                                                                                                                                                                                                                                                                                                                           | 7.32             |      |
|                   | SVYEVDNLSNRVDELFNQVLPLYK                                                                                                                                                                                                                                                                                                                                                                                                                                                                                                                                                                                                                                                                                                                                                            | 5.37             |      |
|                   |                                                                                                                                                                                                                                                                                                                                                                                                                                                                                                                                                                                                                                                                                                                                                                                     |                  |      |
|                   |                                                                                                                                                                                                                                                                                                                                                                                                                                                                                                                                                                                                                                                                                                                                                                                     |                  |      |
|                   |                                                                                                                                                                                                                                                                                                                                                                                                                                                                                                                                                                                                                                                                                                                                                                                     |                  |      |
|                   |                                                                                                                                                                                                                                                                                                                                                                                                                                                                                                                                                                                                                                                                                                                                                                                     |                  |      |
| TatCaTClc01       | ADCLAHLKLCKKNKDCCSKKCSRRGTN<br>PEQRCR                                                                                                                                                                                                                                                                                                                                                                                                                                                                                                                                                                                                                                                                                                                                               | ADcLAHLK         | 2.19 |
| comp32319_c0_seq1 | MRSMDVKILAGIFLVLGISDVITVSLAYK<br>LTGWKIPFYGIILDAGSSKTQVTLYKWE<br>AHKDKGTGIVEQVDTCKVKGGLHNRNS<br>TIHAGEELLPCMLKISASIEGQQENTPLY<br>LGATAGMRLRLGNPLLAAGIILEVKYSL<br>LRNTNFLIRDVRILNGRDEGIFAWVTGNY                                                                                                                                                                                                                                                                                                                                                                                                                                                                                                                                                                                      | LGNPLLAAGIILEVK  | 4.36 |

|                   |                                                                                                                                                                                                                                                                                                                         |                                 |      |
|-------------------|-------------------------------------------------------------------------------------------------------------------------------------------------------------------------------------------------------------------------------------------------------------------------------------------------------------------------|---------------------------------|------|
|                   | LLDTLHDGVNDHDPATYGALDMGGAS<br>TQISFELPPRKIAKIDNATTVNMTLFGQN<br>YLVFGESYLCFGINEAMRRHRARLTIGK<br>DPEGEITDPCGFKDDIVEYSVKDLFGHQ<br>TRSLTPTLNKDGVIKFRGTGDSKLSIEV<br>EKLTDQEECKVFKKPCFAEPKEKLSNV<br>KYMAVSTFYFTASALNITNTSLQNYKNA<br>IDYYCGLSKDEAHRRLKPEESQYVRDYC<br>LEAHYVHHILTK EYGF DENTWQNIMFV<br>MKVR GSDLGWSLGYMINATNTIP | EYGF DENTWQNIMFVMKVR            | 1.4  |
| comp881_c0_seq1   | YPASLLEDEDEYENS RVFRGRFAK QGEL<br>P WMIQLQVSK GNGKAGMCGGSIISKRHV                                                                                                                                                                                                                                                        | TPLTNYDNNIQNIcLPK               | 5.71 |
|                   | LTAAHCVCSNATTKAYANVNDITGRIGH<br>INRADATPVKFK RL VVHPGYDADYNADI<br>ALIEFK TPLTNYDNNIQNICLPK KGKSY                                                                                                                                                                                                                        | RLVVHPGYDADYNADIALIEFK          | 7.22 |
|                   | NRQPV LQMGWGRFDNGSVGTSPTLKITN<br>VG TILDR TTCIREMRSYAEPGQLCISNAG                                                                                                                                                                                                                                                        | QGELP WMIQLQVSK                 | 4.69 |
|                   | GEKICGGDSGGPLVLVNGV NKMAIGIVS<br>FDYFDWCVEDTEGPAIYTDASYA EWIK                                                                                                                                                                                                                                                           | LVVHPGYDADYNADIALIEFK           | 6.64 |
|                   | TNTNDNGICWKD                                                                                                                                                                                                                                                                                                            |                                 |      |
| TatHDPND201       | GIWSTIKK YASK A WNSDIGK SLRNKAAG                                                                                                                                                                                                                                                                                        | AWNSDIGK                        | 3.03 |
|                   | AINKFVADKIGVTPSQAASMTLDQIVDA                                                                                                                                                                                                                                                                                            | GIWSTIK                         | 2.65 |
|                   | MY YD                                                                                                                                                                                                                                                                                                                   | GIWSTIKK                        | 2.02 |
| TatHDPND301       | LPFFLLSLVPTAISAIKKL                                                                                                                                                                                                                                                                                                     | LPFFLLSLVPTAISAIKK              | 5.94 |
| ViVlp1            | GIFSWVKKA WNSGVGK SLRKQAVKAAK                                                                                                                                                                                                                                                                                           | KAWNSGVGK                       | 3.27 |
|                   | NYVANKLGGTPEEAGAMPFDEFMDVLH                                                                                                                                                                                                                                                                                             | GIFSWVK                         | 2.5  |
|                   | YN                                                                                                                                                                                                                                                                                                                      | AWNSGVGK                        | 2.1  |
| ViAMP1            | FWGFLGK LAMK AIPSLIGGNK                                                                                                                                                                                                                                                                                                 | AIPSLIGGNK                      | 3.01 |
|                   |                                                                                                                                                                                                                                                                                                                         | FWGFLGK                         | 2.79 |
| TatHDPND401       | FLK GIIDTVGK WL                                                                                                                                                                                                                                                                                                         | GIIDTVGK                        | 2.31 |
| TatHDPND403       | FWNTLLSVGK SLL                                                                                                                                                                                                                                                                                                          | FWNTLLSVGK                      |      |
| ViCT2             | FWGAVWNAAKSIL                                                                                                                                                                                                                                                                                                           | FWGAVWNAAK                      | 2.06 |
| TatEnzHya01       | NFEVFWNVPSLLCSIKFGVNLTQTLLKY                                                                                                                                                                                                                                                                                            | WcYYLFPDcYNYFGK                 | 4.84 |
|                   | K ILVNNGESFIGDKIALIYENGIGKYPHID<br>PK KGDINGGIPQLDKLNEHLKLAENDIQK                                                                                                                                                                                                                                                       | ILVNNGESFIGDKIALIYENGIGKYPHIDPK | 4.26 |
|                   | LIPNPDFNGLGIIDWEAWRPIWEYHWGS                                                                                                                                                                                                                                                                                            | IYPYINYMVHVS                    | 4.22 |
|                   | LGIYKNRTLEMVKKDHPTWSEQLVQSTA                                                                                                                                                                                                                                                                                            | cTWPNDPFTSWK                    | 3.38 |
|                   | KNIWENSAKQWMLKTLELAKKL RPHGR                                                                                                                                                                                                                                                                                            |                                 |      |
|                   | WCYYLFPDCYNYFGK DQPSQFFCSAMIQ                                                                                                                                                                                                                                                                                           |                                 |      |
|                   | NNNDRLSWMWDASTALCPSIYFIENQM                                                                                                                                                                                                                                                                                             |                                 |      |
|                   | KYNGSQR TWFLYGKLA EAVRVARPHTR<br>YPYINYMVHVS R IPVPE DHFWKMLS LIA                                                                                                                                                                                                                                                       | YLT DINSDFDSK                   | 2.29 |
|                   | LGLDGAHWGSSSYLS DITSCQDLETYVN                                                                                                                                                                                                                                                                                           |                                 |      |
|                   | NVIGPAVTTVSSNVERCSQMCN GRGKC<br>TWPNDPFTSWK YLT DINSDFDSK EITCRC<br>QTHKG RYCD                                                                                                                                                                                                                                          |                                 |      |
| comp15335_c0_seq1 | LQTVSSTEMKSIILAVVVVAVASQQLGE<br>DPLCRAPESVVNRYIECMRSNYKPAFDY<br>ALTCSR ELGAGALADFIK FSCGKL RATKE<br>QETKYGNCLTRAIDPSNALSEEDLSKVVE<br>SCRQQALASQ                                                                                                                                                                         | ELGAGALADFIK                    | 3.27 |
| comp30560_c0_seq1 | NMNVINVTFTFVVVFTSPYLHIHVFAE<br>NLSVDHWEFVCSSEETILGLLDCSMPEE<br>TKDSLKRINGLMECTK MPQIEIIQSLCK ID<br>SLPEAKVN LIDSCLEKHFADVDESQPNPV                                                                                                                                                                                       | MPQIEIIQSLcK                    | 4.02 |

|                   |                                               |                                   |      |
|-------------------|-----------------------------------------------|-----------------------------------|------|
|                   | VKCIEQKPEFHSMRAEK                             |                                   |      |
| comp31101_c0_seq1 | EQELRINLYRRMLTCITIGSFILITSVTSIQ               |                                   |      |
|                   | CCHHTTTLNNTDVENTNTTSDAFQDSCIL                 | TIDTIPLPDDPGSTSLK                 | 3.44 |
|                   | ADPNDYVDDLISKLNK <b>TIDTIPLPDDPG</b>          |                                   |      |
|                   | <b>STSLK</b> EGQLWGLSSLKRVGNATIIYCNET         | TFSGQVFNADTADILFR                 | 6.03 |
|                   | LTSVEVLISFEELRGRYNWERKVLLK <b>TFS</b>         |                                   |      |
|                   | <b>GQVFNADTADILFR</b> VSQEHANSTGIVLE          |                                   |      |
|                   | ELSIKNLSGIHTKVTGLGVVTW AISVITDP               | TLSTAVEGPLKDAIGLALR               | 5.01 |
|                   | VANLFKK <b>TLSTAVEGPLKDAIGLALR</b> DL         |                                   |      |
|                   | DVPLY                                         |                                   |      |
|                   | VLTSSTMSRQEFVIVFLALYCISSFSVIKV                |                                   |      |
|                   | SATSSIIYAPLVKVSYYETLCPDSRDYIT                 |                                   |      |
|                   | KQVWPTYQKVSDIMELELIPFGIATETPL                 |                                   |      |
| comp30730_c0_seq1 | NSTHYIYTCHHGKDECYGNAVHTCAIHL                  | ATDNLLSVVcTLYK                    | 4.28 |
|                   | LRNMSLALNLCMEMKPDHMQGRKCA                     |                                   |      |
|                   | TDLEINYLSIEACANARLGNELQHEMAT                  |                                   |      |
|                   | KTKNLNPPMDFVPWNVINGNSDSGMQK                   |                                   |      |
|                   | R <b>ATDNLLSVVCTLYK</b> GEKPKPCSSA            |                                   |      |
|                   | GLIRE <b>EKYFHQGV</b> DALTPLIPVPVVGGVV        | YFHQGV DALTPLIPVPVVGGVVNK         | 7.67 |
|                   | <b>NKVAK</b> QMIHKIGK <b>IQSLCAFNK</b> DMAGLC | EKYFHQGV DALTPLIPVPVVGGVVNK       | 6.73 |
|                   | EK <b>KCQETEKVK</b> GYCHGKCKCGKPLSY           | YFHQGV DALTPLIPVPVVGGVVNKVAK      | 4.51 |
| TatKTxScr02       | K                                             | IQSLcAFNK                         | 1.96 |
|                   |                                               | KcQETEKVK                         | 1.48 |
|                   | GLIKEKHVQK <b>GVDALTNLIPAPVVGGIIN</b>         | GVDALTNLIPAPVVGGIINK              | 5.76 |
|                   | <b>KVAKQ</b> VMVHKMGK <b>VQELCAFNKDVMG</b>    |                                   |      |
| TatKTxScr01       | <b>WCDK</b> ACLEKEQTNGFCHGKCKCGKPL            | VQELcAFNKDVMGWcDK                 | 3.94 |
|                   | SY                                            |                                   |      |
| ViLa1lp1          | VGEICQVGSMSINVGKKMQDPKSCVIYE                  |                                   |      |
|                   | CVEQNYRILLSKMSCSPQVPKRGCR <b>NVP</b>          | NVPGPVDAPFPDccPTSLcR              | 3.87 |
|                   | <b>GPVDAPFPDCCPTSLCR</b> GKQWDE               |                                   |      |
|                   | FGETCQAGGKYNVRVGQPIQDPNSCVLY                  | FAAAAPGTPFPNccPMVIcK              | 4.67 |
| TatOthLa101       | KCLNYNRR <b>YVLQTLSCATQTLK</b> SGCRFA         | YVLQTLScATQTLK                    | 5.89 |
|                   | <b>AAAPGTPFPNCCPMVICK</b> GSG                 |                                   |      |
|                   | MTTEEGKVVDVLDTEPF AEQKSGCGNGI                 |                                   |      |
|                   | TSSREKNLVIIAFVFGLLVLCLLCAIIMTV                | NKATIDAVLG VVEYNKDLR              | 5.96 |
|                   | VIGLLFPKREFCLTDHCVKKAGSILRIMD                 |                                   |      |
|                   | TTVDPCVDFFRFACGGWMDEYD VDENS                  |                                   |      |
|                   | ETAILGKMQLKIYRKLDKIIERVKSSLPTL                |                                   |      |
|                   | NLTDPKQIAEAGLKAIDSYDACNQLSTA                  |                                   |      |
|                   | YDPENIIPFMASFGGWPMVDDKWKEDP                   |                                   |      |
|                   | NMKIETKISSLISEFGVAPLFIITINPLEDDP              | ATIDAVLG VVEYNKDLR                | 4.9  |
|                   | TRNVLVIAPPSLSTSFVYLNASAIARKM                  |                                   |      |
|                   | KKVAEEDIDEDVKNVIKLRDEINKTLTAS                 |                                   |      |
|                   | IEDDSSELT VADLKLHLKNMDINWEKVF                 |                                   |      |
|                   | ASLLKSGKLA AEDTVKDLPVIVR <b>NKAT</b>          |                                   |      |
| comp34524_c0_seq1 | <b>IDAVLG VVEYNKDLR</b> ALSNYFAIEVLLN         |                                   |      |
|                   | HPLL VVNVTDGSSNNQAKALKNNNILT N                |                                   |      |
|                   | MKENCLATVSEYLN FAMDHV FVYNEPIS                | NKWPEIVSFSVSSVNAFYIPHQNNFVLPR     | 6.26 |
|                   | TGKAGEFIKYIREAFKQLIRKYDWIDDIT                 |                                   |      |
|                   | RRALLKKLEKMNNFIDHPPWIIDKEKLN                  |                                   |      |
|                   | AYYQDYTYTKGNPVATYFSMVAFGVHK                   |                                   |      |
|                   | SLETYNQISNR <b>NKWPEIVSFSVSSVNAFYI</b>        |                                   |      |
|                   | <b>PHQNNFVLPR</b> SILHPPIYDENNP NYLSFGS       | SILHPPIYDENNP NYLSFGSIGAVIGHEITHG | 5.72 |
|                   | <b>IGAVIGHEITHG</b> FDSEGRNYDEIGKVSSSL        | FDSEGR                            |      |
|                   | WTP TSTKEYNKLSQCFVTQYSNYSFGGN                 |                                   |      |
|                   |                                               |                                   |      |
|                   |                                               |                                   |      |

|                   |                                                                                                                                                                                  |                            |      |
|-------------------|----------------------------------------------------------------------------------------------------------------------------------------------------------------------------------|----------------------------|------|
|                   | VTVNGKTTLAENIADNGGLRQALRAYRL<br>WLKRNERELPLPGLAKYTPEQMFFISYG<br>QSWCISAGKKFLKKQVKTDEHTPNTYRV<br>IGTLSNMEEFAKEFQCKKATPMNPVNKC<br>VLW                                              |                            |      |
| TatEnzMtp04       | LKGCFTepQDAICGNEVVEKGEEDCGW<br>EEDCEEPCCFPMRSNPPRDEPPCHLRPNV<br>VCSPSQGPCCTHDCRIKVGEECRGDNGC<br>RSASYRDGQGPHCPSSSTNKPNTVCNDE<br>FVCYMGECTGSICMAYGLESCQCKRGLH<br>DPLTKACELCCKLPRD | LKGcFTepQDAIcGNEVVEK       | 1.61 |
| comp32637_c0_seq1 | FNLTLHTNDVHSRFEQFNTFGSRCTESS                                                                                                                                                     | LVFTDEIEcLK                | 3.08 |
|                   | AEKGECFGGVARQYTKLKELREKYPNSL                                                                                                                                                     | AEFPILcNLDVSR              | 4.33 |
|                   | FLSAGDYYQGTFMYTLHKWKIVADFMN                                                                                                                                                      | KVGIIGYTTPDTMFLSR          | 4.61 |
|                   | RLGHDVMAIGNHELDGVAAGLVPLIEKA                                                                                                                                                     | VGIIGYTTPDTmFLSR           | 4.56 |
|                   | EFPIICCNLDVSRSPSMKGKVSPFVIKEVD                                                                                                                                                   | AEKLVFTDEIEcLKDAVK         | 4.89 |
|                   | GRKVGIIGYTTPDTMFLSRAEKL VFTDEI                                                                                                                                                   | SLKGSVDIII ALGHSGFPK       | 5.2  |
|                   | ECLKDAVKS LKGSVDIII ALGHSGFPK D                                                                                                                                                  | VGIIGYTTPDTMFLSR           | 4.94 |
|                   | VEIAEAVEGV DIVVGGHTDTFLYSGDPPS                                                                                                                                                   | GSVDIII ALGHSGFPK          | 4.79 |
|                   | VEEPQGEYPTVVSHADG TKLVVQDYTF                                                                                                                                                     | LVFTDEIEcLKDAVK            | 4.63 |
|                   | GKYIGFLKVKFDDKGNVKS WEGNPILLD                                                                                                                                                    | EKYPNSLFLSAGDYYQGTFmYTLHK  | 7.05 |
|                   | NSVEQDPEILGALQPYVDAVSSIAKETVG                                                                                                                                                    | LGHdVmAIGNHELDGVAAGLVPLIEK | 7.12 |
|                   | NTKVLLRGDRTVCRMEECNLGNMLADA                                                                                                                                                      | QYGWTSAAISIWNSSGIR         | 5.6  |
|                   | LVDYFTDSPKQYGWTSAAISIWNSSGIRS                                                                                                                                                    | IVVPAYILGGGDGITVFKEK       | 4.78 |
|                   | SIDETA AEGNITVEDIMNVAPFSNTFSLAE                                                                                                                                                  | TLVVQDYTFGKYIGFLK          | 4.29 |
|                   | LRGEDLYTLMEESVSEYDASAIDPPGKLL                                                                                                                                                    | IVVPAYILGGGDGITVFK         | 5.39 |
|                   | QVSGLKVG YKMDQPPFHRVSELQVRCA                                                                                                                                                     | LGHdVMAIGNHELDGVAAGLVPLIEK | 7.05 |
|                   | KCRVPKYEKVDKKVVYRIVVPAYILGGG                                                                                                                                                     | AVTVFNTGVLDSDVIQTYLSR      | 5.81 |
|                   | DGITVFKEKAVTVFNTGVLDSDVIQTYLS                                                                                                                                                    | mEEcNLGNmLADALVDYFTDSPK    | 4.34 |
|                   | RHSSITTGVEGRIYFITPPAQSNSTSKRYIR                                                                                                                                                  |                            |      |
|                   | SFRFNK                                                                                                                                                                           |                            |      |
| comp26928_c1_seq1 | LLMMYALYLLLLFGFMHVAIKTKESFP<br>YHAAKVGRDCDFKIFPLKCNEQCWR EG<br>YNWGTCVGLLEGLCWHQKCCCFTKPIQ<br>ELEIDDDPYVDMTIQVEDPNVKTNPDERI<br>CQ                                                | EGYNWGTeVGLLEGLcWHQK       | 4.98 |
| comp27809_c1_seq1 | EQTMA YRCLHIVLLFLAVLGTVRTQLID                                                                                                                                                    | IVSTcEGcAPIILR             | 4.05 |
|                   | QCSAVKLTVDKDMYEVNERIVSTCEGCA<br>PIILRMRSAGEVKVRDRNFNVGMVKIK<br>QAYEATSDLEILCYSDRIGELKEMTLVKC<br>ASNNDLLCPFQGHNKNG                                                                | QAYEATSDLEILcYSDR          | 6.08 |
| comp30392_c0_seq1 | DESMEEGR TINLLFSEDGRR TLGCWFTY<br>AFSYNPTADIPTKTEGQK KLCECMQKAL<br>SGSN                                                                                                          | TLGcWFTYAFSYNPTADIPTKTEGQK | 6.77 |
| comp32982_c0_seq3 | ELKMLTASRRYCAKTCDKKSARHCAEDI<br>MPGFLGLYVKCVQSIRPEANTWDEINDV<br>YCSQVSQEEFLHQVMCFNLELNTRFKDG<br>NHGDVCLKCLDEAGC                                                                  | HcAEDIMPGFLGLYVK           | 4.95 |
| comp43100_c0_seq1 | MLNIHFHKLSVNINQCSAFIRCTLLFVSH<br>QRSVHIFAVMMLTYLSVVMCITMLSLSA<br>RSQR CVDGCPVPNGVIETALVGTGK SC<br>EDVTDATVRCGCTSTCEMKETFTGCTK<br>ACHCEDIDLFFDKNLLSCVSVNDCTH                      | cVDGcPEVPNGVIETALVGTGK     | 5.25 |
| comp31198_c0_seq1 | MESKQYFVISVYIMGFAELIISTNVYCPD<br>DQLCDCTPESIKCICLQRENIFFQKGETFM<br>GEKIIVKGCGEVK IATSFTK NLVVESFLIS                                                                              | NLVVESFLISDVLK             | 5.3  |

DVLK L HIAQYAFKGSSIRKLSIGNISDFTL  
 EPFSLSHIKNVSNLKINN VFLEHLPNFVT  
 WNTDAQNVAIMNSHVGA LAGAFKMEN  
 MESFLENN TVDDLSGSIEISNIKNFSFIR  
 NVVKNSGFYISLYMADKVEFAYCHFLQ  
 INSSMIYTHDIELFSFHDNHVESCEKKAF  
 WHVQANTKVTFVNNQIISANNDSLIPNFS  
 PKAIDLRIIESFNNTFVCD CNLEWLLNS  
 NPSYNFIKERSICYDPPYLANLKLSQLKLS  
 INNVGTCISVEKVS VSSAMPKITKLKYILE  
 TSKTSSNTEISTSPRSETLISKKDSALSPKT  
 EISTNQKTVASISPKAEAIHETDLSINPKSE  
 TLPSRKIVTPISPKTMT PASHSAHNEKRL  
 KQNLNSTSADMSTNIKSERPKSSKIMIPT  
 NSKADTSKESSKIDISRI PKSAVSTIQKSDI  
 SINPKMETPKQSKAEISAKFKRNAETSTE  
 TESSQTN TAVTQKTD PKADVSVTPETDS  
 KVQNSESSTTDKSITTEPKSSESSKENTPT  
 SLKEATPGNPKTDLLTPKSEISASTKPKT  
 TINSKAETATNSKTETTTSPKTETTTSSKT  
 ATTTSPKSQTVTSSKMETTNPKTETA

|                   |                                                                                                                                                                                                                                                                               |                          |      |
|-------------------|-------------------------------------------------------------------------------------------------------------------------------------------------------------------------------------------------------------------------------------------------------------------------------|--------------------------|------|
| TatEnzPA201       | TLRTFHGCQILQSLTDIAREVSILPKYAIR                                                                                                                                                                                                                                                | ALcANPTAEYTGESGFAK       | 5.74 |
|                   | RISKQELESFQSRCEHVGEER TIWGTKW                                                                                                                                                                                                                                                 | TIWGTK                   | 1.68 |
|                   | CGAGNESSGYEDLG YFYNVDSCCRHDH                                                                                                                                                                                                                                                  |                          |      |
|                   | HCDSIPSGGTKYSLKNEGKFTMMNCECE                                                                                                                                                                                                                                                  | VVEGTSWYDYLATLGLIK       | 6.67 |
|                   | DAFAK CLDKVVEGTSWYDYLATLGLIKS<br>FKGVYFNLYGNGCFHV KCNSGRSERRAL<br>CANPTAEYTGESGFAKLLNG                                                                                                                                                                                        | cLDKVVEGTSWYDYLATLGLIK   | 5.66 |
| TatEnzPA213       | AERELHVNFD PWPVARAAIVNF DYNSET<br>RREFSDCRMITSLDEITREGLDLPEHLIKR<br>VSKEEMDALEKRCSGSAEMERFGMIYPG<br>TKWCGPGNISSYS DLGELEADKCCRDH<br>DHCD SIPAGQTKYGLSNTGEYTL MNCDCE<br>EK AFDSCLGDAADKEYLWNSMR TKTLR<br>WTYFSAYSPK CYSVSCSAKRLDMEARC<br>ANGIGEWKSSYNV                         | WTYFSAYSPK               | 2.95 |
|                   |                                                                                                                                                                                                                                                                               | AFDS cLGDAADKEYLWNSMR    | 5.85 |
|                   |                                                                                                                                                                                                                                                                               |                          |      |
| TatEnzPA215       | MYLAVFTALLSLCCSRAAQRELYINFEPL<br>PGQRDSWPIARAAIVNFEEKSEMGREFSG<br>CRMISSVDELAREGTDLPEHLIKRASKEE<br>MDALQERCSGSAEMERFTMIYPGTKWC<br>GPGNKAKNESDLGSLEADKCCRAHDHC<br>DNIGAGK SKYGLTNTGSFTLLNCDCE NT<br>FDRCLSDAAEKEGWFKKQGTKALR WTY<br>FTAYSPKCYLSLSCNKKRSILEARCANPVG<br>KWKENYKL | YGLTNTGSFTLLNcDcENTFDR   | 7.49 |
|                   |                                                                                                                                                                                                                                                                               | WTYFTAYSPK               | 3.08 |
|                   |                                                                                                                                                                                                                                                                               | FTMIYPGTK                | 3.22 |
|                   |                                                                                                                                                                                                                                                                               | WKENYKL                  | 2.31 |
|                   |                                                                                                                                                                                                                                                                               | cLSDAAEKEGWFK            | 3.18 |
|                   |                                                                                                                                                                                                                                                                               | SKYGLTNTGSFTLLNcDcENTFDR | 7.98 |
|                   |                                                                                                                                                                                                                                                                               |                          |      |
| TatEnzPA202       | TFSKCRMLNSTKEAAREVSKFPQH LIKR<br>VSKEEMDNLERRCSGPLETRGFTDNFAF<br>KGTKWCGPGTMAENEDDLGPLEADKCC<br>RAHDHCD SIESGGFKYNLKNNAYRTLLN<br>CECEEA FDRCLQATADRVEGTEKEETKM<br>LR NYFFNILHVQCYRLYCRNGGPASENN<br>CTDKFGVWMENYYEENFERKDITFY                                                  | NYFFNILHVQcYR            | 5.16 |
|                   |                                                                                                                                                                                                                                                                               |                          |      |
|                   |                                                                                                                                                                                                                                                                               |                          |      |
| comp20627_c0_seq1 | IQIDKAYQVELIEGLNLFNASYRGVALVD<br>GYHHWSPA VLLRGELRRQLPIEVCR KA<br>SEILSKSNEFTLMATLRQEQRNAGTILSFS<br>EGNNRFLELQSSGRKHEIRLHYNHNNMV                                                                                                                                              | KASEILSK                 | 2.82 |



HVETFPYHLADNSWHQLSMTVSGNNVA  
LYVDCNRIYKRVINDIDRNFSTKNLSLWL  
GQRNYQHFFFKGILQDVRIVGKPHGYVL  
QCPHLETDCPTCGQFKQLQISVRGLENH  
VRDLIERLAHAEQRIAAVEECECKKHCLF  
NGTEHQDGSTWQNGCEICFCKLGNVVC  
KPIHCPHLECKLPVMKEDECCPQCPNQC  
LLDGIEYDHGDEFVARQCVICTCHDGSV  
QCRKIDPAEACPALPCPEEEQFTVPEECC  
RYCPGTDFCARGHNCHINATCLNLQTRH  
ACQCNMGYQGNVHCEDINECKTEGGH  
HGHHCRNLNTTCVNIPGSYICECLDGYYR  
MDRFSCIEHDECRSNDHNCDENAICANT  
AGSYTCHCKDGYRGDGFICDPICNETCL  
NGGQCVAPGLCGCHRGYTGPSCEIDIDE  
CSLGLHMCHPNAQCVNMPGWYYCECR  
RGYQSHYKNRLGIFCEDIDECSLESHTCH  
YSATCINEDGSFRCECGNSTSCSYNCIYY  
GEEKNNGETWTSPTDPCSHCSCYSGVVL  
CEQSSCDCSNSNVDLTCCPQCDETSICKH  
QETARLFRNGDKWTYQCQTCECLYGEID  
CWEIECPPVSCDNPVHHPGDCCLRCQEE  
PCLLDVKSNNNSLNIGCTYHGHMYRSG  
ETIPIVQDPCASCKCQVPHCEHSVSNTGY  
SSHRMDSSAARTVPFVWTILLSLLLTCPY  
NTIVRIWRMFLIINKLYPQKKMLRWKTQ  
LHYLYICFLPLLQCPLWRMGSYFNCFP  
CQRTSQLKIASKVNLAAGSLNTQKIPI

TatOthCRI06

MASVIITILVLWVTTIQSFEANDECDERY  
SSITQEHTMCKSINENCHFLRHGGKTYEQ  
QLLRTHNLIRNSIWKYVGKNYPLATNME  
IMQWDEL YEIAR **MHSLQCVEQPDCLC**  
**HQIGYFPVEQNFAVK** TYKKSEVANNGPV  
KRFQTVIKEWAAELKQYDPSIVNDFVT  
EELPTNWTNLRANTSFVGCASMNFYTD  
ETDVFTEVVVCNYGPAKLTTGEEIYKTG  
GKPCSDCEDDGICDEEFKNLCVPADLEL  
NITIVIEEEDTEIWLGEKNYNGTSLSEEIE  
GTTSPNEFTTAESAFTLYRQTGTPEETH  
TAIGEENS SVFTETAPEETSIVEFTTELS  
NEPVTTEVEESGERRRKRKVHPLISRLRY  
SNKRRKRHQEHS LFPMN

MHSLQcVEQPDcDLcHQIGYFPVEQNFAVK

4.59

TatOthCRI07

MNFLLLSCLVLFSCQAVFAQTCPALYLR  
FSKDHTYCRHSTCQTEKSGVSEKDKEIIV  
NMHNEFRSKIAMGKETTPMQPPAANM  
MQISWDEELA A VAQA HANGCKFDHDTA  
PQRQVENFNVGQNL YITMMSKRIDWRK  
AALWYTSEVKDFYPQYREPFVFGTYGHF  
SQVVAETWKVCGMAMY YDQSDNM  
DKVLYTCNYGPAGNMQGAAMYIKGQPC  
SQCPKNTKCSDEYEGLCKPITKDGPQNDI  
AKSSNDFIFYCEFSKNDPSECKVKVEGT  
KGFETRKIYSGIYKSVILNGGESITIKLGK  
AQDAGGICPFIYGSFGPNKDGD **MSAV**  
**SFGFSAPGIIFGDPIK** IEQGGS AFWTIGMH  
MQFDQEMESTIKLEAYPGATPQYFNKA

mSAVSFGFSAPGIIFGDPIK

5.75

|                   |                                                                                                                                                                                                                                                                                                                                                                                                                                                                                                                                                                                                                                                |              |      |
|-------------------|------------------------------------------------------------------------------------------------------------------------------------------------------------------------------------------------------------------------------------------------------------------------------------------------------------------------------------------------------------------------------------------------------------------------------------------------------------------------------------------------------------------------------------------------------------------------------------------------------------------------------------------------|--------------|------|
|                   | FGIGKGKCPKL                                                                                                                                                                                                                                                                                                                                                                                                                                                                                                                                                                                                                                    |              |      |
| comp30427_c0_seq1 | QPQPNFIIFIADDLGIGDVGCFGNNTIKTP<br>NIDNLASQGAILTHHLAAAAVCTPSRAA<br>LLTGRYPVRAGMEAGNRNQVLLFVASS<br>GGLPSNETTFAKILQGKGYSTGLIGKWH<br>LGNDCNEKGDMCHHPLHHGFDYYYGIP<br>LTNLKDFGTDGDSVITAYNPPLYTYFTT<br>AVVLLISLSLGLLSHGVIKSFSFVFFITSCA<br>MFVIFYVFVNFGRLLNSIILRNTEVVEQPV<br>RLNGLTQRLIQEGITFMKENSQKPFLLVM<br>SFIHVHTALFSAQEFSGKSRHGKYGDNV<br>EELDFAVGEIMTAAESFGHKENTFVYFTS<br>DNGGHLEERGIEGDVQGGYNGIYKGGK<br>GMGGMEEGIRVPTVVSWPVKIPAKLEV<br>AVPTSQMDLLPTVLEAAGIPLPNDRIIDG<br>KSIMLLLKGKRNISPHQYLFHYCGRSIHA<br>VRYIPNNGNSIWKVHYATPRWKPNTTEC<br>DFICHCFDDFVIHHNPLLYNILDDPSESH<br>PIDVRSNPKWLKLITINKAVKEHSRSIEH<br>VPQQFTFSNAVWKPWLQCCNFPWCHC<br>VDNRYPS | WLKLITInKAVK | 2.85 |
