# Supplementary material for: A Deeper Examination of Thorellius atrox Scorpion Venom Components with Omic Techonologies
Source: MDPI journal article supplement (doi:10.3390/toxins9120399), 2017-12-12
Supplement: s1 [file s1]

**Table S3.** Sequences identified *de novo* in the proteome of *T. atrox* using Peaks Studio software.

| #  | Peptide                                    | ALC (%) | Length | m/z    | z | Mass (Da) |
|----|--------------------------------------------|---------|--------|--------|---|-----------|
| 1  | LKEEYDKFLTDLVK                             | 97      | 14     | 871.0  | 2 | 1739.9    |
| 2  | AFDSC(+57.02)LGDAASKEDFLNSMK               | 97      | 20     | 1103.5 | 2 | 2205.0    |
| 3  | MPQLELLQSLC(+57.02)K                       | 96      | 12     | 730.4  | 2 | 1458.8    |
| 4  | LSEDM(+15.99)FESLGLPR                      | 96      | 13     | 755.4  | 2 | 1508.7    |
| 5  | TPLTNYDNNLQNLC(+57.02)LPK                  | 96      | 17     | 1009.5 | 2 | 2017.0    |
| 6  | LSEDM(+15.99)FESLGLPR                      | 96      | 13     | 755.4  | 2 | 1508.7    |
| 7  | NYYM(+15.99)NLLHVQC(+57.02)YR              | 96      | 13     | 895.4  | 2 | 1788.8    |
| 8  | KQSDAAEKEGWFK                              | 96      | 13     | 762.3  | 2 | 1522.7    |
| 9  | AFDSC(+57.02)LGDAADKEYLWNSMR               | 96      | 20     | 1175.0 | 2 | 2348.0    |
| 10 | HGC(+57.02)LADFDVGGGC(+57.02)EKHC(+57.02)R | 95      | 18     | 692.3  | 3 | 2073.9    |
| 11 | KGELPWMLQLQVSK                             | 95      | 14     | 828.9  | 2 | 1655.9    |
| 12 | NYYM(+15.99)NLLHVQC(+57.02)YR              | 95      | 13     | 895.4  | 2 | 1788.8    |
| 13 | MPQLELLKSLC(+57.02)K                       | 95      | 12     | 730.4  | 2 | 1458.8    |
| 14 | WQLLGLGSTLLSK                              | 94      | 13     | 708.4  | 2 | 1414.8    |
| 15 | HGC(+57.02)LADFDVGGGC(+57.02)EKHC(+57.02)R | 94      | 18     | 1037.9 | 2 | 2073.9    |
| 16 | LQEEYDKFLTDLVK                             | 94      | 14     | 871.0  | 2 | 1739.9    |
| 17 | KLKDALDKR                                  | 94      | 9      | 543.8  | 2 | 1085.7    |
| 18 | WLGTLGLGSTLLSK                             | 94      | 15     | 780.0  | 2 | 1557.9    |
| 19 | HGC(+57.02)LADFDVGGGC(+57.02)EQHC(+57.02)R | 94      | 18     | 1037.9 | 2 | 2073.8    |
| 20 | WC(+57.02)LAHLK                            | 93      | 7      | 464.2  | 2 | 926.5     |
| 21 | LYPYLNVMVHWR                               | 93      | 12     | 827.9  | 2 | 1653.8    |
| 22 | HSWSFDWQHFSNMHAR                           | 93      | 16     | 1037.0 | 2 | 2071.9    |
| 23 | LVFTDELEC(+57.02)LKDAVK                    | 92      | 15     | 890.5  | 2 | 1778.9    |
| 24 | KLWSFDWQHFSNPELR                           | 92      | 16     | 1045.5 | 2 | 2089.0    |
| 25 | LWGTLLGLGSTLLGSK                           | 92      | 16     | 808.5  | 2 | 1614.9    |
| 26 | TNTLAELQVTC(+57.02)FMYR                    | 92      | 15     | 923.9  | 2 | 1845.9    |
| 27 | EAFPLLC(+57.02)C(+57.02)NLDVSR             | 92      | 14     | 847.4  | 2 | 1692.8    |
| 28 | HGC(+57.02)LADFDVGGGC(+57.02)EQHC(+57.02)R | 92      | 18     | 692.3  | 3 | 2073.8    |
| 29 | LLGAALDLHWLK                               | 92      | 12     | 675.4  | 2 | 1348.8    |
| 30 | WGTLLGLGSTLLSK                             | 91      | 14     | 723.4  | 2 | 1444.8    |
| 31 | EPVGALLGLGSTLLSK                           | 91      | 16     | 778.0  | 2 | 1553.9    |
| 32 | LLGAALDLHWLK                               | 91      | 12     | 675.4  | 2 | 1348.8    |
| 33 | KVVVESFLLSDVLK                             | 90      | 14     | 788.5  | 2 | 1574.9    |
| 34 | QQSDAAEKEGWFK                              | 90      | 13     | 762.3  | 2 | 1522.7    |
| 35 | TLVVQDYTFGKYLGLK                           | 90      | 17     | 996.5  | 2 | 1991.1    |
| 36 | LYPYLNVMHVVDK                              | 90      | 13     | 827.9  | 2 | 1653.8    |
| 37 | KLQDALDQR                                  | 90      | 9      | 543.8  | 2 | 1085.6    |
| 38 | LVSTC(+57.02)EGC(+57.02)APLLLR             | 90      | 14     | 794.9  | 2 | 1587.8    |
| 39 | WYNWGTC(+57.02)VGLLEGLC(+57.02)WHQK        | 90      | 19     | 1204.1 | 2 | 2406.1    |
| 40 | TPLTNYDNNLKNLC(+57.02)LPK                  | 90      | 17     | 1009.5 | 2 | 2017.0    |

|    |                                      |    |    |        |   |        |
|----|--------------------------------------|----|----|--------|---|--------|
| 41 | WTYM(+15.99)M(+15.99)DTV GK          | 90 | 10 | 632.3  | 2 | 1262.5 |
| 42 | LWGALLGLGSTLLSK                      | 90 | 15 | 765.0  | 2 | 1527.9 |
| 43 | DYYFNLLHVQGYMK                       | 90 | 14 | 895.9  | 2 | 1789.8 |
| 44 | LWGTLLGLGSTLLSK                      | 90 | 15 | 780.0  | 2 | 1557.9 |
| 45 | AVWGALLGLGSTLLSK                     | 90 | 16 | 793.5  | 2 | 1584.9 |
| 46 | AEGTPELDAAFWR                        | 89 | 13 | 731.9  | 2 | 1461.7 |
| 47 | LVFTDELEC(+57.02)LK                  | 89 | 11 | 683.9  | 2 | 1365.7 |
| 48 | RDALTNLLKEEVNLLNK                    | 89 | 17 | 992.1  | 2 | 1982.1 |
| 49 | NLNPFENDFDVSLK                       | 89 | 14 | 826.4  | 2 | 1650.8 |
| 50 | YVLQTLSC(+57.02)ATQTLK               | 89 | 14 | 813.4  | 2 | 1624.8 |
| 51 | WNLM(+15.99)PPWLTK                   | 89 | 10 | 651.4  | 2 | 1300.7 |
| 52 | LVM(+15.99)TDELEC(+57.02)LK          | 89 | 11 | 683.9  | 2 | 1365.7 |
| 53 | AEFPLLC(+57.02)C(+57.02)NLDVSR       | 89 | 14 | 847.4  | 2 | 1692.8 |
| 54 | HC(+57.02)AEDLMPGFLGLYVK             | 89 | 16 | 925.5  | 2 | 1848.9 |
| 55 | ELQGALADFLK                          | 89 | 11 | 602.8  | 2 | 1203.6 |
| 56 | WGA VSVNNR                           | 89 | 9  | 501.8  | 2 | 1001.5 |
| 57 | QVAFLPFGYLLDQWR                      | 89 | 15 | 927.0  | 2 | 1852.0 |
| 58 | VVEGTSWYDYLATLGLLK                   | 89 | 18 | 1014.5 | 2 | 2027.1 |
| 59 | RDALTNLLKC(+57.02)NVNLLNK            | 89 | 17 | 1000.0 | 2 | 1998.1 |
| 60 | LVSTC(+57.02)EGC(+57.02)APLLLR       | 89 | 14 | 794.9  | 2 | 1587.8 |
| 61 | KRPLLAAGLLLEV K                      | 89 | 14 | 761.0  | 2 | 1520.0 |
| 62 | KTGTLLGLWDGLSK                       | 88 | 14 | 744.9  | 2 | 1487.8 |
| 63 | WGGALLGLGSTLLSK                      | 88 | 15 | 736.9  | 2 | 1471.8 |
| 64 | YPKFVTDLLLWK                         | 88 | 12 | 761.9  | 2 | 1521.9 |
| 65 | LLSVLGLAALSPEK                       | 88 | 14 | 705.9  | 2 | 1409.8 |
| 66 | HSWSFDWQHFSNPELR                     | 88 | 16 | 1037.0 | 2 | 2071.9 |
| 67 | KDKLLGLLMLFQPQK                      | 88 | 15 | 886.5  | 2 | 1771.0 |
| 68 | RAFLPFGYLLDQWR                       | 88 | 14 | 891.5  | 2 | 1780.9 |
| 69 | VAFLPFGYLLDQWR                       | 88 | 14 | 863.0  | 2 | 1723.9 |
| 70 | EGYNWGTC(+57.02)VGLLEGLC(+57.02)WHQK | 88 | 20 | 1204.1 | 2 | 2406.1 |
| 71 | EPVGTLLGLGSTLLSK                     | 88 | 16 | 793.0  | 2 | 1583.9 |
| 72 | NVSTC(+57.02)EGC(+57.02)APLLLR       | 88 | 14 | 795.4  | 2 | 1588.8 |
| 73 | FNEVFWNVPSLLC(+57.02)SLK             | 88 | 16 | 977.0  | 2 | 1952.0 |
| 74 | WGTLLGLGSTLLSK                       | 88 | 14 | 723.4  | 2 | 1444.8 |
| 75 | TLVVQDYTFGKYLGLK                     | 88 | 17 | 996.5  | 2 | 1991.1 |
| 76 | TFSGQVFVNADTADLLFR                   | 88 | 18 | 1001.0 | 2 | 2000.0 |
| 77 | LPTGALLGLGSTLLSK                     | 88 | 16 | 771.0  | 2 | 1539.9 |
| 78 | LPDGALLGLGSTLLSK                     | 87 | 16 | 778.0  | 2 | 1553.9 |
| 79 | EEVQLLGLGSTLLSK                      | 87 | 15 | 794.0  | 2 | 1585.9 |
| 80 | LGFLPFGYLLDQWR                       | 87 | 14 | 863.0  | 2 | 1723.9 |
| 81 | RYFNLYGDGC(+57.02)FHV K              | 87 | 14 | 888.4  | 2 | 1774.8 |
| 82 | LVFTDELEC(+57.02)LKDAVK              | 87 | 15 | 890.5  | 2 | 1778.9 |
| 83 | EQSDAAEQEGWFK                        | 87 | 13 | 762.8  | 2 | 1523.7 |

|     |                                 |    |    |        |   |        |
|-----|---------------------------------|----|----|--------|---|--------|
| 84  | M(+15.99)DNKTLSC(+57.02)ATQTLK  | 87 | 14 | 813.9  | 2 | 1625.8 |
| 85  | DYYFNLLHVQGYMK                  | 87 | 14 | 895.9  | 2 | 1789.8 |
| 86  | TADLSAWTELYDK                   | 87 | 13 | 756.9  | 2 | 1511.7 |
| 87  | NWGALLGLGSTLLSK                 | 87 | 15 | 765.5  | 2 | 1528.9 |
| 88  | QSTLAELQVTC(+57.02)FMYR         | 87 | 15 | 923.9  | 2 | 1845.9 |
| 89  | AVYM(+15.99)HLYGDGC(+57.02)FHVK | 87 | 15 | 906.9  | 2 | 1811.8 |
| 90  | TRSDAAEKEGWFK                   | 87 | 13 | 762.8  | 2 | 1523.7 |
| 91  | WGAHSVNAAK                      | 87 | 10 | 501.8  | 2 | 1001.5 |
| 92  | YRLQTLSC(+57.02)ATQTLK          | 87 | 14 | 841.9  | 2 | 1681.9 |
| 93  | WDNNDLLC(+57.02)PFQGHNK         | 87 | 15 | 929.4  | 2 | 1856.8 |
| 94  | DWGTLLGLGSTLLSK                 | 87 | 15 | 781.0  | 2 | 1559.9 |
| 95  | ENGTLGLGSTLLSK                  | 87 | 15 | 751.9  | 2 | 1501.8 |
| 96  | SM(+15.99)WPVDLSVGK             | 87 | 11 | 617.8  | 2 | 1233.6 |
| 97  | WLKLLGLGSTLLMK(-.98)            | 86 | 14 | 786.5  | 2 | 1571.0 |
| 98  | NDDLASVEDLSGK                   | 86 | 13 | 681.8  | 2 | 1361.6 |
| 99  | AQEGTSWYDYNATLGLLK              | 86 | 18 | 1015.5 | 2 | 2029.0 |
| 100 | KVFLPFGYLLDQWR                  | 86 | 14 | 891.5  | 2 | 1781.0 |
| 101 | AEYEATSDLELLC(+57.02)YSDR       | 86 | 17 | 1018.0 | 2 | 2033.9 |
| 102 | NWGTLLGLGSTLLSK                 | 86 | 15 | 780.5  | 2 | 1558.9 |
| 103 | LGNPLLAAGLLEVK                  | 86 | 15 | 761.0  | 2 | 1519.9 |
| 104 | LWQLLGLGSTLLSDK(-.98)           | 86 | 15 | 822.0  | 2 | 1641.9 |
| 105 | LTPGTLLGLGSTLLSK                | 86 | 16 | 786.0  | 2 | 1569.9 |
| 106 | NVSTC(+57.02)EGC(+57.02)APLLLR  | 86 | 14 | 795.4  | 2 | 1588.8 |
| 107 | EDTLLGLGSTDTPK                  | 86 | 14 | 723.9  | 2 | 1445.7 |
| 108 | WELPWMLQLQVSK                   | 86 | 13 | 829.4  | 2 | 1656.9 |
| 109 | RMNLLSVVTLTC(+57.02)YK          | 86 | 13 | 798.9  | 2 | 1595.9 |
| 110 | MAPDLLLALGHSGFPK                | 86 | 16 | 833.9  | 2 | 1665.9 |
| 111 | FFYLLGLGSTLLMK(-.98)            | 86 | 14 | 801.5  | 2 | 1600.9 |
| 112 | DWGTLLGNGSTLLSK                 | 86 | 15 | 781.5  | 2 | 1560.8 |
| 113 | VVEGTSWYDYLATLGLLGKSFK          | 85 | 22 | 816.4  | 3 | 2446.3 |
| 114 | HC(+57.02)AEDLMPGFLGLYVK        | 85 | 16 | 925.5  | 2 | 1848.9 |
| 115 | EAVDLLLALGHSGFPK                | 85 | 16 | 833.9  | 2 | 1665.9 |
| 116 | DFNQTLSC(+57.02)ATQTLK          | 85 | 14 | 813.9  | 2 | 1625.8 |
| 117 | TPLGTLLGLGSTLLSK                | 85 | 16 | 786.0  | 2 | 1569.9 |
| 118 | KWLLGGLGYLAGPK                  | 85 | 14 | 736.9  | 2 | 1471.9 |
| 119 | WGALLGLGSTLLSK                  | 85 | 14 | 708.4  | 2 | 1414.8 |
| 120 | RYFNLYGDGC(+57.02)FHVK          | 85 | 14 | 888.4  | 2 | 1774.8 |
| 121 | LTPQLLGLGSTLLSK                 | 85 | 15 | 771.0  | 2 | 1539.9 |
| 122 | LLDTVSNFEGGAVWNAAK              | 85 | 18 | 946.5  | 2 | 1890.9 |
| 123 | VAEGGTLLGLGSTLLSK               | 85 | 17 | 808.5  | 2 | 1614.9 |
| 124 | AQEGTSWYDYLATLGLLK              | 85 | 18 | 1015.0 | 2 | 2028.0 |
| 125 | AFDSC(+57.02)LGDAADKEYLWNDMK    | 85 | 20 | 1175.0 | 2 | 2348.0 |
| 126 | EYWNTLLSVGK                     | 85 | 11 | 655.4  | 2 | 1308.7 |

|     |                                               |    |    |        |   |        |
|-----|-----------------------------------------------|----|----|--------|---|--------|
| 127 | TALDAVLGVVEYNSRLR                             | 85 | 17 | 938.5  | 2 | 1875.0 |
| 128 | DGDLSAWTESEFR                                 | 85 | 13 | 756.9  | 2 | 1511.7 |
| 129 | YHGTLLGLGSTLLSGK                              | 85 | 16 | 809.0  | 2 | 1615.9 |
| 130 | KVAGTLLGLGSTLLSK                              | 85 | 16 | 779.5  | 2 | 1557.0 |
| 131 | VEDM(+15.99)DM(+15.99)LPLLAC(+57.02)VWK       | 85 | 15 | 926.5  | 2 | 1850.9 |
| 132 | ENGTLGLGSTLLSK                                | 85 | 15 | 751.9  | 2 | 1501.8 |
| 133 | WLQLLGLGSTLLSK                                | 85 | 14 | 765.0  | 2 | 1527.9 |
| 134 | QLWSFDWQHFSNPELR                              | 85 | 16 | 1045.5 | 2 | 2089.0 |
| 135 | RLWLGSSTDNR                                   | 85 | 12 | 727.4  | 2 | 1452.8 |
| 136 | HSSLFMFFK                                     | 84 | 9  | 572.3  | 2 | 1142.6 |
| 137 | LPDGTLLGLGSTLLSK                              | 84 | 16 | 793.0  | 2 | 1583.9 |
| 138 | FDEVFWNVPSLLMNDK                              | 84 | 16 | 977.5  | 2 | 1952.9 |
| 139 | QAYEATSDLELLC(+57.02)YSDR                     | 84 | 17 | 1017.5 | 2 | 2032.9 |
| 140 | KQEGTTATYDYLATLGLLK                           | 84 | 19 | 1043.6 | 2 | 2085.1 |
| 141 | NGFLPFGYLLDKWR                                | 84 | 14 | 863.5  | 2 | 1724.9 |
| 142 | KQLTNYDNNLQNLG(+57.02)LPK                     | 84 | 17 | 1038.5 | 2 | 2075.0 |
| 143 | LVVHPGYDADYNADLALLEM(+15.99)K                 | 84 | 21 | 1182.1 | 2 | 2362.2 |
| 144 | WNGANLGLGSTLLSK                               | 84 | 15 | 766.0  | 2 | 1529.8 |
| 145 | M(+15.99)M(+15.99)ELLALDANPNADLALLEM(+15.99)K | 84 | 21 | 788.7  | 3 | 2363.1 |
| 146 | EAGTPELDAAFWR                                 | 84 | 13 | 731.9  | 2 | 1461.7 |
| 147 | AYALQTLSC(+57.02)ATQTLK                       | 84 | 15 | 834.9  | 2 | 1667.9 |
| 148 | LPFFLLSLVPTALSALWK(-.98)                      | 84 | 18 | 672.4  | 3 | 2014.2 |
| 149 | QGELPWMLQLKWK                                 | 84 | 13 | 828.9  | 2 | 1655.9 |
| 150 | FADSC(+57.02)LGDAASKEDFLNSMK                  | 84 | 20 | 1103.5 | 2 | 2205.0 |
| 151 | SQPWPEVLSLESARK                               | 84 | 15 | 835.5  | 2 | 1668.9 |
| 152 | FGWNTLLSVGK                                   | 84 | 11 | 611.3  | 2 | 1220.7 |
| 153 | YPLSLVPFLLPSK(-.98)                           | 84 | 13 | 737.0  | 2 | 1471.9 |
| 154 | WDQLLGNLAGGPK                                 | 84 | 14 | 766.5  | 2 | 1530.8 |
| 155 | TLSTAVEGPLKDASVATHK                           | 84 | 19 | 963.1  | 2 | 1924.0 |
| 156 | KGSFTVFVNADTADLLFR                            | 83 | 18 | 1001.0 | 2 | 2000.0 |
| 157 | NWGTLLGLGSTLLGSK                              | 83 | 16 | 809.0  | 2 | 1615.9 |
| 158 | KNLPDYSSPQFFDVK                               | 83 | 15 | 892.9  | 2 | 1783.9 |
| 159 | VVEGTSWYDYLATLGLLK                            | 83 | 18 | 1014.5 | 2 | 2027.1 |
| 160 | LVVPAYLLGGDGLTVFK                             | 83 | 18 | 910.0  | 2 | 1818.0 |
| 161 | EPNPFENDFDVSLK                                | 83 | 14 | 825.9  | 2 | 1649.8 |
| 162 | FATLQTLSC(+57.02)ATQTLK                       | 83 | 15 | 841.9  | 2 | 1681.9 |
| 163 | DLDPASLYHVPEGLSYAR                            | 83 | 18 | 1002.0 | 2 | 2002.0 |
| 164 | EDTLNGLGSTDTPK                                | 83 | 14 | 724.4  | 2 | 1446.7 |
| 165 | LLSVLGLAALSEPK                                | 83 | 14 | 705.9  | 2 | 1409.8 |
| 166 | WELPWMLKLKWK                                  | 83 | 12 | 829.4  | 2 | 1656.9 |
| 167 | QYGWTSAAALSLWNSRAR                            | 83 | 17 | 984.0  | 2 | 1966.0 |
| 168 | WNGTLLGLGSTLLSK                               | 83 | 15 | 780.5  | 2 | 1558.9 |
| 169 | TPLTNYDNDLQNLG(+57.02)LPK                     | 83 | 17 | 1010.0 | 2 | 2018.0 |

|     |                                  |    |    |        |   |        |
|-----|----------------------------------|----|----|--------|---|--------|
| 170 | ASPGTLLGLGSTLLSK                 | 83 | 16 | 757.9  | 2 | 1513.9 |
| 171 | HVLSPC(+57.02)PQK                | 83 | 9  | 533.3  | 2 | 1064.5 |
| 172 | QKEGTTATYDYNATLGLLK              | 83 | 19 | 1044.1 | 2 | 2086.1 |
| 173 | YPLSLVPTALSALK                   | 83 | 14 | 737.0  | 2 | 1471.9 |
| 174 | NAGAVSVNAAK                      | 82 | 11 | 501.3  | 2 | 1000.5 |
| 175 | EPALPWM(+15.99)LQLQVSK           | 82 | 14 | 828.4  | 2 | 1654.9 |
| 176 | LLDTV GK                         | 82 | 7  | 745.4  | 1 | 744.4  |
| 177 | YVELLNQV LPLYK                   | 82 | 13 | 796.4  | 2 | 1590.9 |
| 178 | FWNTLLWGK                        | 82 | 9  | 582.8  | 2 | 1163.6 |
| 179 | EM(+15.99)AYYNFPDC(+57.02)YNYFGK | 82 | 16 | 1049.4 | 2 | 2096.8 |
| 180 | LLSVGK                           | 82 | 6  | 616.4  | 1 | 615.4  |
| 181 | RLDTV GK                         | 82 | 7  | 788.5  | 1 | 787.5  |
| 182 | RYFDLYGDGC(+57.02)FHVK           | 82 | 14 | 888.9  | 2 | 1775.8 |
| 183 | KMPGTLLGLGSTLLSSR(-.98)          | 82 | 17 | 865.5  | 2 | 1729.0 |
| 184 | TVYEATSDLELLHAESTR               | 82 | 18 | 1018.0 | 2 | 2034.0 |
| 185 | LSVGK                            | 82 | 5  | 503.3  | 1 | 502.3  |
| 186 | WC(+57.02)YYLFPDC(+57.02)YNYFGK  | 82 | 15 | 1048.4 | 2 | 2094.9 |
| 187 | AVYFHLYGDGC(+57.02)FHVK          | 82 | 15 | 906.9  | 2 | 1811.8 |
| 188 | KAWSNGVGK                        | 82 | 9  | 473.8  | 2 | 945.5  |
| 189 | TLWGK                            | 82 | 6  | 705.4  | 1 | 704.4  |
| 190 | YVLQTLSC(+57.02)ATSASPK          | 82 | 15 | 813.4  | 2 | 1624.8 |
| 191 | EM(+15.99)AYYLPDC(+57.02)YNYFGK  | 82 | 16 | 1048.9 | 2 | 2095.9 |
| 192 | LLDTVSNM(+15.99)WGAVWNAAK        | 82 | 17 | 946.5  | 2 | 1890.9 |
| 193 | AWNSDLGK                         | 82 | 8  | 890.4  | 1 | 889.4  |
| 194 | EC(+57.02)WLNLATQLQGQTAGMHDLK    | 82 | 22 | 843.8  | 3 | 2528.2 |
| 195 | FTPYPGK                          | 81 | 9  | 505.3  | 2 | 1008.5 |
| 196 | AQYEATSDLELLC(+57.02)YSDR        | 81 | 17 | 1017.5 | 2 | 2032.9 |
| 197 | RLLGYTTPDTMFLSR                  | 81 | 15 | 886.0  | 2 | 1769.9 |
| 198 | QNDM(+15.99)LNQV LPLYK           | 81 | 13 | 796.4  | 2 | 1590.8 |
| 199 | TPWTSWYDYL GATLLLGK              | 81 | 18 | 1043.0 | 2 | 2084.1 |
| 200 | FWNTLLSRK                        | 81 | 9  | 582.8  | 2 | 1163.6 |
| 201 | KVSVLGLAALSPEK                   | 81 | 14 | 706.4  | 2 | 1410.8 |
| 202 | LWGTLGLLGGMLLSSR(-.98)           | 81 | 16 | 837.0  | 2 | 1671.9 |
| 203 | AFDSC(+57.02)LGDAADKEYLWNSMR     | 81 | 20 | 783.7  | 3 | 2348.0 |
| 204 | M(+15.99)HQRDALTPLLPVPVGRV NK    | 81 | 21 | 1178.7 | 2 | 2355.3 |
| 205 | TLELFNAGV LPLYK                  | 81 | 14 | 789.4  | 2 | 1576.9 |
| 206 | FGNEVFWNVPSLLC(+57.02)SLK        | 81 | 17 | 1005.5 | 2 | 2009.0 |
| 207 | RGYFNLYGDGC(+57.02)FHVK          | 80 | 15 | 916.9  | 2 | 1831.8 |
| 208 | RVVPAYLLGGGDGLTVFK               | 80 | 18 | 931.5  | 2 | 1861.0 |
| 209 | FPPWLTK                          | 80 | 7  | 888.5  | 1 | 887.5  |
| 210 | TLSTAVEGPKDALGLALR               | 80 | 19 | 963.1  | 2 | 1924.1 |
| 211 | NSGTPELDAAFWR                    | 80 | 13 | 732.4  | 2 | 1462.7 |
| 212 | WGLFDESYGDDRDL SVLLR             | 80 | 19 | 1128.6 | 2 | 2255.1 |

|     |                           |    |    |        |   |        |
|-----|---------------------------|----|----|--------|---|--------|
| 213 | ALC(+57.02)ANPTAEYTGEYQAK | 80 | 17 | 943.9  | 2 | 1885.9 |
| 214 | FM(+15.99)LLSLVPLLNESK    | 80 | 14 | 810.5  | 2 | 1618.9 |
| 215 | SSVNM(+15.99)SWVK         | 80 | 9  | 527.3  | 2 | 1052.5 |
| 216 | EGSYM(+15.99)TAYSPK       | 80 | 11 | 625.3  | 2 | 1248.5 |
| 217 | VAEAFNTGVLDSDVLQTHEPR     | 80 | 21 | 1149.6 | 2 | 2297.1 |
| 218 | AYWPTLLSVGK               | 80 | 11 | 617.8  | 2 | 1233.7 |
| 219 | C(+57.02)TWPNDPFTSVSK     | 80 | 13 | 769.8  | 2 | 1537.7 |
| 220 | M(+15.99)WGVFWNVPSLLMNDK  | 80 | 16 | 977.0  | 2 | 1951.9 |
| 221 | LALENLPLLSTLAMM(+15.99)K  | 80 | 17 | 961.0  | 2 | 1920.0 |
