# Supplementary material for: A Deeper Examination of Thorellius atrox Scorpion Venom Components with Omic Techonologies
Source: MDPI journal article supplement (doi:10.3390/toxins9120399), 2017-12-12
Supplement: s1 [file s1]

**Table S1.** Distribution of transcripts that putatively code for venom components.

| Sodium toxins |                      |         |             |         |                    |                                                                                                                                                                                  |                                                                                                                                                                                                                                                                                                                             |
|---------------|----------------------|---------|-------------|---------|--------------------|----------------------------------------------------------------------------------------------------------------------------------------------------------------------------------|-----------------------------------------------------------------------------------------------------------------------------------------------------------------------------------------------------------------------------------------------------------------------------------------------------------------------------|
| ID            | ID/Reference protein | e-value | PFAM domain | MW (Da) | Sub-classification | Amino acid sequence                                                                                                                                                              | Nucleotide sequence                                                                                                                                                                                                                                                                                                         |
| TatNaTAlp01   | P63019.1             | 2 e-28  | PF00537     | --      | alpha toxin        | <u>ILL</u> LGIERSES <b>RDGYPIASNGCKFGCSGLGENNPTCNH</b><br><b>VCEKKAGSDYGYCYAW</b>                                                                                                | ATTCTACTCTTAGGAATAGAAAGAAGCGAGTCGAGAGATGGTTATCC<br>TATAGCTTCAAATGGTTGCAAATTTGGATGCAGTGGATTAGGTGAGA<br>ACAATCCAACCTGTATACAGTCTTGTGAAAAGAAAGCCGGAAGTGAC<br>TACGGCTATTGCTATGCCTGG                                                                                                                                              |
| TatNaTAlp02   | Q5MJP5.1             | 6 e-24  | N/D         | 8500.77 | alpha toxin        | <u>MNTLS</u> TF <del>TL</del> TS <del>LLLL</del> IIGFYQYQAARFVRRKNMTFYE<br><b>CSELSGHD</b> PYCVRTCEEHESKEEGYCKEFD <b>DRY</b> GISAC<br><b>YCPNIVG</b> TKVVMCYAAL <b>QRKCKF</b> *  | ATGAATACACTAAGCACCTTTACCTCACTTCATTACTTCTTCTTATT<br>ATTGGCTTTTATCAATATCAAGCACAGGCAAGATTGTGAGAAGGAA<br>AAACATGACATTTTACGAATGCAGCGAATTATCTGGCCATGATCCCT<br>ATTGTGTTCTGACTTGCGAAGAGCACGAATCAAAAGAGGAGGGATA<br>TTGTAAAGAATTTGACCGTTATGGAATTTCTGCTTGTACTGCCCAAA<br>CATTGTAGGAACCAAGTTGTTATGTGCTACGCAGCTCTTCAAAGAA<br>AATGCAAAATTC |
| TatNaTAlp03   | Q5MJP5.1             | 5 e-34  | PF00537     | 7986.39 | alpha toxin        | <u>MKTIAN</u> MTYFYCYCLLLFVGIFNIQVGGK <b>FVRKP</b> NGSFY<br><b>ECG</b> MLIGYQPYCVQ <b>TC</b> KEHKA <b>PEKGYCKEMYP</b> FG <b>L</b><br><b>PGGCYCPNIPQNKIRMC</b> R <b>GALKNEC</b> * | ATGACTTATTATTTCTACTGTCTCTTGCTTTTCGTAGGCATTTTAAATA<br>TTCAAGTAGGAGGAAAATTTGTGAGAAAACCAATGGCTCATTTTAT<br>GAATGCGGTATGTTAATAGGGTACCGCCATATTGCGTTCAGACTTG<br>TAAAGAACACAAAGCTCTGAAAAAGGCTACTGCAAAAGAAATGTAT<br>CCTTTTGGACTCCCTGGTGGCTGCTACTGTCCAAATATTCTCTCAAAAT<br>AAAATAAGAATGTGTCGCGGTGCCCTTAAAAATGAGTGT                     |
| TatNaTBet01   | P0CI45.1             | 9 e-17  | PF00537     | 6672    | beta toxin         | <u>MNCSTVL</u> IFCLIAIVFEFAGVECK <b>KDGYPLTTEGLKF</b> SC<br><b>AAGMLGDN</b> RFCL <b>SIC</b> SRGSNYGYCYFFGCYCEGLN<br><b>DDVKIWSG</b> *                                            | ATGAATTGCTCTACTGTTCTCATTTTCTGCCTAATTGCCATTGTTTGT<br>AATTTGCTGGTGTGGAGTGCAAAAAGGATGGATATCCTTTGACTACA<br>GAAGGATTGAAGTTCAGTTGTGCTGCAGGAATGTTAGGTGATAACAG<br>ATTCTGTCTATCTATCTGTAGAAGTCGTGGTTCAAATTATGGTTATTG<br>TTACTTCTTTGGTTGTTATTGTGAAGGCTTAAATGATGATGTTAAAT<br>TTGGAGTGGCTAA                                              |
| TatNaTBet02   | P01491.3             | 3 e-16  | PF00537     | 6544.9  | beta toxin         | <u>MNCSTVL</u> IFCLIAIVFEFAGVECK <b>KDGY</b> PVTKEGL <b>KVS</b><br><b>CAAGMILGDN</b> RF <b>CAICKGDG</b> ADYGYCYGFGCYCE<br><b>GLNDDVKIWSG</b> *                                   | ATGAATTGCTCTACTGTTCTCATTTTCTGCCTAATTGCCATTGTTTGT<br>AATTTGCTGGTGTGGAGTGCAAAAAGGATGGATATCCTGTGACTAAG<br>GAAGGATTGAAGGTCAGTTGTGCTGCAGGAATGATATTAGGCGATA<br>ACAGATTCTGTCAAGCCATCTGTAAAGGCGATGGTGCCGATTATGGT<br>TATTGTTACGGGTTTGGTTGTTACTGTGAAGGCTTAAATGATGATGTT<br>AAAATTTGGAGTGGCTAA                                          |
| TatNaTBet03   | D9U299.1             | 4 e-12  | PF00537     | 5193.2  | beta toxin         | <u>MHISMAAILPLL</u> CLIVTLVFVAETA <b>YS</b> GFF <b>PLDENGK</b> VY<br><b>RCE</b> DLGPNQLCNATCVFHGGTYGYCAVSSCYCEN <b>R</b> *                                                       | ATGCATATCAGCATGGCAGCCATTTTGCTCTTCTCTGTCTGATCGTT<br>ACTTTAGTCTTTGTGTGCTGAAACTGCATACAGCGGATTTTCCGCTG<br>GACGAGAATGGGAAAGTGTACCGCTGCGAAGATTTGGGGCCTAATC<br>AGCTGTGCAATGCTACCTGTGTCTTCCATGGTGGAACCTATGGCTACT<br>GTGCCGTCTCCAGCTGTTACTGCGAAAATCGATAA                                                                             |
| TatNaTBet04   | Q7YT61.1             | 2 e-27  | N/D         | --      | beta toxin         | <u>MNSLLIIT</u> ACLVLFGTVWA <b>KEGYLVNKSTGCKYGC</b> FW<br><b>LGKNENC</b>                                                                                                         | ATGAACCTCTTTGTTGATAATCACTGCTTGTGTGGTCTATTCCGAACA<br>GTGTGGGCAAAAGAAGGTTATCTGGTAAACAAGAGCACGGGCTGCA<br>AATACGGTTGCTTCTGGTTGGGAAAAAACGAAAACTGC                                                                                                                                                                                |
| TatNaTBet05   | ACJ23108.1           | 2 e-10  | N/D         | --      | beta toxin         | <u>IMRVIVFTAT</u> VFALSLGGYSA <b>KNA</b> YPRNYEGNCY <b>R</b> CR<br><b>Y</b> PD <b>KDD</b> FCNDICKSLHKANAGECSVSNLFC <b>FCVGIKE</b><br><b>ENISIKDV</b> GKA                         | ATCATGAGGGTTATTGTCTTTACTGCCACGGTATTGTCTTTTCTCTG<br>TTGGGCGGATACAGTGCCAAAAATGCGTATCCACGCAACTACGAAG<br>GGAACGTGCATCGATGTCTGTTATCCCGATAAAGATGATTTTIGCAAT<br>GACATCTGTGAAAAAGTTTGCACAAAGCAACGCTGGTGAATGCAGCGT<br>ATCTAATTTATTCTGTTTCTGCGTTGGCATCAAAGAGGAAAAATATTAG<br>CATAAAAGACGTTGAAAAAGCA                                    |
| TatNaTBet06   | P0C1B8.1             | 4 e-11  | PF00537     | --      | beta toxin         | <u>MAVILSIFCFV</u> VALTVIDSENTYNGFF <b>PLDENGEV</b> YRC<br><b>EFLGYDQL</b> CNATCAF <b>HGGIYGYCAISSCYCERGR</b> NST<br><b>AAT</b>                                                  | ATGGCAGTCATCTTGTCTATTTTCTGCTTTGTCTGCTTTAACCGTTA<br>TTGATAGTGAAAATACGTATAATGGATTTTTCCTTGGATGAGAAG<br>GGGGAAGTATACCGCTGCGAATTTCTTGGGATATGATCAGCTATGCAA<br>TGCTACTTGTGCCTTCCATGGTGGGATTTATGGATATTGTGCCATCTC<br>CAGTTGTTATTGCGAAAGAGGTAGAAATCAACGGCAGCTACA                                                                      |

| TatNaTBet07      | P59865.1             | 3 e-9   | N/D         | --      | beta toxin         | <u>MIFAAYWITLFLFYVLFVPVATTPSPTSDDVKRVYIPGYADKTCWKLGNSFCRDICQETAGHGYCHLFCYCYESIS</u>          | ATGATATTTTGCTGCTTATTGGATAACGCTGTTCCTATTTTACGTTCTTTTGTTCAGTAGCTACCACTCCATCACCACGCTCTGATGATGTTAAAAGAGTTTACATTCTGGCTATGCTGACAAAACCTTGCTGGAAATTAGGATCGAATTCCTTCTGCAGAGATATTTGCCAGGAAACAGCAGGACATGATATTGTCATCTTTTCGTTTGCTATTGTGAAAGCATTTC      |
|------------------|----------------------|---------|-------------|---------|--------------------|----------------------------------------------------------------------------------------------|-------------------------------------------------------------------------------------------------------------------------------------------------------------------------------------------------------------------------------------------|
| TatNaTBet08      | P15223.3             | 6 e-9   | PF00537     | 6191.6  | beta toxin         | <u>MKCF AFLTVCLAVVLFEEFEVEGKDGY PVDANGNVFNCVPGKLEVCKSACGERGSDQISCLAF TCWCDGMND DAETWKHD*</u> | ATGAAGTGT TTTGCTTTCTCAGATTGCTGCTGCTGCTCCTTTTGAATTTACTGAGGTGGAAGGAAAGGATGGATATCCAGTGGATGCGAATGGAAATGTTTCAACTGCGTTCCAGGGAAGTTAGAAAGTTGTAAATCTGCGTGTGGTGAGCGTGGATCTGATCAAATTTCTGCTCGCATTCACTTGCTGGTGTGATGGGATGAACGATGATGCCGAAACATGGAACAACGAC |
| TatNaTBet09      | Q4LCT0.1             | 6 e-9   | N/D         | 5178.1  | beta toxin         | <u>MQDADNNKILQOKQGIFITGMEGCD FVGGKGVYLDVGC TELGKNSLCEEKCRQVCNSYGYCYSFECWCE*</u>              | ATGCAAGATGCCGACAATAATAAAATATTGCAGCAAAAACAAGGAAATTTTCATAACTGGAATGGAAGGCTGTGATTTTGTGGTGGAAAAGGAGTGATATCTCGATGTTGGCTGTACAGAACTGGGCAAAATCTGTTGTGTAAGAGAAGTGCCGACAAGTTGCAATTCCTATGGTTATTGCTACAGTTTCAATGTTGGTGTGAA                              |
| TatNaTBet10      | Q4LCT0.1             | 7 e-11  | N/D         | 5392.13 | beta toxin         | <u>MLRLFSILIVFGMFKTSMEGCAVSGGIGTTYINDLCSNLGKNDFCKEKC REICYSYGYCYFFQCWCE*</u>                 | ATGCAGCTGCGATTGTTTTCGATCTTGATTGTATTGGAATGTTCAAAACCAAGTATGGAAGGCTGTGCTGTTTCTGGTGGAAATAGGAACCACTCATCAATGACCTCTGTTTCAATCTCGGCAAAATGATTTTGTAAAGAGAAATGCAGAGAAATTGTTATTCTTACGGTTATTGCTACTTCTCC AATGCTGGTGCGAA                                  |
| Potassium toxins |                      |         |             |         |                    |                                                                                              |                                                                                                                                                                                                                                           |
| ID               | ID/Reference protein | e-value | PFAM domain | MW (Da) | Sub-classification | Amino acid sequence                                                                          | Nucleotide sequence                                                                                                                                                                                                                       |
| TatKTxAlp01      | API81322.1           | 1 e-22  | PF14866     | 4563.34 | alpha toxin        | <u>MNKALFATVLIVLMVFAVSGIPAKNYAPTGGCPLSDALCANYCKKNKFGNGGKCDG TKCKCSIK*</u>                    | ATGAATAAGGCTTTATTTGCAACTGTTCTAATTTGTTTGTATGGTGTTCGCCGTTAGTGGTATTCCAGCAAAAACATGCAACCACTGGAGGCTGCCATTGTGACACGCCCTTTGTGCTAATTACTGCAAGAAAAACAATTTGGAAATGGTGGGAAATGCGATGGAACATAATGCAATGTTCTATT AAG                                             |
| TatKTxAlp02      | P45696.1             | 1 e-9   | PF00451     | --      | alpha toxin        | <u>MRLAII LLLMTTLVLTIGAPPNGAKCSSSVQCTRPCRHHGGGTHGKCMNGR</u>                                  | ATGAGGCTAGCAATTATTTGCTGTTGATGACAACATTTGGTGTGTGACAATTGGTGCACCTCCCAATGGTGCAAAATGTTTCATCATCTGTCCAGTGCACACGTCTTGCCGACATGGAGGAGGAACACATGGAAATGCATGAACGGAAGA                                                                                    |
| TatKTxAlp03      | API81318.1           | 3 e-13  | PF00451     | 3933.78 | alpha toxin        | <u>MIGSFILTFDVVTTTEGGKACTRTKECWSYCKKKDGCPKGKCINKICH CYGC*</u>                                | ATGATCGGCTCTTTATATTAACGTTTGATGTAGTGCAACTGAAGAGGAAAGGCCTGCACTAGAACTAAAGAAATGTTGGTCTATTGTAAAAAGAAGGACGGATGTCCTAAAGGAAAAATGTATAAACAAAATATGCCATTGCTATGGATGT                                                                                   |
| TatKTxAlp04      | API81318.1           | 4 e-13  | PF00451     | 4491.24 | alpha toxin        | <u>MRTVCKKMNTKFAIFLIFTIVILLEGATTLEKGAKCETSKYCS DYCDRINKCPRGKCISRECKCYVCGG*</u>               | ATGAGAACC GTGTGCAAAAAGATGAATACAAAATTTGCTATCTTCCTTATTTTACCATTGTGATACTGCTTGAAGGTGCAACGACACTCGAAA AAGGAGCCAAATGCGAAACGAGCAAATACTGTTTCGATTACTGTGATAGGATCAACAAATGTCCACGTGGAAAATGCATAAGCAGGGAATGCAAGTGCTATGTTTGTGGAGGC                          |
| TatKTxAlp05      | API81318.1           | 3 e-12  | PF00451     | 4606.35 | alpha toxin        | <u>MVLKF AFILLMFTATILTIGAMALEKGAECQTTRYCWDYCGMINNCPRGK CINWECKCYICGG*</u>                    | ATGGTTCTAAAATTTGCTTTCATTCTCCTTATGTTTACCGTACGATA TTGACAATTGGTGCAATGGCACTCGAAAAAGGAGCCGAATGCCAAACGACAAGATACTGTTGGGATTATTGTGGTATGATCAACAACCTGTCCA CGTGAAAATGTATAAACTGGGAATGCAAAATGCTACATTTGTGGGGGA                                           |
| TatKTxAlp06      | API81318.1           | 2 e-21  | PF00451     | 4004.59 | alpha toxin        | <u>MGTKFVFITLLATTVILAFGALTVEGGKNCSGSKECYDYCYKTTGCSRAK CINRACKCYGCSG*</u>                     | ATGGGTACAAAATTCGTCTTCATTACACTCTTGGCCACCCTGTGATA TTAGCGTTTGGTGCCTGACAGTTGAAGGAGGGAAGAATTGACAGCGATCTAAAGAATGTTATGATTATTGTTATAAGACAACCGGATGTTCTCGTGCAAAATGCATCAATAGGGCATGAAATGTTACGGTTGTAGTGG A                                              |
| TatKTxAlp07      | AHJ59318.1           | 2 e-16  | PF00451     | 4656    | alpha toxin        | <u>MSTKFFVLMMLMVSTVILTFDVM TTEGGKTCTGSNQCYPYCRKQTGYNAGKCINGRCKCYGG*</u>                      | ATGAGCACGAAATTTTTCGTCCTTATGCTTATGGTCAGCACTGTTATCTGACATTTGATGTAATGCAACTGAAGGAGGAAAGACCTGCACTGGAAGTAACCAATGTTATCTTATTGTAGGAAGCAGACTGGATATAATGCTGGAATGTATAAACGGAAGATGCAAAATGCTATGGAGGT                                                       |

|             |            |        |         |         |               |                                                                                                                                                                                             |                                                                                                                                                                                                                                                                                                                                          |
|-------------|------------|--------|---------|---------|---------------|---------------------------------------------------------------------------------------------------------------------------------------------------------------------------------------------|------------------------------------------------------------------------------------------------------------------------------------------------------------------------------------------------------------------------------------------------------------------------------------------------------------------------------------------|
| TatKTxAlp08 | AFB73769.1 | 7 e-13 | PF00451 | 3533.5  | alpha toxin   | <u>MSTKFFILMLMVGSVILTFDVMTEGGKTCTGSHQCRP</u><br><u>YCIEQTGYNNGKCMNGRCKC*</u>                                                                                                                | ATGAGCACAAAAATTTTCATCCTTATGCTTATGGTCGGCTCTGTTATA<br>CTGACATTTGATGTAATGACAACTGAAGGAGGAAAGACCTGCACTG<br>GAAGTCACCAATGTCGGCCCTATTGTATAGAGCAGCTGGATATAAT<br>AATGGAATGTATGAACGGAAGATGCAATGCTAG                                                                                                                                                |
| TatKTxAlp09 | AHJ59318.1 | 5 e-19 | PF00451 | 4560.25 | alpha toxin   | <u>KFFILMLVVSSVILTFGVMTEGGGLPCNGSHQCWDYC</u><br><u>RAKTGCFSAKCMNGRCKCYGCSSVNSLQ*</u>                                                                                                        | AAATTTTTCATCCTTATGCTTGTGGTCAGCTCTGTTATATTGACCTTTG<br>GTGTAATGACAACTGAAGGAGGACTGCCCTGCAATGGAAGTCACCA<br>ATGTTGGGACTATTGTGCGAGCTAAGACAGGATGTTTATGTCAAAAT<br>GTATGAACGGAAGATGCAATGCTACGGTGTCTTCTGTTAATTCCTT<br>TACAA                                                                                                                        |
| TatKTxAlp10 | P0DJ32.1   | 2 e-16 | PF00451 | 3607.4  | alpha toxin   | <u>MKTNIVLAFLLSFLIAVAAEGEGERSTRAISCVGSKECV</u><br><u>PKCRNQGCKNGKCMNKKCKCYC*</u>                                                                                                            | ATGAAAACGAATATTGTCCTGGCATTCTTTTGTCTAAGCTTCTTAATA<br>GCCGTTGCAGCTGGTGAAGGTGAGAGAAGCACTCGGGTATCAGCT<br>GTGTCCGTAGCAAGGAATGTGTTCCAAAGTGTAGAAATCAAGGATGT<br>AAAAATGGAATGCAATGAATAAGAAGTGCAATGTTACTGCTAA                                                                                                                                      |
| TatKTxAlp11 | P55928.1   | 7 e-10 | PF00451 | --      | alpha toxin   | <u>ILTFDVMKTEGRM</u> <u>SC</u> <u>TANRQCWPFCRDHTGYISGKCI</u><br><u>NR</u> <u>SKCYRG</u>                                                                                                     | ATACTGACATTTGATGTAATGAAGACTGAAGGAAGAATGTCCTGCAC<br>TGCAAAATCGCCAATGTTGGCCCTTTTGTAGAGACCATACTGGATATA<br>TTAGTGGAAAATGTATAAACAGAAGTTGCAATGCTACCGAGGTTAA                                                                                                                                                                                    |
| TatKTxAlp12 | API81324.1 | 5 e-23 | N/D     | 4114.86 | alpha toxin   | <u>MNKLPCFILISLLFIVITNVAVVDGISAGCPLSEKLCTSY</u><br><u>CKRGRFGSKGKCVGSIGTDCKCYI*</u>                                                                                                         | ATGAACAAATTAACCTTGCTTTATTCTGATTTCATTGCTTCATCGTT<br>ATAACTAACGTTGCAGTCGTGGATGGGATATCAGCTGGCTGCCCGTT<br>GTCTGAAAACTCTGCACCAAGTTATTGCAAAAGAGGACGATTGCGGAT<br>CAAAGGGGAAGTGTGTTGGAAGCATAGGAATGACTGCAAAATGTTA<br>CATT                                                                                                                         |
| TatKTxAlp13 | ACJ23158.1 | 7 e-10 | N/D     | 4436.1  | alpha toxin   | <u>MKLKHLIFLLICTIASCEDHRYRRSRGCSRTGACMDY</u><br><u>CSIRVHEPQNHRRCPPGEYCCTLVV*</u>                                                                                                           | ATGAAGCTTAAACATTTACTGATTTTCTTAATATTATGTACAATTGCT<br>AGCTGTGAAGATCATCGTTACAGACGTTCTAGAGGATGCAGTCGTAC<br>TGGAGCCTGTATGGATTACTGTAGTATACGTGTTTCATGAGGCACAAA<br>ACCACAGAAGATGCCCTCCAGGAGAATACTGTTGTACTCTGTTAGTT                                                                                                                               |
| TatKTxAlp14 | AOF40181.1 | 7 e-11 | N/D     | 3644.13 | alpha toxin   | <u>MKLIIIIIIIIITLEIATILPTIEGRKCYDSGWCGGPCRDK</u><br><u>GASYGKCIDNQCRCYR*</u>                                                                                                                | ATGAAGCTGATTATATTACTGCTTTTGCTTACTCTAGAAATAGCAACG<br>ATTCTTCCAATATCGAAGGCAGAAAGTGCTATGATTCCGGATGGTG<br>CGGAGGACCGTGTGAGATAAAGGAGCATCTTACGGTAAATGCATA<br>GACAACCAATGTCGGTGCTACAGA                                                                                                                                                          |
| TatKTxAlp15 | API81322.1 | 7 e-31 | N/D     | 3701.21 | alpha toxin   | <u>MNKAYCAIFLVVLYMFVAVSVLP</u> <u>TESVPTGGCPSDSLCA</u><br><u>KYCKSNKYGSTGKCDGTSCKCSLG*</u>                                                                                                  | ATGAATAAGGCTTATTGCGCTATATTCCTTGTGGTGCTAGTAATGTTT<br>GCTGTCAAGTGTGCTGCCAACTGAGAGCGTACCAACTGGTGGATGCC<br>AAGTGATTCCCTCTGTGCAAAATACTGCAAAAGTAACAAATATGGTT<br>CTACTGGAATGCGATGGCACCAGTTGTAAGTGTTCCCTTGGATGA                                                                                                                                  |
| TatKTxScr01 | P0C8W5.1   | 4 e-39 | PF14866 | 9051.78 | scorpine like | <u>MQKLFAVLCILSLATFCTCGLIKEKHVQKGV</u> <u>DALTNLI</u><br><u>PAPVVGGIINKVAKQMVHKGKQELCAF</u> <u>NKNDVMG</u><br><u>WCDKACLEKEQTNGFCHG</u> <u>TKCKCGKPLSY*</u>                                 | ATGCAGAACTTTTCGCTGTTTGTGTATTCTCAGTTTGGCAACTTTC<br>TGCACATGTGGTTTAATCAAAGAGAAACACGTTTCAAGAGGAGTTG<br>ATGCTTTGACCAATTTAATACCTGCGCCAGTTGTAGGAGGAATCATA<br>AATAAGGTTGCGAAACAGATGGTGCACAAGATGGGTAAAGTTCAAG<br>AATTATGTGCTTTCAACAAAGATGTATGGGTTGTTGTGATAAAGCC<br>TGCCTGGAGAAAGAACAGACAAATGGATTTTGTACGGCACTAAAT<br>GCAAGTGCGGGAACCTTTGAGCTATTAA |
| ViScplp2    | API81325.1 | 8 e-42 | PF14866 | 8497.85 | scorpine like | <u>MNAKITVLF</u> <u>FLVAITIASCAWISEKKIQDAIDKRLP</u> <u>NGA</u><br><u>VKSAIKAVVHKA</u> <u>AKNKHGCLADFVGGGCEQHCRK</u><br><u>TEDKEGVCHG</u> <u>TKCKCGIPRAYRK*</u>                              | ATGAACGCTAAAATAACTGTCCTATTTTCTGGTAGCCATTACAATT<br>GCTTCTGTGCTGGATAAGCGAGAAAAAATCCAAGATGCTATCGA<br>TAAGAGGTTGCCAAACGGAGCTGTGAAAAGCGCAATCAAAGCCGTA<br>GTACACAAAGTGCCAAAAATAAGCATGGCTGTCTAGCTGATTTTGA<br>TGTAGGAGGTGGATGCGAACAGCATGTCAGAAAAAAGTGAAGATAAA<br>GAAGGAGTCTGCCACGGAACCAAGTGCAATGCGGTATTCCTCGTGC<br>ATATAGAAAA                    |
| TatKTxScr02 | P0C8W5.1   | 2 e-49 | PF14867 | 9228.06 | scorpine like | <u>MQIKFTILILLVISTFC</u> <u>SCGLIREKYFHQGV</u> <u>DALTPLIPV</u><br><u>PVVG</u> <u>GVNVKVAQMIHKGKIQSLCAF</u> <u>NKDMAGLC</u><br><u>EKKCQET</u> <u>EKVKG</u> <u>YCHG</u> <u>TKCKCGKPLSYK*</u> | ATGCAGATAAAATTTACCATICTGATTTTACTTGTGATTCAACATTT<br>TGTTCTGTGGCTTAATCCGTGAGAAATATTTTCAACAGGATGGA<br>CGCTTTAACTCCATTAATACCAGTTCTCTGTGGTTGGAGGAGTCGTAA<br>ATAAAGTTGCAAAACAGATGATTCACAAAATCGGCAAAATTCAAAG<br>CCTATGTGCTTTCAACAAAGACATGGCTGGTTTATGTGAGAAAAAT<br>GTCAGGAAACAGAAAAGTGAAAGGATACTGCCACGGTACTAAATG<br>CAAGTGCGGAAAGCCTTTGAGCTACAAA |

| TatKTxKap01    | P0DJ41.1             | 5 e-24  | N/D         | 3092.71 | kappa toxin             | <u>MKLLSIVFVLVLVFALLPMEVSCEPNAIENSRKNYEDISRNI/KRSCKRVCSGSRRSKQCMQKCKPTPGR*</u>                 | ATGAAACTGCTATCAATCGTGTGTTGTGTGGTGCTGGTTTTTGCTTTGCTTCCAATGGAAGTTTCCTGTGAACCAATGCCATAGAGAATAGCAGAAAAATTATGAAGACATTTCAAGAAATATGTCAAAAGATCTTGCAACGAGTATGTTCTGGAAGCAGGCGTTCCAAGCAGTGTATGCAGAAATGTAACCGACTCCTGGTCGTTGAGAAACAAATTCGGTTCTAAGTTTGATTCCAAT                                                                  |
|----------------|----------------------|---------|-------------|---------|-------------------------|------------------------------------------------------------------------------------------------|-------------------------------------------------------------------------------------------------------------------------------------------------------------------------------------------------------------------------------------------------------------------------------------------------------------------|
| TatKTxDel01    | P0C8W3.1             | 1 e-39  | PF00014     | 7457.59 | delta toxin kunitz type | <u>MIFAGCLLLILASNALLVTVAGHHKKQVNCLLPKAGPCKGSFARYYFDIESGSKAFIYGGCDANSNFAKRHHCEKRCRRFSVLGI*</u>  | CGCACAAAAGAAAAATTAATTATTACGGAAAAAATGATTTTCGCCGGCTGCCTTTTGTGTATTTTGGCTTCCAATGCCTTGTTAGTGACAGTGGCTGGGCACCACAGAACAAGTTAACTGCCTTACTTCCACCTAAGGCAGGACCTGCAAAGGTTCTTTTGCAAGATATTACTTTGATATAGAATCTGGAAGTTGTAAAGCGTTTATCTATGGAGGATGTGATGCAAATCTAACAACTTCGCCAAAAGACACCACTGTGAAAAGCGTTGCCGAAGATTTTCGTTCTTGGAATTAGAAAAAGCCAC |
| TatKTxDel02    | ACV66786.1           | 3 e-16  | PF00014     | 6537.68 | delta toxin kunitz type | <u>MASFLLFFLLIALVNSEDDVCELPPETGPCKARMLMFYYNSTCKCCDDFTYGGCNGNGNRFLTVDDECLYKCAED*</u>            | AGAATTTCATATATTTTAGAGAATAAGGCTATTAGTTATAAATTCCTCTGCGAAGAGATGGCCTCATTTTGTATTCTTCTGCTTATAGCTTTAGTTAATTCGGAAGACGATGCTGTGAACCTCTCCAGAAACAGGACCTTGCAAGGCAGGTATGCTAATGTTTATTACAACCTACATGCAAATGTTGCGATGACTTCACTTATGGAGGATGCAATGGAAATGGCAATAGATTCTTAACAGTAGATGAGTGCTTATATAAATGTGCAGAAGATTAG                               |
| Calcium toxins |                      |         |             |         |                         |                                                                                                |                                                                                                                                                                                                                                                                                                                   |
| ID             | ID/Reference protein | e-value | PFAM domain | MW (Da) | Sub-classification      | Amino acid sequence                                                                            | Nucleotide sequence                                                                                                                                                                                                                                                                                               |
| TatCaTOme01    | JAV47697.1           | 3 e-26  | PF02819     | 6006.83 | Agatoxin-like           | <u>MKLFVTTLFLCLLFLEISSFGDEYTRTDLSPRKGCIRKYRSCDHNKSGCCDNASCKCNLFGSNCKCQRKGMFQG*</u>             | ATGAAACTCTTCGTTACAACATTGTTTCTGTGTTTATTGTTTCTCGAAATCAGCTCATTGGGGATGAATACACGCGAACGGACTTATCACCACGAAAAGGTTGTATTTCGAAATACAGAAGCTGTGATCATAACAAGAGTGGATGCTGCGATAATGCCTCTTGTAATGCAATCTATTTGGGAGCAACTGCAAGTGCCAGAGAAAGGGAATGTTCCAAGGT                                                                                      |
| TatCaTClc01    | A0A1L4BJ42           | 2 e-26  | PF08099     | 3788.48 | Calcin-like             | <u>MKQNTMTIIFIVFIVTFASLTIYGAEASEANFLERRADCLAHKLCKKKNKDCCSKKCSRRGTNPEQRCR*</u>                  | ATGAAGCAAAATACAATGACCATTATTTTATTGTTTTCATTGTCACATTGTCTCATTTGACCATCTATGGTGCAGAGCAAGTGAAGCCAATTTTGGAGAGAAGGGCAGATTGCTTAGCACATCTCAAACCTCTGTAAAAAGAAACAAGGATTGTTGCAGCAAGAAATGTTCCAGAAGAGGAACAAATCCTGAGCAGAGATGCAGA                                                                                                     |
| TatCaTClc02    | P60252.1             | 9 e-12  | PF08099     | 4866.3  | Calcin-like             | <u>MKAIIIFLITFIMATTFVSCIKFYVNPYSSSSDVDYADDDQSNDDKESCAGYMEDCSKNSDCCSDRCRRKGTRSRKRCRSNPHDDD*</u> | ATGAAGGCAATTATTTTCTGATCACCTTTATCATGGCTACAACATTTGTTTCTGTATCAAGTTTACGTAAATCCCTATAGTTCTTCTGCAGACGTGGATTACGCAGATGATGACGATCAATCTAATGATGACAAAGAAAAGCTGTGCAGGTTATATGGAGGATTGTAGCAAAAATAGCGACTGTTGAGTGACAGATGTAGGAGAAAAGGGACGAGGTCAAGAAACGATGTGTTCAAATCCTCACGACGACGATTGA                                                  |
| TatCaTLio01    | P0DJ08.1             | 7 e-32  | N/D         | 4149.85 | Liotoxin-like           | <u>MSFVAKISFLLLLVAVISTVTGRDVTNLFESKSDVERDLPLSDEYQPCVVRPRKCKPHLKCSKAQICVDPNKGW*</u>             | ATGAGCTTTGTAGCGAAAATATCCTTCCTTCTTTTGTGGTAGCTGTGATCTCTACAGTCACAGGTAGAGATGTCACCAATTTATTTGAATCTGAGAAAAGTGACGTAGAAAGAGACCTTCTCTGAGTGACGAATATCAGCCATGCGTTTCGCCCCAGAAAATGTAAACCTCACCTGAAATGCAGCAAGGCACAAATCTGCGTTGATCCTAACAAAGGATGG                                                                                     |
| TatCaTLio02    | P0DJ08.1             | 4 e-32  | N/D         | 4178.85 | Liotoxin-like           | <u>MSPAAKISLLLLLIAMVSTVTGGDIVNLFESKSDVERDLPLSDEYEPVVRPRKCKPHLKCSKAQICVDPNRGW*</u>              | ATGAGCCCTGCAGCGAAAATATCCCTCCTTCTGTTGCTGATAGCTGTGATGTCTACAGTTACAGGTGGAGATGTCGTCAAATTTGTTGAATCTGAGAAAAGTGACGTAGAAAGAGACCTTCTCTGAGTGACGAATATGAGCCGTGCGTTTCGCCCCAGAAAATGTAAACCTCACCTGAAATGCAGCAAGGCACAAATCTGCGTTGATCCTAATAGAGGATGG                                                                                    |
| TatCaTLio03    | P0DJ08.1             | 1 e-33  | N/D         | 4149.85 | Liotoxin-like           | <u>MSFVAKISFLLLLITVISTVTGGDVLNLFESKSDTERDLP LSDEYQPCVVRPRKCKPHLKCSKAQICVDPNKGW*</u>            | ATGAGCTTCGTAGCAAAAATATCCTTCCTTCTGTTGCTGATAACTGTAATCTCTACAGTCACAGGTGGGATGTCCTCAATTTGTTGAATCTGAGAAAAGTGACACAGAAAGAGACCTTCTCTGAGTGACGAATATCAGCCATGCGTTTCGCCCCAGAAAATGTAAACCTCACCTGAAATGCAGCAAGGCACAAATCTGCGTTGATCCTAACAAAGGATGG                                                                                      |

| TatCaTLio04                  | P0DJ08.1             | 7 e-30  | N/D         | 4143.81 | Liotoxin-like      | <u>MSFVAKISFFLLLI</u> <u>AVISTVTGRDVTNLF</u> <u>FESEKSDIVERGFS</u><br><b>LSDEYQPCVRPRKCKPHLKCSKAQICVDPNRGW*</b>                 | ATGAGCTTTGTAGCGAAAAATATCCTTCTTTTGTCTGATAGCTGTG<br>ATCTCTACAGTCACAGGTAGAGATGTCACCAATTTATTTGAATCTGA<br>GAAAAGTGACGTAGAAAGAGGCTTTTCTCTGAGTGACGAATACCAG<br>CCTTGCGTTTCGCCCCAGAAAAATGTAAACCTCACCTGAAATGCAGCAA<br>GGCACAATCTGCGTTGATCCTAATAGAGGATGG                                     |
|------------------------------|----------------------|---------|-------------|---------|--------------------|---------------------------------------------------------------------------------------------------------------------------------|-----------------------------------------------------------------------------------------------------------------------------------------------------------------------------------------------------------------------------------------------------------------------------------|
| Host Defense Peptides (HDPs) |                      |         |             |         |                    |                                                                                                                                 |                                                                                                                                                                                                                                                                                   |
| ID                           | ID/Reference protein | e-value | PFAM domain | MW (Da) | Sub-classification | Amino acid sequence                                                                                                             | Nucleotide sequence                                                                                                                                                                                                                                                               |
| TatHDPDef01                  | KFM64187.1           | 2 e-12  | PF01097     | --      | Defensin-like      | ILCTFETAKAQFGFGCPLFPNDCNKHCQTLKYRGGYC<br>TNFLERTCKCYG                                                                           | ATCTTTGTGCACCTTTGAAACTGCAAAAGCCCAATTTGGATTGGATGTC<br>CTTTGTTTCCAAACGATTGCAATAAACATTGTCAGACCTTGAAGTATAG<br>AGGGGGTACTGTACAAACTTCTTGGAAACGTACCTGCAATGCTATGG<br>A                                                                                                                    |
| TatHDPDef02                  | AIX87626.1           | 1 e-21  | PF01097     | 4544.3  | Defensin-like      | <u>MKFVAIMLIILVAF</u> <u>CILEDGLVEADYGCPFNPGKCHR</u><br><b>SCIYLGYPEGRCKGTFKKNACACYRPKG*</b>                                    | ATGAAATTCGTAGCCATTATGTTAATCATCTGGTTGCCTTCTGTATTTT<br>GGAGGATGGACTTGTGGAAGCTGATTATGGATGTCCCTTTAATCCTGGA<br>AAATGCCATAGAAGTTGTATATACCTTGGATACAAAAGAAAGCAGTTGT<br>AAAGGAACGTTCAAGAAAACTGTGCTTGTATAGGCCTAAGGGTTGA                                                                     |
| TatHDPDef03                  | AIX87626.1           | 3 e-23  | PF01097     | 4099.64 | Defensin-like      | <u>AFCILEDELVEA</u> <u>GFGCPFNAGTCHNHCR</u> <b>SIGRRGGY</b><br><b>CSGTFRTTCVCYKS*</b>                                           | GCCTTCTGTATTTTGGAGGATGAGCTTGTGGAAGCTGGTTTGGATGTC<br>CCTTTAATGCTGGAACATGCCATAATCATTGATAGGAGCATGGACGCAG<br>AGGAGGGTATTGCAGCGGAACCTTCAGGACAACCTGCGTTTGTCTATAA<br>GAGT                                                                                                                |
| TatHDPDef04                  | AIX87626.1           | 1 e-17  | PF01097     | --      | Defensin-like      | <u>AFCILEDGIVEA</u> <u>EFGCPVDRKKCDRYCK</u> <b>SIGRSGGY</b><br><b>CGGISGTTICICYES</b>                                           | GCCTTCTGTATTTTGGAGGATGGGATTGTGGAAGCTGAATTTGGATGTC<br>CGGTGGATCGTAAAAAATGCGATAGATATTGTAAGAGCATTGGACGCA<br>GTGGAGGGTATTGCGGCGGAATCTCCGGGACAACCTGTATTTGCTATG<br>AGAGT                                                                                                                |
| ViVlp1                       | AGK88593.1           | 5 e-33  | PF08102     | 6158.03 | NDBP-2             | <u>MNGKALLVVFLVTMLVMEPT</u> <u>EAGIFSWVKAWNSG</u><br><b>VGKSLRKQAVKAAKNYVANKLGGTPEEAGAMPFD</b><br><b>EFMDVLHYN*</b>             | ATGAACGGAAAAAGCACTCCTCGTTGTTTCTTGGTTACCATGCTTGTA<br>TGGAGCCTACTGAAGCAGGAATTTTCTCATGGGTCAAGAAAGCATGGA<br>ACTCAGGTGTAGGCAAAATCACTAAGAAAAACAGGCTGTCAAAGCAGCA<br>AAAATTACGTAGCAAATAAATCTGGAGGAACGCCCGAGGAAGCTGGGA<br>GCAATGCCGTTTCGTGAATTTATGGATGTGCTGCATTATAACTAA                    |
| TatHDPND201                  | F1AWB0.1             | 7 e-52  | PF08102     | 6510.42 | NDBP-2             | <u>MNAKTIFAIFLIGMLVTEQ</u> <u>AEAGIWS</u> <b>TIKKYASKAW</b><br><b>NSDIGKSLRNKAAGAINKFVADKIGVTPSQAASMTL</b><br><b>DQIVDAMYD*</b> | ATGAATGCAAAAACCATCTTCGCTATTTTCTTGATTGGGATGCTCGTGA<br>CTGAACAAGCAGAGAAGCAGGAATCTGGAGTACAATTAAGAAATATGCTT<br>CAAAAGCATGGAATTCGACATAGGCAAAATCTCTAAGAAACAAGGCAG<br>CTGGCGGTATCAACAAATTTGTGGCAGATAAAAATAGGTGTAACACCTT<br>CACAAGCAGCCTCTATGACCCCTTGATCAAATAGTAGATGCTATGTATTA<br>CGATTAA |
| TatHDPND301                  | ALG64974.1           | 1 e-44  | N/D         | 2070.59 | NDBP-3             | <u>MKLVLNVPVFFVLIIHVVDYCHSLPFFLLSLVPTAISAI</u><br><b>KKL</b> <u>GKRNVESQRYVDLKRRLDEDLQALQDLLDQLSED</u><br><b>*</b>              | ATGAAGCTGGTTAATTTGGTTCCAGTTTCTTCTTGTCTGATAATAGTTGT<br>TGATTACTGCCATTCCTCTCTTTTTCCTTCTGAGTCTCGTACCTACAG<br>CAATCTCAGCAATCAAGAACTTGGCAAACGAAACGTAGAATCCCAAC<br>GTTATGTGGATCTTAAGAGACGTGATCTAGATGAAGATCTGCAAGCTCT<br>GCAGGATTTACTCGACCAGCTGTCTGAGGATTAG                              |
| ViAMP1                       | ALG64975.1           | 1 e-52  | N/D         | 2509.97 | NDBP-3             | <u>MQLRKALLVIFVAYLLVTDEAEAFWGFLGKLAMKA</u><br><b>IPSLIGGNKSSSKRKREIEDLFD</b> <u>PYQKDLDLQRLDRFFS</u><br><b>QFQ*</b>             | ATGCAGCTCAGAAAAGCACTGTTGGTAATCTTTGTGGCTTATCTCTTAG<br>TGACCGATGAAGCAGAAAGCTTCTGGGGATTCTCGGGTAAACTTGCAA<br>TGAAGGCCATCCCATCGTTAATTGGAGGAAACAAAAGTTTCATCAAGGA<br>GAAAGCGTGAAATTGAAGATTTATTCGACCCATACCAAAAAGACTTAG<br>ATCTGCAACGGTTAGATCGTTTCTCTCCCAAGTTCCAGTAG                       |
| ViCT2                        | I0DEB3.1             | 1 e-32  | N/D         | 1461.71 | NDBP-4             | <u>MKTQLVVLIVLALVFMQLFAQSHAFWGAVWNAAKSI</u><br><b>L</b> <u>GKRGLRNLDDLDQFDDSFEP</u> <u>ELSEADLKYLEDLLR*</u>                     | ATGAAAACCTCAGCTTGTAGTCCTGATCGTAGCTCTGTATTTCATGCAAC<br>TGTTTGCTCAGTCACATGCTTCTTGGGGTGAGTTTGGAAATGCAGCAA<br>GTCAATATTAGGGAAGAGAGGTCTCCGAAATTTGGATGATTTGGATCA<br>ATTTGATGATAGCTTTGAGCCTGAACGTGCAGAAGCTGATCTAAATAT<br>TTGGAAGATCTGCTCCGATAG                                           |
| ViCT7                        | I0DEB5.1             | 7 e-27  | N/D         | 1503.77 | NDBP-4             | <u>AFLKGHIDTVSNWL</u> <u>GKRSLKNLDQYNDLFDGEISDADI</u><br><b>NFLRNLMR</b>                                                        | GCATTTCTTAAGGGAATCATTGATACTGTGAGCAACTGGCTTGGGAAAC<br>GAAGTTTGAAGAATCTAGACCAATACAATGATTTATTCGATGGTGAAA<br>TATCCGATGCTGATATCAACTTCTAAGGAATTTGATGCGATGA                                                                                                                              |

| TatHDPND401       | I0DEB5.1             | 8 e-42  | N/D         | 1487.87  | NDBP-4               | <u>MKTQIVILIVAVLFLQLVSQSDAFLKGHIDTVGKWLGRGLKNLDQYNLDFDGEISDADIKYLQDLMR*</u>                                                                  | ATGAAGACCCCAAATTGTAATTTTGATAGTTGCAGTACTATTTCCTTCAATGGTCTCCCAATCAGATGCATTTCCTTAAGGGAATCATTTGACACTGTGGGCAAGTGGCTTGGAAAACGAGGCCCTTAAGAACCTAGATCAATACAATGATCTTTTGTATGGAGAAATATCTGATGCTGATATCAAGTATTTGCAAGATTGATGCGCTGA                                                                                                                                                                                              |
|-------------------|----------------------|---------|-------------|----------|----------------------|----------------------------------------------------------------------------------------------------------------------------------------------|-----------------------------------------------------------------------------------------------------------------------------------------------------------------------------------------------------------------------------------------------------------------------------------------------------------------------------------------------------------------------------------------------------------------|
| TatHDPND402       | I0DEB5.1             | 2 e-41  | N/D         | 1487.87  | NDBP-4               | <u>MKTQIVILIVAMLFLQLVSQSDAFLKGHIDTVGKWLGRGLKNLDQYNLDFDGEISDADIKYLQDLMR*</u>                                                                  | ATGAAGACCCCAAATCGTGATTTTGATAGTTGGCAATGTTATTTCCTTCAATGGTTCCTCAATCAGATGCATTTCCTTAAGGGAATCATTTGACACTGTGGGCAAGTGGCTTGGAAAACGAGGCCCTTAAGAACCTAGATCAATACAATGATCTTTTGTATGGAGAAATATCTGATGCTGATATCAAGTATTTGCAAGATTGATGCGCTGA                                                                                                                                                                                             |
| TatHDPND403       | I0DEB3.1             | 2 e-24  | N/D         | 1475.83  | NDBP-4               | <u>MKNQFAVLLVALVLLQLFSQSEGSFWNTLLSVGKSLLGKRGLRNFDFDQLDDTYEPELSEADLRYL*</u>                                                                   | ATGAAGAACCAATTTGCAGTTCTCCTCGTAGCTCTTGTTCTCTTACAACGTGTTTCTCAATCAGAAGGATCCTTCTGGAACACACTTCTAAGTGTGGGAAAGTCCTTACTGGGGAAGAGAGGCTCTCAGAAATTTGATTTTGATCAGCTGGATGACACCTATGAGCCGAATTGTGAGAAGCTGATCTTAGGTACCTTCAAGACTTGCTACGT                                                                                                                                                                                            |
| TatHDPND404       | I0DEB3.1             | 2 e-27  | N/D         | 1313.81  | NDBP-4               | <u>MKNQFVILIIHAVVLLQLISQSEALWGTLGLGSTLLSKLGKRGTQNLDAQFDDIFEPELSEADLRYLQDLLR*</u>                                                             | ATGAAGAACCAATTTGTCATCCTGATCATTGCCGTTGTACTCCTACAATTGATTTCTCAGTCAGAAGCCCTCTGGGGTACACTTTTAGGTTTGGGGAGTACCTTACTGAGCAAATTAAGGAAAGAGAGGTACCCAAAACCTTGGATCATTCGATGATATCTTTGAGCCCGAATTGTGAGAAGCTGATCTTAGGTATTTACAAGACCTTCTGCGA                                                                                                                                                                                          |
| TatHDPND405       | I0DEB3.1             | 6 e-29  | N/D         | 1283.8   | NDBP-4               | <u>MKTQFVILIIHAVVLLQLISQSEALWGALLGLGSTLLSKLGKRGTQNLDAQFDDIFEPELSEADLRYLQDLLR*</u>                                                            | ATGAAGACCCAAATTTGTCATCCTGATCATTGCCGTTGTACTCCTACAATTGATTTCTCAATCAGAAGCCCTCTGGGGTGCACCTTTTAGGTTTGGGAAGTACCTTACTGAGCAAATTAGGAAAGAGAGGTACCCAAAACCTTGGATCATTCGATGATATCTTTGAGCCCGAATTGTGAGAAGCTGATCTTAGGTATTTACAAGACCTTCTGCGATAA                                                                                                                                                                                      |
| TatHDPAni01       | AOF40247.1           | 8 e-10  | N/D         | 5893.99  | Anionic peptide      | <u>MVSRTLIFLMIVALLATFTSSYGFPAQNMDDDDDSFDDLFDYDDADDDSFDLDLDPADLAMLMDFANLFDSDSS*</u>                                                           | ATGGTATCAAGGACTCTCATTTTCTGATGATAGTGGCTCTGTTAGCAAACACCTTTACTTTCATCTTATGGCTTCCCAGCTCAAAATATGGATGATGATGACTCGTTTGATGACTTGTGTTGATGACTATGACGACCGCATGATGACTCCTTTGATCTAGACCTGGATCCTGCTGACCTAGCGATGCTGGACA TGTTTGCAAATCTATTTGACAGCGACAGTTCTTAA                                                                                                                                                                           |
| TatHDPWap01       | XP_015928629.1       | 7 e-47  | PF00095     | 12082.96 | Putative waprin-like | <u>MYAPQLFLLVAITVWGSAAEGGSRPFPFGPRRRLPGQRASGCVDCATELKQCVQKCLQQHDCSEMDVKEGFPCAGSPRPEKCPVSAVLSVCENDTDCPGTKKCCENGCSRICANALPVPSAIRQSKRTPKLG*</u> | ATGTACGCTCCACAACCTTTTCTACTCGTAGCTATTACAGTATGGGGTCCGCTGAGGGTGGCAGTCGCCCTTTTCCTTTCCGGTCCAAGACGTAGGATCCTACCTGGACAAAAGAGCATCAGGATGCGTGGATTGCGCAACGGAATTAAAGCAGTGTGTCCAGAAATGTCTCCAGCAACATGACTGCTCAGAAATGGACGTTAAAGAAGGCTTCTGCCAGCTGGATACCTAGACCAGAGAAATGCCCAGTGAGTGTCTGTTCTTTCAGTATGCGAAAAACGACCCGACTGCCAGGTACTAAGAAATGCTGCGAAAAATGGATGCTCAAGGATCTGCGCA AATGCACCTTCCGGTTCCATCAGCTATCCGACAGTCGAAGAGAACTCCA AAATTAGGT |
| La1-like peptides |                      |         |             |          |                      |                                                                                                                                              |                                                                                                                                                                                                                                                                                                                                                                                                                 |
| ID                | ID/Reference protein | e-value | PFAM domain | MW (Da)  | Sub-classification   | Amino acid sequence                                                                                                                          | Nucleotide sequence                                                                                                                                                                                                                                                                                                                                                                                             |
| ViLa1lp1          | AOF40216.1           | 3 e-43  | PF15430     | 8728.18  | Other                | <u>MRHLCVVALFGCLSLCTLFSFSKGVGEICQVGSMSINV GKQMOPKSCVIYECVEQNYRILLSKMSCSPQVPKRGCRNVPGPVDAPFPDCCPTSLCRGKQWDE*</u>                              | ATGAGGCATTTGTGCGTAGTTGCTCTTTTGGTTGTTATCATTATGC ACTCTTTCTCTTTTCAAAAAGGAGTTGGAGAAATTTGCCAAGTGGG GAGCATGTCAATAAATGTTGGAAAAAAGATGCAAGATCCTAAAAGC TGGCTCATTTATGAATGTGTTGAGCAAAACTATAGAATACTTCTCAG TAAATGAGTTGTTCTCCCAAGTACCAAAACGTGGATGCAGAAATG TGCTGGTCCAGTTGATGCTCCATTCCTGACTGCTGTCCCACGCTCTC TTGCCGAGGAAAAACAATGGGATGAATAA                                                                                        |
| TatOthLa101       | AOF40202.1           | 3 e-43  | PF15430     | 8260.58  | Other                | <u>MENKFTCLLLGSLLMFSCFSLSAGFGETCQAGGKYNV RVGQPIQDPNSCVLYKCLNYNRRYVLQTLSCATQTLKSGCRFAAAAPGTPFPNCCPMVICKGSG*</u>                               | ATGGAGAACAAAATTCACGTGTCTGTTATTGGGCAGTTTGCTAATGTTT TCTTTTGTTCGTTATCTGCTGGATTGGAGAAACCTGTCAAGCAGGG GGAAGATATAATGTTCCGGTGGTGCAGCCGATACAAGATCCAATTC ATGTGTTCTGTATAAATGTCTTAATTATAACCGGAGATATGTGCTTCA AACATTAAAGTTGCGCTACTCAGACATTGAAAAGTGGATGTCGTTTGT CTGCTGCAGCCCCAGGAACACCAATTCCTAACTGTTGTCCCATGGTG ATTTGCAAGGAAGTGTTAA                                                                                           |
| TatOthLa102       | API81329.1           | 3 e-14  | PF15430     | --       | Other                | GEEKQHPNSCALYRCERYLSRIVLYKLIQANQTMKSGCRLAAAAGRTPFPNC                                                                                         | GGGGAAGAAAAACAACATCCTAACTCATGTGCATTGTATAGATGCG AAAGATATCTTTCAAGGATTGTCTTTATAAACTGATTTGCGCAAAATC AGACAATGAAAAGTGGATGTCGACTTGCTGCTGCAGCTGGAAGAAC ACCATTTCCTAACTGT                                                                                                                                                                                                                                                 |

| TatOthLa103    | ADY39631.1           | 3 e-6   | PF15430     | 8693.97 | Other              | <u>MNTTWIVVFVFLGLVLAATA</u> <b>SHKDPYIRTCPIGDKDIS<br/>NGEEWADQKRCVKYKCQVRGPDAAALLITRCPSVGV<br/>YPTDKCREVPKGDFPTCCPKLQCD*</b>                                                                                                                                                             | TGAGATATGAACACCACTTGGATCGTTGTCTTCGTTTTCCTTGGCTTG<br>GTACTAGCTGCTACAGCCAGCCACAAAGATCCCTACATCAGAACTTG<br>CCCGATTGGTGACAAGGATATTAGCAATGGAGAAGAATGGGCTGAT<br>CAAAAACGCTGCGTGAAATATAAATGTCAAGTGCGTGGACCAGATG<br>CTGCTCTGCTTATAACAAGATGCCCATCAGTTGGAGTATATCCAACA<br>GACAAATGCAGAGAGGTTCCCGGAAAAGGTGACTTCCCACTTGCTG<br>TCCAAAACCTGCAGTGCAGACTGA                                                                                                                                                                                                                                                                                                                                                                                                                                                                                |
|----------------|----------------------|---------|-------------|---------|--------------------|------------------------------------------------------------------------------------------------------------------------------------------------------------------------------------------------------------------------------------------------------------------------------------------|-------------------------------------------------------------------------------------------------------------------------------------------------------------------------------------------------------------------------------------------------------------------------------------------------------------------------------------------------------------------------------------------------------------------------------------------------------------------------------------------------------------------------------------------------------------------------------------------------------------------------------------------------------------------------------------------------------------------------------------------------------------------------------------------------------------------------|
| TatOthLa104    | ADY39631.1           | 4 e-5   | PF15430     | 8762.05 | Other              | <u>MNTTWIVVFVFLGLVLAATA</u> <b>QHRDPYIRTCPIGDKDIS<br/>NGNEWADQKRCVKYKCQVRGPDASLLIIRCPSVGVY<br/>PTDKCREVPKGDFPSCCPKLQCD*</b>                                                                                                                                                              | ATGAACACCACTTGGATCGTTGTCTTCGTTTTCCTTGGCTTGGTACTA<br>GCTGCTACAGCCCAGCACAGAGATCCTTACATCAGAAGTTGCCCGAT<br>TGGTGACAAGGATATTAGTAATGGGAATGAATGGGCTGATCAAAAA<br>CGCTGCGTGAAATATAAATGTCAAGTGCGTGGACCAGATGCCTCTCT<br>ACTTATAATAAGATGCCCATCAGTAGGAGTATATCCAACAGACAAAT<br>GTAGAGAGGTTCCCGGTAAAGGTGATTTTCCCTCTTGCTGCCAAAAA<br>CTGCAGTGCAGCTAA                                                                                                                                                                                                                                                                                                                                                                                                                                                                                       |
| TatOthLa105    | LOGCW8.1             | 2 e-24  | PF15430     | 9112.04 | Other              | <u>MKVWNTILCIWLLVVLNVSEVVVEGYTYVVNQKEGA<br/>VVCTDELGVEHQPGDQWFNDENCEMLLCDNATENL<br/>VIGALGCGSVYAPDCELKRSGSYPNCCPRPVC DGN<br/>DQ*</u>                                                                                                                                                     | ATGAAAGTCTGGAATACAATATTATGTATTTGGTTGTTAGTTGTACTT<br>AATGTTTCATTTCGTAGTTGTTGAAGGTATACGTATGTAGTGAATCAG<br>AAGGAAGGAGCAGTGGTTTGTACCGACGAATTAGGTGTTGAACACC<br>AACCAGGTGATCAGTGGTTCAATGATGAAAATTGCGAGATGTTTGCTT<br>TGTGATAATGCTACAGAAAAATTTGGTTATTGGAGCATTAGGTTGCCG<br>CAGTGTCTATGCCCTGATTGTGAATTAAGCGTGGTTCTGGTTCATA<br>TCCTAACTGCTGTCCAAGACCTGTTTGATGGGAATGATCAGTAA                                                                                                                                                                                                                                                                                                                                                                                                                                                        |
| TatOthLa106    | LOGCW8.1             | 4 e-22  | PF15430     | 9101.01 | Other              | <u>MKVWNTILCIWLLVVLNVSEVVVEGYTYVVNQKEGA<br/>VVCTDELGVEHQPGDQWFNDENCEMLLCDNATENL<br/>VIGALGCGSVYAPDCELKRSGSYPNCCLEPVC DGN<br/>DQ*</u>                                                                                                                                                     | ATGAAAGTCTGGAATACAATATTATGTATTTGGTTGTTAGTTGTACTT<br>AATGTTTCATTTCGTAGTTGTTGAAGGTATACGTATGTAGTGAATCAG<br>AAGGAAGGAGCAGTGGTTTGTACCGACGAATTAGGTGTTGAACACC<br>AACCAGGTGATCAGTGGTTCAATGATGAAAATTGCGAGATGTTTGCTT<br>TGTGATAATGCTACAGAAAAATTTGGTTATTGGAGCATTAGGTTGCCG<br>CAGTGTCTATGCCCTGATTGTGAATTAAGCGTGGTTCTGGTTCATA<br>TCCTAACTGCTGTCTAGAACCTGTTTGATGGAAATGATCAGTAA                                                                                                                                                                                                                                                                                                                                                                                                                                                        |
| Phospholipases |                      |         |             |         |                    |                                                                                                                                                                                                                                                                                          |                                                                                                                                                                                                                                                                                                                                                                                                                                                                                                                                                                                                                                                                                                                                                                                                                         |
| ID             | ID/Reference protein | e-value | PFAM domain | MW (Da) | Sub-classification | Amino acid Sequence                                                                                                                                                                                                                                                                      | Nucleotide sequence                                                                                                                                                                                                                                                                                                                                                                                                                                                                                                                                                                                                                                                                                                                                                                                                     |
| TatEnzPA201    | API81339.1           | 7 e-96  | PF05826     | 21335.9 | A2                 | <u>MEVAIHLALISAALAESIEKELYVNFELPGQRDGWPMTK<br/>AVRMQFMKRSENGRTLRLTFHGCQILQSLTDIAREVSILP<br/>KYAIRRISKQELESFQSRCEHVGEERTIWGTKWCG<br/>AGNESSGYEDLGIFYNVDSCCRHDHDCDSIPSGGTK<br/>YSLKNEGKFTMMNCECEDAFAKCLDKVVEGTSWYD<br/>YLATLGLIKSFKGVYFNLYNGCFHVKCNSGRSERR<br/>ALCANPTAEYTGESGFAKLLNG*</u> | ATGGAAGTAGCTATTATTCTAGCACTGATCTCTGCGGCCTTAGCAGA<br>GTCTATCGAGAAAGAGCTATATGTGAACCTCGAGCCATTGCCTGGCC<br>AGCGCGATGGTTGGCCAATGACGAAAGCAGTCCGTATGCAGTTTATG<br>AAAAGATCTGAAAATGGAAGAACACTCAGAACATTCCACGGATGCC<br>AAATACTTCAATCACTAACTGACATCGCAAGAGAAGTTAGCATCTTG<br>CCAAAGTATGCTATTAGAAGGATATCAAAACAAGAATTGGAATCATT<br>CCAAAGTAGGTGCGAACACGTAGGAGAGGAAGAAAGGACTATATGG<br>GGAACATAAGTGGTGCGGAGCAGGGAATGAATCAAGTGGCTATGAAG<br>ATTTAGGATATTTTATAATGTGGATAGCTGTTGCCGCGATCATGATC<br>ACTGCGATAGTATTCTTCAGGTGGAACAAAGTACAGTCTGAAGAAC<br>GAAGGGAAATTTACAATGATGAATTGCGAATGCGAAGACGCGTTTCG<br>CTAAATGTCTGGATAAAGTTGTAGAAGGGACAAGTTGGTACGATTAT<br>CTTGCTACCCTGGGATTGATTAAGTTTCAAGGGGTTTATTTCAAT<br>TTATATGGAAACGGATGTTTTCACGTAAAGTGCAACAGTGGACGATC<br>AGAAAGAAGGGCATTATGTGCCAACCAACTGCGGAGTACACTGGC<br>GAATCCGGATTTGCAAAATTACTTAACGGTTAG |

|             |            |        |         |       |    |                                                                                                                                                                                                                                                                                                                                                       |                                                                                                                                                                                                                                                                                                                                                                                                                                                                                                                                                                                                                                                                                                                                                                                                                                                                                                                                                                                                  |
|-------------|------------|--------|---------|-------|----|-------------------------------------------------------------------------------------------------------------------------------------------------------------------------------------------------------------------------------------------------------------------------------------------------------------------------------------------------------|--------------------------------------------------------------------------------------------------------------------------------------------------------------------------------------------------------------------------------------------------------------------------------------------------------------------------------------------------------------------------------------------------------------------------------------------------------------------------------------------------------------------------------------------------------------------------------------------------------------------------------------------------------------------------------------------------------------------------------------------------------------------------------------------------------------------------------------------------------------------------------------------------------------------------------------------------------------------------------------------------|
| TatEnzPA202 | API81335.1 | 7 e-73 | PF05826 | 22373 | A2 | <p><i>MTALFLTAFIALLATGRTRTVQRELYLNLESSPHQEDSWP</i><br/> <i>SVRAIIIVNSNERHEEGRTFSKCRMLNSTKEAAREVSKFP</i><br/> <b>QHLIKRVSKKEEMDNLERRCSGPLETRGFTDNFAFKG</b><br/> <b>TKWCGPGTMAENEDDLGPLEADKCCRAHDHCSIE</b><br/> <b>SGGFKYNLKNAYRTLNCCEEEAFDRCLQATADRV</b><br/> <b>EGTEKEETKMLRNYYFNILHVQCVRLYCRNGGPASE</b><br/> <b>NNCTDKFGVWMENYYEENFERKDITFY*</b></p> | <p>AGTTTATATATGGACCATAACTGCTATACATGTATGACTGCGTTATTT<br/> CTTACCGCATTTCATAGCGTTGTTAGCTACAGGCCGCACTCGCACTGTC<br/> CAAAGAGAACTCTATTTAAATCTGGAATCGTCACCTCATCAAGAAGA<br/> TTCGTGGCCATCTGTAAGAGCAATCATAGTTAATTCCAATGAGAGGC<br/> ACGAAGAAGGACGAACATTTTCTAAATGTAGGATGCTGAATTCACG<br/> AAAGAAGCAGCTAGAGAAGTATCTAAATTTCCACAACATTTGATAAA<br/> AAGAGTTTCCAAAGAAGAAATGGACAACTGGAGAGAAAGATGTCTCA<br/> GGGCCATTAGAAACAAGAGGATTTTACTGACAATTCGCACTCAAAGG<br/> AACAAATGGTGTGGCCCTGTGACGATGGCAGAAAATGAAGACGAT<br/> CTTGGACCTTTAGAAGCAGATAAAGTGCTGTCGCGCTCATGATCACTG<br/> TGACAGATTGAATCAGGAGGATTTAAGTATAACCTGAAGAACAATG<br/> CGTACCGTACTTTGTTGAATTGTGAATGTGAAGAAGCTTTCGATCGTT<br/> GCTTGCAGGCGACTGCAGATAGGGTAGAAGGTACTGAGAAAAGAAGA<br/> AATAAAATGCTTAGGAATTATTACTTTAATATTCTTCATGTTCACTG<br/> TTACCGTTTGTATTGTGCAAAATGGGGACCTGCCAGCGAAAACAACT<br/> GTACAGACAAATTTGGTGTGTGGATGGAAAATTATTACGAGGAGAA<br/> CTTTGAAAGAAAAGATATTACATTCTAT</p>                                                                              |
| TatEnzPA203 | Q3YAU5.1   | 2 e-20 | PF05826 | --    | A2 | <p>WTFYSPYFVYMLSRSGTKWCGAGNEATDENDLGLLYN<br/> VDSCCRDHDHCDNIASGETKYGLRNNNGKYTM</p>                                                                                                                                                                                                                                                                    | <p>TGGACCTTTTATAGTCCATATTTTGTTTATATGCTTTCTCGCTCAGGA<br/> ACAAAGTGGTGGGAGCTGGAACGAAGCCACTGATGAGAATGATC<br/> TAGGGTTATTGTACAACGTTGACAGCTGTGGCGTGACACGATCAC<br/> TGTGATAATATTGCGTCGGGTGAAACAAAGTATGGTTTGAGAAACAA<br/> TGGGAAATATACAATG</p>                                                                                                                                                                                                                                                                                                                                                                                                                                                                                                                                                                                                                                                                                                                                                          |
| TatEnzPA204 | KFM56793.1 | 4 e-30 | PF05826 | --    | A2 | <p>KKCRSLERKRRSLADLAKMVSLTTRKATDFVPYGNW<br/> CGIGGSGKVM DPIDKCCQVHDNICYLKARDKGICKAIVS<br/> LYLGKYNWKMENGEIVCSIPEDANACDEASCLCDKEVA<br/> ICLAKNIDSYQKDHRVYVRSLFKS</p>                                                                                                                                                                                   | <p>AAGAAATGCCGATCGTTAGAGAGGAAACGACGGAGTTTAGCAGATT<br/> TAGCAAAAATGGTTAGCTTAACTACCAAAAGGAAAGCAAGATTTT<br/> GTGCCATATGGAACCTGGTGTGGTATTGGCGGTAGTGTAAGTCAT<br/> GGACCCTATTGATAAATGCTGCCAAGTGATGATAATTGCTATTGTA<br/> AAGCACGCGATAAAGGGATATGCAAAAGCTATTGTGAGTCTTTATCTC<br/> GGAAAATACAATTGGAAGATGGAAAATGGAGAAAATTGTCTGCTCCA<br/> TACCAGAAGATGCGAATGCATGTGACGAAGCAAGTTGCCTCTGCGAT<br/> AAGGAAGTAGCAATATGTTTAGCAAAAAATATTGATAGCTATCAAA<br/> AAGACCATAGATACGTTAGATCATTGTTTAAGAGT</p>                                                                                                                                                                                                                                                                                                                                                                                                                                                                                                                     |
| TatEnzPA205 | KFM56793.1 | 5 e-31 | PF05826 | --    | A2 | <p>SQFSGSSDMYKFVFFIIVILASVCYQVNECRSLERKRRSL<br/> ADLAKMVSLTTRKATDFVPYGNWCGIGGSGKVM DPIDK<br/> DKCCQVHDNICYLKARDKGICKAIVSLYLGKYNWKMEN<br/> GEIVCSIPEDANACDEASCLCDKEVAICLAKNIDSYQKD<br/> HRYVRSLFKS</p>                                                                                                                                                 | <p>ATCACAAATTCAGTGGGTCCAGCGATATGTATTTAAAGTCTTTTCAT<br/> TATTGTAATATTGGCCTCAGTATGCTACCAAGTTAACGAATGCCGAT<br/> CGTTAGAGAGGAAACGACGGAGTTTAGCAGATTTAGCAAAAATGGT<br/> TAGCTTAACTACCAAAAGGAAAGCAACAGATTTTGTGCCATATGGAA<br/> ACTGGTGTGGTATTGGCGGTAGTGTGTAAGTCATGGACCCTATTGAT<br/> AAATGCTGCCAAGTGATGATAATTGCTATTTGAAAGCACGCGATAA<br/> AGGGATATGCAAAAGCTATTGTGAGTCTTATCTCGGAAAATACAATT<br/> GGAAGATGGAAAATGGAGAAAATTGTCTGCTCCATACCAAGAAGATGC<br/> GAATGCATGTGACGAAGCAAGTTGCCTCTGCGATAAGGAAGTAGCA<br/> ATATGTTTAGCAAAAATATTGATAGCTATCAAAAAGACCATAGATA<br/> CGTTAGATCATTGTTAAGAGT</p>                                                                                                                                                                                                                                                                                                                                                                                                                      |
| TatEnzPA206 | JAT91104.1 | 7 e-85 | PF05826 | --    | A2 | <p>MSKQTAMKTLLATILATLSLVDGGIFDAVDDVLPITTTF<br/> YREKDGHRMVETIEVNTYVSGKKTVDCYMYGDNYYIN<br/> KMVELIPTSIKEDVKEEMSDLVNQCSDLLLNELNSGVF<br/> HFVKSPFDSIRKAFKSLIFPGTKWCGAGNVADDYEDLG<br/> RAEDTDKCCRTHDHCDDTIPGFETKYGLKNKDFYTKST<br/> CDCDLTFHSCLYEGENLPSDLVGKVFFNILQTQCFKEDY<br/> PQVECLEKSGIPLIRESCQEYELDYNGTKKYQFFDAKSY<br/> ESKDNASILERILS</p>           | <p>ATGTCAAAGCAACCGCAATGAAGACTTTACTGGCAACAATTCTGGC<br/> AACACTTTCGTTAGTAGATGGTGGTATTTTCGATGCAGTAGACGATG<br/> TTCTTCCCATAAACCACAACCTTTTATCGAGAGAAAGATGGCCATAGA<br/> ATGGTTGAAACAATCGAAGTTAATACCTACGTAAGCGGAAAGAAAA<br/> CTGTGGATTGTTACATGTATGGAGATAATTACATTATCAACAAGATG<br/> GTAGAATTGATTCCAACAAGCATTACCAAGAAGTGGATAAGGAAG<br/> AAATGAGTGATTGGTAAATCAATGCAGCGACCTGTTATTGAATGAA<br/> CTGAACAGTGGCGTATTCATTTTGTTAAAGTCCTTTTGACTCCATT<br/> AGGAAAGCCTTCAAATCACTGCTGATATCCCTGGAACCTAAGTGGTG<br/> TGGAGCAGGTAATGTTGCTGATGATTATGAAGATTTGGGACGTGCTG<br/> AAGACACCGACAAGTGTGTGAAGACACATGACCATTGCGATGACACT<br/> ATACCTGGATTGAAACGAAATATGGTCTTAAAAACAAGGATTTTATA<br/> TACAAAGAGCACCTGTGATTGTGATCTGACATTTCATTCGTGTTTATA<br/> TGAAGGAGAGAACTGCCATCTGATTTAGTTGGTAAAGTATTTTCA<br/> ACATCCTTCAACACAATGCTTCAAGAGGATTATCCACAGGTGGAA<br/> TGCTTAGAAAAAAGCGGGATACCATTAATCAGAGAAAAGTTGTCAAG<br/> AATATGAAGTGGATTACAATGGAACAAAGAGTACCAATTCTTTGAT<br/> GCAAAAAGCTACGAATCTAAAGACAACGCCCTCAATTCTTGAAAGAA<br/> TACTGTCT</p> |



|             |            |        |         |    |    |                                                                                                                                                                                                                                                                                                                                                                                                                                                                                                                                                                                                                                                                                                                                                                                                                                                                                                                                                                                                                                                                                                                                                                                                                                                                                                                                                             |
|-------------|------------|--------|---------|----|----|-------------------------------------------------------------------------------------------------------------------------------------------------------------------------------------------------------------------------------------------------------------------------------------------------------------------------------------------------------------------------------------------------------------------------------------------------------------------------------------------------------------------------------------------------------------------------------------------------------------------------------------------------------------------------------------------------------------------------------------------------------------------------------------------------------------------------------------------------------------------------------------------------------------------------------------------------------------------------------------------------------------------------------------------------------------------------------------------------------------------------------------------------------------------------------------------------------------------------------------------------------------------------------------------------------------------------------------------------------------|
| TatEnzPA207 | API81338.1 | 2 e-74 | PF05826 | -- | A2 | <p>MQFIKRSEEGREFRRFHGCQILQSLNDIAREAYRTPRHS<br/>MKRISKEEMRSFESRCERIGVDERTVLGTKWCGAGNEA<br/>TDENDLGLLYNVDSCCRDHDHCDNIASGETKYGLRNN<br/>GKYTMMNCKCEDKFSACLESVIEKTNFLDYLPTLAAIK<br/>GFKAIYFDLYGNGCFNLTCSSGRSER</p> <p>ATGCAGTTTATAAAGAGATCAGAAGAAGGAAGAGAGTTTCAGAAGAT<br/>TCCATGGATGTCAGATACTTCAATCCTTAAATGACATTGCGAGAGAA<br/>GCATACAGAACCCCAAGACATTCTATGAAAAGAATATCAAAAAGAGG<br/>AAATGAGGTGCGTTTGAATCAAGATGTGAACGTATTGGAGTTGATGAA<br/>AGAACTGTACTTGGAACAAAGTGGTGGGAGCTGGAACGAAGCCA<br/>CTGATGAGAATGATCTAGGGTTATTGTACAACGTTGACAGCTGTTGTC<br/>CGTGACCACGATCACTGTGATAATATTGCGTCGGGTGAAACAAAGTA<br/>TGTTTGGAGAAACAATGGGAAATATACAATGATGAATTGCAAAATGTG<br/>AGGACAAGTTCTCTGCATGCTTGGAGTCAGTAATAGAAAAAACTAAT<br/>TTTCTTGATTATCTTCCAACTTTGCTGCAATTAAGGTTTCAAAGCT<br/>ATTTATTGATCTCTATGGTAACGGATGTTTTAATTTAACATGCAGC<br/>AGTGGGCGATCAGAGAGGTGA</p>                                                                                                                                                                                                                                                                                                                                                                                                                                                                                                                        |
| TatEnzPA208 | API81341.1 | 2 e-38 | PF05826 | -- | A2 | <p>MLSRSGTKWCGAGNEATDENDLGLLYNVDSCCRDHDH<br/>CDNIASGETKYGLRNNGKYTMMNCKCEDKFSACLESVI<br/>EKTNFLDYLPTLAAIKGFKAIYFDLYGNGCFNLTCSSGR<br/>SER</p> <p>ATGCTTTCTCGCTCAGGAACAAAGTGGTGGGAGCTGGAACGAAG<br/>CCACTGATGAGAATGATCTAGGGTTATTGTACAACGTTGACAGCTGT<br/>TGCCGTGACCACGATCACTGTGATAATTGCGTCGGGTGAAACAAA<br/>GTATGGTTTGGAGAAACAATGGGAAATATACAATGATGAATTGCAAA<br/>GTGAGGACAAAGTTCTCTGCATGCTTGGAGTCAGTAATAGAAAAAACT<br/>AATTTTCTTGATTATCTTCCAACTTTGCTGCAATTAAGGTTTCAA<br/>GCTATTTATTTTCGATCTCTATGGTAACGGATGTTTTAATTTAACATGC<br/>AGCAGTGGGCGATCAGAGAGGTGA</p>                                                                                                                                                                                                                                                                                                                                                                                                                                                                                                                                                                                                                                                                                                                                                                                                         |
| TatEnzPA209 | P0C8L9.1   | 1 e-82 | PF05826 | -- | A2 | <p>MQFIKRSEEGREFRRFHGCQILQSLNDIAREAYRTPRHS<br/>MKRISKEEMRSFESRCERIGVDERTVLGTKWCGAGNEA<br/>TDENDLGLLYNVDSCCRDHDHCDNIASGETKYGLRNN<br/>GKYTMMNCKCEDKFSACLESVIEKTNFLDYLPTLAAIK<br/>GFKAIYFDLYGNGCFNLTCSSGRSESNACPNPTAAYTG<br/>ESGAAKLINYLSG</p> <p>ATGCAGTTTATAAAGAGATCAGAAGAAGGAAGAGAGTTTCAGAAGAT<br/>TCCATGGATGTCAGATACTTCAATCCTTAAATGACATTGCGAGAGAA<br/>GCATACAGAACCCCAAGACATTCTATGAAAAGAATATCAAAAAGAGG<br/>AAATGAGGTGCGTTTGAATCAAGATGTGAACGTATTGGAGTTGATGAA<br/>AGAACTGTACTTGGAACAAAGTGGTGGGAGCTGGAACGAAGCCA<br/>CTGATGAGAATGATCTAGGGTTATTGTACAACGTTGACAGCTGTTGTC<br/>CGTGACCACGATCACTGTGATAATATTGCGTCGGGTGAAACAAAGTA<br/>TGTTTGGAGAAACAATGGGAAATATACAATGATGAATTGCAAAATGTG<br/>AGGACAAGTTCTCTGCATGCTTGGAGTCAGTAATAGAAAAAACTAAT<br/>TTTCTTGATTATCTTCCAACTTTGCTGCAATTAAGGTTTCAAAGCT<br/>ATTTATTGATCTCTATGGTAACGGATGTTTTAATTTAACATGCAGC<br/>AGTGGGCGATCAGAGACCAACGCCAAATGCCCAATCCAACAGCAG<br/>CATACACTGGTGAATCTGGAGCTGCAAAATTAATTAATTATCTTAGT<br/>GGTTAA</p>                                                                                                                                                                                                                                                                                                                                                                                                   |
| TatEnzPA210 | JAT91104.1 | 7 e-94 | PF05826 | -- | A2 | <p>MKVAAAVIFALTFVFAKCGIFDIADKLLPITTFYREKDG<br/>HRMVETIEINTYIGGKKLVDCYLYGHVYIIDKMMEVVPP<br/>DIVKEVGKKKMSKLVNTCSDLHVTCLRKGIFDIKSPFD<br/>FARKLFKSLLIFPGTKWCGAGDVADDYDDLGVYEDTD<br/>KCCRTHDHCNDSIVGFETKYDLKNKDFYTKSSCDCDLP<br/>FHECLYQKEAIHSDAVGHLFFNILQTQCFKEEYPIVKCL<br/>KKWGIPLIRESCQKYELDYNGTKKHQFFDAKMYKGKN<br/>ESPFLKQLLSH</p> <p>CATATCACTACTAGCATATATAGGGTGATTATATTGTTATTTTTATTG<br/>CAGCAGAAAAATGAAGGTAGCAGCGGCTGTTATTTTCGCGTTAACTTT<br/>CGTTTTCGCGAAGTGTGGGATATTGACATTGCGGACAAACTTCTCC<br/>CCATTACCACAACCTTCTATCGAGAGAAAAGATGGACACAGAATGGTT<br/>GAAACTATCGAAATTAATACTTACATCGGTGGGAGAAACTGGTTGA<br/>TTGTTACTTGATGGACATGTGTACATTATTGACAAAATGATGGAAG<br/>TGGTTCTCCGATATTGTAAAAGAAGTAGGTAAAAAGAAAAATGAGT<br/>AAATTGGTCAATACGTGCAGCGATTTACACGTAACTAACTCCGAAA<br/>GGGGATTTTGACATTATTAAGAGCCCATTCGACTTTGCCAGGAAGC<br/>TTTTCAAATCGCTTCTATATTTCTGGTACTAAGTGGTGTGGAGCAG<br/>GTGACGTAGCTGATGACTACGATGACCTTGGAGTATATGAAGACACT<br/>GATAAATGTTGTAGAACCCACGATCATTGCAACGATAGTATTGTTGG<br/>ATTGAAACCAAAATATGATCTTAAGAATAAGGATTTTATACAAAGA<br/>GCAGTTGTGACTGTGACTTGCCATTCCACGAATGCTTATATCAGAAA<br/>GAAGCGATACATTAGACGCGGTTGGGCATCTATTTTAAACATTCT<br/>GCAAAACACAGTGTTTTAAAGAGGAGTATCCGATAGTAAAGTGTAA<br/>AGAAATGGGGGATACCACTAATAAGGAATCTTGCCAGAAGTATGA<br/>GTTGGATTACACGGGACGAAGAAACACCAGTCTCTCGATGCGAAG<br/>ATGTATAAAGGAAGAATGAATCTCCGTTTCTTAAGCAGTTATTGTC<br/>ACAT</p> |

|             |            |        |         |         |    |                                                                                                                                                                                                                                                                                                 |                                                                                                                                                                                                                                                                                                                                                                                                                                                                                                                                                                                                                                                                                                                                                                                                                                                                  |
|-------------|------------|--------|---------|---------|----|-------------------------------------------------------------------------------------------------------------------------------------------------------------------------------------------------------------------------------------------------------------------------------------------------|------------------------------------------------------------------------------------------------------------------------------------------------------------------------------------------------------------------------------------------------------------------------------------------------------------------------------------------------------------------------------------------------------------------------------------------------------------------------------------------------------------------------------------------------------------------------------------------------------------------------------------------------------------------------------------------------------------------------------------------------------------------------------------------------------------------------------------------------------------------|
| TatEnzPA211 | JAT95961.1 | 8 e-39 | PF05826 | --      | A2 | <p>IRYRLTLYTLWTPLNTTEMTYKGHQMLLLILTAFLSFVQ<br/>PLPSAVIELPHENKLTGYYSQSEKNPYMLIIGQTGKVIHCH<br/>QYEDRNEAKRVLAALHLEDVERVTPQKMDDLKFCFE<br/>EERIEHPKKDVKKVFIYPGTKWCGMGDDAANENELGK<br/>EKEADSCCRDHDHCKDSIPAFSIKHNLTNYSPTKSHCS<br/>CDREFHLCLAKAGTEAAKIISGLYFNMLKMECFQTTNCS<br/>SSNETCVKWTWQWTLSSSYI</p> | <p>TGCCACCATTTCCAACAGTCGTTCTTTAGTAGACTGCATTACATCCTT<br/>AAGGGCCATCAGATGTTGCTTCTCATACTAACAGCTTTCTTATCATTT<br/>GTACAACCTTTGCCATCCGCTGTTATAGAATTACCGCACGAAAAACA<br/>GTTAACTGGATACTACCAAAGTGAAAAAATCCTTATATGTTGATTA<br/>TTGGACAAACAGGAAAAAGTAATACACTGCCATCAGTATGAAGACAG<br/>GAATGAGGCTAAAAGAGTGCTGGCAGCTTTGCATTGGGAAGATGTGG<br/>AAAGAGTAACACCTCAAAAAATGGACGATCTATTAAGTTTTGTACT<br/>GAGGAAGAACGTATAGAGCATCCTAAAAAAGATGTAAGAAGGAT<br/>TTATTTATCCAGGCACTAAATGGTGTGGAATGGGAGACGATGCAGCT<br/>AATGAAAAATGAATTGGGTAAGAGAAAGAAGCTGATTCTTGTTGTGCG<br/>TGATCAGCATCATTTGAAAGATTCAATCCCTGCATTCAGCATTAAC<br/>ATAATCTAACGAACATTCCACCTTCACTAAGAGCCACTGCAGTTGT<br/>GACAGAGAATTTTCATCTTTGTTTAGCCAAGGCAGGAAGTGAAGCAGC<br/>TAAAAATAATTCAGGTTTTATATTTCAATATGTTAAAAATGGAGTGTTT<br/>CCAAACGACAAAACCTGCAGCAGTTCCAACGAAACCTGTGTCAAAACCTT<br/>GGCAATGGACTTTATCCAGCTCTTATATC</p>               |
| TatEnzPA212 | JAT95961.1 | 8 e-39 | PF05826 | --      | A2 | <p>IRYRLTLYTLWTPLNTTEMTYKGHQMLLLILTAFLSFVQ<br/>PLPSAVIELPHENKLTGYYSQSEKNPYMLIIGQTGKVIHCH<br/>QYEDRNEAKRVLAALHLEDVERVTPQKMDDLKFCFE<br/>EERIEHPKKDVKKVFIYPGTKWCGMGDDAANENELGK<br/>EKEADSCCRDHDHCKDSIPAFSIKHNLTNYSPTKSHCS<br/>CDREFHLCLAKAGTEAAKIISGLYFNMLKMECFQTTNCS<br/>SSNETCVKWTWQWTLSSSYI</p> | <p>ATACGCTACAGACTAACATTATACACATTATGGACTCCCCTGAATAC<br/>AACAGAGATGACCTACAAGGGCCATCAGATGTTGCTTCTCATACTAA<br/>CAGCTTTCTTATCATTTGTACAACCTTTGCCATCCGCTGTTATAGAAT<br/>TACCGCACGAAAAACAAGTTAACTGGATACTACCAAAGTGAAAAAAA<br/>TCCTTATATGTTGATTATTGGACAACAGGAAAAAGTAATACACTGCC<br/>ATCAGTATGAAGACAGGAATGAGGCTAAAAGAGTGCTGGCAGCTTT<br/>GCATTTGGGAAGATGTGGAAAGAGTAACACCTCAAAAAATGGACGAT<br/>CTATTAAGTTTTGTACTGAGGAAGAACGTATAGAGCATCCTAAAAA<br/>AGATGTAAGAAGGATTTTATTTATCCAGGCACTAAATGGTGTGGAA<br/>TGGGAGACGATGCAGCTAATGAAAAATGAATTGGGTAAAGAGAAAGA<br/>AGCTGATTCTTGTTGTGCGTGATCAGCATATTGTAAGATTCAATCCC<br/>TGCAATTCAGCATTAACATAATCTAACGAACATTCCACCTTCACTA<br/>AGAGCCACTGCAGTTGTGACAGAGAATTTTCATCTTTGTTTAGCCAAG<br/>GCAGGAAGTGAAGCAGCTAAAATAATTTCAAGGTTTATATTTCAATAT<br/>GTTAAAAATGGAGTGTTTCCAAACGACAACTGCAGCAGTTCCAACG<br/>AAACCTGTGTCAAAACCTGGCAATGGACTTTATCCAGCTCTTATATC</p> |
| TatEnzPA213 | API81335.1 | 4 e-76 | PF05826 | 23742.5 | A2 | <p><u>MYLAAFITILSLSCSYA</u>AERELHVNFDPPVVARAAIVN<br/>FDYNSETRREFSDCRMITSLEITREGLDLPEHLIKRV<br/>SKEEMDALEKRCSCGSAEMERFGMIYPGTKWCGPGNI<br/>SSSYSDLGELEADKCCRHDHCDSDIPAGQTKYGLSNT<br/>GEYTLMNCDCEKAFDSCLGDAADKEYLWNSMRTKT<br/>LRWTFYSAYSPKCYSVSCSAKRLDMEARCANGIGEW<br/>KSSYNV</p>                  | <p>ATGTATCTCGCTGCATTTATAACAATTTCTATCATTTGCTCTGCTCTTAT<br/>GCTGCCGAAAAGAGAACTCCATGTAATTTTGACCCTTGGCCCGTAGC<br/>AAGAGCCGCTATTGTGAATTTTGATTACAACCTCTGAAACGAGAAGAG<br/>AATTTTCTGACTGCCGATGATTACTTCGCTGGATGAGATCACTAGA<br/>GAAGGTCTGGATTTACCAGAACATTTGATAAAAAGGGTTTCAAAAGA<br/>AGAAATGGATGCCTTAGAGAAAAGATGCTCAGGTTCTGCAGAAATG<br/>GAACGATTTGGAATGATATATCCTGGAACAAAATGGTGCGGACCTGG<br/>AAACATTTCAAGCAGTTATTCTGATCTAGGAGAACTAGAAGCAGACA<br/>AATGTTGCCGTGATCAGACCACTGTGACAGCATTCAGCTGGTCAA<br/>ACTAAATATGGTCTTTCAAATACTGGCGAATATACATTAATGAACGTG<br/>CGACTGTGAAAAAGCCTTTGACTCCTGTTGGGAGATGCTGCTGATA<br/>AAGAATATTTATGGAATAGTATGAGGACTAAAACCTTAAGGTGGAC<br/>GTACTTCAGCGCTTATTCACCGAAATGTTACTCTGTAGTTGCTCCGC<br/>AAAGAGATTAGATATGGAGGCAAGATGTGCGAATGGGATTGGTGAA<br/>TGGAAGAGTAGTTACAACGTATAG</p>                                                                            |

|             |                |        |         |    |    |                                                                                                                                                                                                                                                                                                                                                                                                                                                                                                                                                                                                                                                                                                                                                                                                                                                                                                                                                                                                                                                                                                                                                                                                                                                                                                                      |
|-------------|----------------|--------|---------|----|----|----------------------------------------------------------------------------------------------------------------------------------------------------------------------------------------------------------------------------------------------------------------------------------------------------------------------------------------------------------------------------------------------------------------------------------------------------------------------------------------------------------------------------------------------------------------------------------------------------------------------------------------------------------------------------------------------------------------------------------------------------------------------------------------------------------------------------------------------------------------------------------------------------------------------------------------------------------------------------------------------------------------------------------------------------------------------------------------------------------------------------------------------------------------------------------------------------------------------------------------------------------------------------------------------------------------------|
| TatEnzPA214 | XP_015925461.1 | 7 e-51 | PF05826 | -- | A2 | <p>MMMTPLNLVLAMLSVVARSVSNEANGRFELTTTFYIEK<br/>DGHMVMEMVEGARYKGRSENVACYVYGDRYTIDRMM<br/>KFVEKNSMKDVTRAEMRELLNQCSSLNQPEKEEFRM<br/>KNPINYIKNITDKFGIFPGTKWCGSGNIAENDDDLGSSVE<br/>TDKCCRAHDKCND SIPANGTKHGLKNDGSYTKSN CNC<br/>DEEFYSCLKRVDKTSTAVGTTYFDILRTQCFKYEYPIIK<br/>CEKTC SILRRNCENYELNYNATKKYQFFDARCFL</p> <p>ATGATGATGACACCACTGAATCTGGTCTTGGCAATGTTGTCTGTAGT<br/>AGCGAGAAGTGTTTCTAACGAAGCTAATGGTAGGTTTGAATTAACCA<br/>CAACCTTCTATATAGAAAAGGATGGCCACAGAATGGTAGAAATGGT<br/>CGAAGGTGCTAGATACAAGGGCAGAAAGTGAACACGTTGCTTGCTAC<br/>GTTTATGGAGACAGATACACTATTGACAGAATGATGAAGTTTGTGTA<br/>AAAAATTCATGAAGGATGTAACCAAGCAGAAATGAGAGAATTG<br/>CTGAAATCAATGTAGTTCATTGAACCAACCGGAAAAAGAAATTCG<br/>CAGAATGAAAAATCCCATTAATTATATTAAGAATATTACTGATAAAT<br/>TTGGAATCTTTCCTGGTACTAAATGGTGCGGATCTGGGAATATAGCT<br/>GAGAATGACGACGATTGGGGCAGTTCAGTAGAAAACAGACAAATGCT<br/>GTAGGGCTCATGACAAATGTAATGATTCTATACCTGCCAATGGGAACA<br/>AAACATGGCCTTAAAAATGATGGATCTTATACTAAGAGTAATTGTAA<br/>TTGCGATGAAGAGTTTTACTCTGCTTGAAAAGGGTGGACGATAAAA<br/>CGTCTACAGCTGTCCGTACAACATATTTCGATATCTTGAGGACACAG<br/>TGCTTCAAATACGAATACCCCATAAATTAATGCGAGAAGACGTGTAG<br/>CATACTTAGAAGAACTGCGAGAATATGAGCTGAATTACAATGCA<br/>ACGAAGAAATACCAATTTTTTGACGCTAGATGCTTTTATAA</p>                                                                                                  |
| TatEnzPA215 | API81335.1     | 2 e-88 | PF05826 | -- | A2 | <p>MYLAVFTALLSLCCSRAAQRELYINFEPLPGQRDSWPIA<br/>RAAIVNFEEEKSEMGRFSGCRMISVDELAREGTDLPEH<br/>LIKRAKSEEMDALQERCSSGAEMERFTMIYPGTKWCGP<br/>GNKAKNESDLGSLEADKCCRAHDHCDNIGAGKSKYGL<br/>TNTGSFTLLNCDCENTFDRCLSDAAEKEGWFKKQGTKA<br/>LRWTFYFTA YSPKCYSLSCNKKRSILEARCANPVGWKE<br/>NYKL</p> <p>TGGATTTTGCAAGCACATCTTGGAACGCATCCATCTTTGAAGGGAAC<br/>AGACTTTCAGTCAATATGTATCTCGCAGTATTTACAGCACTTTTGTCT<br/>TTGTGCTGCTCTCGTGCTGCTCAAAGAGAACTTACATAAAATTTTGA<br/>ACCACTACCTGGTCAAAGAGATTCTTGGCCCATAGCAAGAGCCGCCA<br/>TTGTGAACCTTTGAGGAAAAATCCGAAATGGGAAGAGAATTTTCTGGA<br/>TGTGCGATGATCAGTTCGTAGATGAACCTGGCTAGAGAAGGAACGGA<br/>TTTGCCGGAGCATCTGATTAAGAGAGCTTCCAAAGAAAGAAATGGATG<br/>CTTTACAGGAAAGATGCTCGGGTCTGCGAAATGGAACGCTTCACA<br/>ATGATATATCCCGGAACAAAATGGTGTGGACCTGGTAACACGGCGA<br/>AAAACGAATCTGACCTCGGTAGCTTGGAAGCAGATAAATGTTGCCGC<br/>GCTCACGACCACTGTGATAATATTGGAGCTGGTAAATCTAAATATGG<br/>CCTAACAAAACACAGGAAGTTTACATTATTGAACTGTGATTGCGAAA<br/>ATACATTTGACAGATGTTTGAGTGATGCTGCTGAAAAGGAAGGTTGG<br/>TTTAAAAAACAGGGGCACAAAAGCATTGAGGTGGACGATTTCACCGC<br/>TTATTACCAAAAATGCTATTCACTCAGTTGCAATAAAAGAGATCTA<br/>TTCTGGAGGCTAGATGTGCTAATCCTGTGCGAAAGTGAAGGAAAAAC<br/>TATAAACTA</p>                                                                                                                                                       |
| TatEnzPA216 | XP_012232705.1 | 3 e-40 | PF05826 | -- | A2 | <p>MVVMIESGRTETPFCFRYGDRRTFQEIVKLIPKDIVKEVS<br/>KEEMTELLNKCSEFSFNELENAFRIQKRQIATYEEFLDL<br/>IKRILRFYSISSESIGTFLKSLADYISKNGVISPENPLLPFGT<br/>KWCGPGNRGENYNDLGIFSDTDACCRDHDNCNNSIKV<br/>GETKCNLTNNGLLTRMSCDCDDALYSCLKNSCNVISEL<br/>VGIMFFNVLNRNKCFEIEYPQVRCKKPCSTLLFLENCNEY<br/>ELDTTKEKKCQFFDPRCYYASQNCLLSTPNGTSPILLKIL<br/>LQLLGIN</p> <p>ATGGTTGTAATGATTGAAAGTGGCAGAACCGAAACACCTTTTGTCTT<br/>TCGTTATGGCGATAGGCGTACATTCAAGAAATTGTGAAGTTGATTC<br/>CAAAGGATATTGTAAAGGAAGTGAGCAAAGAAGAGATGACCGAATT<br/>ATTGAATAAATGTAGCGAATTTTCGTTCAACGAATTGGAAAATGAGG<br/>CTTTTCGCATCCAGAAAAGACAAATTGCTACCTACGAAGAGTTTTTG<br/>GATCTGATTAACGTATTCTTCGTTTTATTTCGATTCTGAGAGTTCA<br/>ATTGGAACGTTCTGGAAGAGTCTTGCCGACTACATTAGTAAAAATGG<br/>TGTATTAGTCCTGAAAATCCTTTGCTGTTTCCTGGAACATAATGGTG<br/>CGGACCTGGAAACAGAGGTGAAAATTACAACGATTGGGGATTTTTA<br/>GTGACACAGATGCATGCTGTAGGACCATGATAATTGCAATAACTCC<br/>ATAAAAGTAGGAGAAACGAAGTGCAATCTTACAAATAATGGACTTTT<br/>AACAAGGATGAGTTGTGATTGCGATGATGCGCTATACCTTTGTTTGA<br/>AAAACTCATGTAATGTGATATCTGAGCTTGTGGAAATAATGTTCTTCA<br/>ACGTTTTGAGAAACAAGTGCTTCGAAGAAGAATATCCACAAGTAGG<br/>TGTAAGAAACCGTGTAGCACACTTCTGTTCTGGAATAATTGCAATGA<br/>ATATGAATTGGATACTACTAAAGAAAAAGAAATGCCAATCTTTGATC<br/>CGAGATGCTACTATGCCTCTCAAAATGTTTGCTTTCCACTCCAATG<br/>GTACCTCACCAACCTTGTGAAAATATTGTTGCAACTATTAGGCATA<br/>AATGA</p> |

|             |                |        |         |         |          |                                                                                                                                                                                                                                                                                                                                                                                                                                                                                                                                                                                                                                                                                                                                                                                                                                                                                                                                                                                                                                                                                                                                                                                                                                                                                                                                                                                                                                                                                                                                                                                                                                                                                                                                                                                                                                                                                                                                                                                                                                                                                                                                                                                                                                                                                                                                                                                                                                                                                                                                                                                                                  |
|-------------|----------------|--------|---------|---------|----------|------------------------------------------------------------------------------------------------------------------------------------------------------------------------------------------------------------------------------------------------------------------------------------------------------------------------------------------------------------------------------------------------------------------------------------------------------------------------------------------------------------------------------------------------------------------------------------------------------------------------------------------------------------------------------------------------------------------------------------------------------------------------------------------------------------------------------------------------------------------------------------------------------------------------------------------------------------------------------------------------------------------------------------------------------------------------------------------------------------------------------------------------------------------------------------------------------------------------------------------------------------------------------------------------------------------------------------------------------------------------------------------------------------------------------------------------------------------------------------------------------------------------------------------------------------------------------------------------------------------------------------------------------------------------------------------------------------------------------------------------------------------------------------------------------------------------------------------------------------------------------------------------------------------------------------------------------------------------------------------------------------------------------------------------------------------------------------------------------------------------------------------------------------------------------------------------------------------------------------------------------------------------------------------------------------------------------------------------------------------------------------------------------------------------------------------------------------------------------------------------------------------------------------------------------------------------------------------------------------------|
| TatEnzPhB01 | XP_013790770.1 | 0      | PF04916 | 61028.7 | B-like 2 | <p>MECYVIIIFCLLPCLVMA<b>LPPRNVSVSWDSIKGDFS</b>IHD<b>T</b><br/>VVKDWVVAWASFSNEINSTGWSYLEVHTSEYYKDSY<b>Q</b><br/>AYAAGLVEGYVTS<b>DLIKKHWN</b>NLYADYCDGEKAYC<br/>DRLQQFLKINLDFLNDQISNNRTNAYWHQVALVLE<b>Q</b><br/>VKGLEDGYN<b>NKPSF</b>PTTRPSIFGPMFFNLFGDLE<b>DLE</b><br/>AVLNKTVKKRVLGSGHCSGLIKLLPGYKDLYVAQDS<br/>WNTYNSMLRILKKYVMPLKSSTSGSKRIAGSTMSFS<br/>SYPATIFSGDDFYIISR<b>LIALE</b>TTIGNSNSSLWKYVVP<br/>NKIVLEWIRNIVANRLARTGEAWTYLFSLYNSGTYN<b>N</b><br/>QWMVVVDYNRFFPGQSPRRGLLVWLEQLPGHIERKD<br/>QTHHLLKETYWPSYNSPFYPDIFNLSGTLD<b>MV</b>KKYG<br/>DWFTYDKTPRALIFKRDHKKVHDLASMMHLMRYND<br/>YKNDALSRCNCTPPYSAENIAAARSDLNPPNGTYPPFS<br/>LGHRS<b>HGAID</b>MKLTNYSMHMKYQFVAYGGPTYD<b>Q</b><br/>PPFQWSK<b>SDFGSE</b>HHDGHPDLWKFKPVVHKWLSDN<br/>*</p>                                                                                                                                                                                                                                                                                                                                                                                                                                                                                                                                                                                                                                                                                                                                                                                                                                                                                                                                                                                                                                                                                                                                                                                                                                                                                                                                                                                                                                                                                                                                                                                                                                                                                                                                                                                                                                                                 |
| TatEnzPhD01 | API81381.1     | 7 e-77 | N/D     | --      | D        | <p>QLFHHVNDNAFLSTGVISEGAKSQLWILLSLPYSTDSDF<br/>IIGFKQTLKVYGYQHMQHRVGWDMYGNERL<b>DVI</b>KKTY<br/>QKLGIS<b>TAV</b>WQGDGINNCLPRSGRRLKAIHKRDCDAE<br/>WTFLLKVVYV<b>W</b>VDKSSTMEALRMGVDAIL<b>TNR</b>PDKF<br/>YSALGDDEFST<b>THRLA</b>TIRDN<b>PWQKVRG</b>SKRSVYC</p>                                                                                                                                                                                                                                                                                                                                                                                                                                                                                                                                                                                                                                                                                                                                                                                                                                                                                                                                                                                                                                                                                                                                                                                                                                                                                                                                                                                                                                                                                                                                                                                                                                                                                                                                                                                                                                                                                                                                                                                                                                                                                                                                                                                                                                                                                                                                                    |
|             |                |        |         |         |          | <p>ATGGAGTGCTATGTGATAATTTTCTGTCTTCTGCCATGCTTGTAATG<br/>GCATTACCTCCAAGAAATGTATCAGTTTCATGGGATTCTATTAAAGG<br/>AGATTTCTCCATTTCATGACACAGTTGTAAAGGACTGGGTAGCTTGGG<br/>CTAGTTTTTCTAATGAAATAAAATAGTACTGGTTGGTCGTACTTAGAG<br/>GTTACACAAAGTGAATACTATAAGGATTCTTATCAAGCTTATGCTGC<br/>AGGGCTTGTGAGGGGATATGTAACATCTGATCTGATTA<b>AAAA</b>AGCATT<br/>GGAACAATTTATATGCTGACTATTGTGATGGAGAAAAGCATATTGT<br/>GATAGGTTGCAACAGTTTTTGAAGATAAAACCTGGATT<b>TTCT</b>GAA<b>TGA</b><br/>TCAAATTAGCAACAACAGAACAAATGCATACTGGCATCAGGTAGCTT<br/>TAGTGTGTGGAAACAAGTAAAAGGGTTGGAAAGATGGTTACAATAATAA<br/>ACCTTCCTTTTCCTACCACAAGACCAAGCATCTTTGGACCAATGTTTTT<br/>TAATTTGTTTGGTGATTTGGAAAGATTAGAAAGCTGTTCTTAACAAAAC<br/>AGTTAAAAAACGAGTATTAGGAAGTGGTCATTGCTCTGGATTAAATCA<br/>AACTTTTACCTGGATACAAAGATTATATGTTGCTCAAGATTCTATGG<br/>AATACATACAATTCTATGCTTCGTATTCTTA<b>AAAA</b>ATATGTTATGCCA<br/>CTTAAGTCTTCTACATCTACAGGTAGCAAGAGAATAGCTGGCAGCAC<br/>AATGAGCTTTTCTCTTATCCTGCCACAATATTTTCTGGTGATGATTG<br/>TTATATAAATATCAAGTAGACTGATTGCTCTTGAGACAACAATTGGTA<br/>ATAGTAATTCAAGTCTTTGGAAGTATGTTGTGCCAAACAAAATTGTG<br/>TTAGAGTGGATTAGAAATATTGTTGCCAACAGACTAGCAAGGACAG<br/>GTGAAGCTTGGACATACTTGTTCAGTCTTTACAATAGTGGAACTTAC<br/>AACAA<b>CCA</b>ATGGATGGTTGTTGATTACAATAGGTTTTTCTCGTGTC<br/>ATCTCCAAGGAGAGGTTTGCTTTGGGTTT<b>TAGA</b>ACAATTACCGGGAC<br/>ATATTGAACGTAAGGATCAGACACATCACCTTCTAAAGAGAAACATAT<br/>TGGCCATCATAACAAGTCCCTTTTATCCTGATATTTTCAATCTCAGT<br/>GGA<b>ACT</b>TTGGACATGGTGAAAAATATGGAGATTGGTTTACATATGA<br/>CAAA<b>ACT</b>CTCGTGCCCTCATTTTTAAAGGGATCATA<b>AAAA</b>AGTGC<br/>ATGATTGGCATCCATGATGCATCTGATGAGGTATAATGACTACAAA<br/>AAATGATGCCCTCTCAAGATGCAACTGCACTCCACCATACAGTGCTGA<br/>AAATGCAATTGCTGCAAGGAGTGACCTCAATCCACCAATGGAACTT<br/>ATCCATTCCATCCTTGGGGCATCGTTCTCATGGAGCTATTGACATGA<br/>AGCTTACAAATTATTCATGCATATGAAATACCAGTTTGTGGCATAT<br/>GGTGGACCTACTTATGACCAGCAACCACCCTTTCAGTGGAGCAAGTC<br/>TGATTTTGGTAGTGAACACCATGATGGTCATCTGATCTATGAAAT<br/>TCAAGCCTGTAGTT<b>CTA</b>AGTGGCTAAGTGACAA<b>T</b></p> <p>CAGCTTTTTACCATGTCAACGACAATGCTTTTCTATTAGTACCGGC<br/>GTTATTTCAGAGGGAGCCAAGTCACAGTTATGGATACTGCTGTCTTT<br/>GCCATATAGCACCGACTCCGATTTTATAATAGGGTTTAAGCAGACAC<br/>TGAAAGTATATGGTTACCAACATATGCAGCACAGGGTTGGATGGGAT<br/>ATGTATGGAAATGAAAGATTAGATGTAATCAAGAAGACGTACCAAAA<br/>AACTAGGAATTTCCACAGCAGTATGGCAGGGCGATGGGATCAACAA<br/>CTGCTTGCCTCGTTCCGGTAGGCGTTTGGCGAAAGCAATACACAAAA<br/>GAGATTGCGATGCAGAATGGACATTTCTCAAAAAGGTTTATTACTGG<br/>ACGGTAGACAAATCAAGTACCATGAAGGAAGCCCTAAGGATGGGAG<br/>TAGATGCAATCCTCACCAATCGCCCCGACAAGTTTTACTCGGCTCTA<br/>GGAGATGATGAATTTTCTACAACCCATCGATTGGCAACAATAAGAGA<br/>TAATCCATGGCAGAAAGTGGCAGGATCTAAAGATCAGTATATTGC</p> |

|             |                |        |     |    |   |                                                                                                                                                                                                                                                                                                                                                                                                                                                                                                                                                             |                                                                                                                                                                                                                                                                                                                                                                                                                                                                                                                                                                                                                                                                                                                                                                                                                                                                                                                                                                                                                                                                                                                                                                                                                                                                                                                                                                                                                                                                                                                                                                                                                                                     |
|-------------|----------------|--------|-----|----|---|-------------------------------------------------------------------------------------------------------------------------------------------------------------------------------------------------------------------------------------------------------------------------------------------------------------------------------------------------------------------------------------------------------------------------------------------------------------------------------------------------------------------------------------------------------------|-----------------------------------------------------------------------------------------------------------------------------------------------------------------------------------------------------------------------------------------------------------------------------------------------------------------------------------------------------------------------------------------------------------------------------------------------------------------------------------------------------------------------------------------------------------------------------------------------------------------------------------------------------------------------------------------------------------------------------------------------------------------------------------------------------------------------------------------------------------------------------------------------------------------------------------------------------------------------------------------------------------------------------------------------------------------------------------------------------------------------------------------------------------------------------------------------------------------------------------------------------------------------------------------------------------------------------------------------------------------------------------------------------------------------------------------------------------------------------------------------------------------------------------------------------------------------------------------------------------------------------------------------------|
| TatEnzPhD02 | API81381.1     | 0      | N/D | -- | D | <p>MSTTMLFYLVLPALFQILFSSAEVRPIWNIGHMVNSLSQID<br/> QFLNLGANALETDFTFNSDGVAEWYHGYPCDFRSCR<br/> RYATVEDYLRYVRELTSPPSPKFRSDFVLLQIDLKVSGL<br/> SDDATHNAGVDVAVKLIRYLWSGKGAKSQLWILLSFPY<br/> STDSDFVIGFMQTLRANGYQNMHQRVGVWDMSGNESLD<br/> VIKTTYQRLGVSRVWQSDGITNCLPRSIKRLLEAIHRR<br/> DWDAEWEFLDKVYYWTLKSSSMKQALRIGVDAIHTN<br/> HPDRFYSVLGDDEFSTTHRLATIRDNPWQKVRGAKRYL<br/> SQYTADVNYVFYECNLEETEKEDE</p>                                                                                                                                                             | <p>ATGGTAAATTCACCTCTCTCAAATTGATCAGTTCCTCAACCTAGGCGC<br/> AAATGCTTTGGAGACAGATTTACATTTAACAGTGACGGAGTCGCTG<br/> AATGGACGTACCATGGGTATCCCTGTGACTGTTTTAGAAGCTGCAGG<br/> CGATACGCGACAGTTGAAGATTATCTTCGTTATGTTAGAGAACTGAC<br/> TTCTCCAGACAGTCCCAAATTCGGTAGTGACTTTGTTCTGTTACAAAT<br/> TGACCTGAAAAGTCTCAGGATTGTGAGATGATGCGACACACAACGCTG<br/> GTGTAGATGTTGCTGTGAAACTATTAGGTATTGTGGAGCGGAAAG<br/> GGAGCCAAGTCACAATTGTGGATACTGCTGTCTTTCCATATAGCAC<br/> AGATTCGATTTCGTAATAGGGTTTATGCAGACACTGAGAGCAAAATG<br/> GTTACCAAAAATATGCACCAAGGGTGTGGATGGGATATGTCTGGCAAC<br/> GAAAGTTTAGATGTAATCAAGAAGACATATCAAAGATTAGGAGTTTC<br/> CAGAGCAGTATGGCAGAGCGATGGGATCACCAACTGTTTGGCCACGTT<br/> CCATTAACCGTTTGCTAGAAGCAATACACAGAAGAGACTGGGATGC<br/> AGAATGGGAATTTCTGGACAAGGTTTATTACTGGACGTTAGATAAAT<br/> CGAGTTCATGAAGCAAGCCCTAAGGATAGGAGTAGATGCAATCAT<br/> CACCAACCACCCTGACAGGTTTACTCGGTTCTGGGAGATGACGAAT<br/> TTTCTACAACCCATCGGTTAGCAACTATAAGAGACAATCCATGGCAG<br/> AAGGTACGAGGAGCTAAAAGATATCTCAGCCAGTACACTGCTGATGT<br/> TAACTATGTATTTATGAATGTAACTTGAAGAAGAAACCGAGAAGG<br/> AAGATATAGATGAA</p>                                                                                                                                                                                                                                                                                                                                                                                                                                                                                                                                                                                     |
| TatEnzPhD03 | XP_002399661.1 | 7 e-78 | N/D | -- | D | <p>KYLSQDLTYFIRYLKIIGVDKGISTFIMIENISLIHILLSSVV<br/> QVQGTEDRRHPVYIIAHMANSIHEVDDYLRRGANAIE<br/> ADVTFTSKGEVDSIYHGYPCDFRVCSEKKEFSKYISYIR<br/> NITTPGTKNYKENFTLLFLDLKVKNLIPQLKYAAGIKLT<br/> KALVKYLWNGGDNVTVINVLLSVGTTEDSQVIRAAKRT<br/> LQRDNLTYYLLPRIGFDVGMNDHPLKISNMWKSLSGMELN<br/> KWQGDGISNCVFPMRSTRRLDWLLRKQRDGESEYMSKI<br/> YQWTVDFSVHFRRYLGSGVEAFITNPERLSLLQESKI<br/> RQFYRLATINDNIWERVPIYPSVVRAEVTDTPISSNVYTI<br/> GQEVMDSLATFFTDAFSNTINRGVINSEYLSLMNYFADT<br/> NNDRSEPEQPDQDFCRYSLCLFYQLYSNQFTASRRLQFV<br/> TDCMQRSDSPFMEISTICRSLDKLVHNLFVSNVTSVA</p> | <p>AAGTATCTGTCCCAAGATTAAACATACTTCATCAGATACCTGAAAAT<br/> AATTGGAGTGGACAAAGGTATAAGCACTTTCATTATGATTGAAAACA<br/> TTTCGTTAATCATCATTCTTCTGTATCAGTTGTGCAAGTGCAGGGGA<br/> CAGAAGAAGATAGAAGGCATCCTGTTTACATCATTGCTCACATGGCG<br/> AACAGCATTCATGAAGTTGATGACTACCTACGTAGAGGAGCTAATGC<br/> TATCGAAGCAGATGTAACGTTTACTAGTAAAGGAGAGGTAGACTCA<br/> ATTTACCACGGATATCCTTGCGACTGCTTTCGTGTATGCTCGAGAAA<br/> AGAAAAATTTCTCCAAATATATTTCTTACATTCGTAATATTACAACACC<br/> AGGTACTAAAAAACTACAAGGAAAAATTTACACTATTATTTCTGGACC<br/> TAAAAGTAAAAAATTTGATTCCACAATTGAAATACGCTGCTGGAATA<br/> AAGCTCACTAAAGCGTTAGTAAAAATATCTATGGAATGGTGGCGATAA<br/> CGTCACTGTGATAAATGTTCTGTTATCCGTTGATACCAAGGAGATA<br/> GTCAAGTAATAAGAGCTGCAAAACGCACTCTTCAACGAGATAACTTA<br/> ACATATCTGCTTCCAAGAATAGGTTTCGATGTTGGGATGAACGATCA<br/> CCCACCTTAAGATTTCCAACATGTGGAAGAGTTTAGGAATGGAGCTGA<br/> ACAAATGGCAAGGTGATGGAATAAGCAATTGTGCTTTCCAATGAGA<br/> TCTACTAGGAGACTCGACTGGCTTCTAAGGAAACAAAGAGATGGAG<br/> AAAGTTACATGAGTAAAAATATATCAATGGACAGTGGAATTTCTCTGTA<br/> CATTTTCAGAAGATACCTTGGGTCAGGTGTAGAAGCGTTTCATACCAA<br/> TTATCTGAGAGATTAAGCAGTTTACTTCAAGAGTCGAAAATTCGTC<br/> AATTCTACAGACTAGCAACAATAAATGATAATATCTGGGAACCGCTG<br/> CCAATTTACCCCTCTGTTGTCAGAGCTGAAGTAACCGATACACCAAT<br/> CTCTTCTAACGTTTATACAATTTGGACAAGAAGTTATGGACTCCTTAGC<br/> AACCTTCTTTACCGATGCCTTTAGTAACACCATTAATCGAGGGGTTAT<br/> CAACTCAGAATATCTTTCATTGATGAATTACTTCGCGGACACTAACA<br/> ATGACAGATCAGAACCCTGAGCAACCAGATCCTCAAGACTTTTGTCCG<br/> TATTCATTGTGCCTCTTTTACCAACTATATAGTAATCAAACCTGCATCA<br/> CGCCGCTTGCAGTTTGTCACTGACTGTATGCAAAAGACGATTACACC<br/> ATTTATGGAATTTTCGACCATATGTAGGTCTCTAGACAACTAGTAC<br/> ATAATTTATTTGTATCTAATGTGACTTCAGTTGCA</p> |

| TatEnzPhD04    | XP_015792031.1       | 1 e-77  | N/D         | --      | D                  | KYLSQDLTYFIRYLKIIGVDKGISTFMIENISLIHLLSSVV<br>QVQGTEEDRRHPVYIIAHMANSIHEVDDYLRRGANAIE<br>ADVTFTSKGEVDSIYHGYPDCFRVCSRKEKFSKYISYIR<br>NITTPGTKNYKENFTLLFLDLKVKNLIPQLKYAAGIKLT<br>KALVKYLVNNGGDNVTVINVLVSVGTTEDSQVIRAAKRT<br>LQRDNLTLYLLPRIGFDVGMNDHPLKISNMWKSGLMELN<br>KWQGDGISNCVFPMRSTRRLDWLLRKQRDGESYMSKI<br>YQWTVDFSVHFRRYLGSQVEAFITNYPERLISVLQEKNI<br>RQHYRLATANDNPWETVPNYPTVISDQTANQPISSNVYS<br>IAQEAVESLMMFVGNVFNININRRISNSDIFTTIDYLVNG<br>YRSESELTEPEIFCQYALCTLYEIYSNQTIAYRFKLESKC<br>MQKSGTPGVEISTICKSLHKMVSPWPPII | AAGTATCTGTCCCAAGATTTAACATACCTTCATCAGATACCTGAAAAT<br>AATTGGAGTGGACAAAGGTATAAGCACTTTCATTATGATTGAAAACA<br>TTTCGTTAATCATCATTCTTCTGTCACTAGTTGTGCAGGTGCAGGGGA<br>CAGAAGAAGATAGAAGGCATCCTGTTTACATCATTGCTCACATGGCG<br>AACAGCATTCATGAAGTTGATGACTACCTACGTAGAGGAGCTAATGC<br>TATCGAAGCAGATGTAACGTTTACTAGTAAAGGAGAGGTAGACTCA<br>ATTTACCACGGATATCCTTGCGACTGCTTTCGTGTATGCTCGAGAAA<br>AGAAAAATTCTCCAAATATATTTCTTACATTTCGTAATATTACAACACC<br>AGGTACTAAAAACTACAAGGAAAAATTTTACACTATTATTTCTGGACC<br>TAAAAGTAAAAAATTTTGATTCCACAATTGAAATACGCTGCTGGAATA<br>AAGCTCACTAAAGCGTTAGTAAAAATCTATGGAATGGTGGCGATAA<br>CGTCACTGTGATAAATGTTCTGTATCCGTTGGTACCAAGGAGATA<br>GTCAAGTAATAAGAGCTGCAAAACGCACTCTTCAACGAGATAACTTA<br>ACATATCTGCTTCCAAGAATAGGTTTCGATGTTGGGATGAACGATCA<br>CCCACCTTAAGATTTCCAACATGTGGAAGAGTTTtaggaatggagctga<br>ACAAATGGCAAGGTGATGGAATAAGCAATTGTGTCTTCCAATGAGA<br>TCTACTAGGAGACTCGACTGGCTTCTAAGGAAACAAAGAGATGGAG<br>AAAGTTACATGAGTAAAAATATATCAATGGACAGTGGATTTCTCTGTA<br>CATTTCAAGAAGATACCTTGGGTCTGGCGTGGAAAGCCTTCATTACAAA<br>TTACCTTGAGAGGTTAATCAGCGTACTCCAAGAAAAGAAATATTCTGTC<br>AGCACTACCGGCTAGCGACAGCAAAATGATAATCCCTGGGAAACAGT<br>TCCGAATTATCCAACGTGTTATTAGCGACCAAAACAGCTAATCAGCCAA<br>TCTCTAGCAATGTTTATAGTATTGCTCAAGAAGCCGTGGAATCTCTG<br>ATGATGTTTGTGGAAATGTTTTTAATATAAAATATCAACAGAAGGAT<br>CAGTAACCTCGGATATTTTTACCACAATTGACTACTTAGTTAATGGATA<br>TAGATCAGAGTCTGAATTAACGGAGCCTGAAATCTCTGTGATGATG<br>CTCTATGCACTCTATACGAAATATATAGCAATCAGACTATAGCGTAT<br>CGCTTCAAGCTTGAAAGTAAATGCATGCAGAAGAGTGGCACACCAG<br>GTGTGGAAATATCGACGATATGTAAGTCTCTGCATAAAATGGTTTCT<br>CCATGGCCCATTATC |
|----------------|----------------------|---------|-------------|---------|--------------------|-------------------------------------------------------------------------------------------------------------------------------------------------------------------------------------------------------------------------------------------------------------------------------------------------------------------------------------------------------------------------------------------------------------------------------------------------------------------------------------------------------------------------|-----------------------------------------------------------------------------------------------------------------------------------------------------------------------------------------------------------------------------------------------------------------------------------------------------------------------------------------------------------------------------------------------------------------------------------------------------------------------------------------------------------------------------------------------------------------------------------------------------------------------------------------------------------------------------------------------------------------------------------------------------------------------------------------------------------------------------------------------------------------------------------------------------------------------------------------------------------------------------------------------------------------------------------------------------------------------------------------------------------------------------------------------------------------------------------------------------------------------------------------------------------------------------------------------------------------------------------------------------------------------------------------------------------------------------------------------------------------------------------------------------------------------------------------------------------------|
| Hyaluronidases |                      |         |             |         |                    |                                                                                                                                                                                                                                                                                                                                                                                                                                                                                                                         |                                                                                                                                                                                                                                                                                                                                                                                                                                                                                                                                                                                                                                                                                                                                                                                                                                                                                                                                                                                                                                                                                                                                                                                                                                                                                                                                                                                                                                                                                                                                                                 |
| ID             | ID/Reference protein | e-value | PFAM domain | MW (Da) | Sub-classification | Amino acid sequence                                                                                                                                                                                                                                                                                                                                                                                                                                                                                                     | Nucleotide sequence                                                                                                                                                                                                                                                                                                                                                                                                                                                                                                                                                                                                                                                                                                                                                                                                                                                                                                                                                                                                                                                                                                                                                                                                                                                                                                                                                                                                                                                                                                                                             |
| TatEnzHya01    | API81375.1           | 2 e-160 | PF01630     | --      | Other              | MSIFSTFIISIFAFSIVKANFEVFWNVPSLLCSIKFGVNL<br>TQ TLLKYKILVNNGESFIGDKIALIYENGIGKYPHIDPKKGD<br>I NGGIPQLDKLNEHLKLAENDIQKLIPNPDFNGLGIIDWEA<br>W RPIWEYHWGSLGIYKNRTLEMVKKDHPTWSEQLVQS<br>TAKNIWENSAKQWMLKTLELAKKLRLPHGRWCYYLFPD<br>C YNYFGKDQPSQFFCSAMIQNNNDRLSWMWDASTALC<br>P SIYFIENQMKYNGSQRTWFLYGKLAEAVRVARPHTRIY<br>P YINYMVHVSRIQVPEDHFWKMLSLIASLGLDGAIIHWS<br>S SYLSDITSCQDLETYVNNVIGPAVTTVSSNVERCSQMV<br>C NGRGKCTWPNDPFTSWKYLTDINSDFDSKEITCRCQT<br>H KGRYCD                                                          | ATGTCCATATTTTCTACATTTATAATTTCTATTTTGTCAATTAGTATTG<br>TCAAGGCCAATTTTGAAGTCTTCTGGAACGTACCTTCTTTGTTATGTT<br>CGATTAAGTTCGGTGTAATCTGACTCAAACCTCTTTGAAGTATAAA<br>ATATTGGTGAACAACGGGGAAAGTTTATTGGGGATAAAATAGCCTT<br>AATTTATGAAAATGGAATTGGAAAGTATCCACACATAGATCCTAAGA<br>AAGGTGACATCAATGGAGGAATTCACAATTGGATAAATTGAATGA<br>GCATTTAAAAATTGGCAGAGAATGATATTCAGAACTAATACCAAATC<br>CCGACTTTAATGGTCTTGGAATTATCGACTGGGAAGCATGGCGTCCA<br>ATCTGGGAGTATCATTGGGGATCGTTGGGCATTTACAAGAATAGGAC<br>TTTGAAATGGTGAAGAAAGATCATCCAACATGGTCTGAACAGCTCG<br>TCCAAAGTACAGCCAAGAATATATGGGAGAACAGCGCTAAGCAATG<br>GATGCTGAAAAACGTTGGAACCTTGCAAAAGATTACGTCCACATGGA<br>AGATGGTGTTACTATCTTTTCCCGACTGTTATAATTATTTGGAAAG<br>GATCAGCCATCTCAATTCCTTTGTAGTGCTATGATACAAAATAATAA<br>CGATAGATTGTCTTGGAATGTGGGACGCCAGTACTGCCCTGTGCCAT<br>CGATATATTTTATTGAAAATCAAAATGAAATATAATGGGAGTCAACGT<br>ACGTGGTTTCTTTATGGAATAATTAGCTGAAGCTGTAAGAGTTGCTCG<br>ACCGCACACAAGAATATACCCATATATTAACATATATGGTCCACGTTT<br>CCCGGATTCCAGTTCCAGAGGACCATTCTTGGAATAATGCTGTCTCTT<br>ATAGCATCCCTGGGATTAGATGGCAATTATATGGGGATCATCCAG<br>CTATCTCTCAGACATAACCTCTTGCCAAGATCTTGAAACTTACGTATA<br>TAATGTGATTGGTCTGCCGTAACACAGTTTCATCGAATGTCTGAAC<br>GGTGTAAGCCAAATGGTCTGCAATTGGAAGAGGAAAATGTACATGGCC<br>AAATGATCCGTTTACTTCGTGGAATATTTAACTGACATAAAATAGCG<br>ATTTTGATTCCAAAGAAATTACATGCAGATGTCAAACCCATAAAGGA<br>AGATATTGTGATTAA                                                                                                                                                                                                                       |

|             |            |   |         |    |       |                                                                                                                                                                                                                                                                                                                                                                                                                                                                 |                                                                                                                                                                                                                                                                                                                                                                                                                                                                                                                                                                                                                                                                                                                                                                                                                                                                                                                                                                                                                                                                                                                                                                                                                                                                                                                                                                                |
|-------------|------------|---|---------|----|-------|-----------------------------------------------------------------------------------------------------------------------------------------------------------------------------------------------------------------------------------------------------------------------------------------------------------------------------------------------------------------------------------------------------------------------------------------------------------------|--------------------------------------------------------------------------------------------------------------------------------------------------------------------------------------------------------------------------------------------------------------------------------------------------------------------------------------------------------------------------------------------------------------------------------------------------------------------------------------------------------------------------------------------------------------------------------------------------------------------------------------------------------------------------------------------------------------------------------------------------------------------------------------------------------------------------------------------------------------------------------------------------------------------------------------------------------------------------------------------------------------------------------------------------------------------------------------------------------------------------------------------------------------------------------------------------------------------------------------------------------------------------------------------------------------------------------------------------------------------------------|
| TatEnzHya02 | API81375.1 | 0 | PF01630 | -- | Other | MNSRILIGIILNYIICVIEASFKIYWNVPSYMCVRFGINV<br>TETLINSNVMVNNKEEFLGEKLVIFYENRLGKYPYIDPK<br>EGDINGGLPQLGNLEEHLVAEKDIQEIIPNPNFDGLGIID<br>WEKWRPIWDFNWGKMRIYKTRSMELMKKKHPSWPWK<br>LIENASRKEWEETAMQWMLKTIQLTKKMRPKGRWC FY<br>HLPDCYNYAGKDNPEQFLCSSLVRKHNDRLIWLWNSTT<br>ALCPSIYYDERQMKYNETQDVWFLYGRLCEVMRVSQP<br>NTPIYPYINYKVHTSLENVPKEHFWLMLSHLASLGLDGA<br>VIWGSSNYVKTEEDCKSLELYVKEVIGPAAYTISTNVNY<br>CSETVCNNNGLCTWPHQPYTSWKYLTDPNITVFNPENIT<br>CRCQLYKGRYCDMFESNSTDLL | ATGAATTCGCGCATTTTGATAGGGATAATTTTAAACTATATTATCTGT<br>GTGATCGAGGCATCTTTTAAAAATCTACTGGAATGTTCTCTTATATG<br>TGCTCAGTGAGATTTGGCATCAATGTTACAGAAACGCTGATAAATAG<br>CAATGTGATGGTGAACAACAAAGAAGAAATTTCTTGGTGAGAAGTTG<br>GTGATTTTTATGAAAATAGATTAGGAAAAATATCCATATATTGATCC<br>CAAAGAAGGTGATATTAATGGAGGGTTACCGCAGTTAGGAAATCTA<br>GAAGAACATTTAGAAGTGGCAGAAAAGGATATTCAAGAAATAATTC<br>CCAATCCAAATTTTGATGGACTTGGAATAATTGATTGGGAAAAATGG<br>CGTCCGATTTGGGATTTCAATTGGGGAAAAATGAGAATTTACAAGAC<br>AAGGTCGATGGAGCTAATGAAGAAGAAACATCCTCTTGGCCATGG<br>AAACTTATTGAGAATGCTTCTAGGAAAGAGTGGGAGAAACAGCAA<br>TGCAATGGATGTTGAAAACGATTCAACTTACAAAGAAAATGCGTCT<br>AAAGGAAGATGGTGCTTTTATCATTGGCTGATTGTTACAATTATGCA<br>GGAAAAGATAATCCAGAACAGTTCCTCTGCAGTTCATTGGTTAGAAA<br>ACACAATGACAGATTGATTTGGCTGTGGAATTCAACACAGGCTCTTT<br>GCCCATCAATATACTATGACGAACGTCAAATGAAATACAACGAACT<br>CAAGACGTTTGGTTCCTTTATGGCAGACTGTGTGAAGTTATGCGAGT<br>TTCGCAACCAAACACACCTATATACCCTTACATCAATTACAAAGTAC<br>ACACTTCTTTGGAAAATGTACCAAAGGAACATTTCTGGCTAATGTTG<br>TCTCATTTAGCGTCACTTGGCTTAGATGGAGCTGTTATTTGGGGATCT<br>TCCAATTACGTTAAACAGAAAGAGGATTGCAAAAAGTCTTGAACCTCA<br>TGTGAAAGAAGTGATTGGGCCTGCTGCATATACCATTTCTACCAATG<br>TCAACTACTGCAGTGAAACAGTGTGCAACAATAATGGACTGTGCACA<br>TGGCCTCATCAGCCTTATACTTCTGGAAATACCTGACTGACCCAAA<br>CATAACAGTATTCAATCCAGAAAATATCAGCTGCAGGTGTCAATTGT<br>ATAAAGGACGCTATTGTGATATGTTTGAATCAAATTCAACTGATTTA<br>CTGTAA |
|-------------|------------|---|---------|----|-------|-----------------------------------------------------------------------------------------------------------------------------------------------------------------------------------------------------------------------------------------------------------------------------------------------------------------------------------------------------------------------------------------------------------------------------------------------------------------|--------------------------------------------------------------------------------------------------------------------------------------------------------------------------------------------------------------------------------------------------------------------------------------------------------------------------------------------------------------------------------------------------------------------------------------------------------------------------------------------------------------------------------------------------------------------------------------------------------------------------------------------------------------------------------------------------------------------------------------------------------------------------------------------------------------------------------------------------------------------------------------------------------------------------------------------------------------------------------------------------------------------------------------------------------------------------------------------------------------------------------------------------------------------------------------------------------------------------------------------------------------------------------------------------------------------------------------------------------------------------------|

Serin proteases

| ID          | ID/Reference protein | e-value | PFAM domain | MW (Da) | Sub-classification | Amino acid sequence                                                                                                                                                                                                                                                                                                                                                                                                                                                      | Nucleotide sequence                                                                                                                                                                                                                                                                                                                                                                                                                                                                                                                                                                                                                                                                                                                                                                                                                                                                                                                                                                                                                                                                                                                                                                                                                                                                                                                                                                                        |
|-------------|----------------------|---------|-------------|---------|--------------------|--------------------------------------------------------------------------------------------------------------------------------------------------------------------------------------------------------------------------------------------------------------------------------------------------------------------------------------------------------------------------------------------------------------------------------------------------------------------------|------------------------------------------------------------------------------------------------------------------------------------------------------------------------------------------------------------------------------------------------------------------------------------------------------------------------------------------------------------------------------------------------------------------------------------------------------------------------------------------------------------------------------------------------------------------------------------------------------------------------------------------------------------------------------------------------------------------------------------------------------------------------------------------------------------------------------------------------------------------------------------------------------------------------------------------------------------------------------------------------------------------------------------------------------------------------------------------------------------------------------------------------------------------------------------------------------------------------------------------------------------------------------------------------------------------------------------------------------------------------------------------------------------|
| TatEnzSeP01 | AFS65328.1           | 6 e-156 | PF00089     | --      | Trypsin-like       | SENLMCFKMNFSFVTIPLLLFILSRASAMSRHRRQNFIF<br>PSEGENCRTPNQPGFCIPLSRCEALRRSNDFNLLRNSIC<br>GYDRDVPRVCCPSTNRRVVTENPVVVDVSTSNPVPPIEVTT<br>RRTVPDGPVIVEVTPRPRTQSTNNNTTRQKPAILPDDCG<br>RSTVSLPKIVNGIPAELAAWPWMAAVYVTRSGLTRGTD<br>CGGALISPRHVMTAAHCVTDRRGNQMSASTFTVRLGEH<br>ILNDDNDGASPDIPVVRIVRHENFQRRVFRNDIAILTLQ<br>RDVEFNRFIRPICLPYDRFSNDDLAPRGAFVAGWGTTVF<br>DGEYSPILSQIQVPIWRNEDCHR VYQAERVPI TREYLCA<br>GVSDGSKDSCQGDSGGPLMLPSEENKFYLVGIVSFGRK<br>CATVGYPGVYTRVNMFLDWIAANLT | TCAGAAAATTTAAAAATGTGTTTCAAAATGAAC TTCAGTTTCGTTAC<br>CATTCCACTACTACTGTTTATTTTAAAGTCGAGCTTCAGCCATGTCAAG<br>ACATCGAAGGCAAAATTCATTTTTCCTAGTGAGGGTGAAAAATTGTA<br>GAACTCCAAATGAGCAACCAGGATTTGTATTCCACTTAGCAGGTGT<br>GAAGCATTAAAGAAGAAGTAACGATTTTAACTACTCAGGAAC TCAAT<br>TTGTGGATACGACAGAGACGTGCCAAGGGTATGTTGTCTTCTACAA<br>ATCGCGTGT TACTGAAAAATCCTGTTGTAGTTGATGTGTCAACTTCCA<br>ATCCAGTACCTATTGAGGTAACA ACTAGACGAACTGTTCCTGATGGT<br>CCAGTAATTGTTGAAGTAAC TCCTAGACCTAGAACTCAATCTACAAA<br>TAATAATACTACAAGACAAAAACCAGCTATTCTTCCGATGACTGTG<br>GACGTTCAACCGTATCACTTCCAAAAATTGTCAATGGTATACCAGCA<br>GAACTTGCAGCCTGGCCTTGGATGGCAGCTGTATATGTTACAAGAAG<br>TGGACTCACTAGAGGTA CTGACTGTGGAGGTGCAATTAATCAGCCCTC<br>GTCATGTAATGACAGCTGCGCACTGTGTTACAGATCGCCGTGGAAT<br>CAGATGAGTGCATCTACATTTACAGTCCGCTAGGAGAACATATTTT<br>GAATGATGATAATGATGGAGCTTCACTGTAGACATCCCTGTTGTCA<br>GAATAGTTCGCCATGAGA ACTTTCAAAGACGGGTTTTCAGAAACGAT<br>ATTGCAATATTAACGCTACAGAGAGATGTAGAGTTTAAACAGGTT CAT<br>ACGTCCAATCTGCCTACCATATGATAGATTCAATGATGATGACTAG<br>CTCCAAGAGGTGCATTCGTTGCTGGATGGGGAACCACAGT TTTTGAT<br>GGAGAATACAGTCCAATACTGTACAGATACAGGTTCCAATATGGAG<br>AAATGAAGATTGT CATCGTGTCTACCAAGCAGAAAGGGTACCAATCA<br>CTCGAGAGTATCTATGTGCAGGTGTAAGTGATGGGAGTAAAGACTCA<br>TGTCAGGGTGACTCTGGAGGTCCTTTGATGTTACCCTCTGAAGAGAA<br>TAAATTTTACTTGGTGGGTATAGTTTCTTTGGAAAACGTTGTGCAAC<br>AGTTGGATACCCAGGAGTATATACCAGAGTTAATATGTTCTTAGATT<br>GGATAGCAGCAAACTCTGACA |

|             |                |        |         |    |                |                                                                                                                                                                                                                                                                                                                                                                                                                                                                                                                                                                                                                                                                                                                                                                                                                                                                                                                                                                       |
|-------------|----------------|--------|---------|----|----------------|-----------------------------------------------------------------------------------------------------------------------------------------------------------------------------------------------------------------------------------------------------------------------------------------------------------------------------------------------------------------------------------------------------------------------------------------------------------------------------------------------------------------------------------------------------------------------------------------------------------------------------------------------------------------------------------------------------------------------------------------------------------------------------------------------------------------------------------------------------------------------------------------------------------------------------------------------------------------------|
| TatEnzSeP02 | JAT91153.1     | 3 e-94 | PF00089 | -- | Serin protease | <p>SRIVGGEESP GSWPWLAALHGGPEEVFFCGGILISPWW<br/> VLSAAHCVGNQTNPSGWTMKGMTTRTSAPFFVHKRG<br/> VSLIHKHPDFLSNPFFDDDLVLLMLDKPVNFDEFRLRPICLP<br/> TLNLSLEGYDSCVVTGWGKAMYDDEADYQVVIHQVK<br/> VPIVEFEDCAKWYSLHQVNISEKMICAGYLEGEKDACQ<br/> GDSGG</p> <p>TCGAGGATAGTGGGTGGGGAGGAATCATCTCTCTGGTAGCTGGCCTTG<br/> GTTAGCTGCACTTCATGGTGGTCCAGAGGAAGTCTTCTTTTGTGGAG<br/> GAATATTAATTCACCTTGGTGGGTGCTATCTGCTGCACATTGTGTGG<br/> GAAATCAAACAAATCCAAGCGGATGGACCATGAAACTTGAATGAC<br/> CAGAAGAAGTCTGCACCTTCTTCGTTCAACAAGAGAGGAGTTTCTC<br/> TAATTATCAAACATCCTGATTTTCTCTCAAACCCATTCTTTGATGACG<br/> ATTTGGTTTTGTTAATGTTGGATAAGCCAGTTAACTTTGACGAGTTCT<br/> TGAGGCCCATATGCTACCAACTTTGAACCTATCTCTCGAAGGCTAC<br/> GATTCCTGTGTTGTGACTGGTTGGGGAAAAGCTATGTATGATGATGA<br/> AGCAGATTATCAAGTTGTCATTATCAAGTAAAAGTGCCAATTGTTG<br/> AATTGGAAGATTGCTAAGTGGTATTCTTACATCAAGTGAATATA<br/> TCAGAGAAGATGATTTGTGCTGGATATCTTGAAGGTGAAAAAGATGC<br/> CTGCCAGGGTGATAGCGGAGGG</p>                                        |
| TatEnzSeP03 | XP_015906323.1 | 1 e-55 | PF00089 | -- | Trypsin-like   | <p>AAHCVYRTATSGLRVRVGEHNIKQTSEYPYPHEEYPVRR<br/> KIVNPGYHPATYKDDIALLELSHPVIYRKHVIPACLPEKG<br/> EDFAGNVASVTGWGRLQYGNRNAPSILQRVEVKVFNL<br/> DECREMYKKIGRRETIYSTM</p> <p>GCAGCTCATTGTGTATATAGAACCGCCACTTCTGGTCTTCGAGTAAG<br/> AGTGGGAGAACATAACATAAAGCAAAGTATAGCGAACCATATCCTCAT<br/> GAAGAGTATCCGGTGAGGCGAAAGATTGTTAATCCAGGTTATCATCC<br/> AGCAACATACAAGGACGATATCGCGTTACTTGAAGTACGCCATCCGG<br/> TGATTTACAGGAAGCACGTTATACCTGCTTGTGGCCAGAAAAAGGA<br/> GAGGACTTTGCTGGTAATGTAGCGTCTGTTACTGGATGGGGTCTGTT<br/> ACAGTATGGTAACAGAAATGCACCTAGCATCTTACAAAGAGTTGAA<br/> GTGAAGGTCTTCAACCTCGATGAGTGCAGGGAGATGTACAAGAAGA<br/> TTGAAGGCGTGAAACTATATATTCTACAATG</p>                                                                                                                                                                                                                                                                                                                        |
| TatEnzSeP04 | JAT91142.1     | 9 e-68 | PF00089 | -- | Serin protease | <p>LTAAHCFGENVGRFPSNYQVRAGGHTRTDGEYYAVEEI<br/> RKHPSYTSGRHYDYDAILKVNETFIFGDTVSPACLPSPVDE<br/> SYSNSQVAAFGWGDTSFGGIPSDALQVIIIINVLSNFRCDQ<br/> SYRTLSSFPSGITDDLCLCAGLSQGGKDTCCQDSSGGPL<br/> MIKDNSTSKWTVIGVVSFGYQCAVAGYPGVYTRVSSYL<br/> PWISENMIN</p> <p>CTTACAGCGGCTCATTGTTTTGGCGAAAATGTAGGAAGATTCCCTTC<br/> CAATTACCAGGTAAGGGCAGGAGGTACATACGAGAACAGATGGAGAG<br/> TACTATGCTGTTGAAGAAATCAGGAAACATCCTTCATACACATCAGG<br/> ACGACATTATTACGATATTGCCATATTGAAAGTGAATGAACTTTTA<br/> TTTTTGGTGATACAGTTTCCCTGCTTGCTTACCTTCAGTGGACGAAA<br/> GTTACAGCAATAGTCAAGTAGCTGCGTTTTGGATGGGGAGATACCTCC<br/> TTCGGTGGAATCCCAAGCGACGCCCTCCAAGTAATAATTATCAATGT<br/> TTTGAGTAATTTTCGTTGCGACCAATCTTACAGAACACTGAGCCTGTC<br/> TTCTTTTCCAAGCGGGATTACAGATGATTTGCTTTGTGCTGGGTAAAG<br/> TCAAGGTGGTAAAGATACTTGTACGGGAGATTCCGGAGGACCTCTTA<br/> TGATTAAGGATAATTCAACTTCGAAATGGACAGTAATCGGTGTTGTA<br/> TCATTTGGATATCAGTGTGCTGTGCTGGATACCCAGGAGTATATAC<br/> CAGGGTCTCCAGCTACCTTCTTGGATTTCTGAAAATATGATAAAC</p> |



TatEnzSeP05      XP\_015907406.1      0      PF00089      --      Trypsin-like

ASAKTLPAIFAFITIVIA YVILVVKASSLQRISENQDKLKL  
KTLDSYNKNILQRQKRETECSANYTVGSKGGNLISPGYP  
KQYPESLHCQWRLKSSTSSNLILKFTDVSIEEAEDCGYD  
YLALYDETNMNMVEKICGTHSNKVVLNSTANIVFHSD  
ETYTEKGFALEYFLEVTL DCKAILNDSEGT VTSPLYPDN  
YPGNTDCHTTIMVEPGAKISLKFDVLNLEFDENCDYDY  
VDIYDGETTDSPLLGHFCSNPEDAVVMSTNNTLMVHFH  
SDPLINYNGFSASYTSVFP GIEIGNCVWEKGKNDGTITS  
PNYPERYPSNSNCRIKIQAAEGYVISIDIDSIKLEVDANCT  
YDRLEIRDGLNEDSPLLGYFCGQTNEMKHITSAQNGAYI  
IFVSDSFTEFDGFRIEYRIHRKESEIVSSEDGTVSPSTEIILP  
SQLFREQPQDFTAIEGEPHVMSCKPEDPNIEVQWTKDGL  
EIDLFLNIDLHDHGKILWIHSMSEELKGYTCTAINPHGD  
SYSVHAILDMKEREWNCDIHFRHTPKNTSILEGDTKLEIC  
SLSSSKSAQITWTKNGLPLAKSNNYQQIPNGFLLITDATL  
EMSGIYSCVAEEKSGCVRQHSASIQVSPRISIMNICGRPV  
MGKPSKRKPQMSHGRILGKNNAKKGAYPWQVIIRNFK  
HQTACGGTLVNEHWVVTA AHCLYIPKTNHRVEASFT  
VKLGEYDVEKKEPEEVL TGMEEYFVHPEFHRATFDNDI  
AMVKLLDSIQFTDYISP VCLGDHRFIRGVLF EKDLPMGT  
VTGWGRITESGPTPQFLQELRMPVVD FETCQQSTNYKV  
TENMFCAGYAQETARDACQGD SGGPFVMEHDDVWYL  
VGIVSWGEGCGKKGQYGFYTKVDNYHSWIKSIIN

GCAAGTGCCAAAAACACTGCCAGCAATTTTCGCTTTTACTATCGTAATT  
GCCTACGTTTACTGGTAGITTAAGCTTCGTCGTTGCAAAGGATTC  
AGAAAAATCAAGATAAGTTAAAATTATTGAAGACCTTGGATAGTTACA  
ACAAAAATATACTACAACGCAAAAAAGAGAAACAGAAATGCTCCCG  
CAACTATACTGTAGGTTCTAAAGGAGGAAATTTGATCAGTCTGGGT  
ATCCAAAACAATATCCTGAAAGTCTGCATTGTCAATGGCGACTGAAA  
TCCTCAACATCGTCAAAATTAATACTGAAGTTCACTGATGTGATAT  
AGAAGAAGCAGAAAGATTGCGGATATGACTATCTGGCTCTCTACGATG  
AAACAAATAATATGGTTGAGAAAAATATGCGGAACCCACAGTAACAA  
AGTTGTTGTTTAAACTCAACACTGCAAAATATTGCTTTTCATTCTGA  
TGAAACTTACACAGAAAAAGGATTTGCTTTGGAATACTTTCTAGAAG  
TGACATTGGATTGTAAAGCAATTTCTGAATGATAGTGAAGGAAGTGT  
ACAAGCCCACTTACCCAGATAACTATCTGGAACACAGATTGCCA  
TACAACTATCATGGTTGAACCTGGTGCTAAGATAAGTCTGAAGTTTG  
ATGTCCTCAACCTAGAGTTTGATGAAAACTGCGATTATGATTATGTA  
GATATATATGATGGTGAAACAACAGATTCTCCCTGTTAGGCCATTT  
CTGTTCAAATCCAGAAGATGCTGTGGTGATGTCAACCAATAATACTC  
TGATGGTTCATTTTCAITTCGACCCTTTGATAAACTATAATGGTTTCA  
GTGCATCATATACATCCGTTTTCCCTGGGATACAAGAAATAGGAAAT  
TGCGTATGGGAAAAAGGAAAGAAATGATGGCACAATCACTAGCCCTA  
ACTATCCAGAAAGATATCCAAGCAACTCTAATTGCAGAAATAAAATC  
CAAGCAGCTGAAGGTTATGTTATAAGCATTGATATTGATAGTATAAA  
GCTCGAGGTTGATGCAAACTGCACCTATGCAGAGCTGGAAATAGA  
GATGGGCTAAATGAAGATTCACCATTACTAGGATACTTCTGTGGACA  
AACAAACGAAATGAAACACATCAGTATCAGCAGCAAAATGGTGCCTAC  
ATTATTTTCGTCAGTGATAGTTTACAGAAATTCGATGGATTTCTGATT  
GAGTATCGTATACATCGAAAAAGAAAGTGAATTTGATCTTCAGAAGA  
TGGCACTGTATCTCCCTCTACTGAGATTATTTGCCATCGCAGTTATT  
CAGGGAACAACCAAGGATTTTACTGCTATAGAAGGAGAACCTCAC  
GTTATGTCTATGCAAAACCAGAAGATCCTAACATCGAAGTGCAATGGAC  
AAAAGACGGGTTAGAAATAGATTTGTTTCTAAATATCGATTTGTCATG  
ACCATGGAAAAATATTGTGGGATACATTCTATGTGAGAAAGATAAAG  
GGCACTTACACATGTACAGCAATCAACCCACATGGTGATTCTATATTC  
AGTCCATGCAATACTTGACATGAAAGAACGAGAATGGAAGTGTGAT  
ATAATTTTCAGGCATACTCCAAAGAATACCTCAATCTTAGAAGGAGA  
TACCAAGCTCATTGAATGCTCATTGTCAAGCTCAAAATCAGCACAGA  
TAACATGGACGAAAAACGGTCTTCCACTTGCAAAAGAGCAACAATTAT  
CAGCAGATACCAAATGGATTTCTTCTGATAACAGATGCAACTTTGGA  
AATGAGTGGGATTTATTCTTGCCTGGCTGAAGAAAAAGTGGATGTG  
TGAGACAGCACTCTGCATCGATACAAGTTTCCCTAGGATCAGTATA  
ATGAATATTTGTGGCCGCCCTGTAATGGGAAAACCAAGCAAAAGAA  
AACCACAAATGTCTCATGGAAGGATTTTAGTGGTAAAAATGCCAAG  
AAAGGAGCATATCCATGGCAGGTGATCATAGAAGAACTTCAACATC  
AAACGGCTTGTGGAGGCACACTAGTAAATGAGCATTGGGTGGTCAC  
AGCTGCACATTGTCTTTATATTTCCCAAACTAATCATCGAGTAGAGG  
CAAGTGCATTCACTGTCAAAGTGGGAGAGTATGATGTGGAAGAA  
GGAACCTGAAGAAGTTTAACTGGGATGGAGGAATATTTGTTCATC  
CAGAAATTCATAGAGCTACATTGACAATGATATTGCTATGGTCAAA  
CTGCTGGACAGCATTGAGTTTACTGACTATATTTCTCCAGTATGCTTA  
GGGACCAACAGATTATACGAGGTGTACTTTTGAGAAGGATTTACC  
CATGGGGACTGTAAACAGGTGGGGGAAGGATAACAGAGTCTGGACCT  
ACTCCAGATTTCTACAGGAATTACGAATGCCTGTGGTGGACTTTGA  
GACCTGCCAGCAGTCTACAAATTATAAGGTAAGTGAATAATATGTTCT  
GTGCTGGATATGCTCAAGAACTGCTCGTGATGCTTGCCAAGGTGAC  
AGTGGTGGACATTTGTTATGGAGCATGATGATGTTTGGTATCTAGTT  
GGTATTGTAAGTTGGGGTGAAGGATGTGGAAGAAAGGGACAGTATG  
GTTTCTATACAAAAGTAGACAATTATCACTCATGGATTAAATCAATT  
ATTAAC

|             |            |         |         |    |                |                                                                                                                                                                                                                                                                                                                                                                                                                                                                                                                                                                                                                                                                                                                                                                                                                                                                                                                                                                                                                                                                                                                                                                                                                                                                                                                                                                                                                                                     |
|-------------|------------|---------|---------|----|----------------|-----------------------------------------------------------------------------------------------------------------------------------------------------------------------------------------------------------------------------------------------------------------------------------------------------------------------------------------------------------------------------------------------------------------------------------------------------------------------------------------------------------------------------------------------------------------------------------------------------------------------------------------------------------------------------------------------------------------------------------------------------------------------------------------------------------------------------------------------------------------------------------------------------------------------------------------------------------------------------------------------------------------------------------------------------------------------------------------------------------------------------------------------------------------------------------------------------------------------------------------------------------------------------------------------------------------------------------------------------------------------------------------------------------------------------------------------------|
| TatEnzSeP06 | JAT91140.1 | 4 e-120 | PF00089 | -- | Trypsin-like   | <p>TVRFERVNYRMIVSLMLLFCGNVALSSWVDDYNNDRPR<br/> ICITDFDNLNPLNSRIVGGSDAGAGTFPYAVAILMGSPGDS<br/> KFRTDNSFCGGTMITESHVLTAAHCLYKNQYLADYLWL<br/> NVNDYDTRDSTETRNHVSrvKSITIHPRYVDETfDNDIAI<br/> IELSNPVSrNEKDIRMAILPPMGRTLDIGIVCTVWGWR<br/> TSYKGRRPTVMQKVLDLPITSREACQEHLShIITENMICA<br/> GGKEGEDACLGDSSGSLSRDGNVYCLAGIVSFGKGCA<br/> MKDVSGVYTNVARYIDWIYENTRTAECKPRILQ</p> <p>ACTGTTAGGTTTGAAAGAGTGAATTATAGAATGATAGTGTCATTAAT<br/> GTTATTGTTTTGCCGGCAATGTTGCATTAAAGCTCGTGGGTTGACGATT<br/> TAATAACGATCCAAGACCTATCTGTATAACAGATTTTCGATACAAATC<br/> CCTTGAATAGCCGAATTGTTGGAGGAAGCGACGCTGGTGCTGGAACC<br/> TTTCCTTATGCGGTTGCAATACTAATGGGTAGCCCCGGGAGATAGTAA<br/> ATTTAGAACAGACAATTTCGTTCTGTGGAGGAACGATGATCACTGAAT<br/> CTCACGTGCTGACAGCTGCTCATTGCTTGTACAAAAATCAATATTTA<br/> GCTGATTATTTATGGCTGAATGTGAACGATTATGATACCCGTGATTCT<br/> ACCGAAACTAGAAATCATGTGAGCCGAGTTAAAAGTATTACTATACA<br/> TCCTAGATATGTGGATGAGACCTTCGATAATGACATCGCAATAATTG<br/> AACTAAGTAATCCGGTATCACGCAACGAAAAGGATATAAAGGATGGC<br/> AATTTTACCTCCTATGGGCAGGACTTTGGATATAGGAATTGTATGTA<br/> CAGTATGGGGATGGGGAAGAAGTCTTCTATAAGGGAAGAAGACCTAC<br/> AGTAATGCAAAAAGTAGATCTTCCAATTACGAGTAGGGAGGCGTG<br/> CAAGAACATCTCTCACATATTATTACCGAAAAATATGATATGTGCTGG<br/> AGGAAAAGAAGGGGAGGACGCTTGCTTGGGTGATTCTGGTGGATCT<br/> CTTCTTTCTAGAGATGGAATGTTTATGCTTGGCTGGAATTGTGTCC<br/> TTTGGCAAAGGATGTGCAATGAAAGATGTATCAGGTGTATATACAAA<br/> TGTTGCTAGATATATTGACTGGATTTATGAAAACACAAGGACAGCAG<br/> AGTGTAACCTCGAATACTCCAAT</p> |
| TatEnzSeP07 | JAT91142.1 | 1 e-83  | PF00089 | -- | Serin protease | <p>RNSWPWMVEIEKKVGPfVQHLCGGCIIGDRYILTAHRC<br/> FSQNAERSPSNYTVRTGGHTRTDGVRYTVEEIRRHPSYK<br/> AGIHVHDIAILKLKEVIQFYDKVSPACLPNSGDDYVNKR<br/> VAVIGWGDTSFGGIPSNVLQEVYINVVNNSLCDQSYRM<br/> LSLSSfPRGITQDLLCAGVSKGGKDACQGDSSGGLMIPD<br/> FSSLRWEVIGVVsfGYQCAVEGYPGIYTRISSYLPWIAEN<br/> MKQ</p> <p>CGTAATTCCTGGCCATGGATGGTGGAATTGAGAAGAAGGTTGGCCC<br/> ATTTGTTcAGCATCTATGTGGAGGTTGCATTATCGGTGATCGTTATAT<br/> TCTTACAGCGGCACACTGTTTTAGCCAAAACGCAGAGAGGTCCCCTT<br/> CTAATTATACCGTAAGGACGGGAGGACACACAAGAACAGATGGAGT<br/> GAGATATACAGTTGAGGAAATCAGGAGGCATCCTTCGTATAAAGCA<br/> GGAATACATTATCATGACATTGCGATATTGAAATTGAAGGAAGTCAT<br/> TCAGTTCTACGATAAAAGTCTCTCCCGCTTGTTTGCCATCCAATGGTGA<br/> TGATTACGTCAATAAAAAGAGTGGCTGTcATTGGATGGGGAGATACCT<br/> CTTTCGGTGGCATTCCAAGTAATGTTCTTCAAGAAGTTTATATCAACG<br/> TGGTCAATAATtCTCTTTGCGATCAATCCTATAGGATGCTAAAGTCTGT<br/> CGTCATTTCCAAGAGGAATTACTCAGGATTTGCTTTGTGCTGGAGTA<br/> AGTAAAGGCGGTAAAGATGCTTGTcAGGGAGATTCTGGAGGTCCCCT<br/> GATGATTCCAGATTtCTCTTcATTAAAGATGGGAGGTGATTGGGGTGG<br/> TGTcATTGGATATCAATGCGCTGTTGAGGGATACCCAGGAATTTAT<br/> ACAAGGATCTCCAGCTACCTTCTTGGATCGTGAAAATATGAAGCA</p>                                                                                                                                                                                                                                                                                                                              |

|             |                |        |         |    |                |                                                                                                                                                                                                                                                                                                                                                                                                                                                                                                                                                                                  |                                                                                                                                                                                                                                                                                                                                                                                                                                                                                                                                                                                                                                                                                                                                                                                                                                                                                                                                                                                                                                                                                                                                                                                                                                                                                                                                                                                                                                                                                                                                                                                                                                                                                                         |
|-------------|----------------|--------|---------|----|----------------|----------------------------------------------------------------------------------------------------------------------------------------------------------------------------------------------------------------------------------------------------------------------------------------------------------------------------------------------------------------------------------------------------------------------------------------------------------------------------------------------------------------------------------------------------------------------------------|---------------------------------------------------------------------------------------------------------------------------------------------------------------------------------------------------------------------------------------------------------------------------------------------------------------------------------------------------------------------------------------------------------------------------------------------------------------------------------------------------------------------------------------------------------------------------------------------------------------------------------------------------------------------------------------------------------------------------------------------------------------------------------------------------------------------------------------------------------------------------------------------------------------------------------------------------------------------------------------------------------------------------------------------------------------------------------------------------------------------------------------------------------------------------------------------------------------------------------------------------------------------------------------------------------------------------------------------------------------------------------------------------------------------------------------------------------------------------------------------------------------------------------------------------------------------------------------------------------------------------------------------------------------------------------------------------------|
| TatEnzSeP08 | JAT91148.1     | 0      | PF00089 | -- | Serin protease | CFQEINFRSLRNRTLPISMKVFSSMSVSLFPPSTLFTGIPG<br>TDVVSALARLEDWTNSFIKCDRPHHKLDSWWCVWDTDT<br>MRVIFALLVTVCVSCQSPKEADYERPPKPVKPIGDYDG<br>GDVGGPPPkindyDEDGKVPPLPNPGLKPDVPSDFNDPAP<br>GGGGFDNKPsgDENcvcvpyyQCKEgeiVTDGTGIIDA<br>RKKPPPEEELPLDSQFEPFPCGSFHVCKTPQQDVVKPY<br>EHKCGIRNPGGIFGKILAPDKKGEANFGEWPWQA AVLK<br>VEGKVNIFQCGGVLVDKKHIATVAHCVCHYKGYNQYP<br>LKVRLGEYDTQKTDEFLAHDYNNVERIFCHPQFRNNSL<br>WNDMALLKLDRDVIFAPHIDSICLPTYEEVFEGQSCVVT<br>GWGKDAYKGGSYSNIMKEVNIPVIDNAKCEQLRKTRL<br>GRYYRLHDSFICAGGEEGLDCKGDGGGPLVCYRKDGS<br>YALAGLVSWGIDCGQPGVPGVYVRVQKFLEWVTQQTG<br>LQLENYWPKVY | TGTTTCCAAGAAATCAATTTTCGCAGTTTGCAGAAATCGTACGCTTCCT<br>ATTTCTATGAAGGTTATCTTTTCGTCATGTCAGTCAGTCTCTTCCCC<br>CCCTCCACTCTCTTACAGGAATTCGCGGACTGACGTAGTATCATTTG<br>GCTAGATTGGAAGACTGGACAAACAGCTTTATAAAATGTGACCGTCC<br>TCATCATAAACTAGACAGTTGGTGGTGCCTTTGGGATACAGATACAA<br>TGAGAGTCATCTTTGCATTATTAGTGACAGTTGCTTCGTTTCGTGTC<br>AGTCACCTAAGGAAGCTGATTATGAACGACCACCAAAACCTGTGAA<br>ACCGATTGGCGATTATGATGGTGGTGTGTGGGAGGTCACACACCTA<br>AGATTAACGATTATGACGAAGATGGAAGAGTACCTCTACCAAAATCCC<br>GGACTAAAACCAGATGTACCCAGTGACTTTAACGATCCCCGCCCGGG<br>AGGAGGGGGGTTTGATAATAAACCTAGTGGAGATGAAAATTGCGTC<br>TGTGTTCTTATTATCAGTGTAAAGAGGGAGAAATTGTTACCGACGG<br>AACTGGTATCATTGATGCCCGTAAAAAACACCCCCAGAGGAAGAA<br>CTCCCCCTGGATAGTCAGTTTGAACTCCATTTTGTGGTAGCTTCCAC<br>GTCTGTTGTAAAACCCCAACAGGACGTTGTAAAGCCATATGAACA<br>TAAGTCGGGTATACGCAATCCCGGTGGAATATTGGCAAAATTTCTAG<br>CTCCAGACAAGAAGGGAGAAGCTAATTTTGGTGAATGGCCTTGGCA<br>GGCAGCTGTATTGAAAGTTGAAGGAAAAGTTAACATATTCCAGTGTG<br>GTGGCGTACTAGTTGACAAGAACACATAGCAACTGTAGCTCATTGC<br>GTCTGCCATTACAAAGGTTACAACCAGTATCCATTGAAAGTTCGACT<br>TGGTGAATATGACACTCAGAAAACAGACGAATTTCTTGCCCATGATG<br>ATTACAACGTAGAAAGGATATTCTGCCACCCCAATTCGCAATAAT<br>AGTTTATGGAATGATATGGCCCTTTTGAAGCTTGACCGTGATGTTATA<br>TTTGACCCCATATTGACTCTATCTGCTTACCACTTATGAGGAAGT<br>TTCGAAGGTCAAAGTTGTGTTGTACTGGCTGGGGAAAAGACGCTTA<br>TAAAGGAGGCTCATATTCAAATATCATGAAAGAAGTCAACATTCCAG<br>TGATTGACAATGCTAAGTGTCAAGAACAACTGAGAAAACGAGATT<br>GGGCAGATATTATAGGCTTCACGATAGCTTCATATGCGCAGGAGGTG<br>AAGAGGGCCTTGACTCTTGCAAGGGAGATGGAGGAGGACCTTGGT<br>ATGCTACAGAAAAGATGGAAGCTATGCCTTAGCTGGTTAGTATCAT<br>GGGTATAGATTGTGGACAGCCAGGTGTACCAGGTGTATACGTCAGA<br>GTTTCAGAAATTTTGAATGGGTTACACAGCAGACAGGATTACAGTT<br>GAATGAATATTGGCCAAAAGTGTAT |
| TatEnzSeP09 | XP_002411811.1 | 7 e-43 | PF00089 | -- | Trypsin-like   | EGKTMskCFfENQqCGRTVPAREIDEVLyrNDSTDLDR<br>GserLEINTDgTFVIQPRILIRERfRVLsGEWPWMIAYLK<br>SNGSFVCNGFIIDNSHLLTAahCFHEKRRQLQDYyIGTIH<br>NEEILNVEVTELHIHHHYKdNYyKDIALlKMSPrLTDV<br>ASICMPSSVNESNYLLGKEITVLDWVGTEYVMQRNRIA<br>ETQLCNQLYTNLTNSPFpNGIVDELICAIPVEKTDNVCLV<br>HSGGPVMIEENGKWIAIGIATFGIPCTLPTYPAVYTRISPY<br>LQWIRDNE                                                                                                                                                                                                                                                          | GAGGGAAAAACCATGTCCAAGTGTTTCTTGAAAACCAACATGTGG<br>AAGAACTGTCCCTGCAAGAGAAATTGATGAAGTTCTCTACAGAAACG<br>ACTCTACAGATCTCGATAGAGGATCGGAACGGCTAGAAATCAACACT<br>GATGGAACCTTCGTTATAACAACCAAGAATCCTTATTCTGTAAAGGTT<br>TCGAGTTTGTCTGGTGAATGGCCTTGGATGATAGCAATCTATTTGAA<br>ATCAAAATGGAAGTTTCGCTGTGCAATGGCTTTATCATCGATAATTCTCA<br>TCTGTTAACAGCAGCTCATTGTTCCATGAAAAAGAAGGCAATTGC<br>AAGATTACTACATCGGTACGATACATAACGAGGAAATACTGAATGTA<br>GAAGTGACCGAATTGCACATTCATCATATTACAAAGATAATTATTA<br>CAAGGATATTGCGTTGCTAAAGATGTCTCCACGTTTAAACGGATGTTG<br>CTTCGATTTGCATGCCATCTAGTGCAACGAAAGCAACTACCTTTTGA<br>GAAAAGAAATAACCGTACTGGATTGGGTGCGGAACAGAGTATGTCAT<br>GCAACGAAACCGGATAGCAGAAACACAATTGTGCAATCAGCTTTAT<br>ACAAATTTAACTAATTCGCCGTTTCCTAATGGTATCGTCGATGAACTA<br>ATATGTGCCATTCTGTAGAAAAAACTGACAATGTCTGTCTGGTTCA<br>TTCGGGTGGACCAAGTGATGATTGAAGAAATGGAAATGGATTGCT<br>ATAGGAATAGCAACGTTTCGGGATACCTTGTACGCTTCCCACCTATCC<br>GGCTGTATATACTCGAATATCGCCTTATCTACAGTGGATCAGAGATA<br>ATGAA                                                                                                                                                                                                                                                                                                                                                                                                                                                                                                                                                                                                                                                                                                                                               |

|             |                |         |         |    |                |                                                                                                                                                                                                                                                                                                                                                                                                                                                                                     |                                                                                                                                                                                                                                                                                                                                                                                                                                                                                                                                                                                                                                                                                                                                                                                                                                                                                                                                                                                                                                                                                                                                                                                                                                                                                                                                                                                                                |
|-------------|----------------|---------|---------|----|----------------|-------------------------------------------------------------------------------------------------------------------------------------------------------------------------------------------------------------------------------------------------------------------------------------------------------------------------------------------------------------------------------------------------------------------------------------------------------------------------------------|----------------------------------------------------------------------------------------------------------------------------------------------------------------------------------------------------------------------------------------------------------------------------------------------------------------------------------------------------------------------------------------------------------------------------------------------------------------------------------------------------------------------------------------------------------------------------------------------------------------------------------------------------------------------------------------------------------------------------------------------------------------------------------------------------------------------------------------------------------------------------------------------------------------------------------------------------------------------------------------------------------------------------------------------------------------------------------------------------------------------------------------------------------------------------------------------------------------------------------------------------------------------------------------------------------------------------------------------------------------------------------------------------------------|
| TatEnzSeP10 | AFS65328.1     | 5 e-173 | PF00089 | -- | Trypsin-like   | <p>KRGVVINMKYILAIIVVLFVLIIQAARETRKRRQIYFPDD<br/> EEEEGCRTPNERRGSCVPLNRCPALRRASIPYLRESICRY<br/> NRNTPLVCCPSSRPQEVTPRPVVRPTRPTRPTRPTRPP<br/> APPTPRPRNPVGPNSRKPSILPTECGKSTVPVSRIIGGR<br/> KSEVGAWPWMAAVYLTRTGLSRGTDCCGALVSNRHIIT<br/> AAHCVVDDRRTVMSPSSFTVRLGEHTLNDDNDGASPI<br/> DFAVSNIVAHEDFERRTFKNDIAILTLRDRVQFNSFIRPIC<br/> LPYDSVSQQNLVSRSAFVVGWGTTAFDGNFNPVMSEIQI<br/> PIWENDECRRYQREVPI TREYL CAGVSDGSKDSCQGD<br/> GGPLMLPTSDTRFFLVGVVSFGKRCATPGYPGVYTRVT<br/> MYLDWLAENLN</p> | <p>AAGCGCGGTGTTGTGATCAATATGAAGTATATTCTTGCCATTATTGTC<br/> GTATTATTTCTAGTCCTAATCCAAGCTGCCAGAGAAAACAAGAAAACG<br/> CAGACAGATATATTTCTGATGACGAGGAAGAAGAAGGATGTAGA<br/> ACTCCAAACGAAAGGAGAGGATCTTGTGTCCCATTAATAGATGTCC<br/> TGCCTTAAGAAGAGCCAGTATCCGTATCTAAGAGAATCGATATGTC<br/> GGTATAATAGAAATACACCGTTAGTGTGCTGTCCATCATCTAGAGCC<br/> CAAGAAGTCACCCACGTCTGTAGACCGACAAGGCTACCAAGACC<br/> AACTAGGCCAACGAGGCTACTCGACCCCGAGCACACCTCCCACAC<br/> CACGACCAAGGAATCCCATAGTAGGACCTAATAGTCGAAAGCCCTC<br/> AATTTTGCCAACAGAATGTGGAAAAAGCACGGTACCTGTTAGTAGAA<br/> TCATCGGAGGAAGGAAGTCAGAAGTAGGTGCTTGGCCTTGGATGGC<br/> GGCAGTTTATTGACACGAAGTCTGAGCAGAGGAACCGATTGTG<br/> GAGGGGCGCTGTTTTCTAACAGACACATAATTACAGCCGCGCACTGT<br/> GTTGTTGACACCAGAAGAGGAACAGTAATGAGCCCTTCCAGCTTTAC<br/> AGTTAGATTGGGTGAACACACTTTGAATGATGACAAATGATGGCGCT<br/> CACCTATCGACTTTGCCGTAAGCAATATTGTAGCTCATGAAGATTTG<br/> AAAGGAGGACATTCAAAAATGATATCGCTATACTGACTCTGAGGGAT<br/> AGGGTTCAGTTCAATTCTTTCATTCGTCCTCAATTTGTTTGCCTTATGAC<br/> AGTGTAAGCCACAAAAATTTAGTTTCAAGATCAGCAATTCGTTGTTGG<br/> TTGGGGCACTACAGCTTTTGATGGTAATTTTAACCCAGTTATGTCAGA<br/> AATCCAAATACCAATATGGGAGAATGATGAGTGTAGACGAATATAC<br/> CAACGAGAAGTTCCAATTACCAGAGAATACTTATGCGCGGAGTCA<br/> GTGATGGTTCCAAGGATTCCTGTGAGGGTGATTACAGGAGACCGTTG<br/> ATGTTACCTACAAGTGACACTAGGTTTTCTTGTAGGCGTTGTGTCA<br/> TTTGAAAGCGCTGCGCAACTCCAGGATACCCAGGTGTTTATACTCG<br/> CGTTACTATGTACTTGACTGGTTAGCAGAAAAATTTGAAT</p> |
| TatEnzSeP11 | XP_011185363.1 | 3 e-27  | PF00089 | -- | Serin protease | <p>LTMLRLLLLVLVFLSAIASPINDDSSRIWNGNIATQGG<br/> FPFVASLQLVYPDGYHSHTCTVSLISTKSCLGAAHCVFR<br/> KDETVKGPDEFVIVGSYVQNDKLPQELKSLVYHEKF<br/> DHKDPIYDIALFELSNEIMLNDDIRTVKLAGPSIEVFGSIV<br/> TAIGWGRIVADRRSPHRLRYAFFDVVANSVCKDILNPE<br/> MKDDICIYSNEYISCPGDSGGPIVLEGSIDIEIGLSSYGSKI<br/> CGKIPVAVYTDVRKYLDWIKHAVGEIEIVEISDDNALY<br/> HQQS</p>                                                                                                                                               | <p>TTGACCATGCTAAGGCTTCTGTTGCTAGTTCTATATTTCTCTCCGCC<br/> ATAGCATCACCCATTAACGATGATGAAGATAGTTCAAGAATTTGGAA<br/> CGGAAATATTGCTACGCAAGGACAATTCCTTTTGTGGCGTCTCTGC<br/> AGTTAGTTTACCCTGATGGGTACCACAGTCATACCTGTACAGTTTCGC<br/> TGATTTCAACAAAAATCCTGTCTAGGAGCTGCTCACTGTGTCTTCCGGA<br/> AAGACGAACTGTGAAAGGACCTGATGAATTTTGCCTAATCGTTGGT<br/> TCTTACGTGCAAAATGATAAACTTCTTGTCAAGAACTTAAAGCCCT<br/> TGTTTACCATGAAAAGTTTGATCATAAGGATCCAATATATGACATTG<br/> CTTTGTTTGAAGTTGTCAAATGAAATCATGCTTAATGATGACATAAGA<br/> ACAGTAAAGTTAGCTGGACCAAGCATAGAAGTTTTTGGAAGCATAGT<br/> AACAGCAATTGGTTGGGGAAGAATAGTAGCAGATAGACGTAGCCCA<br/> CATCGATTGAGATATGCTTTTTTCGATGTGGTAGCTAATTCGGTGTGC<br/> AAAGACATCCTTAATCCCGAAATGAAAGATGACATTTGTATTTACAG<br/> CAATGAGTACAGCAATTGCCCGGGTGATTCTGGAGGACCCATCGTTC<br/> TTGAGGGCAGCGACATAGAAATTGGTCTTTCATCTTATGGAGGAAAA<br/> ATTTGTGGTAAAAATACCAGTAGCTGTATATACAGACGTCCGAAAAATA<br/> TCTCGATTGGATTAAAGAACATGCTGTTGGAGAGATAGAAATCGTTG<br/> AGATATCGGATGATAATGCCTTGTATACCAACAGTCC</p>                                                                                                                                                                                                                                                                                                                                                                                                                           |

TatEnzSeP12      XP\_018529593.1      2 e-30      PF00089      --      Serin protease

MTSSNSAFLLLLVDYHLTSFSKDITDKFEVAETSRIIGG  
NQAKPKQFPYAVSIQEYNEDFQTYEHICTFSLITTQSVLG  
VAHCVVQGQNEILDVDDYIGVLGTVDQWNRNNSVTFD  
EFIVHRGYNIEYFSNDIAIFVLSESVKLGDSIQTIPLIGQGV  
SFIGKRGTTFGWGFYPSATSSSTRILRYVDVDIVENEECE  
QYYGFLDKGQFCFGTEGRSGCDGDSGAPIHVRKKEY  
QMGLSFNTDPCARDPSTGTNISSYNSWIRKNVVGKPVFI  
N

ATGACTTCTTCAAATTCAGCATTCTCCTTTTGCTATTGGTTGATTATC  
ATTTGACTTCATTTTCCAAGGATATTACTGACAAATTTGAAGTTGCGG  
AAACGTCGAGGATCATTGGTGGAATCAAGCAAAACCTAAGCAGTT  
CCCATATGCAGTGTCAATTCAAGAATAACAATGAAGATTCCAAACTT  
ACGAACACATCTGCACTTTTTCCTTGATTACAACCAATCAGTTCTAG  
GGGTAGCGCATTGTGTAGTAGGACAGAATAATGAAATTTTAGATGTA  
GACGATTACATTGGAGTTTTAGGAACTGTGGATCAGTGGAACAGAAC  
CAACAGTGTAACCTTTCGATGAATTCATTGTTTCATCGTGGTTATAACAT  
CGAATACTTTTCGAATGACATTGCAATATTTGTACTTTCCGAATCGGT  
AAAACCTGGGTGATTCTATTCAAACATAACCTTTGATTGGACAAGGTG  
TCTCGTTTATTGAAAAGCGAGGTACAACCTTTCGGATGGGGTTTCATCT  
ACCCTTCAGCCACGAGTTCAACTCGTATATTGAGATACGTTGATGTT  
GATATTGTGGAATAATGAGGAATGTGAACAATATTATGGTTTCCTAGA  
TAAAGGTCAGTTTTGTTTCGGAACAGAAAGGAAGTGGTTGCGATG  
GAGATAGTGGCGCTCCAATCATAGTAAGATATCGGAAGAAGGAAGT  
ACAAATGGGTATTTTATCATTTAACACAGATCCTTGTGCAAGAGATC  
CAAGCACGGGTACAAATATCAGTTCTTATAATTCGTGGATTTCGAAAG  
AATGTTGTGGGAAAGCCAGTTTTTCATTAAT

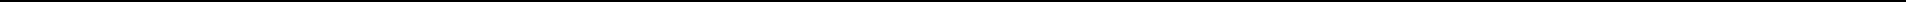

TatEnzSeP13      XP\_019869370.1      0      PF00089      --      Nudel-like

TLMREHQKTETPRLDNLAFTVTFPKDYLPYARQKRKSD  
PMESNPHWKYKRKRWWPFRRCCNLSSATTHISITVILA  
FMAALGVSIYFGLTSMYTSVPVFIYGKIRVTEGDEFDS  
SLLDANSANFASKAAIYENKLRSTYLRSLFQYVLHEVRI  
YGFREPLNIFRRLHLDRLRGTRIQQINNLARTVLLNEIH  
NGEIFEGLKIDPESVSFSGISCLDDCPTQAPTNTTPLLVS  
DWENTIDVTTKKNEQDEAHFKRLNGTNNNETVVQWVT  
PSNTKITNVTLQIDANSTLLPWKNASEWDNTTVSAKYN  
DTGVTVSSPKFVSQFTNREENTLFHQENDKQNRNLSVIE  
DDLIVPVNETLSSTDLWNEFDVVNIKDGKNKIPEC GK  
EGFRCADNKCIPGYRKCDFRSDCSDEANCTCS DYLI  
SLEQPRKICDGFMDWDYSDETHCPWCSDDMFHCPGA  
KVCINKTKVCDGIRDPCSGSDEATCMKIAKDVS GANGE  
TFAKEGYLMIQREGQWKKLCLDNNNLIDKPRWNVEKL  
GYTVCSSLTYKALESIVLSPRKYQEDSYELIPATERSGT  
KFLISDCADGKIARIRCRDLACGLGTPVQLPTKRIVGGDS  
VPMGARPWLAALYREGQFQCGAIVIADRWLLSAGHCFF  
HTKHSYWVARMGLLRRGTDMPPTYEIVKRIIQIKVNPQ  
YINKNFINDIAVLKLESAPFSPNYIRPICLPQPEDDVVKW  
NGKKCSVVGWGLGENGDEFDPDLQEVQLPVISTEECR  
KRTLFLSIYQITDNMFCAGYERGGRDACLGDSGGPMMC  
QKEDGRWVLIHISNGDGCARPSRPGVYTKVGNFMNWI  
DSIMNENATDEVKPDSCLGTRCKLGMCLFPESNCDGNA  
DCPDGSDEKGC

ACACTGATGAGGGAACACCAGAAGACAGAAACGCCACGCCTGGATA  
ATTTAGCGTTTGTAACACATTTCCGAAGGATTACCTACCGTACGCTC  
GACAGAAAAGAAAATCGGATCCGATGGAATCTAATCCTCATTGGAA  
ATATAAGAGGAAACGATGGTGGCCTTTCAGAAAGATGTTGCAATCTCT  
CCTCAGCGACTACAATTATTCAATAACTGTTACCATTTTAGCATTTA  
TGGCAGCTTTAGGTGTATCGATATATTTTGGCGTTTAAACCAGTATGT  
ACACCTCTCCAGTCTTTCACATATACGGAAAAATACGGGTAAACGGAG  
GGTGACGAATTTGACTCTTCCTTGTTAGATGCCAACTCTGTCAATTTT  
GCTAGCAAAGCAGCTATTTACGAAAAACAAGCTTAGAAGCACGTATCT  
TAGAAGTTTATTTAGTACGTATTACACGAAGTCAGGATTTACGGTTT  
TAGGGAACCTGGCTTGAATATTTTCTTCAGACTTCATTTAGACAGAA  
GAAAAGGTACCCGGATACAAGGTATTAATAATTTGGCAAGGACTGTT  
CTTTTAAACGAGATACATAATGGAGAAATATTTGAGGGCTTGAAAAAT  
CGATCCTGAATCGGTGTCCTTCTCCGGTATTAGTTGCCTTGACGACTG  
TCCAACCTCAGGCTCCCACTAACACGACCACACCTTTATTAGTATCTG  
ACTGGTTTAATACTATTGATGTCACATAAAAAAGAAATGAGCAAGAT  
GAAGCGCATTTCAAAAAGGCTTAACGGTACTAACCAACAATGAAAACCG  
TTGTTCAATGGGTCACTCCATCCAATACCAAGATCACTAACGTTACA  
ATTCTCCAAATTTGATGCAAACAGTACGTTATTACCCTGGAAAAATGC  
TTCAGAAATGGGATAAATACCACAGTAAGTGCCAAATACAAATGATACTG  
GAGTCACTGTGAGTTCACCGAAATTCGTATCGCAATTCACGAACAGA  
GAAGAGAACACACTCTTTCATCAGGAGAAATGATAAGCAGAACCCGA  
ATTTAAGTGTAATTGAAGATGATTGATTGTACCTGTTAACGAAACT  
ACACTAAGTTCGACCACCGATTTGTGGAAATGAGTTTGATGTGCTCAA  
TATTAAGATGGCAAAAAATAAAATTCAGAAATGCGGCAAAAGAGGA  
TTTCGCTGTGCTGACAACAATGTATTCTCGTTATCGTAAATGCGAT  
CGCTTCTCGGATTGTTCAGATAGTTCTGATGAAGCGAACTGCACCTG  
TTCTGACTATTTGATATCGCTCGAACACGCCAGGAAAAATATGCGATG  
GTTTTATGGACTGCTGGGATTATAGTGATGAAACCCATTGCCCCTGG  
TGTTCTGATGATATGTTCCATTGTCTCGGTGCAAAAGTGTGTATCAAT  
AAAACATAAGTATGCGATGGTATTCGAGACTGCCCTTCCGGTTCTGA  
TGAGGCCACATGCATGAAAAAGTGAAGGACGTAAGCGGAGCTAAT  
GGTTTTACTTTTGCCAAGGAAGGTTACTTAATGATTTCAGAGAGAGGG  
TCAATGGAAAAAGTTATGTCTTGACAACAATAATCTAATCGACAAAC  
CTAGATGGAAATGTGCAAAAAGCTTGAGATACACCGTTTGTTCTTCTG  
ACTTATAAGGCTTTAGAATCGATTGTTTTATCACCACGGAAGTATCA  
AGAAGATTCAATTATGAACGTATACCACTACAGAAAGGTCTGGCA  
CTAAGTTTCTTATATCCGATTGTGCAGATGGAAAAATCGCCCGAATA  
AGATGTGCGAGACTTGGCGTGTGGATTGGGAACGCCTGTTAGTTTACC  
TACCAAAAAGAAATCGTCGGAGGTGACAGCGTACCGATGGGAGCGAGA  
CCATGGCTTGCTGCTCTTTATAGAGAAGGACAGTTCCAATGCGGAGC  
TATCGTTATTGCGGACAGATGGCTTTGTGCGCGGGACATTGTTTTTT  
TCACACCAAGCATTTCTTATTGGGTGGCAAGAATGGGCTTGCTTAGAA  
GAGGGACAGATATGCCAACGCCTTACGAGATAGTGAAGAGGATTAT  
TCAGATTAAGTCAATCTCAATACATAAAATAAGAACTTCATCAATG  
ATATAGCCGTTCTTAAATTAGAGAGTGCCGTCCCCTTCAGTAATTAC  
ATTCGTCCAATCTGCTTACCACAACCAGAAGATGATGTTGTTAAATG  
GAATGGTAAAAAATGTTCAAGTTGATAGGATGGGGAAAAATAGGAGAA  
AATGGTGATGAATTTCCCGACACTTCAAGAAAGTGCAAGTTACCCGT  
CATCTCAACCGAAGAATGCAGGAAAAAGAACTTTATTTTTATCTATCT  
ATCAAAATAACCGATAACATGTTTTGTGCGCGGATACGAAAAGAGGGGGT  
CGGGATGCGTGTTTTGGGTGACTCGGGTGGTCCCATGATGTGCCAGAA  
GGAAGATGGTCGTTGGGTGTTAATTGGCATTATAAGCAACGGTGACG  
GATGTGCGAGACCTTCTCGTCCGGGGGTATATACTAAAGTTGGAAT  
TTTATGAACCTGGATAGATTCTATAATGAATGAAAACGCTACAGACGA  
AGTAAAACCTGACAGCTGCCTTGGAACCTAGGTGTAAGCTAGGCATGT  
GTCTTTTCCGAAATCAAACCTGTGATGGAAATGCAGATTGCCCGGAT  
GGTCCGACGAAAAAGGGTGC

|             |                |         |         |    |                   |                                                                                                                                                                                                                                                                                                                                                                                                                                                                                                                                                                                                                                                                                                                                                                                                                                                                                                                                                                                                                                                                                                                                                                                                                                                                                                                                                                                                                                                                                                                                                                                                                                                                                                                                                                                                                                                                                                                                                                                                                                                                             |
|-------------|----------------|---------|---------|----|-------------------|-----------------------------------------------------------------------------------------------------------------------------------------------------------------------------------------------------------------------------------------------------------------------------------------------------------------------------------------------------------------------------------------------------------------------------------------------------------------------------------------------------------------------------------------------------------------------------------------------------------------------------------------------------------------------------------------------------------------------------------------------------------------------------------------------------------------------------------------------------------------------------------------------------------------------------------------------------------------------------------------------------------------------------------------------------------------------------------------------------------------------------------------------------------------------------------------------------------------------------------------------------------------------------------------------------------------------------------------------------------------------------------------------------------------------------------------------------------------------------------------------------------------------------------------------------------------------------------------------------------------------------------------------------------------------------------------------------------------------------------------------------------------------------------------------------------------------------------------------------------------------------------------------------------------------------------------------------------------------------------------------------------------------------------------------------------------------------|
| TatEnzSeP14 | JAT91142.1     | 7 e-94  | PF00089 | -- | Chymotrypsin-like | <p>VLTPLTkMNYALLMVSLHfSKYcVLSQNEQSPSKKLS<br/> YDDDVmVEGDGcFTQFRATgVCRAITACKtLSKtERQn<br/> PKLCSWDRDVPVICCPVPLADVLKPAaitNqECGIRTAV<br/> TIITdGRLKRMALeFANRQnKPTVVgGkDVIRNSWPWM<br/> VSIRKNTQIHCGGCIIGDRYILtAAHCFdGNNRSPSDFtV<br/> RVGGHtRADGVdYSVEEIKHLLYkAGIRYHDIAILKtK<br/> ESIRfHRTVSPACLPSSeDTyVNRTATVIGWGDtFFGgIP<br/> SSVLQeASISVVNSiCDQSyrTLsLSfPEgITDnLLcAG<br/> LSEgGkDACQGDsGGPLMIFDLPSLkWMVtGVVSfGY<br/> QcAVKGFPGIyTRVSSyLPWiSeIMGS</p> <p>GTGCTAACACCCTTAACGAAAATGAACTACGCTTTGTTAATGGTATC<br/> GTTTCTGCATTTTTCTAAATACTGTGTTCTTCTCAGAATGAACAATC<br/> ACCTTCCAAGAACTTAGCTATGACGATGATGTTATGGTTGAAGGAG<br/> ACGGTTGCTTCACTCAGTTCGGTGCAACGGGAGTATGTCGAGCAATA<br/> ACAGCCTGCAAACTCTATCAAAAACGGAGAGACAAAATCCTAAAT<br/> TATGTAGCTGGGATAGAGATGTGCCAGTTATATGTTGCCCGTACCA<br/> TTAGCTGACGTACTAAAGCCAGCTGCTATCACAAACCAAGAATGTGG<br/> AATAAGAACAGCTGTAAACAATAAACGGATGGCAGACTAAAGAGA<br/> ATGGCCCTCGAATTcGCGaACCGTCAGAACAAACCTACCGTAGTTGG<br/> CGGTAAGGACGTAAATTCGTAATTCCTGGCCATGGATGGTATCCATCC<br/> GCAAAAATACCCAAATCCATTGCGGAGGATGCATCATAGGCGACCG<br/> TTATATTCTTACAGCTGCTCACTGTTTtGATGGAAATAACAGATCGCC<br/> TTCTGATTTTACCgTAAGGgTTGGTGGCCATACTCGGGCTGATGGAG<br/> TAGACTATAGTGTGGAAAGAAATtAAGAAGCACCTATTATACAAGG<br/> AGGCATACGTTATCACGATATTGCCATACTGAAAAACAAAAGAAAGT<br/> ATTcGTTTCcATAGGACAGTTTCTCCAGCTTGCTTGcCTTCGTcAGAG<br/> GATACTTACGTAAATAGGACAGCCACTGTTATTGGATGGGGAGATAC<br/> GTTTTTCGGGGGTATTCCcAGcAGCGTGCTTCAGGAAGCAAGTATTA<br/> GTGTGGTCAGCAATTCTATCTGTGACCAGTCTTACAGAAcATTAAAGC<br/> CTATCTTCTTTTCTGAAGGAATTACAGATAATCTcCTTTGTGCTGGT<br/> TTAAGCGAAGGTGGTAAAGACGCCTGTcAGGGTGATTCTGGGGGTCC<br/> TCTTATGATTTTCGACTTACCCTcATTGAAATGGATGGTGACTGGTGT<br/> AGTATcATTGGGTATCAATGTGCTGTTAAAGGATTCCcAGGAATT<br/> ACACCAGGGTCTCCAGCTACTTACCTTGgATTCTGAAATTATGGGT<br/> AGC</p>                                                                                                                                                                                                                                                                                             |
| TatEnzSeP15 | XP_013781651.1 | 1 e-141 | PF00089 | -- | Trypsin-like      | <p>GTHADDGVESVACTRAGQRlSGPSGIITPGfKdSKPYP<br/> PRAVCTWLFQLPPMKYISfEfEfFDVLSNDCKTDGVDI<br/> FAMNPPKLLRKfCGSEVPKIVILPTNDGIRLkFRSDDLYE<br/> RKGAkIKYeiLNTYPDCGkDHIRCKNGKcVSKDKKcNK<br/> IDDCGDGTDEECsNILEHPKTCGKPKYSPViGNdRIIGG<br/> QETAPHSWPWQVSiQNAISfPSGHYCGGALINNLWVVt<br/> AGHCLYGRDIGSiRIHLGMHNRfYKDDGEIVRYASKScV<br/> HPDFRRQLLKDDIALIKLNaPVAYNDNIQPVCMpPLTES<br/> LREGTYCHVTGWGTTfGTGNfHVLKQTMVPIIDHDKCK<br/> KMVKLLPLSPNAICSGfEDGYHSPCFGDSGGPFVCDYNK<br/> TWHLTGvvSWGPMMcGIReEPSVYTKVADYKPWLERII<br/> ENDEKGIQNRCL</p> <p>GGAACACATGCTGATGATGGCGTGGAGTCTGTGGCTTGTA CTGTC<br/> TGGGCAGAGACTGAGTGGTCCATCAGGTATAATTACAACtCTGGTT<br/> TCAAAGACTCTAAACCATACCCTCCACGAGCAGTATGCACATGGTTG<br/> TTCCAGCTACCACCTATGAAATATATTtCTTTTGAAATTCGAGGAGTTC<br/> GATGTAGAATTGTCAAATGACTGCAAGACTGATGGTGTGACATATT<br/> TGCAATGAATCCACCTAAATTGCTTCGAAAGTtTTGTGGTTCTGAAGT<br/> GCCAAAAATCGTTATTTTGcCTACGAATGATGGAATTCGACTGAAGT<br/> TTCGCAGCGATGACTTGATGAGAGGAAGGGTGCAAAAATCAAATA<br/> TGAGATCCTAAATACTTATCCTGATTGTGGGAAAGATCACATTAGAT<br/> GCAAGAATGGCAAATGTGTCTCCAAGATAAAAATGCAATAAAAT<br/> TGACGACTGTGGAGACGGTACTGACGAAGAGTGCTCTAACATCTTGG<br/> AGCATCCAAAGACCTGTGGCAAGCCAAAATACAGCCcAGTAATAGG<br/> AAATGGCGATAGAATAATCGGAGGACAAGAACTGCACCTCACAGC<br/> TGGCCATGGCAAGTCAGTATTCAAATGCgATATCTTTTCCATCTGG<br/> ACATTACTGCGGAGGTGCTCTTATTAAcAATCTGTGGGTAGTTACCG<br/> CCGGGCATTGCCTTTACGGaAGGGGATATTGGAAGTATCAGAATTcAC<br/> CTGGGAATGCACAATCGTTTTTATAAAGACGATGGTGAAATTGTtAG<br/> GTATGCATCTAAATCGTGTGTCCATCCAGACTTtAGaAGGCAACTAC<br/> TGAAGGATGACATTGCCTTGATAAAGCTGAACGCTCCTGTcGCATAT<br/> AATGATAATATTCAACCTGTTTGATGCCTCCACTGACCgAAAGTTTA<br/> AGAGAAGGAACGTACTGTcATGTGACAGGATGGGGAACTACGTTTG<br/> GGACTGGAATTTCCATGTTTTGAAGCAAACTATGGTTCCAATTATT<br/> GATCATGATAAAATGAAGAAAAATGGTAAAACTTCTCCACTTTCGCC<br/> TAATGCCATTtGCTCCGGATTtGAAGATGGTTATcATTcACCCTGCTT<br/> TGGTGATAGCGGTGGTCCATTcGTTTGTGATTATAACAAAACATGGC<br/> ATTtAACTGGAGTAGTTTCTTGGGGTCCAATGATGTGTGGAAATTAGA<br/> GAAGAACCTTCTGTTTATACAAAGGTtGCTGATTATAAGCCATGGTT<br/> AGAGAGAATTATTGAAAACGATGAGAAGGGTATCCAAAATCGTTGT<br/> TTG</p> |

| TatEnzSeP16        | EZA52937.1           | 5 e-25  | PF00089     | --      | Serin protease     | IGAANVRKLFALLTTLCLLPSIYVDGVEVLSPRIVGGET<br>AMAGEMPCVLAVEDVRLHGNQSYCTFCLINEQTSIGGA<br>LCVYQAKENIKTVGLFIYLIGGDVDRRNGTILPVKDIKIH<br>EEFNYSMRNDISLITVVKPITITPNLKPVLLPSPDQEFEGI<br>TAKISGWGSTTFDTWYTRYLRISEVKVLPDSDCNSFEE<br>FYQPEEHL CAGASESGLAAYDSGVPLHSMNDEQHIGVG<br>SLADTNTTDTGNNAAYTNIKHYPWIKENALGEVKLFN<br>ASSTF              | ATTGGTGCTGCTAACGT CAGAAAAATTATCTTCGCATTGCTGACGAC<br>CTTATGTCTACTTCCTTCGATATATGTGGATGGAGTGGAGGTACTCTC<br>ACCGAGGATTGTGGGAGGAGAAAAACAGCAATGGCGGGTGAAATGCCT<br>TGTGTGTTGGCCGTGGAAGATGTCAGACTCCATGGTAACCAATCCTA<br>TTGCACATTCTGTCTGATTAACGAACAACATCCATTGGAGGTGCAC<br>TCTGCGTATATCAAGCTAAAGAAAAATATAAAAAACAGTAGGTCTGTTC<br>ATCTACCTTATTGGCGGTGATGTGGATAGGCGTAATGGAACCATTTT<br>GCCGGTAAAAAGACATAAAAAATACACGAAGAATTTAATTATACAAGT<br>ATGAGGAATGACATTTCTCTAATAACAGTTGTGAAGCCTATTACAAT<br>AACACCAAATTTGAAGCCAGTCTCCTCCATCGCCAGACCAAGAGT<br>TTGAAGGAATAACTGCCAAAATATCTGGATGGGGAAGCACTACATTT<br>GACACTTGGTATACAAC TAGATATCTTCGAATATCAGAAGTTAAAGT<br>CCTTCCTGATT CAGACTGTAATTCCTTTGAAGAATTTTATCAACCAGA<br>GGAGCATCTTTGCGCTGGTGCAAGCGAATCAGGTCTTGCAGCGTATG<br>ATTCTGTTGTAACCTCTGATAATATCTATGAATGACGAGCAATAATT<br>ATTGGGGTTGGATCTCTAGCTGATACCAATACAACGGATACTGGAAA<br>TAATGCAGCATACAAAAATATAAACATTACATCCCTTGGATTAAAGG<br>AAAATGCAC TGGGTGAAGTCAAGCTTTTAAACGCTCCAGCACATTC   |
|--------------------|----------------------|---------|-------------|---------|--------------------|--------------------------------------------------------------------------------------------------------------------------------------------------------------------------------------------------------------------------------------------------------------------------------------------------------------------------------|------------------------------------------------------------------------------------------------------------------------------------------------------------------------------------------------------------------------------------------------------------------------------------------------------------------------------------------------------------------------------------------------------------------------------------------------------------------------------------------------------------------------------------------------------------------------------------------------------------------------------------------------------------------------------------------------------------------------------------------------------------------------------------------------------------------------------------------------------------------------------------------------------------------------------------------------------------|
| TatEnzSeP17        | XP_015911504.1       | 1 e-158 | PF00089     | --      | Serin protease     | DPYCGRNAVKTSRIVGGNDASFQFPWQALIQVGGSRC<br>GGALVGRCHVVTAGHCVAR SQHNPSNIRVTLGDFVLHS<br>NIESLPTE TIGVSQVKLHPNFRFTPQADRFDAVLILKRA<br>APYRANIKPICLPRKNARFLGR TAYAAGWGAVQPQSKL<br>RPKILQYVGVPIIENKICETWHKKRGINIRIHDEMM CAG<br>YERGGRDACQGD SGGPLMMKEYNVWYLI GIVSAGYS C<br>AKQHQPGIYHRVSSSDWISSNLF                                     | GATCCTTATTGTGGCAGAAATGCGGTGAAAACTAGTAGAATAGTTGG<br>TGGAAATGATGCGTCCTTTGGACAATTTCCATGGCAGGCTTTAATTC<br>AAGTAGGAGGAAGCAGGTGTGGTGGCGCTCTTGTCCGACGCTGCCAT<br>GTGTGACTGCTGGTCACTGTGTGGCAGCATCGCAGCACAAATCCCTTC<br>CAATATCCGCGTTACTTTAGGTGACTCGTTCTCCACTCAAATATCGA<br>AAGTTTGCCAAACGGAAACAATTGGAGTCAGCCAGGTGAAGTTGCATC<br>CGAATTTTCGTTTCACCCCAAGCTGATCGTTTCGACGTGGCCGCTGT<br>TGATTTTGAAGAGAGCAGCACCTTATCGTGCTAATATCAAACCCATT<br>TGCTCTACCAAGGAAGAATGCTAGATTTTGGGAAGGACGGCTTACGC<br>TGCTGGATGGGGAGCTGTTTCAGCCAGGTTCAAAGTTACGGCCGAAGA<br>TTCGTCAGTACGTAGGCGTCCCTATTATAGAAAAATAAAATATGTGAA<br>ACGTGGCACA AAAAGCGTGGGATCAATATTCGAATACATGATGAAA<br>TGATGTGTGCTGGTTATGAAAGGGGAGGAAGGGATGCCTGT CAGGG<br>TGATTCCGGAGGACCACTGATGATGAAAGAATAACAATGTGTGGTATT<br>TGATAGGAATAGTTTCTGCTGGTTATTCTTGCGCCAAACAGCACCAA<br>CCTGGAATTTACCACCGAGTTAGCAGTTCCCTCAGACTGGATATCGTC<br>TAATCTCTT                                                                                            |
| TatEnzSeP18        | AAD00320.1           | 6 e-60  | PF00089     | --      | Serin protease     | LVMKTVHIWFLLSISSAAVSVIHSV KCGVSSKRDDGKFR<br>LIVGGKPVPSGEWPWQVSLQVREGQNSFKHF CGGTLLN<br>ENWILTA AHCFGSYGIPERVVLGEHNLKVKEKTEVHRNI<br>AKTVLHPLYDRETISHDVALVKFLEPLDLEYEHNHLVPI<br>CIPDKD TDVDNLSCVATGWGHLTPRGRRPDILQAVVLP I<br>IDQEECKDRYTNVISYPITSDMICAGASEDGKGT CQGDS<br>GGPLQCRMGQQWYQVGITSWGIDCASGLFPD VYARVS<br>SVHEWIRSTINGQ | TTAGTCATGAAGACAGTACATATTGGTTCTCTGCTTTCATTCTTCA<br>GCTGCAGTTTCGGTCATCCATAGTGTA AAATGTGGCGTTTCGTCGAA<br>AAGAGATGATGGCAAGTTTAGGTTGATTGTAGGAGGAAAGCCAGTG<br>CCCTCTGGTGAGTGGCCTTGGCAAGTATCTTTGCAAGTCAGAGAAGG<br>GCAAAATAGTTTCAAACATTTCTGTGGAGGGACTCTTTTGAATGAAA<br>ATTGGATTTTAAACAGCAGCCCATTTGCTTTGGAAGTTATGTTATCCCG<br>AAAGAGTTGTTCTTGGAGAACATAATTTAAAGAGTGAAGGAGAAAAAC<br>GGAAGTTCACAGGAACATTGCAAAGACTGTGCTTCATCCTCTATATG<br>ATCGAGAAACTATATCCCATGATGTAGCTTTAGTAAAGTTTGTGGAA<br>CCTTTAGATTGGAAATATGAGCATAATCACTTGGTCCCAATATGTATT<br>CCTGACAAAGACACAGATGTAGACA ACTTGTCTGCTGAGTGGCACTGG<br>TTGGGGACACCTTACTCTAGAGGAAGACGTCCAGATATACTGCAGG<br>CAGTAGTCCTGCCAATTATAGATCAGGAAGAGTGCAAAGATCGATAC<br>ACAAATGTAATTTCTTATCCAATCACATCTGATATGATCTGCGCTGGA<br>GCATCTGAAGATGGAAAAGGCACTTGTCAAGGCGATTCTGGTGGACC<br>ATTACAATGTAGAATGGGGCAGCAGTGGTACCAGGTTGGAAATTACAT<br>CTTGGGCATAGATTGTGCATCGGGATTGTTTCCAGATGTGTACGCT<br>CGTGTCTCTAGTGTT CATGAGTGGATTCTGTTCAACTATCAATGGTCAA |
| Metalloproteinases |                      |         |             |         |                    |                                                                                                                                                                                                                                                                                                                                |                                                                                                                                                                                                                                                                                                                                                                                                                                                                                                                                                                                                                                                                                                                                                                                                                                                                                                                                                            |
| ID                 | ID/Reference protein | e-value | PFAM domain | MW (Da) | Sub-classification | Amino acid sequence                                                                                                                                                                                                                                                                                                            | Nucleotide sequence                                                                                                                                                                                                                                                                                                                                                                                                                                                                                                                                                                                                                                                                                                                                                                                                                                                                                                                                        |



|             |                |         |                     |    |                  |                                                                                                                                                                                                                                                                                                                                                                                                                                                                                                                                                                                                                                                                                                                                                                                                                                                                                                                                                                                                                        |                                                                                                                                                                                                                                                                                                                                                                                                                                                                                                                                                                                                                                                                                                                                                                                                                                                                                                                                                                                                                                                                                                                                                                                                                                                                                                                                                                                                                                                                                                                                                                                                                                                                                                                                                                                                                                                                                                                                                                                                                                                                                                                                                                                                                                                                                                                                                                                                                                                                                                                                                                                                                                                                                                                                                                                                                                   |
|-------------|----------------|---------|---------------------|----|------------------|------------------------------------------------------------------------------------------------------------------------------------------------------------------------------------------------------------------------------------------------------------------------------------------------------------------------------------------------------------------------------------------------------------------------------------------------------------------------------------------------------------------------------------------------------------------------------------------------------------------------------------------------------------------------------------------------------------------------------------------------------------------------------------------------------------------------------------------------------------------------------------------------------------------------------------------------------------------------------------------------------------------------|-----------------------------------------------------------------------------------------------------------------------------------------------------------------------------------------------------------------------------------------------------------------------------------------------------------------------------------------------------------------------------------------------------------------------------------------------------------------------------------------------------------------------------------------------------------------------------------------------------------------------------------------------------------------------------------------------------------------------------------------------------------------------------------------------------------------------------------------------------------------------------------------------------------------------------------------------------------------------------------------------------------------------------------------------------------------------------------------------------------------------------------------------------------------------------------------------------------------------------------------------------------------------------------------------------------------------------------------------------------------------------------------------------------------------------------------------------------------------------------------------------------------------------------------------------------------------------------------------------------------------------------------------------------------------------------------------------------------------------------------------------------------------------------------------------------------------------------------------------------------------------------------------------------------------------------------------------------------------------------------------------------------------------------------------------------------------------------------------------------------------------------------------------------------------------------------------------------------------------------------------------------------------------------------------------------------------------------------------------------------------------------------------------------------------------------------------------------------------------------------------------------------------------------------------------------------------------------------------------------------------------------------------------------------------------------------------------------------------------------------------------------------------------------------------------------------------------------|
| TatEnzMtp01 | AMO02512.1     | 3 e-118 | PF00200             | -- | ADAM-like        | <p>SPNARHGGSYLMYTVSVSGYDPNNKKFSPCSIRSVRAV<br/>LLAKASKCFSTPEESFCGNSLVEVGEQCDAGLIGSEDND<br/>PCCDTNCTFRKDVICSDKNSPCCRDCRYVAAGEKCRDA<br/>QTTACKKEAYCSGDSSDCPPSAPQPNKTLCLDRGQCLM<br/>GECIPFCETRDRLSCMCDREEDACKRCCRRSQNDTCDP<br/>MEPVEILRDG</p>                                                                                                                                                                                                                                                                                                                                                                                                                                                                                                                                                                                                                                                                                                                                                                              | <p>TCACCTAATGCACGGCATGGTGGTTCCTATCTGATGTATACATACTCT<br/>GTTAGTGGTTATGATCCAAATAATAAGAAATTCTCGCCTTGCAGTAT<br/>ACGTTCTGTTCCGAGCAGTATTGCTAGCTAAAGCGAGCAAATGTTTTT<br/>CCACACCAGAAAGATCATTCTGCGGCAATTCACTAGTTGAAGTTGGA<br/>GAACAGTGTGATGCTGGTTTGATTGGAAGTGAAGATAATGATCCTTG<br/>TTGTGATACAAATTGTACCTTTAGAAAGGATGTGATATGCAGTGACA<br/>AAAATTCACCTTGTGTCTGATTGTGCGGTATGTAGCAGCAGGGGAG<br/>AAATGTAGAGATGCGCAGACAACAGCATGTAAAAAGAAGCATACT<br/>GCAGTGGGGACTCATCTGATTGCCCGCCATCTGCACCTCAGCCTAAC<br/>AAAACACTTTGTTTAGATAGAGGGCAATGCTTGATGGGAGAATGCAT<br/>TCCTTTCTGTGAGACAAGAGACCGGCTATCATGCATGTGTGACAGAG<br/>AGGAAGATGCATGTAAGCGATGTTGTGCGCGTTCACAAAATGACACC<br/>TGTGATCCTATGGAGCCTGTAGAAATTCTAAGAGATGGC</p>                                                                                                                                                                                                                                                                                                                                                                                                                                                                                                                                                                                                                                                                                                                                                                                                                                                                                                                                                                                                                                                                                                                                                                                                                                                                                                                                                                                                                                                                                                                                                                                                                                                                                                                                                                                                                                                                                                                                                                                                                                                                                                                                     |
| TatEnzMtp02 | XP_013793082.1 | 0       | PF13574,<br>PF00200 | -- | Disintegrin-like | <p>MIQNKFFLSLLVCFVTGGETGRLNQYISYFEPLRYNHET<br/>VHQGHLRAKRSPSDSLVYVNFHAHGRHFNIRLKRDTSA<br/>FAPDVVIETTNNGVAEVDTSHLVDGHLLEGSGSTVYGSIR<br/>NGVFEGKIHTPNKVYYYVERSHKYFSSNPQPFHSVIYSSD<br/>DVEDPYADKRESHAGGCGITEDVLQWMQEVSNSADPK<br/>EMSPTNKTTNPEQSHLERSERSTAAENAPHNIYTREAQR<br/>DINQIDQLQAKRACTLYVQTDVFLWKHILTYEKTASSA<br/>REEISSLSIQHVRAVNYIYENTDFDGYRGIKFVVQRIKIN<br/>DTSSCSNQGLDYKRTNPFCSPNIDVSNFLNLSQFNHDD<br/>FCLAYIFTYRDFSGGTLGLAWVASASGASGGICEKYKPY<br/>NENINGRQVQTKRSLNTGVITFVNYSRVPKPVSELTLA<br/>HEIGHNFGSPHDYPIDCRPGGSDGNFIMYASATSGDRKN<br/>NNKFSQCSIRNITTVLRAVFNGEGKENCQFQSDGAFCGN<br/>KIVENTEEDCGYDAKECNDECCYPRDVTFLQMKDPNA<br/>QRCKLRPRKVKVSPSQGPCCSPSCNYVANGTICRGESECT<br/>LISLCNGSSAVCPASKPRPNRTECNKGTQVCWNGECTGS<br/>ICQKYNMEECFLTSLNGAKPEEMCEVACQKLGQPATCE<br/>STYGIAMKKNISGLKLQPGSPCNEFGQYCDVFQKCAV<br/>DAEGPLARLKNLLLNQQLRTIKQWITTYWWAVMLML<br/>VGLAIFMGLFIKCCAVHTPSSNPRKAPALRISDTLRHPAD<br/>TLRRKRHRPPPPQGPISGPPPPYPGPQPSAPPSRSRSSAGP<br/>SRGYGEGRGHYNRRDRGQMHHGERGKLYIEDPSYAPA<br/>HPGRGSAMEMRVKSQA</p> | <p>ATGATACAAAAAAGTCTTTTTGTCACTGCTTGTGTGTTGTGACA<br/>GGAGGTGAAACCGGTGCACTTAATCAGTATATAAGTTATTTGAGCC<br/>ACTGAGGTACAACCACGAACTGTACATCAAGGTCACTTACGTGCCA<br/>AACGTTACCTTCAGATTCTTAGTTATGTGAATTTCCATGCAGATG<br/>GAAGGCATTTTAATATTCGACTTAAAGGGACACATCAGCTTTTGCT<br/>CCAGATGTTGTATAGAACTACTAATGGTGTAGCAGAAGTTGACAC<br/>ATCCCACCTTATATGATGGGCATTGTGTAGGGGAATCAGGATCCACTG<br/>TATATGGCTCAATAAGGAATGGTGTATTTGAGGGAAAGATTATACA<br/>CCGAACAAAGTTATTATGTAGAACGCTCTCACAAATATTTTTCATCA<br/>AACCTCAACCATTTCACTCTGTGATATACTCATCAGATGATGTGGA<br/>AGATCCATATGCTGACAAACGGGAGTCACATGCAGGTGGATGTGGC<br/>ATCACAGAGGATGTTTACAGTGGATGCAAGAAGTTAGCAATTCAAGC<br/>AGATCCTAAAGAAATGTCCCTACAAACAAGACAACAACCCGGAG<br/>CAGTCTCATTGGAAAGAAGTGAACGTTCAACAGCTCGGGAATAATGC<br/>ACCTCATAATATCTATACAAGAGAAGCGCAACCGTGATATTAATCAGA<br/>TAGACCAATTACAAGCAAAAAGAGCATGTACATTATATGTGCAAAAC<br/>AGATGTATTTCTATGGAAGCATATTTTGACGTATGAAAAACTGCTA<br/>GTAGTGACGACGAGAAGAAATATCTTCATTATATCTCAACATGTGAGA<br/>GCCGTTAACTATATTTATGAAAATACTGACTTTGATGGCTATCGGGG<br/>CATAAAGTTTGTGGTGCAAGAAATTAAGATAAATGACACATCATCGT<br/>GTTCCAATCAAGGGTGTGGATTACAACGCAACAAATCCATTCTGCTCG<br/>CCAAATATTGATGTATCAACTTTTTAAATTTGAATTCCTCAATTCAAC<br/>CATGATGATTTCTGTTTAGCATATATTTTACGTACAGAGATTTCTCT<br/>GGTGGTACATTAGGACTTGATGCGGTGTCATCAGCATCAGGTGCTTC<br/>TGGAGGAATCTGTGAGAAATACAAGCCATACAATGAAATATTAAAT<br/>GGCAGACAAGTACAAACCAAAAGAGCTGAAACACTGGTGTGATTA<br/>CCTTTGTCAATTACAACAGCCGAGTACCTCCAAGGTGTCAGAAATTG<br/>ACATTGGCTCATGAAATTTGGACACAACATTTGGTTGCTCATGATTAT<br/>CCTATTGACTGCAGACCTGGTGGTAGTGACGGAACCTTTATTATGTA<br/>TGCAAGTGCTACATCTGGGGATAGGAAGAAACAATAACAAATTTTCTC<br/>AGTGCAGTATCAGAAACATTACTACTGTCTCCGTGCTGTGTTCAAT<br/>GGCGAAGGAAAGGAAAAATTGCTTTCAGCGAAGTGATGGTGCTTTCTG<br/>TGGTAATAAAATTGTGGAAAAATCTGAAGAATGCGACTGTGGGTATG<br/>ATGCAAAGGAATGCAATGATGAATGCTGCTATCCACGAGACGTCAT<br/>CTTTTCCAATGAAAGATCCAATGCACAACGATGCAAACTACGTCC<br/>AAGAAAAGTTTGAGTCCAAGCCAAGGACCATGTTGCTCACCATTCT<br/>GCAATTATGTTGCGAATGGCACCATTTCGAGAGGAGAATCTGAATGC<br/>ACTCTCATTTCTGTGCAATGGAAGCAGTGAGTGTCCTGCATC<br/>AAAACCAAGGCCATAAGAACAGAATGTAATAAAGGAACACAAGTC<br/>TGTGGAAATGGTGAATGTACTGGTTCTATTTGCCAGAAATATAAT<br/>GGAAGAGTGTTTCTGACTAGTCTGAATGGTGCAAAACAGAAAGAG<br/>ATGTGTGAAGTAGCTTGCCAGAAATTAGGTCAACCAGCAACATGCGA<br/>AAGTACATATGGAATTGCAAAAATGAAAAATATTAGTGGGTAAAG<br/>CTACAACCAGGATCACCATGCAATGAATTTCAAGGCTACTGTGATGT<br/>ATTTCAAAAGTGACAGAGCTGTGATGCAGAGGACCATTAGCACGCC<br/>TCAAGAACTTACTATTAACCAAGCAAACTTGAGAACTATTAAGCAA<br/>TGATAACAACATATTTGGTGGGCTGTCATGCTGATGCTAGTAGGATT<br/>GGCCATCTTCATGGGTTTGTATATAAAGTGTGTGCTGTACATACACC<br/>TAGCAGTAATCTAGGAAAGCTCCAGCACTTCGTATCAGCGACACGT<br/>TGCGTATCTGCTGACACTCTTCGCAAGAAAGCGGCACCGTCCACCA<br/>CCACAACCAGGCATTCTAGCGGACCACCTCCACCTTATCCAGGACC<br/>TCAGCCTTCAGCACCTCCCTTAGGAGTAGATCTTCAGCTGGACCAT<br/>CACGTGGTTACGGAGAAGGTGCGGGACATTACAACAGAAGGGACAG</p> |

AGGCCAAATGCATCATGGTGAAAGGGGGAAGTTGTATATTGAAGAC  
CCGTCTATGCTCCTGCTCATCTGGTCGGGGCAGTGCAATGGAAAT  
GAGGGTTAAATCACAGGCCTGA

ATGCATTGGATATATATAGTTATCATATTTTTCTGTTATGGAACAACG  
TTACGGATCTGCGCTTTGTTGAAGAGGAAAAGAGAAGCTGATTCATT  
CCCTTTTGATGATGTTGAGATGAGAATTGGCCTGTGCTGAGGCTG  
ATCGCTTAAGGCGAATATATCCAGAGAATGAACGTCTCATAGCCAAC  
ATTCCGAGTCGTTTCTTTGAAGTTATCTATCTGTGCAAGGTACGACAG  
CATCAAAAGCTGGGTATTTCCACAAGGGATGCCACAGCCAACAAAG  
TAAGCCTCCCTAGTACTGGCAAGCACTTCCATCAGACATCCCTCCTTG  
TCAAAGCTTTCAATTACAAATCCGTCTTGAATTGGAATTGAATATGT  
ACCTTTTGGCACCAACCTTATCCAAAAGCATTTTTGCTGGAAGGA  
GCACAACAAATATCTACTCAGGAAATAGAACATTGTTACTATCATGC  
TGTTATCAAAGATTATCCAGGTGCTCTTGCTGCACCTAGGACCTGTAA  
TGGAGTTAGTGGCATTATTCATGTCACTAATGAACTTTTGTAAATTC  
TCCTTTCTATGGAGGTGATCTTTCTAGGAAGCATCCACATGTAATTTA  
TCGATATTTTGGTGAAGCAAAAAGAAAACATATGTGTGGAATATACA  
GGAATGCATGAATGGGGCTTCAACAATTTAGAATACAAACGAGAA  
GAATTAAGCGGGATGTACGAGAAGTTTCAAAATTCATAGAACTTGCT  
TTAGTGTTAGATCAGGCAATGTTTGACAAATCGGAATGCAACTAGATC  
TGAAGTAGTAAATGATGCTATCCAGGTTGTTAATTGTGTGGATATGT  
ACTTTCGAACGTGTTAACTAGAGTATCTGTTTTGTATGTGGAGACAT  
GGGCTCATGGTGATCAAAATGGAATTAACAACGATGTACGACAGAG  
ATTGTAAACTTTATGGAATATGCTTCCCGAAAATTATATAAAGTTG  
CAAAGGATGCCACCCATTTATTAACAGGGCATCATTTAAAGGTGCT  
GAAGTGGGCATGTCTGTGCCAGATAGTATTTGTACAGCTAAAGCAGT  
TGGAGTTAGTCAAGATACCAATATCCATGAACCCCATCTAGTAGCAA  
GTACGATGACTCATATGTTAGGACACAACATTGGAATGAGCCATGAC  
CAGTATGATAATAATGATGAATGTGAATGTCAAGATTGGTGGGGTG  
CATTATGGCACAACAATTCTGGGTCAAAATAGGATACAAACCATATC  
ACTTTTCCAAGTGTAGCTTTCAGGATTATATTAATGCTCTTCGCATTG  
GTCAATGGTATCTGTCTATTCAACAAGCCAATCAGCTAGAAGACTTC  
AGGAGTTGTGGAATAAGCTAGTTGAAGAAAGGTGAACAGTGTGATT  
GTGGTAGTATTGATGAATGCTTAGAACATGATCAGTGTGTGATCCT  
ATCACTTGCAAGCTGCGAGTTGAAGCTGAATGCTCCAAAGGTCCATG  
CTGTGCTGACTGCAAGCTAAAGGCTAGTGGACAACCTGTGCGAGAGG  
CAATTGATGAGTGTGATATCCAGAATATTGTAATGGACGTGATGGG  
CAGTGTCCAAGTCACTTGTCAAGAGAAATGGTGCCTTGTGTAAAAA  
TGGAAATTGGTTTTGCTTCAATGGTAGATGTCCAAGTGTGATGAAC  
GTTGTGAATACATTGGGGATTTGGTGCAATCTCAGATATCCAAT  
GTTATGAACAGTTTAAACACACAAGGAAGTCTAAATGGTCAATTGGG  
ACTGATGGAAAAGGTGGATACATCAAGGTACAGAAAGAAAATATTC  
TCTGTGGTACTGTTCAAGTGTGACGAAGGTAGACGTGTGCCTATTGTG  
CAAGGAATGAATAAACAGTATGCAAGTACAATTGTATCTATTGGTGG  
GGCAGAGTATGAATGCAAGTTGCTAGTGGAAATCTGGACTTAGATA  
TAGTTGACCTTGAATGATGCCTGATGGCTCAAAGTGTGCTGAAAAT  
AAGATATGTGTGAATCAGACTTGCTCAGGTTAGATCTGTTGTGGA  
GCCAGGTAGCTGTCTGTCCAATAATGTTGCACCTTCTTGTCTGGCCA  
TGGTGTATGTTCAAATATTAATACTTGCTTTTGTGATGAGGGCTGGAC  
AGCAGCAGATTGTAGCCAACGTTTAAATGGTGATGATCCTGCAGCTG  
ATCATACTGATGAACCTTTTGGAGGAGGAAACCATGCTTATATCCCT  
GTCTCAACTACGCAAGGATCTGCATCAGAAAAATGGACAAAATCTAA  
AAAAGACACCAAAAGTCAACAACCTACGGGAAGAAGGATGCTTTAAG  
TGCACCATCACTTGTGGTTGTGCTCGTTTCAGTTGTTGGAGGGGTTTT  
TATAITCTTCGCTCTACTAGCAACATGCTACAGAAGAAGCACACTTC  
CAAAGCAAGAACCACCTCATATGAAAAAGCACATAGTTAGAAAAGCA  
CACACTGCCATTAAGTGTGCTACTAAACGTGATGAAGATTCATCTC  
AAGAAAATGTGAATAGAATAATTACCTTTGGTAGCATGCCATCTTAT  
CGGGAAGACAAAACAAAGGCAGCACTGAGTTAAAAGACAACTTTCAT  
TTCTGAAGAAGGGGAAAGTCAT

MHWIYIVIFFCYGTTLRICALLKRKREADSFPPDDVGD  
NWPVAEADRLRRIYPENERLIANIPSRFFEVIYPVQVRQH  
QKLGISTRDATANKVSLPSTGKHFHQTSLLVKAFNYKFR  
LELELNMYPALLPNLIQKHFLPEGAQQISTQEIHCYHYA  
VIKDYPGALAAALRTCNVSGHHVSNFTFVIHPFYGGDLS  
RKHPHVIYRYFGEAKEKHMCGNTGMHEWGFQFRIQP  
GRIKRDVREVFKFIELALVLDQAMFDNRNATRSEVVND  
AIQVVNCVDMYFRTVNTRVSVLYVETWAHGDQMEINN  
DVRQTLNFMHEYASRKLYKVAKDATHLLTGHFFKGAE  
VGMSVPDSICTAKAVGVSQDTNIHEPHLVASTMTHMLG  
HNIGMSHDQYDNNDCECQDWWGCIMAQTILGQNRQ  
PYHFSKCSFQDYINALRIGHGICLFNKPQNLEDFRSCGNK  
LVEEGEQDCDSIDELEHDQCCDPITCKLRVEAECSKG  
PCCADCKLKASGQPCREAIIDECDIPEYCNGRDGCPTDL  
FKRNGALCKNGIGFCFNRCPSADERCEYIWDGAVSS  
DIQCYEQFNTQGLSLNGHCGTDGKGGYIKCTEENILCGTV  
QCQQGRRPVIVQGMNKQYARTIVSIGGAIEYECKVASGN  
LDL.DIVDLGMMPDGSKCAENKICVNQTCRLDLFVEPG  
SCLSNNVALPCSGHGVCSNINTFCDEGWTAADCSQRL  
NGDDPAADHTDEPFGGGNHAYIPVSTTQGSASENGQNL  
KKTPKSTTYGKKDALSPSLVVVLVSVVGGVFIFFALLA  
TCYRRSTLPKQEPHMKKHIVRKHTLPLTVATKRDEDESS  
QENVNRIITFGSMPSYREDKQRQQLQLKDTLSLEEESH

TatEnzMtp03      XP\_021004202.1      0      PF01421,  
PF00200      --      Disintegrin-like

TatEnzMtp04      XP\_021001151.1      3 e-86      PF00200      --      Disintegrin-like

LKGCFTFEPQDAICGNEVVEKGEECDGWEEDCEEPCCF  
PMRSNPPRDEPPCHLRPNVVCSPSQGPCCTHDCRIKVGE  
ECRGDNGCRSASYRDQGPHCPSSSTNKNPNTVCNDEFV  
CYMGECTGSICMAYGLESCQCKRGLHDPLTKACELCCK  
LPRD

TTAAAAGGTTGTTTCACTGAGCCACAAGATGCCATGTGTGGAATGA  
AGTAGTTGGAGAAGGTTGAAGAAATGTGACTGTGGCTGGGAAGAGGAC  
TGTGAAGAACCATTGTTGTTTTCCCATGCGTAGCAATCCCCTAGAGA  
TGAACCACCTTGTCACCTTAGACCCAATGTAGTTTGCAGCCCAAGCC  
AAGGTCCTTGTGTACACATGACTGTAGGATAAAGGTTGGAGAAGAG

TGTCGTGGAGATAATGGTTGTAGAAAGTGCAAGCTACCGTGATGGTCA  
AGGACCACATTGCCCATCATCCACCAACAAACCAATAAAACTGTCT  
GCAACGATGAATTTGTTTGTATATGGGAGAATGTACAGGCTCGATA  
TGATGGCATATGGACTAGAGTCTTGCCAGTGCAAACGTGGCCTACA  
TGATCCTTTAAACAAAAGCATGTGAACTTTGTTGTAAGCTGCCAAGGG  
AT

---

ATGGCGGACAAAGAAGAAAATGAACCGACAATTGCTCAAGATCTTG  
TTGTGACTAAATATAAAATGGCTGGAGAAATGGTTAATAGAGTCTA  
GGTCAACTGATAAAAAAATGCCAGACTGGAGAGAGTGTAATCAACA  
TATGCGAATTGGGTGATAAATTGTTACTGGATGAAACAGGGAAGGTT  
TTTAAAAGGGAAAAAGAAATGAAAAAGGTATTCATTTCACCAT  
GTTTATCAGTGAACAACGTATTGTGCAATTTTCACCATTGAAAAGTG  
AACCTGATTATATTTTAAAAGATGGGGATATGGTTAAAGTGGATTG  
GGAGCACACATTGATGGATTTATTCAGTGGTTGCTCACACATTGAT  
TGTTGGCTCAGAAAAGGACTGCAAAATTGCTGGTAAGAAGGCAGAT  
GTCATTAAAGCTGCTTACTATGCTGCAAGCTGCTCTAAGACTAGT  
AAAGCCAGGTGGAGAGAATTCTGAAGTCACTGAAGCTGTTTCAGAAA  
GTAGCAGAATCATTTAAATGTAGGCCTGTGAAGGTATGCTATCATA  
TCAGTTAAACAATACAGGATAGATGGTGAAAAATCGATAATTCAA  
AATCCTACAGAAGCTCAAAGGAAGGAACATGAAAAATGTGAATTTG  
AGCTACATGAAGTTTATGCGGTAGATGTTTAAATTAGTACAGGTGAA  
GGAAAGGGTCGTGAAATGGATACACGTACCACTGTATACAAGAAAA  
CAGATGAAATATATCAATTAAGATGAAAGCATCTAGGGCATTTTT  
AGTGAAGTAGACAAGAGATTTGGTAATATGCCTTTCACATTAAAGAGC  
ATTTGATGATGAGAAGAAAGCCAGGATGGGTGTAGTTGAATGTGTCA  
ATCACAACTTGTTGAACCTTTTACAGTTTATATGAAAAAGAAGGA  
GAATATGTAGCACAGTTCAAATTTACTGTTTTGTTAATGCCTACTGGG  
TCCCATAAAATTACAACTGGTCCTATTGATATGGATATTTATGAATCA  
GAATTCAAATTAGAAGATGAATCGTTAAAGTCATTGTTAAATCGTTC  
TGTGGCACCAAAGTCAGCTAAGAAGAAAAAGAAAAAGGCAGAAAA  
AGCTGTAGCATCATCGGTAGAAACAGGTGACAAAATTGAAGATGAA  
AACTAAATGAAAATAATACCTTGTTGTAAGATTGA

---

|             |                |   |         |    |       |                                                                                                                                                                                                                                                                                                                                                                                                                                                       |
|-------------|----------------|---|---------|----|-------|-------------------------------------------------------------------------------------------------------------------------------------------------------------------------------------------------------------------------------------------------------------------------------------------------------------------------------------------------------------------------------------------------------------------------------------------------------|
| TatEnzMtp05 | XP_015912698.1 | 0 | PF00557 | -- | Other | MADKEENEPTIAQDLVVTKYKMAGEMVNRVLGQLIKK<br>CQTGESVINICELGDKLLDETGKVFKREKEMKKGIAFP<br>TCLSVNNCICHFSPLKSEPDYILKDGMVKVDLGAHIDG<br>FIADVVAHTLIVGSEKDCKIAGKKADVIKAAYYAAEAAL<br>RLVKPGGENSEVTEAVQKVAESFKCRPVEGMLSYQLKQ<br>YRIDGEKSIIQNPTAEQRKEHEKCEFELHEVYAVDVLIS<br>GEGKGREMDTRTTVYKKTDEIYQLKMKASRAFFSEVD<br>KRFGNMPFTLRAFDEKKARMGVVECVNHKLVEPFTV<br>LYEKEGEYVAQFKFTVLLMPTGSHKITTGPIDMDIYESE<br>FKLEDESLSLLNRSVAPKSAKKKKKKA EKAVASSVET<br>GDKIEDEKLNENNTLVED |
|-------------|----------------|---|---------|----|-------|-------------------------------------------------------------------------------------------------------------------------------------------------------------------------------------------------------------------------------------------------------------------------------------------------------------------------------------------------------------------------------------------------------------------------------------------------------|

TatEnzMtp06      AMO02513.1      0      PF01421, PF00200      --      Disintegrin-like

MEWLVRSDALLGRLVCFHIVLRTCSTLRSKDVRSEFHNH  
YVIQPKLHTLDGRERRDVNGAKEVPKDNLMVMTFEVLGE  
EFVLDLKMNTDLLPENYFEKYQLNSRTILNKPMMKFR  
HCHYLQIRGIPTSWAAISMCRGINGMVF DGKENYYVH  
AVNESNHILLKASDWKANNLTCGYKEHYDSNLSQML  
NNIKRNRRSAVIQPPSGSSDSRYVELILVNDYKEFKELN  
EDVESVFERSKQIANILNGLYIPLNIYIALVG VITWTEKDP  
IVMSPDGDATLTNFLHYRRQRLAREHPNDNAQLITAMT  
FDGGVVGKALKGPICTYEYSGGVNMDHSHIVGLVATT  
V  
AHELGHNF GMEHDTDECECPEDKCIMAPASSATSPHHW  
SSCSREYVHMAFQHGMDYCLRNVP SNIVGPICGNGFLE  
DGEECDCGLKEFCNNLCCNATT CRLNPNATCATGLCCD  
VHTCKMKHVATLCRGSVSECDLPEYCDGVTEYCPSDV  
HVQDGTDCGDGKG YCYD GACQSHSNQCKLLWGSTGK  
TSHHHCYDQNSNGNVNGNCGYNRINKTYKACAKKDVR  
CGMLQCTHLNERLEFGMPSAAILSRSFINVQ GKILPCRT  
AVIDLGLTSDVPGLTPNGAKCGDGMACLNQKCVPSHL  
RKKTCSQNCNDNGICNNRINCHCNYGYGPPHCDGP GHG  
GSIDSGPPSDPNAGQSFFIAMLIIFLGIIPFIAITAYVVYHY  
NHHLKNWWLLKIRKEPKKPPEPKSAPPPKKFNYPHGT  
V  
KKLEISAPFLQHGPSDPIVTVPLETAQRHIHNGNLPIKAT  
TSQETPRPVPLRAAPPVPPGPVQRSHSSVGATSSNRRASR  
PLSEASF SKRNLPPPPRPPPKHLKPSVRPQSFSAGSNRVT  
ANDNATNVNNVELSRKGSNASNQNVKKATATNNASVS  
AAASVGKPNRQTKPNSAFKPARNSDPNVGR TNSGQISR  
VASLTQRFEQQGGVNAKV

ATGGAGTGGTTAGTGC GAAGTGATGCTTTGTTGGGGAGATTAGTTTG  
CTTTATCATCGTTCTGCGCACTTGTTCAACATTAAGAAGTAAAGATGT  
CCGCTCCGAGTTCCACAACCATTCGTCATCCAACCGAAACTCCACA  
CCCTGGACGGAAGGGAGAGGCGAGACGTTAACGGCGCAAAGGAAGT  
CCCCAAAGATAATTTAGTTATGACATTTGAAGTACTTGGTGAAAGAA  
TTGTGCTAGATCTAAAAATGAATACAGATCTACTGCCAGAAAACCTAC  
TTTGAAAAATATCAACTTAATTCACGCACAATTTTAAATAAACCAAT  
GAAAAAGTTCAGGAGACACTGTCATTACTTAGGGCAGATCCGAGGC  
ATTCTACTTCTTGGGCGGCTATAAGCATGTGTCTGGAATCAATGG  
AATGGTATTTGATGGAAAGGAAAAATTATTATGTTCATGCAGTTAATG  
AAAGCAATCATATTCTACTTAAAGCTTCTGACTGGAAGCAACAAT  
CTCACTTGGCGGTACAAAGAACACTATGATAGCAATCTAAGATCTCA  
AATGTTAAACAATATAAAGAGGAATCGTCGATCAGCTGTGATACAGC  
CACCATCAGGATCTTCCAGTGACTCCCGCTATGTAGAGCTAATACTT  
GTCAATGATTATAAGGAGTTCAAAGAACCTTAATGAAGATGTTGAAAG  
TGTTTTGAAAGAAGTAAACAAATTTGCTAATATCTCAATGGGCTAT  
ATATTCCACTCAATATTTATATTGCATTGGTTGGTGCTATTACCTGGA  
CAGAAAAAGATCCAATTGTAATGTCTCCAGATGGTGATGCAACTCTC  
ACTAATTTCTTCACTATCGTCGGCAACGTTTAGCACGTGAGCATCCA  
AATGATAATGCCAGCTAATTACAGCTATGACATTTGATGGTGAGT  
AGTAGGCAAAAGCACTAAAGGGACCAATATGTACATATGAATACTCT  
GGGGGAGTTAATATGGATCATAGCCACATTTGGGCTCTGTAGCTAC  
TACTGTTGCACATGAACTTGGGCATAATTTTGGAAATGGAGCATGACA  
CAGATGAGTGTGAGTGTCCAGAAGATAAATGCATAATGGCCCCAGCT  
TCCAGTGCTACAAGTCCACATCATTGGTCATCATGCTCAAGAGAATA  
TGTCATATGGCATTTACGATGGGATGGACTATTGCTAAGAAATG  
TTCTTCAAATATTGTTGGACCAATTTGTGGAAATGGATTTTGAAG  
ATGGGGAAGAGTGTGACTGTGGATTAAGGAGTTTGTGAATAATCTT  
TGTTGTAATGCAACAACCTGTGCGATAAATCCATAATGCCACTTGTGT  
ACAGGACTGTGTTGTGATGTTACATACATGCAAGATGAAGCATGTTGC  
TACTCTGTGCCGTGGCTCAGTTTCTGAATGTGACCTTCTGAATCTG  
TGATGGAGTAACAGAGTATTGCCCATCTGATGTTTCATGTCCAAGATG  
GAACTGATTGTGGAGATGGAAGGGTATTGCTATGATGGAGCATGT  
CAGTCACATAGTAACCAAGTGCAAGCTATTATGGGGATCAACTGGTAA  
AACCTCTCATCATCACTGCTATGATCAAAAATAGTAATGGAAATGTTA  
ATGGAAAATTGTGGTTACAACAGAAATTAATAAGCACTATAAAGCTGT  
GCTAAAAAGGATGTCCGTTGTGGAATGCTTACGTGACGCACACATGGA  
TGAACGACTTGAATTTGGTATGCCTTCAGCTGCTATTTTATCAAGATC  
ATTCATAAATGTGCAAGGGAAAAATCTTCCATGTGCAACAGCTGTCA  
TTGATTTAGGACTACGTCAGTTGATCCAGGCCTAACCCCAATGGA  
GCAAAAGTGTGGTGATGGCATGGCATGTCTGAACCAAAAGTGTGTGCC  
AGTTTCTCACTTGAGGAAGAAAACCTGTGCGCAAACTGCAATGACA  
ATGGGATATGCAATAACCGTATTAACTGTCATTGTAATTACGGTATG  
GGCCACC GCATTTGTGATGGCCAGGTATGTTGGCAGTATAGATAG  
TGGACCACCATCTGATCCAACCGTGGACAGAGCTTTTTCATTGCAA  
TGCTTATCATCTTTCTTGGTATCATACCATTCTATTGCCATCATGCA  
ATGTTGTGTATCACTACAACCATCATCTCAAGAATTGGTGGCTTCTTA  
AGATAAGGAAGGAACCAAGAAGCCACCTGAACCTAAAAGTGCACC  
TCCACCAAAAGAAATTCAATTATCTCATGGGTACAGTAAAAAAGTTGG  
AAATATCAGCTCCATTCTACAACATGGCCCTTCTGATCCTATAGTAA  
CAGTCCCATTGGAAAACAGCACAGAGGCATATTCACAATGGCAATTTG  
CCAATTAAGGCAACAACGTACAAGAACTCCTCGTCCTGTGCCTCT  
CAGAGCTGCTCCACAGTCCACCTGGACCAGTGTCAGAGATCTCATT  
CATCAGTTGGTGAAACGTATCAAAATCGAAGAGCTCTCGACCCCTG  
AGCGAGGCATCCTTTAGTAAGCGTAATTTACCGCTCCACCTCGTCC  
ACCACCACCTAAACATTTAAACCAAGTGTTGCAACACAGTCTTTCA  
GTGCAGGTAGTAATAGGGTGACAGCAAAATGACAAATGCAACAAATGT  
TAATAATGTAGAAGTGAAGTCGGAAGGTAGTAATGCTTCTAATCAGA  
ATCAAGTTAAAAAGACTGCAACGAATAATGCTTCTGTGAGTGACGCA  
GCTTCTGTAGGAAAGCCTAATAGACAGACAAAACCCAACAGTGCCTT  
CAAACCAAGCAAGGAATTCAGATCCTAATGTTGGAAGGACCAATGT  
GGACAAATATCGAGGGTAGCATCATTAAACACAACGGTTTGAGCAAC  
AGGGTGGTGTAATGCTAAAGTATAA

|             |                |   |                     |    |                  |                                                                                                                                                                                                                                                                                                                                                                                                                                                                                                                                                                                                                                                                                                                                                                                                                                                                                                                                                                                                                                                                                                                                                                                                                                                                                                                                                                                                                                                                                                                                                                                                                                                                                                                                                                                                                                                                                                                                                                                                                                                                                                                                                                                                                                                                                                                                                                                                                                                                                                                                                                                                                                                                                                                                                                                                                                                                                                                                                                                                                                                                                                                                                                                                                                                                                                                                                                                                                                                                                                                        |
|-------------|----------------|---|---------------------|----|------------------|------------------------------------------------------------------------------------------------------------------------------------------------------------------------------------------------------------------------------------------------------------------------------------------------------------------------------------------------------------------------------------------------------------------------------------------------------------------------------------------------------------------------------------------------------------------------------------------------------------------------------------------------------------------------------------------------------------------------------------------------------------------------------------------------------------------------------------------------------------------------------------------------------------------------------------------------------------------------------------------------------------------------------------------------------------------------------------------------------------------------------------------------------------------------------------------------------------------------------------------------------------------------------------------------------------------------------------------------------------------------------------------------------------------------------------------------------------------------------------------------------------------------------------------------------------------------------------------------------------------------------------------------------------------------------------------------------------------------------------------------------------------------------------------------------------------------------------------------------------------------------------------------------------------------------------------------------------------------------------------------------------------------------------------------------------------------------------------------------------------------------------------------------------------------------------------------------------------------------------------------------------------------------------------------------------------------------------------------------------------------------------------------------------------------------------------------------------------------------------------------------------------------------------------------------------------------------------------------------------------------------------------------------------------------------------------------------------------------------------------------------------------------------------------------------------------------------------------------------------------------------------------------------------------------------------------------------------------------------------------------------------------------------------------------------------------------------------------------------------------------------------------------------------------------------------------------------------------------------------------------------------------------------------------------------------------------------------------------------------------------------------------------------------------------------------------------------------------------------------------------------------------------|
| TatEnzMtp07 | XP_021004202.1 | 0 | PF01421,<br>PF00200 | -- | Disintegrin-like | <p>MHWIYIVIIFFCYGTTILRICALLKRKREADSFPPDDVGDENWPVAEADRLRRIYPENERLIANIPSRFFEVIYPVQVRQHQLKGISTRDATANKVSLPSTGKHFHQTSLLVKAFNYKFRLELELNMYLLAPNLQKHFLPEGAQQISTQEIEHCYYHAVIKDYPGALAAALRTCNGVSGHHVSNETFVIHPFYGGDLSRKHPHVIYRYFGEAKEKHMCGNTGMHEWGFQFRIQPGRIKRDVREVFKFIELALVLDQAMFDNRNATRSEVVNDAIQVVNCVDMYFRTVNTRVSVLYVETWAHGDQMEINN DVRQTLNFMEYASRKLYKVAKDATHLLTGHFKGAEVGMSVPDSICTAKAVGVSQDTNIHEPHLVASTMTHMLGHNIGMSHDQYDNNDCECQDWWGCIMAQTILGQNRIPYHFSKCSFQDYINALRIGHGICLFNKPQNLEDFRSCGNKLVEEGEQDCGSDIDEHDDQCCDPITCKLRVEAECSKGPCCADCKLKASGQPCREAIDECPIPEYCNGRDGCPTDLFKRNGALCKNGIGFCFNGRCPADERCEYIWDGAVSSDIQCYEQFNTQGSLNGHCGTDGKGGYIKCTEENILCGTVQCQQGRRPVPIVQGMNKQYARTIVSIGGAIEYECKVASGNLDLDIVDLGMMPDGSKCAENKICVNQTCRLRLDLFVEPGSCLSNVALPCSGHGVCSNINTFCDEGWTAADCSQRLNGDDPAADHTDEPFGGGNHAYIPVSTTQGSASENGQNLKKTPKSTTYGKKDALSAPSLVVVLVSVVGGVFIFFALLATCYREDKQRQQLQLKDTLSSEEGESH</p> <p>ATGCATTGGATATATATAGTTATCATATTTTCTGTTATGGAACAACGTTACGGATCTGCGCTTTGTTGAAGAGGAAAAGAGAAGCTGATTCATTCCCTTTTGATGATGTTGGAGATGAGAATTGGCCTGTTGCTGAGGCTGATCGCTTAAGCGCAATATATCCAGAGAATTGAACGTCTCATAGCCAACATTCCGAGTCGTTTCTTTGAAGTTATCTATCCTGTGCAGGTACGACAGCATCAAAAAGCTGGGTATTTCCACAAGGGATGCCACAGCCAACAAAAGTAAGCCTCCCTAGTACTGGCAAGCATTCCATCAGACATCCCTCCTGTGTCAAAGCTTTCAATTACAAATTCCGTCTTGAATTGGAATTGAATATGTACCTTTTGGCACCAAACCTTATCCAAAAGCATTTTTTGCTGAAGGAGCAACAACAAATATCTACTCAGGAAATAGAACATTGTTACTATCATGCTGTTATCAAAGATTATCCAGGTGCTCTTGCTGCACCTAGGACCTGTAA TGGAGTTAGTGGCATTATTCATGTGTAATGAAACTTTTGTAATTCA TCCTTTCTATGGAGGTGATCTTTCTAGGAAGCATCCACATGTAATTTA TCGATATTTTGGTGAAGCAAAAGAAAAACATATGTGTGGAAATACA GGAATGCATGAATGGGGCTTCAAACAATTTAGAATACAACCAGGAA GAATTAAGCGGGATGTACGAGAAGTTTTCAAATTCATAGAACTTGCT TTAGTGTTAGATCAGGCAATGTTTGACAATCGGAATGCAACTAGATC TGAAGTAGTAAATGATGCTATCCAGGTGTTAATTGTGTGGATATGT ACTTTTGAAGTGTAACTAGAGTATCTGTTTTGTATGTGGAGACAT GGGCTCATGGTGATCAAATGGAAATTAACAACGATGTACGACAGAC ATTGCTAAACTTTATGGAATATGCTTCCCGAAAAATTATATAAAGTTG CAAAGGATGCCACCCATTTATTAACAGGCCATCATTTTAAAGGTGCT GAAGTGGGCATGTCTGTGCCAGATAGTATTTGTACAGCTAAAGCAGT TGGAGTTAGTCAAGATACCAATATCCATGAACCCCATCTAGTAGCAA GTACGATGACTCATATGTTAGGACACAACATTGGAATGAGCCATGAC CAGTATGATAATAATGATGAATGTGAAGATGTCAAGATTGGTGGGGTG CATTATGGCACAACAATCTGGGTCAAAATAGGATACAACCATATC ACTTTTCCAAGTGTAGCTTTTCCAGGATTATATTAATGCTCTTCGCA TTGTCATGTATCTGTCTATTCAACAAGCCAAATCAGCTAGAACACTTC AGGAGTTGTGGAATAAAGCTAGTTGAAGAAGGTGAACAGTGTGATT GTGGTAGTATTGATGAATGCTTAGAACATGATCAGTGTGTGATCCT ATCACTTGCAAGCTGCGAGTTGAAGCTGAATGCTCCAAGGTCCATG CTGTGCTGACTGCAAGCTAAAGGCTAGTGGACAACCCTGTGCGAGAGG CAATTGATGAGTGTGATATTCAGAATATTGTAATGGACGTGATGGG CAGTGTCCAACCTGACTTGTTCAGAGAAATGGTGCCTGTGTAAAAA TGGAAATTGGTTTTTGTCTCAATGGTAGATGCCAAGTGTGATGAAC GTTGTAATACATTTGGGATTTTGGTGCAGTATCCTCAGATATCCAAT GTTATGAACAGTTTAAACACACAAGGAAGTCTAAATGGTCATTGTGGC ACTGATGGAAAAGGTGGATACATCAAGTGTACAGAAAGAAATATTC TCTGTGTTACTGTTCAAGTGTGCAAGGTAGACGTGTGCCTATTGTG CAAGGAATGAATAAACAGTATGCACGTACAATTGTATCTATTGGTGG GGCAGAGTATGAATGCAAAAGTTGCTAGTGGAAATCTGGACTTAGATA TAGTTGACCTTGGAAATGATGCCTGATGGCTCAAAGTGTGCTGAAAAA T AAGATATGTGTGAATCAGACTTGCTCAGGTTAGATCTGTTTGTGGA GCCAGGTAGCTGTCTGTCCAATAATGTTGCACTTCTTGTCTGTGGCCA TGGTGTATGTTCAAATATTAATACTTGTCTTTGTGATGAGGGCTGGAC AGCAGCAGATTGTAGCCAACGTTTAAATGGTGTGATCCTGCAGCTG ATCATACTGATGAACCTTTTGGAGGAGGAAACCATGCTTATATCCCT GTCTCAACTACGCAAGGATCTGCATCAGAAAAATGGACAAAAATCTAA AAAAGACACCAAAGTCAACAACCTTACGGGAAGAAGGATGCTTTAAG TGCACCATCACTTGTGGTTGTGCTCGTTTCAGTTGTTGGAGGGGTTTT TATATTCTTCGCTCTACTAGCAACATGCTACAGGGAAGACAAACAAA GGCAGCAACTGCAGTTAAAAGACACTTCACTTTCTGAAGAAGGGGA AAGTCAT</p> |
|-------------|----------------|---|---------------------|----|------------------|------------------------------------------------------------------------------------------------------------------------------------------------------------------------------------------------------------------------------------------------------------------------------------------------------------------------------------------------------------------------------------------------------------------------------------------------------------------------------------------------------------------------------------------------------------------------------------------------------------------------------------------------------------------------------------------------------------------------------------------------------------------------------------------------------------------------------------------------------------------------------------------------------------------------------------------------------------------------------------------------------------------------------------------------------------------------------------------------------------------------------------------------------------------------------------------------------------------------------------------------------------------------------------------------------------------------------------------------------------------------------------------------------------------------------------------------------------------------------------------------------------------------------------------------------------------------------------------------------------------------------------------------------------------------------------------------------------------------------------------------------------------------------------------------------------------------------------------------------------------------------------------------------------------------------------------------------------------------------------------------------------------------------------------------------------------------------------------------------------------------------------------------------------------------------------------------------------------------------------------------------------------------------------------------------------------------------------------------------------------------------------------------------------------------------------------------------------------------------------------------------------------------------------------------------------------------------------------------------------------------------------------------------------------------------------------------------------------------------------------------------------------------------------------------------------------------------------------------------------------------------------------------------------------------------------------------------------------------------------------------------------------------------------------------------------------------------------------------------------------------------------------------------------------------------------------------------------------------------------------------------------------------------------------------------------------------------------------------------------------------------------------------------------------------------------------------------------------------------------------------------------------------|

TatEnzMtp08      XP\_021000996.1      0      PF13574      --      Disintegrin-like

MIQNKFFLSLLVCFVTGGETGRLNQYISYFEPLRYNHET  
VHQGHLRAKRSPSDSLVYVNFHAHGRHFNIRLKRDTSA  
FAPDVVIETTNGVAEVDTSPLYDGHLLGESGSTVYGSIR  
NGVFEGKIHTPNKVYYVERSHKYFSSNPQPFHSHVYSSD  
DVEDPYADKRESHAGGCGITEDVLQWMQEVSNSADPK  
EMSPTNKTNPESHLETSERSTAAENAPHNIYTREAQRD  
INQIDQLQAKRACTLYVQTDVFLWKHILTYEKTASSARE  
EISSLSIQHVRAVNYIYENTDFDGYRGIKFVVQRIKINDT  
SSCSNQGLDYKRTNPFCSPNIDVSNFLNLSQFNHDDFC  
LAYIFTYRDFSGGTLGLAWVASASGASGGICEKYKPYN  
ENINGRQVQTKRSLNTGVITFVNYSRVPPKVSELTLAH  
EIGHNFGSPEVMVLSVVIKLWKILKNATVGMMQRNAM  
MNAAIHETSLFSK

ATGATACAAAACAAGTTCTTTTGTCACTGCTTGTGTTTGTGAC  
GGAGGTGAAACCGGTGCTTAATCAGTATATAAGTTATTTTGAGCC  
ACTGAGGTACAACACGAACTGTACATCAAGGTCATTACGTGCCA  
AACGTTACCTTCAGATTCCTTAGTTATGTGAATTTCCATGCACATG  
GAAGGCATTTTAATATTCGACTTAAAAGGGACACATCAGCTTTTGT  
CCAGATGTTGTTATAGAACTACTAATGGTGTAGCAGAAAGTTGACAC  
ATCCCCTTATATGATGGGCATTGTTAGGGGAATCAGGATCCACTG  
TATATGGCTCAATAAGGAATGGTGTATTTGAGGGAAAGATTCATACA  
CCGAACAAAGTTTATTATGTAGAACGCTCTCACAATATTTTTCATCA  
AACCTCAACCATTTCACTCTGTGATATACTCATCAGATGATGTGGA  
AGATCCATATGCTGACAAACGGGAGTCACATGCAGGTGGATGTGGC  
ATCACAGAGGATGTTTTACAGTGGATGCAAGAAGTTAGCAATTGAGC  
AGATCCTAAAGAAATGTCCCCTACAAACAAGACAAACCCGGAGCAG  
TCTCATTTGGAAAGAAGTGAACTTCAACAGCTGCGGAAAAATGCACC  
TCATAATATCTATACAAGAGAAGCGCAACGTGATATTAAATCAGATAG  
ACCAATTACAAGCAAAAAGAGCATGTACATTATATGTGCAAAACAGA  
TGTATTTCTATGGAAGCATATTTGACGTATGAAAAAACTGCTAGTA  
GTGCACGAGAAGAAATATCTTCATTAATATCTCAACATGTGAGAGCC  
GTAACTATATTTATGAAAATACTGACTTTGATGGCTATCGGGGCAT  
AAAGTTTGTGGTGCAAGAATTAAGATAAATGACACATCATCGTGTT  
CCAATCAAGGGTTGGATTACAAACGAACAAATCCATTCTGCTCGCCA  
AATATTGATGTATCAAACTTTTAAATTTGAATTCATTCACCAT  
GATGATTCTGTTTAGCATACATTTTACGTACAGAGATTTCTCTGGT  
GGTACATTAGGACTTGCATGGGTTGCATCAGCATCAGGTGCTTCTGG  
AGGAATCTGTGAGAAATACAAGCCATACAATGAAAAATATTAATGGC  
AGACAAGTACAAACCAAAAAGAAGCCTGAACACTGGTGTGATTACCT  
TTGTCAATTACAACAGCCGAGTACCTCCAAAAGTGTCAGAATTGACA  
TTGGCTCATGAAATTGGACACAACCTTTGGTTACCTGAAGTGATGGT  
GCTTTCTGTGGTAATAAAATTGTGAAAAATACTGAAGAATGCGACTG  
TGGGTATGATGCAAGGAATGCAATGATGAATGCTGCTATCCACGAG  
ACGTCACTCTTTTCCAAATGA

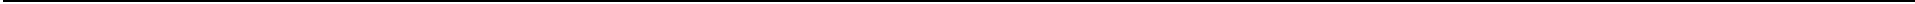

|             |                |   |         |    |                  |                                                                                                                                                                                                                                                                                                                                                                                                                                                                                                                                                                                                                                                               |                                                                                                                                                                                                                                                                                                                                                                                                                                                                                                                                                                                                                                                                                                                                                                                                                                                                                                                                                                                                                                                                                                                                                                                                                                                                                                                                                                                                                                                                                                                                                                                                                                                                                                                                                                                                                                                                                                                                                           |
|-------------|----------------|---|---------|----|------------------|---------------------------------------------------------------------------------------------------------------------------------------------------------------------------------------------------------------------------------------------------------------------------------------------------------------------------------------------------------------------------------------------------------------------------------------------------------------------------------------------------------------------------------------------------------------------------------------------------------------------------------------------------------------|-----------------------------------------------------------------------------------------------------------------------------------------------------------------------------------------------------------------------------------------------------------------------------------------------------------------------------------------------------------------------------------------------------------------------------------------------------------------------------------------------------------------------------------------------------------------------------------------------------------------------------------------------------------------------------------------------------------------------------------------------------------------------------------------------------------------------------------------------------------------------------------------------------------------------------------------------------------------------------------------------------------------------------------------------------------------------------------------------------------------------------------------------------------------------------------------------------------------------------------------------------------------------------------------------------------------------------------------------------------------------------------------------------------------------------------------------------------------------------------------------------------------------------------------------------------------------------------------------------------------------------------------------------------------------------------------------------------------------------------------------------------------------------------------------------------------------------------------------------------------------------------------------------------------------------------------------------------|
| TatEnzMtp09 | XP_021000340.1 | 0 | PF13582 | -- | Disintegrin-like | SDSSHIEPYSTRHLFRHGKSPSVFPVAKRPMYLC SILLAT<br>LWICGVYTYQNIKVHERMTPEELRQIFHVDLHNEVPEY<br>DVVNVRLSKRSTPSGNRKQLHLSAFGKKLHLNLKKNE<br>EFENKLASMKVFEAETNQNLKYREMEPQEHASDMGV<br>SFQDEQQMAAVLVRHSDSGTVQVEGTIGNNLVIKVPVPS<br>LVAFDDAYVDDMFLDEDGINSTKPSQRHLPILNATSHII<br>YMRKGYGSEQLSDYMDLESGHTDKQNWMTMRSPRVKR<br>KAPSTVFPEVLVVVDYNTLLMHGSDSRALKRYFVSFWN<br>GVDLRYKTLNPRVKVSLAGMVVAKDKDATPYLEKNR<br>LRPPNYDAVDAAGALSDMGKYL YREDRLPTFDVAVVIT<br>KLDMCRRQFNGGRCSRGTAGFAYVGGACVVNKRLEKV<br>NSVAIIEDSGGFSGIIVAAHEVGHLLGCVHHDGSPPSYLG<br>GPGATSCPWEDGYIMSDLRHTDRGFKWSPCSVQQFKHF<br>LHGETAVCLYNYPHDNQALARILPGTTMSLDDQCRKDR<br>GTTACFKDARVCAQLFCYDTSSGFCVSFRPAAEGSTCG<br>HGQVCR | TCGGATTCAAGTCACATCGAACCATATTCCACCCGCCATCTTTCCGG<br>CACGGA AAAAGTCCGTCCGTATTTCCGGTGGCAAAACGACCCATGTA<br>CCTGTGTTCCATTCTCTTAGCCACTCTGTGGATATGTGGCGTATATAC<br>GTATCAAAATATAAAAGTTTACGAAAGGATGACGCCCGAAGAATTA<br>AGACAAATATTTTCATGTGGATTTACATAACGAAGTGCCGGAATATGA<br>CGTCGTTAACGTTTCGATCCTTGTCAAAACGTTTCAACGCCCTCTGGCA<br>ACAGGAAACAGCTGCATCTATCAGCGTTTCGGGAAAAAATTGCATTTA<br>AATTTAAAAAAGAATGAAGAATTTGAAAAACAAGTTGGCATCGATGA<br>AAGTATTTGAAAGCAGAAACCAATCAAAATGGACTTAAATATCGAGA<br>AATGGAACCAACAAGAGCACGCGTCTGACATGGGTGTTAGTTTCCAAG<br>ATGAGCAACAGATGGCAGCAGTATTAGTAAGACACTCAGACAGCGG<br>AACAGTACAAGTGGAAGGCACAATCGGTAAACACCTTGTAAATAAA<br>CCAGTACCTCCATCGTTGGTTGCATTTGATGATGCTTACGTTCGATGAC<br>GAGATGTTCTTGATGAAGATGGAATTAATAGTACAAAGCCAAGTCA<br>GCGCCATCTACCGATACTAAATGCAACTAGTCATATCATTATATGA<br>GAAAAGGATATGGTTTCGGAACAACCTTAGTGATTACATGGATTGGAA<br>AGTGGTCATACAGACAAGCAAACTGGACAATGAGGAGTCCAAGAG<br>TCAAAAGAAAAGCTCCTTCAACCGTTTTTCTGAGGTTTTAGTAGTTG<br>TGGATTATAATACTCTGTTGATGCACGGAAGTGATAGTCGGGCATTA<br>AAAAGATACTTTGTCAGTTTTTGGAACGGGTAGATTGCGTTACAA<br>GACACTCTCGAATCCTAGGGTTAAAGTTAGTTTAGCTGGGATGGTAG<br>TGGCAAAAGGATAAAGATGCTACGCCTTATCTAGAAAAGAATCGCCTT<br>AGGCCACCAAATTACGATGCTGTGGATGCTGCGGGAGCCTTGCTCTGA<br>CATGGGAAAGTACTTATATAGAGAAGACAGGCTACCGACCTTCGATG<br>TTGCTGTTGTCATCACTAAATTAGATATGTGTAGAAGACAGTTCAAT<br>GGGGGACGATGTAGCCGTGGAAGTGCAGGTTTTCGCTTATGTGGGTGG<br>TGCTTGTGTAGTTAATAAAAGACTAGAAAAAGTAAACAGTGTTGCCA<br>TTATCGAGGACAGTGGTGGATTTAGTGGTATCATTTGTAGCAGCTCAT<br>GAGGTTGGCCACCTGTTAGGCTGCGTTACAGATGGCTCCCAACCAACC<br>CAGTTACTTAGGAGGACCAGGTGCTACCAAGTTGTCCATGGGAAGATG<br>GTTATATCATGAGTGACCTTCGACACACTGATAGGGGGTTCAAATGG<br>TCACCTTGACGCGTACAGCAGTTTAAACATTTTTACATGGAGAAAC<br>TGCTGTGTGCTTTTCAACTATCCTCATGACAACCAAGCTCTAGCAA<br>GAATATTACCTGGAAGTACGATGTCTTTGGATGATCAATGTAGAAAG<br>GATAGAGGCACCACTGCTTTTAAAGATGCCAGAGATGTGCGCA<br>GTTATTTTGTATGATACATCATCAGGCTTCTGTGTGTCGTTCAAGCC<br>AGCAGCAGAAGGTTTCTACTTGCGGCCATGGTCAAGTATGCCGA |
|-------------|----------------|---|---------|----|------------------|---------------------------------------------------------------------------------------------------------------------------------------------------------------------------------------------------------------------------------------------------------------------------------------------------------------------------------------------------------------------------------------------------------------------------------------------------------------------------------------------------------------------------------------------------------------------------------------------------------------------------------------------------------------|-----------------------------------------------------------------------------------------------------------------------------------------------------------------------------------------------------------------------------------------------------------------------------------------------------------------------------------------------------------------------------------------------------------------------------------------------------------------------------------------------------------------------------------------------------------------------------------------------------------------------------------------------------------------------------------------------------------------------------------------------------------------------------------------------------------------------------------------------------------------------------------------------------------------------------------------------------------------------------------------------------------------------------------------------------------------------------------------------------------------------------------------------------------------------------------------------------------------------------------------------------------------------------------------------------------------------------------------------------------------------------------------------------------------------------------------------------------------------------------------------------------------------------------------------------------------------------------------------------------------------------------------------------------------------------------------------------------------------------------------------------------------------------------------------------------------------------------------------------------------------------------------------------------------------------------------------------------|

---

|             |                |        |         |    |                  |                                                                                                                                                                                                                                                                                                                                                                                                                                                                                                                                                                                                                                                                                                                                                                                                                                                                                                                                                                                                                                                                                                                              |                                                                                                                                                                                                                                                                                                                                                                                                                                                                                                                                                                                                                                                                                                                                                                                                                                                                                                                                                                                                                                                                                                                                                                                                                                                                                                                                                                                                                                                                                                                                                                                                                                                                                                                                                                                                                                                                         |
|-------------|----------------|--------|---------|----|------------------|------------------------------------------------------------------------------------------------------------------------------------------------------------------------------------------------------------------------------------------------------------------------------------------------------------------------------------------------------------------------------------------------------------------------------------------------------------------------------------------------------------------------------------------------------------------------------------------------------------------------------------------------------------------------------------------------------------------------------------------------------------------------------------------------------------------------------------------------------------------------------------------------------------------------------------------------------------------------------------------------------------------------------------------------------------------------------------------------------------------------------|-------------------------------------------------------------------------------------------------------------------------------------------------------------------------------------------------------------------------------------------------------------------------------------------------------------------------------------------------------------------------------------------------------------------------------------------------------------------------------------------------------------------------------------------------------------------------------------------------------------------------------------------------------------------------------------------------------------------------------------------------------------------------------------------------------------------------------------------------------------------------------------------------------------------------------------------------------------------------------------------------------------------------------------------------------------------------------------------------------------------------------------------------------------------------------------------------------------------------------------------------------------------------------------------------------------------------------------------------------------------------------------------------------------------------------------------------------------------------------------------------------------------------------------------------------------------------------------------------------------------------------------------------------------------------------------------------------------------------------------------------------------------------------------------------------------------------------------------------------------------------|
| TatEnzMtp10 | KFM63257.1     | 5 e-25 | PF13582 | -- | Disintegrin-like | <p>RKPSMLSLFLLASFTFVIGKAQDHEIVYPRMIIIRSGEKR<br/> VLFRAFD R D F R L R L E P V D A L T D D L V V H T T D D N G E E V F Y<br/> K P N V D N L R E T I L Q D P N V G A T I S I D D N G P L K I K G V I N E K L R<br/> I E P D V S S H H K G G H H G G H Y G K K G K K G K Y Y G K Y M R Q Y D<br/> E F S E G I E Q E R E D P M E Q I P H R V Y E V T Q R I N D P E F F Y D E I M P<br/> P D L K Y N L S N E K T I E N R A D I I I V E V A V V S D V E H S K M L G S N<br/> D D C A V Y H V I L M N S V N L R F R T M E K T N I R F L L T D I V R N Q P G<br/> Q Q P Y I D G C M V D G H A L S S E T L Y A L C K Y V Y D N P T K F Q A D I<br/> V H L V T K T P L G D L D K S T N T I N P G V I G I A F V G A A C N R K Y K C<br/> G I S E D D G S C F S G S S T I A H E N G H L L G C S H D G D P C A Y D G C P<br/> G S T Q C S W N D G F I M S Y V R N N E D Q Y A F S S C D D C V S Y F A S<br/> L R S S Y C L S V N N T K R I V N V Y D N R L S G T F L K E K W G T T T S E S<br/> Y Y D I K C K K A R V D W S I Y R Y F P G C C I D A Y Y C R T V A D S R G S<br/> F Y Y W K C N A D D G P C N E N K H C E N G Y C V D N</p> | <p>CGAAAGCCGAGTATGCTGTCTTGTTCCTATTAGCAAGCTTTACTTTT<br/> GTTATTGGTAAAGCCCAAGATCATGAAATCGTTTATCCACGTATGAT<br/> CATAAGCCGATCCGGTGAAAAACGAGTGCTTTTTCGAGCATTGACC<br/> GAGATTTTCGTTTAAAGATTAGAACCAGTCGATGCGTTAACACAGCGAT<br/> TTGGTAGTTTACACGACAGACGATAATGGAGAAGAAGTCTTTTATAA<br/> GCCCAATGTTGACAATTTGAGAGAAACCATTCTACAGGATCCAAATG<br/> TTGGAGCCACCATCTCCATTGACGATAATGGACCTCTGAAGATTAAA<br/> GGAGTCATCAATGAGAAATTGCGTATTGAACCAGATGTGAGCAGCC<br/> ATCATAAAGGCGGACATCATGGAGGACATTATGGAATAAAGGGAA<br/> AAAAGGCAAACTACTATGGGAAATATATGCGCCAATATGATGAATTTA<br/> GTGAAGGAATAGAACAAAGAAAGAGAAGATCCTATGGAACAGATTCC<br/> GCATAGAGTATATGAGGTCACTCAGAGGATTAACGATCTCGAATTTT<br/> TTTATGATGAAATCATGCCTCTGTATCTCAAGTATAACTTATCCAATG<br/> AGAAAACTATTGAAAACCGTGACAGACATAAATACTGTGGAAGTTGCT<br/> GTGGTTTCAGACGTTGAACATTCAAAAATGCTTGGTTCAAACGACGA<br/> TTGCGCTGTATATCATGTCATCTTAATGAATTCGGTTAACTTAAGGTT<br/> TCGAACCATGGAAAAAACCAACATAAGATTTTGTTAACGTGATATTG<br/> TGAGAAACCAACCAGGGCAACAGCCATACATTGATGGTTGATGGTC<br/> GATGGTCATGCTCTATCGAGCGAAACTTTATACGCTTTTGICAAATA<br/> TGTGTATGATAACCCAACGAAATTTCAAGCAGATATTGTTCACTTAG<br/> TAACTAAGACACCAATTGGGAGACCTGGACAAATCAACCAATACAAT<br/> AAATCCTGGTGTTATAGGAATTGCCTTCGTAGGAGCAGCTTGTAACA<br/> GAAAGTATAAGTGTGGTATTCTGAAGATGATGGTAGCTGCTTTAGT<br/> GGAAGTTCAACCAATTGCCCATGAGAAATGGTCATTTACTTGGTTGTTCC<br/> CATGATGGAGATCCATGTGCCTATGATGGATGTCCCGGATCAACACA<br/> ATGCTCTTGGAAATGATGGTTTTATAATGAGTTATGTGAGAAATAACG<br/> AAGATCAATATGCGTTCTCATCGTGTGCGACGATTGCGTATCGTATT<br/> TTGCATCGTTACGCTCCTCTTACTGCCTGTCAGTAAACAATACTAAAA<br/> GGATAGTTAACGTTTATGATAATCGTCTGTCTGGAACCTTTTTTAAAG<br/> AAAAATGGGGAACCAACACATCAGAAAGTTATTACGATATCAAAATG<br/> CAAGAAAGCAAGAGTTGATTGGTCTATTTATCGATATTTTCTGGTTG<br/> CTGTATAGATGCATATTACTGTAGAACAGTAGCAGATAGTCGTGGTT<br/> CTTTCTATTATTGGAAGTGCAATGCCGACGATGGAGACCTTGCAAT<br/> GAGAACAACACTGCGAGAACGGATATTGTGTTGACAAT</p> |
| TatEnzMtp11 | AMO02515.1     | 1 e-93 | PF01421 | -- | Disintegrin-like | <p>GNTGMHEWGFQFRIRPAKLKRDVSQVFKYIELALVID<br/> QAMFDNRNATRSEVVNDADVQIVNCDMYFRTVNTRVS<br/> VVYVETWAHGDQIEAGSDVRQTLNLFMEYTSRKLKLYK<br/> AKDATHLITGRHFRGNEVGMAVPDSICTAKA</p>                                                                                                                                                                                                                                                                                                                                                                                                                                                                                                                                                                                                                                                                                                                                                                                                                                                                                                                                                     | <p>GGAACACAGGAATGCACGAATGGGGTTTTAAGCAATTTTCGGATAC<br/> GTCCAGCTAAGCTCAAGCGTGACGTGAGCCAGGTATTTAAATATATT<br/> GAATTGGCACTTGTGATCGATCAAGCTATGTTTGACAACGAAATGC<br/> TACCAGATCTGAAGTTGTAATGATGCTGTTCAGATAGTCAACTGTG<br/> TGGATATGATTTTCGCACAGTGAACACACGGGTTTCTGTGTGTATG<br/> TTGAAACATGGGCACATGGGGACCAAAATTGAAGCAGGCAGTGATG<br/> CGCAGAAAACCTTGCTCAATTTCTATGGAATACACATCACGCAAACTTT<br/> ATAAAGTCGCCAAAGATGCAACACATTTAATAACTGGTAGGCATTTT<br/> CGAGGCAATGAAGTTGGGATGGCTGTTCCTGATAGCATTTGCACTGC<br/> CAAAGCT</p>                                                                                                                                                                                                                                                                                                                                                                                                                                                                                                                                                                                                                                                                                                                                                                                                                                                                                                                                                                                                                                                                                                                                                                                                                                                                                                                                                                |
| TatEnzMtp12 | XP_019771969.1 | 7 e-8  | PF01421 | -- | Disintegrin-like | <p>SPYVNMA SL SILVLSTFSLYGALNGDNTKVEILAVVEK<br/> ELSDEFKLDNWRKSYFCRIFNEVQRYDYDTIEGVKIKIILS<br/> GLKIITESKDQPFIERWTWKRGNRITYLRITICLQKFSRFAR<br/> GQLWSKDYDVIFLLTRKALADIYSEIDGLAYKYGTCNFEE<br/> KFGVMVPDPKIIAHELGHLLGASNDGSRNPCCSSDDGFV<br/> MAEYSHLVTENYGRFSSCTTDAIKMHLKSPKSYCLRRN<br/> DVQNTVMCENKTSFHDICYPISSVVSRMKGGGKIDKL</p>                                                                                                                                                                                                                                                                                                                                                                                                                                                                                                                                                                                                                                                                                                                                                                                             | <p>TCGCCTTATGTTAATATGGCATCGCTTTCAATCCTAATTTTATGTTTTG<br/> AGCACCTTCTCACTTTATGGAGCTTTGAATGGTGATAAACACGAAAGT<br/> CGAAATTTCTTGCCGTTGTGGAGAAGGAACTTTCTGATGAGTTTAAAT<br/> TAGACAACTGGAGAAAATCATACTTTGTGCGTATATTCAATGAGGTG<br/> CAACGATATTACGATACCATAGAGGGAGTCAAAAATAAAAAATTATTCT<br/> CAGCGGATTAAGATTATTACGGAATCTAAGGATCAACCTTTTATTG<br/> AACGCTGGACTTGGAAGGGGAAACAGAACTTATCTAAGAACCAT<br/> ATGTCTACAGAAGTTTTTCGAGATTTCGCGGAGGGCAATTATGGGAGTA<br/> AAGATTATGACGTCATATTCTGTTAACCAAGGAAAGCTATAGCAGAC<br/> ATCTATTCTGAAATCGATGGTATAGCTTACAAGATATGGCACTGCAA<br/> TTTTGAGGAAAAAATTGGAGTAATGGTTCTGTATCCGAAAATAATTG<br/> CGCACGAGCTTGGTCATCTGTAGGTGCTTCCAACGATGGTTCAAGG<br/> AATCCATGTTCTAGCGATGATGGCTTTGTAATGGCTGAGTATTACAT<br/> CTCGTGACAGAAAACTATGGAAGGTTTTCTAGTTGTACAACGTGACGC<br/> AATTAATAATGCATCTGAAATCTCCTAAGAGCTACTGTCTTCGAAGAA<br/> ACGATGTTTCAGAAATACAGTAATGTGTGAAACAAAAACGCTTTTCCAC<br/> GATATCTGCTATCCAATAAGCTCAGTGGTTTCCAGAATGAAGGGAGG<br/> AGGCAAAATTGATAAGCTA</p>                                                                                                                                                                                                                                                                                                                                                                                                                                                                                                                                                                                                                                                                                                                                                                                                                                                                                                  |



|             |                |        |         |    |                  |                                                                                                                                                                                                                                                                                                           |                                                                                                                                                                                                                                                                                                                                                                                                                                                                                                                                                                                                                                                                                                                                                                                                                                                                                                                                                               |
|-------------|----------------|--------|---------|----|------------------|-----------------------------------------------------------------------------------------------------------------------------------------------------------------------------------------------------------------------------------------------------------------------------------------------------------|---------------------------------------------------------------------------------------------------------------------------------------------------------------------------------------------------------------------------------------------------------------------------------------------------------------------------------------------------------------------------------------------------------------------------------------------------------------------------------------------------------------------------------------------------------------------------------------------------------------------------------------------------------------------------------------------------------------------------------------------------------------------------------------------------------------------------------------------------------------------------------------------------------------------------------------------------------------|
| TatEnzMtp13 | XP_013781814.1 | 1 e-13 | PF01421 | -- | Disintegrin-like | RLYREERGLNMPAFSIQIFVLMSIFALTEVLYSEEITVEV<br>LAVLEKEIADYKFESEKLANLCSIFKEVQGYDNEFEGV<br>KINIVLNGIKTLTGPYFRPSTDFFPHYKYATTMKDERVVQ<br>FSRFMQTQTWSNRYDVILLMLKEVFLGKASLFGGLSYL<br>NGSCHEKRKVGIVIPDPRIIHEIGHLLGAQNDGTNNSCS<br>SEDGYIMQSTATVSVENYHRFSNCSIEEIKRRIRSPAEHC<br>LYTNDIMDSVKCGQMTSCHEHCLPITSVVSSTIDDWKN | CGGTTATACAGAGAAGAAAGAGGATTAAACATGCCTGCATTTTCTAT<br>CCAAATTTTGTGTTTGAGTATGAGCATATTTGCATTAAGTGAAGTCT<br>GTATAGTGAAGAAATAACAGTAGAAGTTCTTGCAAGTTCTGGAGAAG<br>GAAATAGCCGATGAGTATAAAATTTGAGTCCGAGAGAAAAAGCAAATC<br>TTTGCAGTATTTTCAAAGAGGTGCAGGGATATTATGATAATTTTGAA<br>GGAGTTAAAAATAAACATTGTTCTCAATGGAATCAAGACCCTTACGGG<br>CCCGTAATTTCCGTCCATCTACTGATTTTCCGCATTATAAATATGCAAC<br>TACAATGAAAGATGAAAGAGTGGTGCAATTTTCTCGCTTCATGCAAA<br>CACAAACGTGGAGTAACAGATATGATGTCATATTACTTTTAATGAAA<br>GAAAGTTTTTTAGGCAAGGCCTCGTTATTCGGTGGTCTCTCTATCTC<br>AATGGTTCCTGCGAACATAAGCGGAAAGTAGGAATAGTGATCCCTG<br>ATCCGAGAATAATAGCGCACGAAATTGGCCATTTATTAGGTGCTCAG<br>AACGATGGTACCAATAATTCATGTTCAAGCGAAGACGGATATATAAT<br>GCAATCAACAGCTACTGTATCTGTAGAAAATTACCATAGATTTTCCA<br>ATTGTTCAATTGAAGAAATTAAGAGACGTATAAGATCGCCTGAAGCT<br>CATTGTCTCTATACCAATGATATAATGGATAGTGTAAATGTGGACA<br>GATGACATCTTGCCATGAACACTGCCTCCCAATAACCTCTGTGGTTTC<br>CAGCACAAATTGATGACTGGAAAAATTGATTAAGAAAAACATAACATT<br>GAA |
|-------------|----------------|--------|---------|----|------------------|-----------------------------------------------------------------------------------------------------------------------------------------------------------------------------------------------------------------------------------------------------------------------------------------------------------|---------------------------------------------------------------------------------------------------------------------------------------------------------------------------------------------------------------------------------------------------------------------------------------------------------------------------------------------------------------------------------------------------------------------------------------------------------------------------------------------------------------------------------------------------------------------------------------------------------------------------------------------------------------------------------------------------------------------------------------------------------------------------------------------------------------------------------------------------------------------------------------------------------------------------------------------------------------|

|             |                |        |         |    |                  |                                                                                                                                                                                                                                                                              |                                                                                                                                                                                                                                                                                                                                                                                                                                                                                                                                                                                                                                                                                                                                                                                                                            |
|-------------|----------------|--------|---------|----|------------------|------------------------------------------------------------------------------------------------------------------------------------------------------------------------------------------------------------------------------------------------------------------------------|----------------------------------------------------------------------------------------------------------------------------------------------------------------------------------------------------------------------------------------------------------------------------------------------------------------------------------------------------------------------------------------------------------------------------------------------------------------------------------------------------------------------------------------------------------------------------------------------------------------------------------------------------------------------------------------------------------------------------------------------------------------------------------------------------------------------------|
| TatEnzMtp14 | XP_013781814.1 | 6 e-14 | PF01421 | -- | Disintegrin-like | EKQVNLMSNCCLIAMLALSIEIFVFSIFPLIEAQNSKKEEA<br>EVEVLAILEKEYSDEFESDSKRKLDICDIFNEKTEDQPFIE<br>HSSWRNNNVTYLNKTVLAKFSSFLQKEVWNNQYDVIL<br>LLTKKLMAGKNWSLKGAAYRYGSCRHSLKFGIVFPDPR<br>MIAHEIGHLLGADNDGANNTCSSDDGYLMRAYSDIVSY<br>ENHRKFHCSIEAIKQHLESHWSDCLRDTGVKDTVRCG<br>ERTSCNNHCRII | GAAAAGCAAGTTAATTTAATGAGTAACTGCTGCCTTATTGCCATGCT<br>CGCGCTTTCAATTGAGATTTTCGTTTTTAGTATCTTCCCACTTATTGA<br>AGCTCAGAATAGCAAAAAAGAAGAAGCAGAAGTCGAAGTTCTTGCC<br>ATTCTAGAGAAGGAATATTCTGATGAGTTTGAATCTGACTCCAAAAG<br>AAAATTAGATATTTGTGATATTTTAATGAGAAAAACGGAGGACCAGC<br>CTTTCATTGAACACTCGTCTTGGCGAAATAACAACGTAACCTACCTA<br>AACAAAACCGTTCTGGCCAAATTTTCAAGTTTCTTGCAAAAAAGAAGT<br>ATGGAATAATCAGTATGATGTCATACTGCTTTAACAAGAAATTTGA<br>TGGCAGGCAAAAATTGGAGTCTAAAAGGTGCAGCTTACCGATATGG<br>ATCCTGCAGGCATTCGCTAAAATTCGGAATAGTTTTCTCTGATCCAA<br>GGATGATAGCACACGAAATTGGCCATCTGTTAGGTGCTGACAATGAT<br>GGCGCAAATAATACATGTTCCAGCGACGATGGCTATTTAATGAGAGC<br>ATATTCGGATATTGTATCTTATGAAAACCATAGGAAATTTTCTCATTG<br>TTCAATTGAAGCTATTAACACGATCTGGAGTCACATTGGAGCGACT<br>GTCTTCGAGATACCGGCGTTAAAGACACAGTAAGATGTGGAGAGAG<br>AACGCTCTGCAACAACCACTGCCGAATAATA |
|-------------|----------------|--------|---------|----|------------------|------------------------------------------------------------------------------------------------------------------------------------------------------------------------------------------------------------------------------------------------------------------------------|----------------------------------------------------------------------------------------------------------------------------------------------------------------------------------------------------------------------------------------------------------------------------------------------------------------------------------------------------------------------------------------------------------------------------------------------------------------------------------------------------------------------------------------------------------------------------------------------------------------------------------------------------------------------------------------------------------------------------------------------------------------------------------------------------------------------------|

| CAP-Superfamily |                      |         |             |         |                    |                     |                     |
|-----------------|----------------------|---------|-------------|---------|--------------------|---------------------|---------------------|
| ID              | ID/Reference protein | e-value | PFAM domain | MW (Da) | Sub-classification | Amino acid sequence | Nucleotide sequence |

TatOthCRI01

JAV48224.1

0

PF00188

--

CRISP

MIKKITRFTVSFVPQIWIIVLLILSSSSSHGETICEAKYRNI  
HPEHSMCKARNNTCKFRQGLEENAKELVDFHNRIRKSI  
RQIIGNNFSEGKSMKNMQWDHELILIAQKHVLQCTGLP  
DCYQCHQTDRLFYVEQNFAVKTFNSVKESFNGTIERFKA  
VIKEWAEELSEYGPEVNVNKFHFTGLPTNWTNIFRATTNK  
VGCASIAYDTQKEGTFTEVYVCNYGPAILTENEVIYEPV  
YTNCNNGLCKNQFLEKYGNSNFYRSNRPPERGKRSGAQ  
LQHNNGRLSRNSEEECPAKYRNITVDHSYCKPDVEGC  
VFSRKYVRYRKKLLDTHNEIRNSVEAYAGWAYGTATN  
MRVMEWDDELYDIAKRYVIQCLVEPDCHLCHQAADFP  
VEQNFAVKVISYNGPQSQERFGAVIKGWAMELKNFAQS  
DVEHLSKEIIQRDDKNWINVFRASAWKVGCAISFETSP  
KPD LIVKEVYICNYGPAELSEGEEVYQIGESCSNCDPGFD  
CDEKYPNLCSKKEKPESNDDWLQTMAAKTTAETAS  
KNSIRTESDIFADEVDGSTVGSVKTSVNITPTMTAITTP  
SAPTTTTITVSPVPTVSLSTENPHATEMPVETSTVSAVTS  
KQIVLYNNKTKTSKGNIVWNCTLRFFDDEECRREQQCF  
QAWTMSNDGKQPFMEIDIPENRRTALLFLHQIYIEKPSCF  
TFTYMKDGLSRLSSLDSTLYGIVVRTESNEHVMVDVNG  
NVPVWNSLAVDIPWEKVVFVQVGVAVKTYDGRGEQHIQ  
IKDLLIHVGPCTAL

ACACAATGTAGAATAGGATCAGTAAATCCAAAGTTAACAGGAGATA  
ATCTTATAATGATTAAGAAAATAACTCGATTCACTGTCAGTTTTGTTC  
CACAAATTTGGATTATCGTTTTGTCTATTCTGAGTTCAGCTCAAGTC  
ATGGGGAAACTATTTGTGAAGCCAAATATCGAAATATACATCCGGAA  
CATTCGATGTGCAAGGCTAGGAATAATACTGCAAATTAGGCAAGG  
ATTGGAGGAAAACGCTAAGGAACCTTGTGGACTTTCATAACCGAATCC  
GAAAGTCGATACGACAGATTATTGGAAACAACCTTTCCGAAGGGAA  
AAGTATGAAAAATATGCAATGGGATCAGAGCTCTATCTCATAGCTC  
AAAAACACGTGCTTCAATGCACAGGATTACCCGATTGCTACCAAGTGT  
CATCAAACAGATAGATTTTACGTGGAACAAAATTTGCGGTCAAAAC  
CTTCAATTCTGTTAAAGAAAGCTTCAACGGAACCAATTGAACGGTTTA  
AAGCAGTTATAAAAAGAAATGGGCTGAAGAACTAAGCGAGTATGGTCC  
AGAGGTAGTTAAACAAGTTCATTTCACGTGGGCTTCTACTAATTGGGA  
CAAATATATTTTCGCGCGACAACATAAAAGTGGGGTGTGCGTCGATA  
GCTTATGACACGCAGAAAGAGGGCACTTTTACAGAGGTTTACGTATG  
TAATTACGGTCTCTGCAATCTTACAGAGAACGAGTTATTACGAAC  
CAGTATATACAAATTGCAACAATGGTTTATGTAAAAATCAGTTCCTTG  
GAGAAATATGGAAACAGCAACTTCTATCGTTCCAATAGACCGCCCGA  
GAGAGGAAAACGTAGCGGTGCACAGTTGCAACATAAATATGGACGT  
CTATCTCGAAATTCAAGAAGGAAGAGTGCCAGCTAAGTATCGAA  
ATATTACAGTAGATCATTCTATTGCAAAACAGATGTTGAAGGATGC  
GTATTTAGCAGAAAAATATGTCAGATACAGAAAGAAACTCTTAGATAC  
TCATAACGAAATTCGTAATTCAGTTGAAAGCTTATGCAGGTTGGGCTT  
ATGGTACTGCAACGAACATGCGAGTAATGGAATGGGATGATGAACT  
GTATGATATTGCTAAACGCTATGTCATTCAATGTCTTGTGGAACCA  
ACTGTCTATTATGCCACCAAGCAGCTGACTTCCCTGTGGAGCAGAAC  
TTTGCTGTTAAAGTTATAAGCTATAATGGACCCCAATCACAAGAAAG  
ATTTGGAGCAGTAATTAAGGGATGGGCTATGGAATTAAGAATTTTG  
CACAGAGTGATGTGGAGCATCTCTCCAAGGAAATTATACAAAGAGA  
TGATAAAAACTGGATAAATGTATTTTCGAGCGAGTGCATGGAAGGTA  
GGATGTGCATCAATATCATTGAAACGTCACCAAAACAGATCTTAT  
TGTGAAGGAAGTGATATATGCAATTATGGCCAGTGGAATTATCTG  
AAGGTGAAGAAGTATATCAAATTGGAGAGTCTTGTAGCAACTGCGA  
CCCAGGGTTTGATTGTGATGAAAAATACCTAATTTATGTAGCAAAA  
AAGAGAAAACCTGAATCCAACGATGATTGGCTAACTCAAACGATGGC  
AGCAAAGACAACCTGCAGAAACTACAGCTAGCAAAAATTCTATTAGG  
ACTGAAAGTGATATCTTTGCAGACGAGGTTGATGGATCTACTGTGG  
TTCAGTGAAAGCAAGTGTAATATAACCACTCCCACCATGCAAACTG  
CAATTACAACCCCTTCAGCTCCAACCACCACAACAATTACAGTTTCA  
CCAGTGCCAACCTGTATCCCTTAGCACAGAGAACCCACACGCAACTGA  
AATGCCTGTTGAGACTAGCACAGTATCTGCTGTCACAAGTAAGCAAA  
TTGTGTTATATAATAATAAAACAAAACTTCTAAAGGCAACATAGTG  
TGGAACCTGCACCTTGCGGTTTTTCGATGATGAGGAATGTAGACGTGA  
GCAACAGTGTTTTCAAGCATGGACTATGTCAAATGATGGAAGAACAGC  
CGTTTATGGAATTGATATTCAGAAAACCGGAGAACAGCCTTATTG  
TTTCTTCATCAAATTTATATTGAAAAACCTTCTTGTTTTACTTTTACCT  
ATATGAAAGATGGGCTCAGCAGATTGTCTTCTTCTTGACGCACTCTTT  
ACGGTATTGTTGTTAGGACAGAAAGCAACGAACATGTAATGGTGGAT  
GTGAACGGTAATGTTCTGCTGGAATTCTCTAGCTGTGGATATTCTCT  
TGGGAGAAAGTTTTGTCCAGGTGGGAGTTGCTGTTAAACATATGA  
TGGAAGGGGTGAGCAGCACATTCAAATAAAGGATTACTAATCCATG  
TTGGACCATGTACTGCATTG

|             |                |         |                     |    |       |                                                                                                                                                                                                                                                                                                                                                                                                                                                                                                                                                                                                                                                                                                                                                                                                                                                                                                                                                                                                                                                                                                                                                                                                                                                                                                                                                                                                                                                                                                                                                                                                                                                                                                                                                                                          |
|-------------|----------------|---------|---------------------|----|-------|------------------------------------------------------------------------------------------------------------------------------------------------------------------------------------------------------------------------------------------------------------------------------------------------------------------------------------------------------------------------------------------------------------------------------------------------------------------------------------------------------------------------------------------------------------------------------------------------------------------------------------------------------------------------------------------------------------------------------------------------------------------------------------------------------------------------------------------------------------------------------------------------------------------------------------------------------------------------------------------------------------------------------------------------------------------------------------------------------------------------------------------------------------------------------------------------------------------------------------------------------------------------------------------------------------------------------------------------------------------------------------------------------------------------------------------------------------------------------------------------------------------------------------------------------------------------------------------------------------------------------------------------------------------------------------------------------------------------------------------------------------------------------------------|
| TatOthCRI02 | XP_013781883.1 | 1 e-119 | PF00188,<br>PF08562 | -- | CRISP | <p>MAILGKNLFIKPQLFNSAIVEICLILLVSAYPRLQRPKLYG<br/>DAIPLRDLDPHFKTRRKIVLLHNSYRARVDPPASNMLA<br/>MSWHEEAAKDAQRWAEACELLVHDSPTGRWVNNYGS<br/>CGQNIFVANMKVSWSFALKAWNVERYDFEYGSNKNIPS<br/>VVGHYTQMVWYKSHKVGCGFHYCGENRVKKPFYNYV<br/>CNYCPIGNDPATFNPEPYGIGKPCSKCPGKCKYKKLCTNG<br/>CRYGDSWSNCAELNATWSNWLCSDPKQQRHSCMG<br/>T</p> <p>ATGGCCATCTTAGGAAAGAATTTATTTATCAAACCACAACTTTTAAT<br/>TCTGCGATTGTAGAAATATGTTTGATTCTACTGGTCTCTGCCTACCCT<br/>CGGCTCCAACGTCCTAAACTATACGGCGATGCCATACCGCTTCGTGA<br/>TTAGATCCTACTCATTTCAAAACTCGAAGAAAGATTGTTCTCTGCA<br/>CAATTCCTATCGCGCAAGAGTGGATCCTCCAGCAAGTAATATGTTAG<br/>CAATGTCTATGGCATGAGGAAGCAGCAAAAAGACGCTCAGCGGTGGGC<br/>GGAAGCTTGTGAATTACTTGTTCATGACAGCCCAACTGGTCGTTGGG<br/>TGAATAATTATGGATCCTGTGGGCAAAATATTTTCGTAGCAAAATATG<br/>AAAAGTGAGTTGGTCTTTTCGCTCTAAAAGCTTGGAATGTGGAAGATA<br/>TGATTTTCGAATACGGCAGCAATAAAAACATCCCATCTGTGGTGGGAC<br/>ACTACACTCAGATGGTATGGTATAAATCTCACAAGGTAGGATGTGGA<br/>TTCCATTACTGTGGAGAAAAATAGGGTGAAAAAGCCTTTTACAATTA<br/>CGTATGCAATTACTGTCCAATAGGTAATGATCCTGCTACATTTAATG<br/>AACCATACGGAATTGAAAACTTGTTCAAAATGTCCAGGAAAAATGC<br/>AAATATAAAAAACTATGCACTAATGGGTGTAGATATGGCGATTCTTG<br/>GAGTAACCTGTGCAGAACTAAATGCAACTTGGAGCAACTGGTTATGCA<br/>GTGACCCTAAACAACAACGCTATCTTCTGCATGGGTACTTGTGCTG<br/>TGTGGATCTGAATTCATCAATGAATTATAAAGCACTTCAAAACAACG<br/>AGAACGCGAC</p>                                                                                                                                                                                                                                                                                                                                                                                                                                                                          |
| TatOthCRI03 | XP_015929114.1 | 3 e-66  | PF00188             | -- | CRISP | <p>MLFLLAFLVPLFLKDWCYGKESPVGITAWKSEFDNMES<br/>NYVTLDYAVSNKSRRGATNMGVPIPLSDEEKVEIVSTH<br/>NKYRSQVFPPAANMRYMKWNDEVADSAQTWANKCVF<br/>KHGRPSVSKFKGAMGQNIYKGSNAPLSFYMSLWYDEV<br/>HDFDMRLKQCNGSKCGHYIQIAWAEFLIGCGHTKCEG<br/>KRGPFNIFVCHYHKPEKEDPYIIGRPCSMCNVETGGFC<br/>YNNMCVSKEDCERESWPCECNLKCHNCGVLNKSTCSC<br/>ECPGWDFQDCSQQCIDEDSWCGKEGGYQGWVGCAM<br/>LEDNGFCRKMCGICEDITKDNEHMTCEGKRCETGYVL<br/>NLVNNNCSCQLLCPGPECFTIPDSGHALQGRYYVLLTV<br/>MISM CIVLYSCM</p> <p>ATGCTGTTCTTTTAGCATTCTGGTGCCATTGTTTTTAAAGACTGG<br/>TGTATGGGAAAGAAAGTCCAGTTGGTATTACTGCGTGGAAAGTG<br/>ATTTGATAATATGGAATCTAATTATGTGACATTAGATTACGCAGTAT<br/>CTAATAAGTCGAGAAGAGGGGCCACTAATATGGGAGTACCTATACC<br/>ACTTAGTGATGAAGAGAAGGTAGAAATAGTCAGCACCCACAACAAG<br/>TACAGAAGTCAAGTGTTCCACCAGCTGCCAATATGAGATACATGAA<br/>ATGGAATGACGAAGTAGCCGACTCAGCTCAAACCTGGGCGAACAAA<br/>TGCGTTTTCAAACATGGCCGTCCCTCAGTGTGCAAGTTTAAAGGAGC<br/>GATGGGTCAAAACATATACAAAGGAAGTAATGCGCCTTTGTCTATTCT<br/>ACATGTCACTCTGGTATGATGAAGTACACGATTTTGATATGAGGCTA<br/>AAACAATGTAATGGTAGCAAAATGCGGGCATTATATTCAGATTGCATG<br/>GGCTGAATCTTTTTTAATAGGCTGTGGTCACACTAAATGCGAAGGAA<br/>AACGGGGTCCTTTTAAACATTTTGTATGCCATTACCATAAACCTTTTG<br/>AAAAGGAGGATCCATATATCATTGGTAGGCCATGTTCTATGTGCAAT<br/>GTAGAAAACAGGAGGATTTTGTACAATAATATGTGTGTCTCTAAAGA<br/>GGATTGCGAAAGAGAGAGTTGGCCTTGTGAGTGAATTTGAAAGTGTC<br/>ACAACCTGTGGTGTGCTTAAACAAATCAACGTGTTCTGCGAATGTCCA<br/>CCAGGGTGGGATTTTCAAGATTGTTGCAACAATGTATAGACGAAGA<br/>TAGTTGGTGCAGAAAGGAAGGTGGTTACCAAGGTGGGTGGTTGTG<br/>CAATGTTGGAAGATAACGGGTTTGTAGAAAAGATGTGTGGAATTTGC<br/>GAAGACATCACAAAAGACAATGAACATATGACATGCTGCGAAGGTA<br/>AAAGATGCGAAACTGGATATGTCCTAAATCTCGTTAATAATAACTGC<br/>AGTTGTGAGCTGTTATGTCCGGGACCAGAATGCTTTACAATACCGGA<br/>CAGCGGCATGCACTGCAAGGAAGATATTATGTGTACTTACTGTAA<br/>TGATATCAATGTGTATAGTTTGTATAGCTGTATG</p> |

|             |            |        |         |    |       |                                                                                                                                                                                                                                                                                                                                                                                                                                                                                                                                                                                                                                                                                                                                                                                                                                                                                                                                                                                                                                                                                                                                                                                                                                                                                                                                                                                                                                                                                                                                                                                                                                                                                                                                                                                                                                                                                                                                            |
|-------------|------------|--------|---------|----|-------|--------------------------------------------------------------------------------------------------------------------------------------------------------------------------------------------------------------------------------------------------------------------------------------------------------------------------------------------------------------------------------------------------------------------------------------------------------------------------------------------------------------------------------------------------------------------------------------------------------------------------------------------------------------------------------------------------------------------------------------------------------------------------------------------------------------------------------------------------------------------------------------------------------------------------------------------------------------------------------------------------------------------------------------------------------------------------------------------------------------------------------------------------------------------------------------------------------------------------------------------------------------------------------------------------------------------------------------------------------------------------------------------------------------------------------------------------------------------------------------------------------------------------------------------------------------------------------------------------------------------------------------------------------------------------------------------------------------------------------------------------------------------------------------------------------------------------------------------------------------------------------------------------------------------------------------------|
| TatOthCRI04 | JAV45657.1 | 3 e-16 | PF00188 | -- | CRISP | <p>MQATMKLMLGITSLLFAVPSILCLTCSQSSYGNYDETSLESTRDEITIPIDWWKILKINPGFAERKSIIVQKECPEIYQRF SVNHTFCKEAAEGITEGVTDKDNVILDHNTLRSKLAS GEEARYRQLPSAANMMQMEWDDLAAVAQAHSNLCK FEHDESDQRAVENFRVGNL LLLSTSPNKNWNSSQRWY KEEVCFFFPEYINPFQFQSDFGHFSQVTWATTWKVGC GF TAYQEGSGTRTLTYTCNYGPGGNVDGGVQYIVGEPSCQ PDNTECSTQYPGLCKSLTENGPQIPRPAADEYILCFDFSE EDPEECININVEGSKNFSTGHIYSGNYKTVILEEGEHITID FGEAQNDGGFCPFLYSRFGPNNAKESNGAVMEFLFRSP NTVPQPPTKMPPRGNFSTFGIYMMYNGKLKTTVTLRA EEGAAPQYFDIKYWGIRRGNCKTNF</p> <p>ATGCAAGCCACCATGAAGTTGATGTTGGGAATAACTTCACTGCTTTT CGCAGTTCCCTCCATTTTGTGCCTTACATGCTCTCAGAGTT CATATG G AAATTACGATGAAACCTCCCTAG AATCCACAAGAGATGAGACGATTC CCATTGATTGGTGGAAAAATACTAAAAATCAACCCTGGGTTTGTCTGAA AGAAAAATCAATTATAGTTCAGAAAGAATGTCCAGAAATCTACCAAC GTTTCAGTGTTAATCACACTTTCTGTAAAGGAAGCAGCAGAAGGTATT ATAACAGAAGGAGTGACTGACGGAAGACAAGAATGTTATTTGGACA TACATAATACATTAAGAAGCAAGCTGGCTAGTGGAGAAGAAGCAGC TTATCGTCAATTGCCTTCTGCAGCAAACTGATGCAATGGAATTGGG ATGATGAATTAGCAGCTGTAGCTCAAGCCCATTCGAACCTTTGCAAG TTTGAACATGACGAGAGTGATCAGAGAGCTGTAGAAAACTTCCGGGT TGGACAAAATTTGTTGCTATCAACTTCTCCAAACAAGAAGCTGGAATT CTCTCAGAGGTGGTATAAAGAAGAAGTGTGCTTTTCTTCTCGTAAT ATATTAAACCCATTTCAATTCCAAGCGATTTTGGACATTTCTCTCAGG TAACATGGGCAACAACATGGAAGGTAGGATGTGGAATTTACAGCTTAC CAAGAGGGTAGTGAACGAGGACACTCTATACATGCAATTATGGAC CTGGGGGTAAATGTTGATGGAGGTGTACAATACATTTGATGAGGAGCCT TGTTCCTCAATGTCTGACAACACAGAGTGTTCGACTCAGTATCCAGG ACTTTGTAATCTCTAACCGAAAATGGACCACAGATACCAAGACCAG CAGCAGATGAATACATACTGTTCTGCGATTTTAGTGAGGAAGACCCA GAAGAATGTATTAAACATTAATGTTGAAGGTTCAAAGAACTTCTCAAC AGGACACATATATTCTGGTAATTACAAAACAGTCATTCTTGAAGAAG GCGAGCATATAACCATTGATTTTCGGGGAAGCACAGAATGATGGGGG TTTCTGCCCATTTCTCTACAGTCGTTTTGGTCTTCAACAATGTCAAA GAAGCAATGGAGCTGTAATGGAATTCCTTTTCAGAAGTCCAAACACTG TACCACAGCCTCCAACAAAATGCCTCCACGTGGTCCTAACTTTTCC ACATTTGGTATATATATGATGTACAATGGCAAGCTTAAGACGACTGT AACACTTAGAGCAGAAGAGGGCGCTGCACCGCAATATTTTGACATTA AGTACTGGGGTATTTCGAGGGGAAATTGCAAAACTAATTCT</p> |
| TatOthCRI05 | JAV45657.1 | 4 e-83 | PF00188 | -- | CRISP | <p>MVKLMNLHHYYSIMVFLIFISFLCGVSCSNKLPEDEDE QRYIFINKKKSCIIGQENDCNSNMFRDIFLHHQNTERTKI GAKLNMNLAASNMLQMEWDQTLADGAWKYVETCF L DYPTYVGIEVCREASIVTTFDGGVNYRKYKEDYPHV VDRILNAIANWTNYINDYDKSKLKVLHLYQESGAAEDS WSQVVRATTWKFGCALADGR TENTRLDEFVEVIACFY GNTKLQKGDEIFKPGKPCSSCPLGTHCNEYLC E VEPGQC PVPGNDFALEGQHCHKIDIVEIQEDSEESGEILWECNLQK YGEQCEILPSCSPFWNIDLIGNFKTITVKGNCV SANVFLE EISVVVPSCFRFQYIKERNPTRRFHTVMVMGFAFNLSGE SINIMKNEDANSWADVNLDIPWNTNTVQVGLVRSYS DN IFQQHVTVGNFVSFVEGNCS</p> <p>ATGGTTAAGTTGATGAATCTTCATCATTATTATTCAATTATGGTGTC CTATCTTTATAAGTTTCTTATTGTGCGGAGTTTCATGTTCCAATAAA CTGCCAGAGGATGAGGATGAACAAAGATACATATTTATCAACAAAA AAAAGTCATGCATCATTGGTCAAGAAAATGATTGTAATTCAACATG TTTCGAGACATATTTTACATCATCAGAACACTGAGCGTAAAACAAT TGGTGCTAAACTAAATATGAATTTAGCTGCATCAAAATATGTTACAGA TGGAATGGGATCAGACACTTGCAGACGGTGCATGGAAAATATGTTGA AACATGCTTTTTAGACTACCCAACCTACGTCGGGATTGAAGTTTGTA GAGAAGCAAGCATAGTAACTACTTTTGATGGTGGTGTTAATTACTAC CGGAAAACCTTACAAAGAAGATTATCCACATGTTGTAGATCGTATCCT TAATGCAATTGCTAATTGGACTAACTACATCAATGATTATGATAAAA GCAAACTGAAAGTACTTCATCTCTATCAGGAAAGTGGCGTGCTGAG GATTTCGTGGTCCCAGGTAGTTCGAGCAACCACATGGAAATTCGGATG TGCAC TTGCTGATGGTTCG TACTGAAAACACTAGATTAGACGAATTCG TAGAAGTTATAGCTTGCTTTTATGGAAACACAAAGTTGCAAAAAAGGT GATGAGATATTTAAACCAGGAAAAACCTGTTCGTCTGTCTCTTTGG AACACATTGCAACGAATATTTATGCGAAGTAGAGCCAGGCCAGTGTC CTGTACCAGGCAATGATTTTGCAC TTGAAAGGACAACATTGTCACAAA ATAGACATAGTTGAGATTCAAGAAGATTCAGAAGAGAGTGGAGAAA TTCTTTGGGAATGCAACTTGCAGAAAATATGGAGAACAATGTGAAATC TTACCTTCATGCTCACCATTCTGGAACATTGATCTAATTGGGAATTTT CAAAATATTACAGTTAAAGGTAAC TGTGTATCAGCCAATGTATTTT AGAAGAGATCAGCGTCGTAGTTCCATCTTGCTTTAGATTTCAATACA TTAAGAAAGGAATCCAACGCGACGATTCATACTATGGTAATGGGA TTCGCCTTTAATTTAAACTCTGGAGAAAGCATTAAATATAATGAAGAA TGAAGATGCAAAATAGTTGGGCTGATGTCAATTTGGATATCCCATGGA CGAATACTGTAATACAGGTTGGAATACTTGTCCGTTCTGACTCCGAT AACATTTCCAGCAGCATGTAAC TGTAGGGAATTTACGCTTTTCGA AGGAAATTTGTTCC</p>                                 |

|             |            |         |         |    |       |                                                                                                                                                                                                                                                                                                                                                                                                                                                                                                                                                                                                                                                                                                                                                                                                                                                                                                                                                                                                                                                                                                                                                                                                                                                                                                                                                                                                                                                                                                                                                                                                                                                                                                                                                                                                                                                                                                   |
|-------------|------------|---------|---------|----|-------|---------------------------------------------------------------------------------------------------------------------------------------------------------------------------------------------------------------------------------------------------------------------------------------------------------------------------------------------------------------------------------------------------------------------------------------------------------------------------------------------------------------------------------------------------------------------------------------------------------------------------------------------------------------------------------------------------------------------------------------------------------------------------------------------------------------------------------------------------------------------------------------------------------------------------------------------------------------------------------------------------------------------------------------------------------------------------------------------------------------------------------------------------------------------------------------------------------------------------------------------------------------------------------------------------------------------------------------------------------------------------------------------------------------------------------------------------------------------------------------------------------------------------------------------------------------------------------------------------------------------------------------------------------------------------------------------------------------------------------------------------------------------------------------------------------------------------------------------------------------------------------------------------|
| TatOthCRI06 | JAV48225.1 | 5 e-145 | PF00188 | -- | CRISP | <p>MASVIITILVLWVTTIQSFEANDECDEYSSITQEHTMCK<br/> SINENCHFLRHGGKTYEQQLLRTHNLIRNSIWKYVGKN<br/> YPLATNMEIMQWDDLEYEIARMHSLQCVEQPDCLCH<br/> QIGYFPVEQNFVAKTYKKSEVANNGPVKRFQTVIKEWA<br/> AELKQYDPSIVNDFTVTEELPTNWTNLRANTSFVGCAS<br/> MNFYTDETDVFTEVYVCNYGPAKLTTGEEIYKTGGKPC<br/> SDCEDDGICDEEFKNLCVPADLELNITIVIPEEEDTEIWL<br/> EGNYNGTSLSEEIEGTTSPNEFTTAESAFTLYRQTGTPE<br/> ETHTAIGEENSSVVFTEAPEETSIVFTELSNEPVTTEV<br/> EESGERRRKRKVHPLISRLRLRYSNKRRKRHQBHSLFPMN</p> <p>ATGGCGTCAGTGATTATTACCATTTTAGTTCTATGGGTGACAACGATT<br/> CAAAGCTTTGAAGCCAATGATGAATGTGACGAAAGGTACAGCAGCA<br/> TTACTCAGGAACACACCATGTGCAAAAAGTATAAATGAAAACCTGCCAT<br/> TTTCTTAGGCACGGTGGTAAAACATATGAGCAGCAACTACTTCGCAC<br/> TCATAACTTGATACGAAAATTCATTTGGAAGTATGTTGGAAAAAACT<br/> ACCCCTTTGGCAACTAATATGGAAAATAATGCAATGGGATGATGAACTG<br/> TATGAAAATAGCCAGGATGCATAGTCTCAATGTGTTGAGCAACCTGA<br/> CTGTGATCTATGCCACCAGATCGGTTACTTTCCTGTGGAGCAAAATTT<br/> CGCCGTTAAAAACGTATAAAAAAGTCAGAGGTTGCTAACAATGGTCCCG<br/> TCAAAACGATTCCAAACTGTCATTAAAGAGTGGGCAGCCGAACTGAA<br/> ACAGTATGACCCTAGTATCGTTAATGATTTTACAGTTACCGAAGAAC<br/> TTCCCACTAATTGGACTAATACTCGCGTGCTAATACATCGTTCGTTG<br/> GATGCGCGTCCATGAATTTCTATACTGATGAAACAGACGTCTTCACA<br/> GAGGTATATGTGTGCAATTACGGACCTGCGAAACCTTACTACAGGAGA<br/> AGAGATATATAAAACAGGTGGTAAACCTTGCAGCGATTGCGAAGAC<br/> GATGGAATATGCGATGAGGAGTTTTAAAAACCTATGTGTTCCAGCTGA<br/> TTTAGAGCTAAATATCACAAATAGTTATTCCTGAAGAGAAGAAGACACGG<br/> AAATTTGGCTAGGTGAGGGAAATTACAATGGAACCAAGTCTAAGTGA<br/> AGAAATCGAGGGAACCACTGTCACCTAACGAATTCACACGCGAGAA<br/> TCAGCAAAAACGTTTCCTTTATAGACAAACTGGAACCTCTGAAGAAAC<br/> ACATACTGCAATAGGCGAGGAAAAATCTTCTGTGGTATTACAGAAAA<br/> CAGCTCCAGAGGAAACTTCAATTGTTGAGTTTACAACAGAACTTTCT<br/> AACGAACCTGTCACTACAGAAAGTCGAAGAAAGTGAGAGAGGCGTA<br/> AAAGGAAAGTTTATCCCTTGATATCAAGATTGCTTAGATATAGTAAC<br/> AAACGCAGAAAAGAGACATCAAGAACATAGCCTATTTCTATGAAT</p>                                              |
| TatOthCRI07 | API81352.1 | 0       | PF00188 | -- | CRISP | <p>MNLLLLSCLVLFSCQAVFAQTCPALYLRFSDKHTYCRHS<br/> TCQTEKSGVSEKDKIIVNMHNEFRSKIAMGKETTPMQ<br/> QPPAANMMQISWDEELAAVAQAHANGCKFDHDTAPQR<br/> QVENFNVGQNLITMMSKRIDWRKAALWYTSEVKDFY<br/> PQYREPFVFGTYGHFSQVVAETWKVVGCGMAMYYDQ<br/> SDNMDKVLTYTCNYGPAGNMQGAAMYIKGQPCSQCPK<br/> NTKCSDEYEGCLKPITKDGPNQNDIAKSSNDFIFYCEFSKN<br/> DPSECSKVKVEGTFKGFETRKIYSGIYKSVILNGGESITIKL<br/> GKAQDAGGICPFYGSFGPNKDGDAKMSAVSFGFSAPGI<br/> IFGDPKIEQGGSAFWTIGMHMQFDQEMESTIKLEAYPG<br/> ATPQYFNVKAFGIGKGKCPKL</p> <p>ATGAATTTCTACTGCTGCTGTCTGTCTTGTCTTTTCTTGCCAAGCTG<br/> TTTTTGCTCAAACCTGCCTGCGTTGTACCTAAGATTCAAGTAAGGATC<br/> ACACATACTGTCGACATTCAACATGCCAACTGAGAAAAGTGGTGT<br/> TCTGAAAAGGACAAGGAAATAATTGTAACATGCATAACGAATTCA<br/> GAAGTAAATCGCTATGGGAAAGGAAACCACCCCATGCAGCAACC<br/> CCCTGCAGCTAATATGATGCAAAATATCATGGGATGAAGAGCTGGCTG<br/> CAGTTGCGCAAGCCCACGCTAATGGATGTAAATTTGACCACGACACT<br/> GCACCTCAACGACAAGTAGAAAACTTCAATGTTGGGCAAAATCTGTA<br/> TATAACCATGATGTCAAAGAGGATAGATTGGAGGAAAGCTGCTTTGT<br/> GGTACACTTCTGAAGTGAAAGATTTCTATCCACAATATAGAGAACCA<br/> TTTGATTTTGGCACATATGGGCATTTCACTGAGGTAGTCTGGGCTGA<br/> AACATGGAAAAGTGGGTTGTGGAATGGCTATGATTATGACCAAAGCG<br/> ATAATATGGATAAAAGTGCTATACACCTGTAATTATGGACCTGCAGGA<br/> AATATGCAAGGGGCTGCAATGTATATTAAGGGCAACCATGTCTCTCA<br/> GTGTCCAAAGAATACAAAATGCTCAGATGAATATGAAGGACTTTGCA<br/> AACCAATAACCAAAGATGGCCCCCAAAATGATATTGCCAAATCTTCA<br/> AATGATTTTCTCTTTTACTGTGAGTTTAGTAAGAATGACCCAAGTGA<br/> GTGCAGTAAAGTCAAAGTTGAAGGAACAAAAGGATTGAAACAAGG<br/> AAAATATACAGTGGCATATACAAGAGTGTTATTCTTAATGGAGGAGA<br/> ATCCATTACCATAAAATTAGGAAAAGCTCAAGACGCTGGAGGAATA<br/> TGCCCTTTTATTATGGATCTTTTGGCCCCAACAAAGATGGTGATGCT<br/> AAAATGTCTGCGGTATCTTTGGCTTTTCTGCACCTGGAATCATATTT<br/> GGAGATCTTATTAATAAGAGCAAGGTGGTAGTGCTTTCTGGACAAT<br/> AGGAATGCATATGCAGTTTGTACAGGAAATGGAGAGCACTAATAAG<br/> CTAGAAGCATATCCTGGAGCAACTCTCAATATTTCAATGTAAAAGC<br/> ATTTGGAATTGGGAAAGGAAAATGCCCAAACTT</p> |

|             |                |        |         |    |       |                                                                                                                                                                                                                                                                                                                                                                                                 |                                                                                                                                                                                                                                                                                                                                                                                                                                                                                                                                                                                                                                                                                                                                                                                                                                                                                                                                                                                                                                                                                                                                                           |
|-------------|----------------|--------|---------|----|-------|-------------------------------------------------------------------------------------------------------------------------------------------------------------------------------------------------------------------------------------------------------------------------------------------------------------------------------------------------------------------------------------------------|-----------------------------------------------------------------------------------------------------------------------------------------------------------------------------------------------------------------------------------------------------------------------------------------------------------------------------------------------------------------------------------------------------------------------------------------------------------------------------------------------------------------------------------------------------------------------------------------------------------------------------------------------------------------------------------------------------------------------------------------------------------------------------------------------------------------------------------------------------------------------------------------------------------------------------------------------------------------------------------------------------------------------------------------------------------------------------------------------------------------------------------------------------------|
| TatOthCRI08 | XP_015929114.1 | 4 e-83 | PF00188 | -- | CRISP | GLVSKVAVERPMNIMVKETVIKLSEEERFYIAQIHNLFRS<br>NATPPAANMRYVQWDETLEKTAQAWASLCVMRHGTP<br>ASPRYHDSYGQNLYYGPSSSTHRAMWLWYNELHDYDH<br>RNAKCALGRECGHYIQMMWWKTKLIGCSLAQCGKSEF<br>FFVCHYYPPQFFNNTAPYTVGEPCLCNIGHGGLCNNSLC<br>VTKTACEKYGLECECHLKCHNCGRFNNSTCSCDCVDG<br>WDFLDCSTQCKDESEHCCKDDGYPSMLNCPMYKGQVK<br>NEHCRKMCQACESVNSSYLRRRTCCDGIVCSPGYVIDLE<br>NRPCSCRLLCPGPECYSSFSGKIWQVDLFLFEIGICAVLCM<br>IWSR | GGTTTAGTTTCGAAGGTTGCGGTAGAAAGACCAATGAATATAATGGT<br>TAAGGAGACCGTTATTAAACTTAGTGAAAGAAGAGAGATTTTATATTG<br>CCCAAATCCATAACTTGTTTCGAAGCAACGCCACACCACGACAGT<br>AATATGAGATAACGTGCAGTGGGATGAAACATTAGAGAAAACGGCAC<br>AAGCTTGGGCAAGCTTGTTGTGTGATGCGCCATGGCACTCCAGCATCT<br>CCTAGGTACCACGATTCTATGGGCAGAATTTATATTGGACCCAG<br>TAGCTCCACTCACAGGGCAATGTGGTTGTGGTATAACGAATTACATG<br>ATTATGATCATCGCAATGCTAAATGTGCTCTAGGAAGAGAATGCGGG<br>CACTATATTAGATGATGTGGTGGGAAGACAAAATTGATTGGTTGTTT<br>ATTGGCCCAATGCGGAAAATCTGAATTTCTTTTCGTATGTCATTACTA<br>TCCTCAGTTCTTTAATAACACAGCACCTTACACAGTTGGGGAACCTT<br>GCTCCCTTTGCAATATTGGTCACGGAGGATTATGTAATAACAGTTTGT<br>GTGTAACGAAGACAGCGTGTGAGAAATATGGTTTAGAATGTGAATG<br>CCATTTGAAATGTCATAATTGTGGTCGATTTAATAATTCAACGTGCA<br>GCTGTGACTGTGTGGATGGATGGGACTTTCTAGACTTTCACACAA<br>TGCAAGGATGAGAGTGAACACTGTGGAAGATGATGGCTATCCAA<br>GTATGTTAAATTTGCCAATGTACAAAGGTCAAGTCAAGAATGAACAT<br>TGCAGAAAGATGTGCCAAGCATGTGAAAGTGTAAATTCAAGTTATCT<br>AAGACGAACATGCTGTGATGGCATAGTTTGCTCTCCTGGGTATGTTA<br>TTGATTAGAAAAATCGTCCCTGTTCTTGCAGGCTTCTATGTCCCGGAC<br>CAGAATGTTATTCTTCATTTGGGAAGATTTGGCAAGTGGATTTATTTT<br>TATTTGAAATTGGAATATGTGCAGTACTATGTATGATATGGAGCAGA |
|-------------|----------------|--------|---------|----|-------|-------------------------------------------------------------------------------------------------------------------------------------------------------------------------------------------------------------------------------------------------------------------------------------------------------------------------------------------------------------------------------------------------|-----------------------------------------------------------------------------------------------------------------------------------------------------------------------------------------------------------------------------------------------------------------------------------------------------------------------------------------------------------------------------------------------------------------------------------------------------------------------------------------------------------------------------------------------------------------------------------------------------------------------------------------------------------------------------------------------------------------------------------------------------------------------------------------------------------------------------------------------------------------------------------------------------------------------------------------------------------------------------------------------------------------------------------------------------------------------------------------------------------------------------------------------------------|

Protease inhibitor

| ID          | ID/Reference protein | e-value | PFAM domain | MW (Da) | Sub-classification | Amino acid sequence                                                                                                                                                                                                | Nucleotide sequence                                                                                                                                                                                                                                                                                                                                                                                                                                                                                                                                                                                                                      |
|-------------|----------------------|---------|-------------|---------|--------------------|--------------------------------------------------------------------------------------------------------------------------------------------------------------------------------------------------------------------|------------------------------------------------------------------------------------------------------------------------------------------------------------------------------------------------------------------------------------------------------------------------------------------------------------------------------------------------------------------------------------------------------------------------------------------------------------------------------------------------------------------------------------------------------------------------------------------------------------------------------------------|
| TatPlnSrp01 | JAT91131.1           | 4 e-58  | PF00079     | --      | Serpin-like        | FQGGEEVVSVMETRNTRTVFYGNFSEYGFEAVKMPYK<br>GEDISMLVLLPFERNGLSGVEQELNSSKLDDEVISKMKKG<br>KFNVKIPKFRLLKDRKHLRKNLNLFLGVKSFTNKANFTGI<br>SGEGNLEVSKHRYRAVVEVNEKGSEAAAGATAEFARFGKS<br>RGRPKPGNFYVNHPPVFVFIREDRTGMILFYGRVNKL | TTTCAGGGCGGCGAAGAGGTAGTTTCAGTTCAAATGATGGAAACAA<br>GGAATACAGTTTTTTATGGAAATTTACGCGAATATGGTTTTGAAGCT<br>GTGAAAATGCCATACAAAGGTGAGGATATCAGTATGTTAGTGCTTCT<br>ACCATTTGAAAGAAACGGCCTAAGTGGGGTAGAACAGGAGTTGAAT<br>TCCAGTAAATTAGACGATGTTATCTCCAAGATGAAAAAGGGAAAGTT<br>TAATGTAAAGATCCCAAAATTTAGACTGAAAGACAGGAAACACCTA<br>AGAAAAATCTAACTTCTTAGGGGTGAAAAGTGCATTACAAAATA<br>AGGCAAATTTTACTGGAATTTCTGGAGAAGGAAATTTGGAAAGTGCA<br>AAGATTATTTACAGAGCTGTGGTTGAAGTCAATGAAAAGGGTAGCG<br>AAGCAGCAGGGGCCACTGCCGAATTTGCCAGGTTTGGGAAATCCAG<br>AGGTAGACCAAAGCCGGGAAATTTTATGTAAACCATCTTTTGCT<br>TCTTCATTAGAGAAGACAGGACTGGAATGATTCCTTTCTATGGAAGG<br>GTCAATAAATTGTAA |

|             |            |        |         |    |             |                                                                                                                                                                                                                                                                                                                                                                                                                                                                                                                                                                                                                                                                                                                                                                                                                                                                                                                                                                                                                                                                                                                                                                                                                                                                                                                                                                                                                                                                                                                                                                                                                                                                                                                                                                                                                                                                                                                                                                                                                                                                                                                           |
|-------------|------------|--------|---------|----|-------------|---------------------------------------------------------------------------------------------------------------------------------------------------------------------------------------------------------------------------------------------------------------------------------------------------------------------------------------------------------------------------------------------------------------------------------------------------------------------------------------------------------------------------------------------------------------------------------------------------------------------------------------------------------------------------------------------------------------------------------------------------------------------------------------------------------------------------------------------------------------------------------------------------------------------------------------------------------------------------------------------------------------------------------------------------------------------------------------------------------------------------------------------------------------------------------------------------------------------------------------------------------------------------------------------------------------------------------------------------------------------------------------------------------------------------------------------------------------------------------------------------------------------------------------------------------------------------------------------------------------------------------------------------------------------------------------------------------------------------------------------------------------------------------------------------------------------------------------------------------------------------------------------------------------------------------------------------------------------------------------------------------------------------------------------------------------------------------------------------------------------------|
| TatPinSrp02 | CAX51426.1 | 9 e-89 | PF00079 | -- | Serpin-like | <p>MLRTMPSKDQSLKDEWDVSVKKKPTMWKTWVRCSI<br/> IFFLMLVVLAVVLLVMCGYVYRHDFLGFIQKPFTEPTS<br/> HAFRDERIHAGTVRMVARWLNHANQNENAVWSPLTVI<br/> LGLSLLLEGTTGQTAYEIKSTMGWIGIDKSYVRSYLSRVI<br/> TRLNNLQHLDVIVANRMFLHDSYDVTSAYKNILNQHYQ<br/> VSIDHLDFTNANALQSINKWGLEESRGQIKELIPLDVIDP<br/> TTKMVVLSTLLTFKGEWKLPFSPNRTKKAFTSISGKKRQ<br/> VDMMYQTGKFMYGEPFAHGFSALELPYSEPNMTMVVL<br/> LPRSLSLKAMLKEQDGTMLMNLSSKMTRTDVEVCIPK<br/> FTIEKGTTIENQLSSLGIRRLFDPSFANLELISPNSELYVQ<br/> KITHRVKIEVFESGTSQGASSSSILEGRSLTSSFCADHPFIF<br/> YVEDKETNSVVFVWGEFNGPED</p> <p>ATGCTAAGAACGATGCCGTCTAAAGATCAGTCGCTGTTAAAAAGACAC<br/> AGAATGGGATGTAAGTGTCAGAAAAAGCCAACATGTGGAAAAACG<br/> TGGGTGAGATGCAGTATAATATTTTTCTGATGTTAGTCGTGCTGGCC<br/> GTTGTATTGTTAGTTATGTGCGGTTACGTATATCGACACGATTTCCTT<br/> GGATTCATTCAATTGAAGCCTTTCACAGAACCGACTTCTCACGCCTTT<br/> AGAGATGAACGTATTCACGCTGGAACAGTGCGTATGGTGGGTAGATG<br/> GCTTAATCACGCGAACCAAGATGAAAACGCAGGTGGTGCACCCCTTA<br/> CTGTCATATTAGGCCTTAAGTCTATTGCTAGAAGGCCAACCTGGACAG<br/> ACTGCGTACGAAATCAAGTCAACTATGGGATGGATTGGTATAGACAA<br/> AAGCTACGTACGTTCTTACCTTTACGCGGTGATAACACGCTTGAACA<br/> ATTTGCAGCACTTGGATGTAATAGTCGCTAACC GGATGTTCCCTTCATG<br/> ATTCCTACGACGTCACCTCCGCGTATAAAAAATATTTGAATCAACACT<br/> ACCAAGTTTCCATCGATCACCTAGATTTTACTAACCGCTAATGCATGC<br/> AAAGTATTAAATAAATGGGGATTAGAGAAAGCCGCGGACAGATCAA<br/> AGAATTAATTTCCATTAGATGTTATTGACCCCAACCAATTAATGGTAC<br/> TATCGACGCTTCTTACTTTTAAAGGTGAGTGGAAGCTACCTTTTCTC<br/> CAAATCGTACCAAGAACGAGAGTTTACATCAATAAGCGGAAAGAA<br/> ACGTCAAAGTCGACATGATGTACCAAGACGGGAAATTTATGTACGGTG<br/> AATTTCCGGCTCACGGATTTTCTGCGCTGGAATTACCATATTCTGAAC<br/> CTAATATGACCATGGTGGTTTTGTACTCTCGGAGTTGTCTCTCTGA<br/> AAGCGATGCTAAAGGAACAAGATGGGACAATGCTAATGAACCTGAG<br/> CTCTAAAAATGACGAGAACTGACGTGGAAGTGTGCATACCCAAATTTA<br/> CGATAGAAAAAGGGACAAACGATAGAAAAACCGCTGTCTTTTGGG<br/> AATCAGGAGATTATTTGATCCATCATTTGCAAATCTAGAATTGATAT<br/> CACCTAATTCTGAAGTGTATGTGCAGAAAATAACCCACAGAGTAAAA<br/> ATAGAAGTATTGAAAGCGGAACCTCAGGTCAAGCTTCTTCATCGTC<br/> CATTTTGGAAGGACGTTCACTGACGTCATCTTCTGCGCGGATCACCC<br/> CGTTTATATTCTACGTGCAAGACAAGGAACTAATTCTGTGTGTTTT<br/> GGGGCGAATTCACGGGCCTGAGGATTAA</p> |
| TatPinSrp03 | JAT91147.1 | 0      | PF00079 | -- | Serpin-like | <p>MLQAFFALFLLPLAHGLGFTRAIPSSGITALIEGSNNFGFE<br/> LYKAIQSDDNLVFSWVSISVGMAMLYLGARNYTAREIES<br/> VLYQNDQGVSAAREMMVAYQLDRLMKRKAQLELTKF<br/> NAAVIQGGSPVSETYRHRLFHYFNSVLYDLDMKQNGKL<br/> VKDWINILAEIKTGGLIKDILTRVPTEDSKLILLSGIHYKG<br/> QWVEKFDPEKTTNGKFFNHGNMATTAAALMLSTSNTY<br/> YYSYANNLHVLQIPLEGRFAMTFVMPEENATLEEVAQK<br/> LNPKLLQKVLEQDASSKMIKLVLPKFLEVRKDLSEPLK<br/> EMGMHTLFSPVNSDLTGIDATGDLFLKDVVHQATVEVN<br/> EEGVAAAATTVLGVESRLGAPYISFNRPFMFVRDLDR<br/> LILFMGHLKDCSEVCGVSNYVQVESQSLFR</p> <p>ATGCTACAAGCGTTCTTCGCGTTGTTCCCTCCTGCCTTTAGCTCATGGC<br/> TTAGGCTTTACCAGAGCGATACCATCCTCAGGAATCACAGCTCTAAT<br/> AGAAGGCAGCAATAACTTTGGTTTCGAATTGTATAAAGCCATCCAAA<br/> GCGATGATAACCTCGTATTCTCACCATGGAGCATCTCAGTAGGTATG<br/> GCCATGTTATATCTGGGTGCTAGGAACATAACAGCTCGTGAATAGA<br/> GTCAGTTCTCTATCAAAATGATCAGGGTGTCTTGCTAGAGAAATGA<br/> TGGTGGCATATGGACAGTTAGATCGTCTAATGAAAAGAAAAGCTCA<br/> GCTGGAACTCACAAAAATTTAATGCTGCAGTTATTCAGCAAGGTTCCC<br/> CTGTTTCAGAGACCTACAGACATAGACTCTTCCATTATTTCAATTCCG<br/> TTCTTTATGATTTGGATATGAAGCAAAATGGAAGAACTGGTGAAAGAT<br/> TGGATAAACATCTTAGCAGAAATCAAACTGGAGGATTGATAAAAG<br/> ACATCCTTACGAGAGTCCCTACTGAAGATAGCAAACTAATATTGCTC<br/> AGTGGGATCCATTATAAAGGACAATGGGTAGAAAAGTTCGATCCTG<br/> AGAAAACCACTAATGGGAAGTTTTTAACCACGGAAATATGGCCACT<br/> ACTGCAGCTTTGATGTTGTCTACTTCTAATTATACGTATTACTACAG<br/> TACGCAAAATAATTTGCACGTGCTCCAAATTCCTGAGGGTAGATT<br/> TGCAATGACCTTCGTTATGCCAGAAAGAGAAATGCCACTCTCGAAGAAG<br/> TAGCACAGAACTTAATCCCAAAATTGCTACAGAAAGGTTCTTGACAA<br/> GATGCTTCATCTAAAATGATTAAGCTTGATTGCCTAAGTTTAAATTG<br/> GAAGTAAGAAAAGATCTCTCTGAACCCCTTAAAGAAATGGGGATGC<br/> ACACGTTGTTTTACCTGTAATTTCTGATCTAACTGGGATAGATGCA<br/> ACTGGAGACTTGTTTCTCAAAGACGTGCTTATCAAGCCACAGTTGA<br/> AGTAAATGAAGAAGGTGTCGAGGCAGCAGCCACTACAGTACTGGG<br/> GTAGAAAAGTAGATTAGGAGCCCGTATATTTCAATTCACCCGTCATT<br/> CATGTTCTTTGTTTCGAGACCTTGACACTAGACTCATTTTGTATTGGG<br/> ACATCTTAAGGACTGCAGTGAAGTATGCGGAGTTTCCAACATATGTGC<br/> AGCAAGAAAGTCAATCGCTTTTCCGTTAA</p>                                                                                                                                                        |

|             |            |         |         |    |             |                                                                                                                                                                                                                                                                                                                                                                                                                                                                                             |                                                                                                                                                                                                                                                                                                                                                                                                                                                                                                                                                                                                                                                                                                                                                                                                                                                                                                                                                                                                                                                                                                                                                                                                                                                                                                                                                                                                                                                           |
|-------------|------------|---------|---------|----|-------------|---------------------------------------------------------------------------------------------------------------------------------------------------------------------------------------------------------------------------------------------------------------------------------------------------------------------------------------------------------------------------------------------------------------------------------------------------------------------------------------------|-----------------------------------------------------------------------------------------------------------------------------------------------------------------------------------------------------------------------------------------------------------------------------------------------------------------------------------------------------------------------------------------------------------------------------------------------------------------------------------------------------------------------------------------------------------------------------------------------------------------------------------------------------------------------------------------------------------------------------------------------------------------------------------------------------------------------------------------------------------------------------------------------------------------------------------------------------------------------------------------------------------------------------------------------------------------------------------------------------------------------------------------------------------------------------------------------------------------------------------------------------------------------------------------------------------------------------------------------------------------------------------------------------------------------------------------------------------|
| TatPinSrp04 | KFM76460.1 | 4 e-120 | PF00079 | -- | Serpin-like | <p>MIWLSVLAVLVLENAQRYEAKSDILFPTEPQFFLPRFT<br/> GDENLKVIEAINDFAFSLYWKLPREGNLLTSPMSLSTAM<br/> AMLYYGAQNETKREMSKALGYDGAKLDYDEVHRGFH<br/> QVLKSLKNKNAEYDLETANAVLIQKDYPVLASYSQVE<br/> QIYNATIQELDFAQGDIALKMINAWTAWRTRDKIKELL<br/> KKPLDSLTRLFLLNAVYFKGTWTKFDQRITTPDTFYNN<br/> GRIPKTVPMMLKAKLAFGIDRLKCSILEMPYTGEVVS<br/> MVILLPLERDGLPELEKSMSAEVLSNLTSSLRKETVQVTI<br/> PRFKLDDEHELKDVLSKMGMPSLFDPYTANLSGISKIEQ<br/> LYVTLVVHKTVLVDVNEEGTEAAGVTGIAAGVRIGGPYF<br/> SAQHPFLIFIRDIRSNMIYFMARVNEL</p> | <p>ATGATTGGCTGTCAATTGGTGTTAGCTGTGTTGGTTTTGGAAATGCT<br/> CAGAGGTATGAAGCAAAATCAGATATCCTGTTCCCAACAGAACCAC<br/> AATTTTTCTTACCTCGATTTACTGGTGATGAAAACCTTAAAGTAATTG<br/> AGGCTATCAACGATTTTGCCTTCTCTATACTGGAAGTTACCAAGA<br/> GAAGGAAATCTATTAACATCTCCAATGAGTTTGCTCCACTGCAATTGGC<br/> TATGTTGTATTACGGTGCACAAAACGAAACGAAAAGAGAAATGTCA<br/> AAAGCGTTAGGGTATGATGGTGCAAAGTTAGATTATGATGAAGTTCA<br/> CCGAGGGTTCCATCAGGTATTGAAAAGCTTAAAGAACAAGAATGCA<br/> GAATACGATCTGGAGACTGCAAAATGCTGTTCTAATTACAGAAAGATTA<br/> TCCAGTGTTAGCCTCTTACAAATCTCAAGTGGAGCAAATATACAACG<br/> CTACCATTCAAGAATTAGACTTCGCCCCAAGGAGACATAGCTCTTAAA<br/> ATGATCAATGCATGGACCGCATGGAGGACTCGCGATAAAATCAAAG<br/> AATTGTAAAGAAGCCACTGGATTCGCTAACAAGGCTATTTCTATTA<br/> AATGCTGTTATTTTAAAGGAACATGGAAGAACTAAGTTTGACCAGCG<br/> TATCACAAACACCAGATACTTCTACAACAATGGGGCGCATACCAAAAA<br/> CTGTACCCATGATGAGATTAAGAAGCTAAACTGGCTTTTGGAATAGAT<br/> CGTCGGTTGAAAGTGTTCATCTTAGAAATGCCATACACGGGTGAAGA<br/> GGTCAGTATGGTAATCTTGTGCCATTGGAAAAGAGACGGTCTCCCTG<br/> AACTGGAAGTCAATGTCTGCAGAAAGTGTATCCAACCTTACATCG<br/> TCTCTTAGAAAAGAAACAGTTCAAGTAACGATACCACGTTTTAAACT<br/> AGACGATGAACACGAATTGAAAGATGTGCTAAAGATATGGGAATG<br/> CCATCTTTGTTGATCCATATACCGCAAACCTATCAGGTATTAGCAAA<br/> ATAGAACAGCTGTACGTTACTTTAGTGGTGCACAAAACCGTTTTAGA<br/> CGTCAACGAAGAAGGTACAGAAGCGGCAGGTGTTACAGGCATAGCT<br/> GCGGGTGTGAGGATAGGAGGCCCATATTTTCGGCTCAGCATCCATT<br/> TTTAATTTTTATTCCGCACATTAGATCAAAATATGATTTACTTCATGGC<br/> TCGCGTTAATGAGTTGTAG</p> |
| TatPinSrp05 | JAT91131.1 | 7 e-81  | PF00079 | -- | Serpin-like | <p>MTVDQSCIVYIITILATLIVFSTATSPDNDLTNVTAAANN<br/> FAFKFLKTIEWKENAFFSPASLFIGLGMLYRGARSNTAK<br/> EMRHALSYDLADVDPTNLHRRIRVLLNSLNDNKGQYVL<br/> EIANALITQMGYRVRNEYRKALRRYYDTYFKEVDFKSN<br/> KEKAIKDINEWVIEKSKGKVPKIVDDLEDDTRLILLNAA<br/> YFKGTWKVEFNPTFTSTETFYNYGKDAVTVTMMNTKN<br/> RFPYGVFINRGIQALQLPYKGEDIRMVILLPLKLDGLKEL<br/> EEILNAEEFNHAGMEESLVAVSLPKFKLKDARSLKDNL<br/> KDLGMVSAFGNRADFSAISWNNNLLSIIHKSVIEVNE<br/> EGSEAVSFVAMLMRSKSADEVDTFIVDGPFLFFIRDNR<br/> NGMILFMGRVDKL</p>            | <p>ATGACAGTTGACCAAAGTTGCATCGTATATATTATAACAATACTGGC<br/> AACACTGATTGTTTTTCAGTACCCGAACAAGCCAGATAATGATCTTA<br/> CTAATGTAACAGCTGCCAATAACGACTTTGCCCTCAAATTTCTGAAA<br/> ACAATAGAATGGAAAGAAAATGCTTTTTTCTCCCGAGCCAGCTGTT<br/> TATTGGTTTTGGGTATGCTCTACCGAGGTGCTCGGTCTAATACAGCTA<br/> AAGAAATGCGCCATGCCCTTTCGTATGATCTAGCAGATGTAGATCCA<br/> ACAAATCTTCATAGGCGTATAAGAGTGCTACTAAATTCTCTGAATGA<br/> TAACAAAGGACAGTATGTACTAGAAATTGCCAATGCCCTCATAACAC<br/> AGATGGGCTATCGAGTAAGAAATGAATATAGAAAAGCTCTAAGAAG<br/> ATACTACGACACTTACTTCAAAGAAGTGGACTTTAAGTCAAACAAAG<br/> AAAAAGCAATCAAAGATATCAATGAGTGGGTATTGGAAGAGTAA<br/> AGGAAAGGTACCGAAGATCGTTGATGACCTAGAAGATGATACCAGG<br/> TTGATTCTTTGAATGCTGCTTACTTCAAAGGAAGTGAAGGTTGAA<br/> TTCAACCTTACATTCACTTCAACAGAAACGTTTTACAATTATGGTAA<br/> GGATGCTGTGACTGTTACTATGATGAATACTAAAAATAGATTTCCTT<br/> ATGGTGTTTTTATAAATAGAGGGATTCAAGCTCTTCAGTACCCTAC<br/> AAAGGTGAGGATATAAGGATGGTTATATTGCTTCCTCTAAACTAGA<br/> TGGTTTGAAAGAACTGGAGGAAATCTGAATGCTGAAGAGTTTAATT<br/> CTATAATTGCTGGTATGGAAGAATCACTAGTGGCAGTCTCTTGCCG<br/> AAGTTTAAAGCTCAAAGATGCTAGGAGTTTGAAGGATAATTTGAAAGA<br/> TTTAGGGATGGTGTGAGCAATTTGGAAACAGAGCAGACTTTTCCGCTA<br/> TTAGTTGGAATAATAATTACTGTTATCTGACATCATAACATAAATCTG<br/> TTATTGAGGTGAATGAGGAAGGAAGTGAAGCTGTCTCATTTGTTGCC<br/> ATGTTGATGAGGTCAAATCAGCTGCTGATGAAGTAGACACTTTTAT<br/> TGTGATGGGCCTTTTTATTCTTTATTAGGGATAATCGAAATGGAAT<br/> GATTTTATTATGGCCGTGTTGACAAGTTGTAA</p>                                                |



|             |                |        |         |    |             |                                                                                                                                                                                                                                                                                                                                                                                                                                                                                                                                                                                                                                                                                                                                                                                                                                                                                                                                                                                                                                                                                                                                                                                                                                                                                                                                                                                                                                                                                                                                                                                                                                                                                                                                            |
|-------------|----------------|--------|---------|----|-------------|--------------------------------------------------------------------------------------------------------------------------------------------------------------------------------------------------------------------------------------------------------------------------------------------------------------------------------------------------------------------------------------------------------------------------------------------------------------------------------------------------------------------------------------------------------------------------------------------------------------------------------------------------------------------------------------------------------------------------------------------------------------------------------------------------------------------------------------------------------------------------------------------------------------------------------------------------------------------------------------------------------------------------------------------------------------------------------------------------------------------------------------------------------------------------------------------------------------------------------------------------------------------------------------------------------------------------------------------------------------------------------------------------------------------------------------------------------------------------------------------------------------------------------------------------------------------------------------------------------------------------------------------------------------------------------------------------------------------------------------------|
| TatPlnSrp06 | JAT91131.1     | 3 e-66 | PF00079 | -- | Serpin-like | <p>FKGTWKTRFSRRHTRHLFYNGGEEVVSQMMETRNT<br/>VFYGNFSEYGFEAVKMPYKGEDISMLVLLPFERNLSG<br/>VEQELNSSKLLDDVISKMKKGKFNVKIPKFRLLKDRKHLR<br/>KNLNLFLGVKSAFTNKANFTGISGEGNLEVSKIIRAVVE<br/>VNEKGSEAAAGATAEFARFGKSRGRPKPGNFYVNHFPVF<br/>FIREDRTGMILFYGRVNKL</p> <p>TTCAAAGGTACATGGAAAACCTCGGTTTTCTCGAAGACATACAAGGGA<br/>ACATCTCTTTTATAATGGCGGCGAAGAGGTAGTTTCAGTTCAAATGA<br/>TGGAAACAAGGAATACAGTTTTTTATGGAAATTCAGCGAATATGGT<br/>TTTGAAGCTGTGAAAATGCCATACAAAGGTGAGGATATCAGTATGTT<br/>AGTGCTTCTACCATTTGAAAGAAACGGCCTAAGTGGGGTAGAACAG<br/>GAGTTGAATTCCAGTAAATTAGACGATGTTATCTCCAAGATGAAAAA<br/>GGGAAAGTTAATGTAAGATCCCAAAATTTAGACTGAAAGACAGG<br/>AAACACCTAAGAAAAAATCTAAACTTCTTAGGGGTGAAAAGTGCAAT<br/>CACAAATAAGGCAAAATTTTACTGGAAATTTCTGGAGAAGGAAATTTGG<br/>AAGTGTCAAAGATTATTTACAGAGCTGTGGTTGAAGTCAATGAAAAG<br/>GGTAGCGAAGCAGCAGGGGCCACTGCCGAATTTGCCAGGTTTGGGA<br/>AATCCAGAGGTAGACCAAGCCGGGAAATTTTATGTAACCATCCT<br/>TTTGTCTTCTCATTAGAGAAGACAGGACTGGAATGATTCTTTCTAT<br/>GGAAGGGTCAATAAATTGTAA</p>                                                                                                                                                                                                                                                                                                                                                                                                                                                                                                                                                                                                                                                                                                                                                                |
| TatPlnSrp07 | XP_011215073.1 | 2 e-85 | PF00079 | -- | Serpin-like | <p>MDSAVASSNELSLKLLRICRNSTPEANLFYSPASITICLS<br/>MLKTGAKEETLKQIEEILSIGEDQCKDDGFGVLSRYLQE<br/>SKGPITLKISNILAVDQQFAIEPEFVNNLKLNYNSEMKE<br/>PFQSDPEKSRKEINRLVEEGTNGKIKDMLVPGSISSDSRL<br/>VLANAIYFMGKWQTRFKRYETRKVPFYTINEENSMVD<br/>MMFKMESYKYIHSKDLNADIIIEVPYLGETVSLIILLPFER<br/>FGLPLLEKNISVQKLNHAVGQMOMENYVELGLPKFKLE<br/>EKISLEEHLQNMGMTEAFIKGAANFSGISGEGNLCSSAI<br/>HKTFLDINEEGTEAAAATGLEIMLCCLPPPPRFHFTVDHP<br/>FMLLIRESTTGLILFLGSVNNL</p> <p>ATGGATTCTGCAGTTGCATCTTCTAATGAATTAAGCTTGAACTTCTT<br/>CGTATATGTAGAAATAGCACACCAGAAGCGAATCTATTTATTCGCC<br/>AGCCAGTATTACGATATGTTTGTCTATGCTGAAAACCTGGTGCAAAAG<br/>AAGAAACGCTAAAGCAATCGAAGAGATTCTAAGTATTGGAGAAGA<br/>TCAGTGC AAGGATGATGGATTCCGAGTTCCTTCGAGATATTTGCAAG<br/>AATCAAAAGGTCTATTACTTTGAAGATATCAACATACTCGCTGTT<br/>GATCAGCAGTTTGCATAGAACCAAGATTCGTTAATAATTTAAAAATT<br/>AAATTATAACTCTGAGATGAAAGAGCTTCCATTTTCAGTCCGATCCGG<br/>AAAAGTCCAGGAAAGAAATAAAATCGTTTGGTAGAAGAAGGCACGAA<br/>TGGAAAAATTAAGACATGCTTGTACCAGGATCGATCTCTTCAGATT<br/>CCAGACTCGTTTTGGCCAATGCTATTTATTTATGGGGAAATGGCAA<br/>ACTAGATTTAAGCGATATGAAACAAGAAAAGTTCCCTTCTATACAAT<br/>TAATGAAGAGAACTCTATGGTAGATATGATGTTTAAATGGAGTCTT<br/>ATAAATATATCCATAGTAAGGATTTAAATGCAGACATAATCGAAGTA<br/>CCATATCTAGGAGAAACAGTTAGTTTGATCATATTACTTCCATTGAA<br/>AGATTTGGTCTCCCTCTTCTTGAAAAGAATATTTCTGTACAGAAGTTG<br/>AACCACGAGTTGGGCAATGCAGATGGA AAACTATGTAGA ACTTG<br/>GACTTCCAAAGTTTAAACTGGAGGAGAAAATCTCTCTCGAAGAACAT<br/>CTACAGAATATGGGAATGACAGAAGCATTCAATTAAGGAGCAGCTA<br/>ACTTTTCAGGATTTCTGGTGAAGGAAACCTATGTCTCTCATCCGCTA<br/>TCCATAAAACATTCTTGATATCAACGAAGAGGGCACAGAAGCAGCT<br/>GCAGCCACTGGATTAGAAATTATGCTGTGTTGTTTACCTCCACCTCCT<br/>CGTTTTCACTTTACCGTGGATCATCCTTTCATGCTGTTGATCCGCGAA<br/>TCAACTACTGGACTAATCCTATTTCTTGGAAGTGTTAACAACCTATAG</p> |

|             |                |         |         |    |             |                                                                                                                                                                                                                                                                                                                                                                                                                                                                                                                                                                                                                                                                                                                                                                                                                                                                                                                                                                                                                                                                                                                                                                                                                                                                                                                                                                                                                                                                                                                                                                                                                                                                                                                                                                                                                                                                                                                             |
|-------------|----------------|---------|---------|----|-------------|-----------------------------------------------------------------------------------------------------------------------------------------------------------------------------------------------------------------------------------------------------------------------------------------------------------------------------------------------------------------------------------------------------------------------------------------------------------------------------------------------------------------------------------------------------------------------------------------------------------------------------------------------------------------------------------------------------------------------------------------------------------------------------------------------------------------------------------------------------------------------------------------------------------------------------------------------------------------------------------------------------------------------------------------------------------------------------------------------------------------------------------------------------------------------------------------------------------------------------------------------------------------------------------------------------------------------------------------------------------------------------------------------------------------------------------------------------------------------------------------------------------------------------------------------------------------------------------------------------------------------------------------------------------------------------------------------------------------------------------------------------------------------------------------------------------------------------------------------------------------------------------------------------------------------------|
| TatPInSrp08 | XP_015915292.1 | 7 e-120 | PF00079 | -- | Serpin like | <p>MQKIVLILAGHIAVSSSRCIQTNNTIDTTDIERSLPSLQYGS<br/>TNFALEMFRVLHSESSIPDNLFFSPVSIWTALVTIFEGAR<br/>QQTEKELASVVLGNISPALLPALDAFLQSCSSCQEGD<br/>KPNVKIANRIYFQDGLFELCNQQLKIIHKIDFESDPEK<br/>ARDTINNFVESVTNGKIQELIPNSVGPLTQMIIANAVYF<br/>KGTWKNQFPSPMTRQVRFNVDRDSTVTVSMMNTIGTY<br/>FYGVSDQMDCQALEIPYNDDRVSMLILLPKHSFRGLDTL<br/>ARTISPERLKALLNSMVSREVLVSIPKFKVEQEYEMSKP<br/>LQKMGLRNLFDPRFSDLGFTGARRLNLDAIHHKSYIKV<br/>NEEGTEAAAATAFVISRTGTQDSGITRFYADRPFLYFIRD<br/>SYSGSMLFMGTVRSPPRYDEN</p> <p>ATGCAGAAGATAGTTTTAATATTGGCTGGGATCATCGCAGTTTCCTC<br/>CTCGAGATGTATACAAACGAACAACACGATTGATACAACAGATATC<br/>GAAAGAAGTTTACCATCCTTGCAATATGGAAGCACAAATTTTGCAAT<br/>GGAGATGTTTCGAGTTCTCCACAGTGAATCGTCCATACCTGATACT<br/>TGTTTTTCAGTCCCGTGAGTATATGGACAGCTCTTGTTACAATTTTTG<br/>AAGGAGCCAGACAACAGACAGAAAAAGAACTCGCATCTGTGCTTGG<br/>ACTAACCAATATTAGCCCCGCGCTACTTCCAGCGGCCTTGATGCAT<br/>TTCTTCAGAGCTGCAGCAGTTGCCAAGAGGAGATAAACCAAAATGTA<br/>AAGATAGCCAAACAGAATTTATTTTCAAGATGGTCTTGAGTTCAAAAT<br/>GTGTAACCAACAGTTGGAGAAAAATTATTCATAAAATAGACTTCGAAT<br/>CTGATCCAGAAAAGGCAAGAGATACTATAAAACAACCTTTGTGGAGAG<br/>TGTAACGAATGGGAAGATACAGGAATTGATACCCCCGAATTCGTGG<br/>GTCCACTTACTCAAATGATAATAGCGAATGCTGTATATTTTAAAGGA<br/>ACGTGGAAAAATCAGTTCCCTCCTTCTATGACGCGTCAGGTTTCGTTT<br/>AATGTAGATCGCGATTCTACTGTTACAGTGTGATGATGAACACGAT<br/>AGGAACGTACTTCTACGGCGTTAGCGATCAAATGGAGCTGTCAAGCAT<br/>TGGAGATTCTTACAACGATGACAGAGTAAGCATGCTTATCTTACTA<br/>CTTAAACACTCTTTCGAGGATTGGATACACTTGCTAGGACTATTAG<br/>TCCGGAACGACTGAAAGCTCTTCTAATTCTATGGTATCTCGAGAAG<br/>TTCTGGTTTCTATACCGAAATTCAAAGTTGAACAAGAGTACGAAATG<br/>TCTAAACCTCTTCAGAAGATGGGATTGCGTAATCTTTTCGATCTCGT<br/>TTCTCTGATTTATCCGGATTTACGGGAGCCAGGAGACTAAATCTAGA<br/>TGCCATTATCATAAAATCTTACATTAAGTTAACGAGGAGGGAACAG<br/>AAGCAGCCGCAGCAACAGCGTTTGTAAATATCGAGGACAGGGACACA<br/>AGATTCGGGGATCACACGTTTCTACGCAGACAGACCATTCTTGTACT<br/>TTATACGCGACTCTTATTTCTGGAAGTATGCTTTTCATGGGAACGTAA<br/>GATCACCAAGATACGATGAAAACCTGA</p> |
| TatPInSrp09 | XP_002407493.1 | 1 e-90  | PF00079 | -- | Serpin-like | <p>MEIAVSSSNQFNLKLLKIYQDEKKEGNTFYSPASITIALA<br/>MLYTGAQEKTRKQMEHILSIEGQHSIHEGFSSVFSLFQD<br/>LPSETVLNITNMLAIDQKYNILPEFSNDLKSYYNTQTRL<br/>DFFQSSKALAEINQLIEVATNGKIKDFFPNESIASDTILV<br/>LANAIYFKGLWSISFDEKNTSKKPFYITITNEERMVDMMF<br/>RRASFRISDSPNLNARLLEMPYIGNRLRMILILPTEKDGIS<br/>FVENNITVDNLNNAIKNLQKANDVRLSLPRFKLEESLPL<br/>KDCLIKMGMKDAFTDNADFSGITGNKDTLISAAFHKAFI<br/>DVNEEGTEASAVTGMVKIAKCSRPPPPVLFIVDHPFMFI<br/>IQEIGTGLILFTGSIRSL</p> <p>ATGGAAATTGCTGTTCTTCTCCTCAATCAGTTCAATCTTAAACTTTTG<br/>AAAATATATCAAGATGAGAAGAAGGAAGGAAATACATTTTATTCTC<br/>TGCCAGCATTACTATAGCACTTGCAATGCTATATACCGGTGCACAAG<br/>AAAAGACAAAGAAAACAAATGGAACACATCTTGAGATTGAAGGCCA<br/>GCATTCTATACACGAAGGATTCTCCTCTGTTTTAGCTTGTTTCAAGA<br/>CCTCCCAAGTGAAACTGTTTTGAACATTACTAATATGTTAGCTATTGA<br/>CCAAAAATATAATATATTGCTGCAATTTTCTAACGACTTGAAATCGT<br/>ATTATAACACACAAAACAAGATTGTATGATTTTGAATTTTCAGTCATCA<br/>AAAGCACTAGCAGAAATCAATCAGTTAATTGAAGTTGCTACTAATGG<br/>AAAAATAAAGACTTCTTTCTAATGAAAGTATGCTTCAGATACCA<br/>TCTTAGTGTTAGCTAATGCTATTTATTTTAAAGGGTCTCTGGAGTATAT<br/>CTTTTGATGAAAAAACACATCTAAAAAGCCTTTCTATACAATAACA<br/>AATGAAGAGAGAATGGTTGACATGATGTTTCAAGAGGCTAGTTTTCG<br/>TATTTCTGATAGTCCCAATTTAAATGCAAGATTGCTTGAATGCCTTA<br/>CATAGGAACAGATTACGTATGATCTTGATACTTCCAACCTGAAAAAG<br/>ATGGTATCTCCTTTGTTGAAAAACAATATAACTGTTGATACTTGAAC<br/>AATGCTATTAAAAATTTACAAAAGGCAATGACGTACGTTTATCACT<br/>TCCAGATTCAAATGGAAAGAAAGTCTTCCATTAAAAAGATTGCTTGA<br/>TAAAAATGGGAATGAAAGATGCATTCACAGATAATGCTGATTCTCA<br/>GGAATCACTGGCAACAAAGATACCTTAATTTCTGCTGCTTTCCATAA<br/>AGCATTTATTGATGTAAATGAGGAAGGCACAGAAGCATCAGCTGTA<br/>ACTGGTATGGTAAAGATTGCTAAATGTTCTAGACCTCCCCACCACC<br/>TGTAATTATTATTGTTGATCACCCCTTCATGTTTATTATACAAGAGAT<br/>TGGCACAGGGCTATTCTTTTCACTGGAAGTATTCGATCATTGTAA</p>                                                                                                                                                                                    |

|             |                |         |         |    |             |                                                                                                                                                                                                                                                                                                                                                                                                                                                                                                                                                                                                                                                                                                                                                                                                                                                                                                                                                                                                                                                                                                                                                                                                                                                                                                                                                                                                                                                                                                                                                                                                                                                                                                                                                                                                                                                                       |
|-------------|----------------|---------|---------|----|-------------|-----------------------------------------------------------------------------------------------------------------------------------------------------------------------------------------------------------------------------------------------------------------------------------------------------------------------------------------------------------------------------------------------------------------------------------------------------------------------------------------------------------------------------------------------------------------------------------------------------------------------------------------------------------------------------------------------------------------------------------------------------------------------------------------------------------------------------------------------------------------------------------------------------------------------------------------------------------------------------------------------------------------------------------------------------------------------------------------------------------------------------------------------------------------------------------------------------------------------------------------------------------------------------------------------------------------------------------------------------------------------------------------------------------------------------------------------------------------------------------------------------------------------------------------------------------------------------------------------------------------------------------------------------------------------------------------------------------------------------------------------------------------------------------------------------------------------------------------------------------------------|
| TatPlnSrp10 | JAT91131.1     | 2 e-105 | PF00079 | -- | Serpin-like | <p>MIKMNFFVLPLLSFIDSEQLVISGETSVKELAVANNKFA<br/>FKLYKTFNSDGNFWSPISVLTAI GTLYTGARLKTAE EIR<br/>HAVLNTVAGLSDEQINKAFHALIRSLSGGSDEGRLDIAN<br/>AVIIRNSNPILREYKQNLRYFYSSIVKEMNPEIDSEELIRDI<br/>NSWIRKRTYGKITELLESIDYDTVLVLLNAVYFKGKWK<br/>KPFLDILTEKEPFYNKGIHATTVMMIQENHFFYGNFPE<br/>YDIHALKMPYLGDKFSMIILLPFQRNGLWRLEENLTPNM<br/>FDHIVANLKNQNVIVKLPKFKLEDSRDIKRSCLKMLGMK<br/>SAFTDKADFGGINKDANLKISKIIHKAVIEVNEAGTEVA<br/>GATGVVAIPRMFQEARYFLVEHPFLFFIRNEVTGAIVFFG<br/>RLNEL</p> <p>ATGATAAAAAATGAAC TTCTTCGTATTACCA TTGCTGCTGCTGTTCA TT<br/>GATAGTGAACAGCTAGTTATATCTGGAGAAA CTAGCGTAAAAAGAAC<br/>TAGCAGTAGCTAATAACAAGTTTGCC TTCAAACGTGTACAAAAC TTIT<br/>AACTCCGACGGAAATGCTTTT TGGTCTCCAATTAGTGTCTTACTGCC<br/>ATTGGAACGCTATATACAGGAGCCAGATTGAAAAACAGCGGAAGAAAA<br/>TTCGT CATGCCGTTTAAATACCGTTGCAGGATTAAGTGATGAACAG<br/>ATAAACAAAGCCTTTCACGCTTTGATTCTGTTCCCTTTCAGGAGGATCT<br/>GATGAGGGGAGATTAGACATTGCTAATGCTGTAATCATTCGTAATAG<br/>TAACCCAATATTGAGAGAATACAAACAGAA TTTGAGATACTTTTATA<br/>GCTCCATAGTGAAAGAAATGAATCCCGAGATCGACTCTGAGGAGCT<br/>GATTCGTGATATCAACAGCTGGATTAGAAAGAGAACTTATGAAAAA<br/>ATAACAGAGTTGCTAGAATCTATAGATTATGATACAGTGCTAGTGCT<br/>TCTGAACGCAGTTTATTTCAAGGGTAAGTGAAAAAAGCCATTCTAG<br/>ATATCCTCACTGAAAAAGAACCGTTT TATAATAAAGGAATTCACGCT<br/>ACTACTGTATCCATGATGATTCAGAGAA TCATTCTCTATGGAAAT<br/>TTTCCTGAATATGACATTACGCTTTTAAAGATGCCTTACTTAGGTGAT<br/>AAATTCAGCATGATTATACTTCTGCCC TTTCAAAGAAATGGTCTTTGG<br/>CGATTAGAAGAAAACTTAACTCCTAATATGTTCGATCATATTGTTGC<br/>GAATTTAAAAAATCAAATGTCATAGTTAAATTCGCCTAAGTTCAAAC<br/>TGGAAGATTCTAGAGACATAAAGCGTAGTTTGAAAATGTTAGGAATG<br/>AAAAGCGCTTTTACAGATAAAGCTGATT TGGTGATTAATAAAGA<br/>CGCCAATCTGAAAATATCCAAGATCATT CACAAAGCAGTGATAGAA<br/>GTAAATGAAGCGGGAACCGAAGTGGCTGGTGCGACTGGTGTAGTTG<br/>CTATTCCAAGGATGTTTCAAGAGGCAAGATATTCTCGTAGAGCAT<br/>CCCTTTTGT TTTTCATTAGAAATGAAGTAACGGGAGCGATCGTGTT<br/>TTTGGACGCCTCAATGAATTATAA</p> |
| TatPlnSrp11 | XP_014715077.1 | 1 e-83  | PF00079 | -- | Serpin-like | <p>MGIPAMDSAVASSNELSLKLLRICRNSTPEANLFYSPASI<br/>TICLSMLKTGAKEETLKQIEEILSIGEDQCKDDGFGVLSR<br/>YLQESKGPITLKISNILAVDQQFAIEPEFVNNLKLNYNSE<br/>MKELPFQSDPEKSRKEINRLVEEGTNGKIDMLVPGSISS<br/>DSRLVLANAIYFMGKWQTRFKRYETRKVPFYTTINEENS<br/>MVDMMFMESYKYIHSKDLNADIEVPYLGETVSLIILL<br/>PFERFGLP LLEKNISVQKLNHAVGQMOMENYVELGLPK<br/>FKLEEKISLEEHLQNMGMTEAFIKGAANFSGISGEGNLC<br/>LSSAIHKTFLDINEEGTEAAAATALEITLYCLPPPPRFHFT<br/>VDHPFMMLIRESTTGLILFLGSVNNL</p> <p>ATGGGTATACCAGCGATGGATTCTGCAGTTGCATCTTCTAATGAATT<br/>AAGCTTGAAACTTCTTCGTATATGTAGAAATAGCACACCAAGAAGCGA<br/>ATCTATTTTATTCGCCAGCCAGTATTACGATATGTTGTCTATGTGTA<br/>AAACTGGTGCAAAAAGAAGAAACGCTAAAGCAAAATCGAAGAGATTCT<br/>AAGTATTGGAGAAGATCAGTGCAAGGATGATGGATTCCGAGTTCTTT<br/>CGAGATATTTGCAAGAATCAAAGGTCCTATTACTTTGAAGATATCA<br/>AACATACTCGCTGTTGATCAGCAGTTTGCGATAGAACCAGAAATTCGT<br/>TAATAATTTAAAAATTAATTATAACTCTGAGATGAAAGAGCTTCCAT<br/>TTCAGTCCGATCCGGAAAAGTCCAGGAAAGAAATAAATCGTTTGGTA<br/>GAAGAAGGCACGAATGAAAAAATTAAGACATGCTTGTACCAGGAT<br/>CGATCTCTTCAGATTCCAGACTCGTTTGGCCAAATGCTATTTATTTA<br/>TGGGGAAATGGCAAAC TAGATTTAAGCGATATGAAACAAGAAAAGT<br/>TCCCTTCTATACAATTAATGAAGAGAACTCTATGGTAGATATGATGT<br/>TTAAAATGGAGTCTTATAAATATATCCATAGTAAGGATTTAAATGCA<br/>GACATAATCGAAGTACCATATCTAGGAGAAAACAGTTAGTTTGATCAT<br/>ATTACTTCCATTGAAAAGATTGGTCTCCCTCTCTTGA AAAAGAAAT<br/>TTCTGTACAGAAGTTGAACCACGCAGTTGGGCAATGCAGATGGAA<br/>AACTATGTAGAACTTGGACTTCCAAGATT TAACTGGAGGAGAAAAAT<br/>CTCTCTCGAAGAACATCTACAGAATATGGGAATGACAGAAGCATTC<br/>TTAAAGGAGCAGCTAACTTTTCAGGGATTCTGGTGAAGGAAACCTA<br/>TGTCTCTATCCGCTATCCATAAAACATTCCTTGATATCAACGAAGA<br/>GGGCACAGAAGCAGCTGCAGCCACTGCATTAGAAATTACGCTGTATT<br/>GTTTACCTCCACCTCCTCGTTTTCACTTTACCGTGGATCACCCTTTCAT<br/>GATGTTGATCCGCGAATCAACTACTGGACTAATCCTATTTCTTGGAA<br/>GTGTTAACAAC TTATAG</p>                                                                                             |

|             |            |         |         |    |             |                                                                                                                                                                                                                                                                                                                                                                                                                                                                                        |                                                                                                                                                                                                                                                                                                                                                                                                                                                                                                                                                                                                                                                                                                                                                                                                                                                                                                                                                                                                                                                                                                                                                                                                                                                                                                                                                                                                                       |
|-------------|------------|---------|---------|----|-------------|----------------------------------------------------------------------------------------------------------------------------------------------------------------------------------------------------------------------------------------------------------------------------------------------------------------------------------------------------------------------------------------------------------------------------------------------------------------------------------------|-----------------------------------------------------------------------------------------------------------------------------------------------------------------------------------------------------------------------------------------------------------------------------------------------------------------------------------------------------------------------------------------------------------------------------------------------------------------------------------------------------------------------------------------------------------------------------------------------------------------------------------------------------------------------------------------------------------------------------------------------------------------------------------------------------------------------------------------------------------------------------------------------------------------------------------------------------------------------------------------------------------------------------------------------------------------------------------------------------------------------------------------------------------------------------------------------------------------------------------------------------------------------------------------------------------------------------------------------------------------------------------------------------------------------|
| TatPlnSrp12 | JAT91131.1 | 4 e-140 | PF00079 | -- | Serpin-like | <p>MKEKMIALMVLFLGGLLTSQASSELKNLGKANNDFSIKI<br/> YKSLPSTGNAFFCPASVFTALGMLFKGAGGNTAEEMRE<br/> ALSYKTAGLTDETVHQKFQDVMELFGNPSNEYALEIAN<br/> AIVTSDGFEISEEYKEALKTFYKAITKKVVSFKGAEKAAA<br/> LNEINGWVSEKTHGKIAKLLEDLDEDTVMVLLNAVYFK<br/> GTWESEFNANLTKDDVFYANGKDPKTVRMMNKRNFLL<br/> YNEFDKDNFKALKLPYKGEHLSMVILLPNERDGLKQLE<br/> ESLTLQKLTEVMSSSLGDRERKVKVSIPKFKLEDNRKLV<br/> NLKQLGMKDAFKGGAADFTGIDKSGRLVVSDEVVHKAV<br/> IDVNEEGTEAAGATAVIGIVRSSRPLRQLEFKADHPFLFF<br/> IHDQRTEMILFMGRVNEL</p> | <p>ATGAAAGAAAAGATGATTGCTTTAATGGTGTTATTTCTCGGTGGTCT<br/> CCTTACAAGTCAAGCATCCTCTGAGTTAAAGAACTTAGGAAAAGCGA<br/> ATAATGACTTCTCTATAAAGATATACAAATCATTACCATCAACAGGA<br/> AATGCCTTCTTTTGTCCAGCTAGCGTCTTTACCGCTCTGGGAATGCTG<br/> TTTAAAGGAGCAGGAGGAAATACCGCTGAAGAAATGCGGAGAAGCGT<br/> TATCCTACAAGACAGCTGGATTAACCTGACGAAACGGTACATCAGAA<br/> ATTCAAAGATGTCATGGAATTATTTGGAACCCCTTCTAACGAGTACG<br/> CACTAGAAAATTGCAAAATGCTATAGTGACGCTCTGATGGATTGAGATA<br/> TCCGAGGAGATAAAGGAAGCATTGAAAACGTTCTACAAGGCAATAA<br/> CAAAAAAGGTTAGTTTTAAAGGGGCTGAGAAGGCGGCTGCCCTTAAT<br/> GAAATCAATGGCTGGGTTAGTGAGAAAACCTATGGAAAAATTGCCA<br/> AACTTTTAGAAGATTAGATGAGGATACCGTGATGGTACTGCTGAAT<br/> GCTGTTTACTTTAAAGGAACATGGGAATCTGAATTCATGCAAAATCT<br/> TACAAAAGATGATGTATTTATGCTAATGGAAAAAGATCCCAAAACGG<br/> TACGAATGATGAACAAACGAAATTTTTCTTGACAAATGAATTTGAT<br/> AAAGACAATTTCAAAGCACTTAACTGCCTTATAAAGGGGAACATCT<br/> GAGTATGGTAATACTTCTGCCAAACGAAAGAGATGGATTGAAGCAA<br/> TTAGAAGAATCTCTGACATTACAGAAGCTTACCGAGGTCATGTCTAG<br/> TTTAGCGCACCGTGAAACGAAAAGTAAAAGTGTCCATTCCCAATTTA<br/> AACTTGAGGACAGCAGGAAGTTAGTGGAAAACCTTGAAGCAGCTGGG<br/> TATGAAAAGATGCGTTTAAAGGTGGAGCAGCAGATTTTACTGGCAATG<br/> ACAAAAGTGGACGATTAGTTGTTTCGGATGTTGTACACAAAGCTGTG<br/> ATAGATGTTAACGAAGAAGGAAGTGAAGCTGCAGGTGCTACAGCTG<br/> TTATTGGCATTGTGCGATCCAGCAGACCTCTTCGTCAACTTGAATTTA<br/> AGGCTGATCATCCGTTCTTATTTTTATTTCATGACCAGAGAACAGAA<br/> ATGATTCTTTTTATGGGACGAGTTAATGAACATAA</p> |
| TatPlnSrp13 | JAT91131.1 | 8 e-121 | PF00079 | -- | Serpin-like | <p>MLSKGAGGNTAEEMREVLSTYKTAELTDETIHQQFKDLL<br/> QLIEKSSNEYVLEIANAIHTSDEYAISEYKALKTFYSA<br/> MSKEVNFKGSEKAAALAEINGWVSEKTHGKIAKLLEDL<br/> DEDTVMVLLNAIYFKGMWVSEFNANRTKDDVFYANGK<br/> DPKTVRMMNKRNFLLYNEFDKDNFKALKLPYKGEHLS<br/> MVILLPNERDGLKQLEESLTLQKLTEVMSSSLGDRERKV<br/> KVSIPKFKLEDNRKLVENLKQLGMKDAFKGGAADFTGI<br/> DKSGRLVVSDEVVHKAVIDVNEEGTEAAGATAVIGIVRS<br/> SRPLRQLEFKADHPFLFFIHDQRTEMILFMGRVNEL</p>                                                                           | <p>ATGCTGTCTAAAGGTGCAGGAGGAAATACTGCTGAAGAAATGCGAG<br/> AAGTTTTATCCTACAAGACAGCTGAATTAAGTGACGAAACAATACAT<br/> CAACAATTCAAAGATCTCCTCCAAGTATCGAAAAATCTTCTAACGA<br/> ATATGTCCTGGAAATTGCAAAATGCCATAATAACATCTGATGAATATG<br/> CAATATCCGAAGAGTACAAGGGAGCACTGAAAACCTTTTACAGCGC<br/> AATGAGTAAAGAAGTTAATTTTAAAGGAAGTGAAGAAAGCTGCTGCC<br/> CTTGCAAGAAATCAATGGCTGGGTTAGTGAGAAAACTCATGAAAAA<br/> TTGCCAAACTTTTAGAAGATTTAGATGAGGATACCGTGATGGTATTG<br/> CTGAATGCTATTTACTTTAAAGGAATGTGGAAATCGGAATTCATGC<br/> AAATCGTACAAAAGATGATGTATTTATGCTAATGGAAGATCCCA<br/> AAACGGTACGAATGATGAACAAACGAAATTTTTCTTGTAACATGAA<br/> TTTGATAAAGACAATTTCAAAGCACTTAACTGCCTTATAAAGGGGA<br/> ACATCTGAGTATGGTAATACTTCTGCCAAACGAAAGAGATGGATTGA<br/> AGCAATTAGAAGAATCTCTGACATTACAGAAGCTTACCGAGGTCATG<br/> TCTAGTTTAGGCGACCGTGAAACGAAAAGTAAAAGTGTCCATTCCCAA<br/> ATTTAAACTTGAGGACAGCAGGAAGTTAGTGGAAGAACTTGAAGCAG<br/> CTGGGTATGAAAGATGCGTTTAAAGGTGGAGCAGCAGATTTTACTGG<br/> CATTGACAAAAGTGGACGATTAGTTGTTTCGGATGTTGTACACAAAG<br/> CTGTAATAGATGTTAACGAAGAAGGAAGTGAAGCTGCAGGTGCTAC<br/> AGCTGTTATTGGCATTGTGCGATCCAGCAGACCTCTTCGTCAACTTGA<br/> ATTTAAGGCTGATCATCCGTTCTTATTTTTATTTCATGACCAGAGAAC<br/> AGAAATGATTCTTTTTATGGGACGAGTTAATGAACATAA</p>                                                                                                                                                                                                                      |

|             |                |         |         |    |             |                                                                                                                                                                                                                                                                                                                                                                                                                                                                                                                                                                                                                                                                                                                                                                                                                                                                                                                                                                                                                                                                                                                                                                                                                                                                                                                                                                                                                                                                                                                                                                                                                                                                                                                                                                                                                                                                                                                                                                  |
|-------------|----------------|---------|---------|----|-------------|------------------------------------------------------------------------------------------------------------------------------------------------------------------------------------------------------------------------------------------------------------------------------------------------------------------------------------------------------------------------------------------------------------------------------------------------------------------------------------------------------------------------------------------------------------------------------------------------------------------------------------------------------------------------------------------------------------------------------------------------------------------------------------------------------------------------------------------------------------------------------------------------------------------------------------------------------------------------------------------------------------------------------------------------------------------------------------------------------------------------------------------------------------------------------------------------------------------------------------------------------------------------------------------------------------------------------------------------------------------------------------------------------------------------------------------------------------------------------------------------------------------------------------------------------------------------------------------------------------------------------------------------------------------------------------------------------------------------------------------------------------------------------------------------------------------------------------------------------------------------------------------------------------------------------------------------------------------|
| TatPinSrp14 | XP_005307140.1 | 1 e-101 | PF00079 | -- | Serpin-like | <p>MFSCYRLRSSRTNCSCWFNLLGVVTLNVLATSMATSP<br/>KNLLSKAFSEFAVKLYRSVSEQQDNVLVSPISISTVLSMV<br/>LVGAKGSTSDQMKKVLSIDSIEETIPGFSDLISHLNSGNIS<br/>DKMSIGNRVFLEEGLPIVNDFTFLMKDVFKAIEYGVKVSFS<br/>TQPLAAKEAINSWVSAITNEKIKELITDDIDPLTKLVLS<br/>AIYFKGFWAEQFLKDSIEIAPFHLNSKQSIEMMYQKK<br/>KFGFAYDSELKVKIIDLPIEQLAVSMIILPDEYEGLSIE<br/>RQLDSKLNKLLLEVRKHQTKLDVFLPKFKEESLSLKP<br/>ILSAMGMVDMFCSKADLSGIVEGKDLYESVIHKACI<br/>DVNEEGTEAAAAATAVRIMARSIHIIEFRADHPFLFLIVE<br/>NSHNILFFGALKTPKAVESRDHEEL</p> <p>ATGTTTTTCATGTTATCGATTACGGTCTTCGAGGACAAAATTGTAGTTGC<br/>TGGTTTAAATTGTTGTTAGGCGTAGTTACTCTCAACGTTTTAGCTACT<br/>AGTATGGCTACATCACCCAAAAATCTACTATCCAAGGCATTTTCAGA<br/>GTTTGCAGTGAAACTGTACAGATCAGTTTCTGAACAACAAGACAATG<br/>TTTTAGTATCCCCATAAGTATTTCTACTGTGTTGAGCATGGTTTTGG<br/>TAGGAGCAAAAAGGAAGTACTTCAGACCAGATGAAGAAAGTGCTCAG<br/>CATTGATAGCATTGAAGAAACAATACCTGGTTTTTCTGATTTAATCTC<br/>TCACCTTAAATTTCTGGCAACATTTCTGACAAAATGAGCATTGGAAATA<br/>GGGTGTTTTTTGGAGGAAGGACTGCCAATTGTAAATGATTTTACATTT<br/>CTGATGAAAGATGTATTTAAAGCTGAATATGGGAAAGTCAGCTTTTC<br/>CACTCAGCCATIGGGCTGTAAAGAAGCTATCAATTTCTIGGGTTTCAG<br/>CAATCACAAATGAAAAGATAAAAAGAAATTAATCACTGATGACATCGA<br/>TCCATTGACAAAACITGTGCTTGTGCTGAGTCAATTTACTTTAAAGGCTT<br/>TTGGGCAGAACAGTTTTGAAGGATTCAACCGAGATTGCTCCATTCC<br/>ATTTAAACTCCAAACAATCTATTAATATTGAAATGATGTATCAGAAAG<br/>AAAAAATTTGGATTTGCCTATGATAGTGAATTGAAAGTTAAGATTAT<br/>TGATTTGCCTTATGAACAACCTTGCCGTTAGCATGATTATTATATTGCC<br/>CGATGAGTATGAAGGACTGAGTACTATTGAGCGGCAGCTTGATTTCAG<br/>ATAAGCTAAATAAGCTTCTTCTTGAAGTTAGAAAGCATCAGACTAAG<br/>TTAGATGTTTTCTTGCCAAAATTTAAATTGGAGGAATCATTGAGCCTA<br/>AAGCCCATTTCTTCTGCAATGGGTATGGTGGATATGTTCTGTTTCAGAC<br/>AAAGCAGACTTATCTGGTATGTAGAAGGTAAAGATTGTATGTTGA<br/>ATCAGTAATTCACAAAGCATGTATCGATGTAAATGAGGAAGGCAGTG<br/>AGGCTGCTGCAGCTACTGCCGTTCTGATATTATGGCAAGAAGCATTCAT<br/>ATTATACCAGAGTTTCGTGCTGATCATCCATTCTCTATTTCATTATTGT<br/>GAAAAATTCACATAATTTGATTCTTTTCTTTGGTGCTTTGAAAACCCCA<br/>AAAGCTGTTGAGAGCAGAGATCATGAAGAATTATAA</p> |
| TatPinSrp15 | XP_013779833.1 | 6 e-116 | PF00079 | -- | Serpin-like | <p>MQKILLVLICSFAAA VSSCIPENGTTNVTNIQNNLLSFQY<br/>GSIDFALDMFRGLYNDTVNLFFSPLSVWVTLVTIYTGSR<br/>HQTAKELSSVLGITDIDLTPETLSAFIEICSGCKQDNK<br/>STVKIANRIYFQEDLELKL CGREVEKMFHKIDFKTNPEG<br/>ARDTINDFIKNETNGKILELIPPLSVSPLTQMVIANAVYF<br/>KGIWRNKFNKTMTPLRFYPDRETTTLTVDMMNTIGTYI<br/>YGVSDQMDQCQALEIPYEGGSINMLILLPRHSFRGLDILAS<br/>TITPERLENLLNSMASQDVLITLPKFKEQQYELSKTLRK<br/>LGLRNLDFPRFSDLSGFTGIRGLSIDAIHHKSYIKVNEEG<br/>TEAAGATGSLLSRDSHPLGVTRFYANRPFVYFIRDYSD<br/>ELLFMGTIRVPQYNKQQ</p> <p>ATGCAGAAGATATTATTGGTATTAATCTGTAGTTTTGCTGCTGCCGTT<br/>TCAAGCTGCATACCAGAAAAATGGTACAACAAATGTACCAATATTCA<br/>AAACAATTTACTTTCTTCCAGTATGGCAGCATAGATTTTCGCCCTGGA<br/>TATGTTTCGTGGTCTTTATAATGATACCGTAAACTTATTTTTAGCCC<br/>GCTTAGTGTGTGGGTAACCTCTGTTACCATTTATACAGGCTCAAGAC<br/>ATCAAAACGGCCAAAGAACTTTCCAGTGTTTTAGGGATAAAGTACT<br/>GATCTAACATTGCTGCCCGAAACACTAAGTGCCCTTTATAGAAATCTG<br/>CAGTGGCTGCAAAACAGGATAATAAATCAACTGTTAAATAGCAAAAT<br/>AGAATTTACTTTTCAGGAAGATCTTGAATTAATACTCTGCGGAAGGGA<br/>AGTGGAGAAAAATGTTTCATAAAATTGACTTCAAACTAATCCCGAAG<br/>GAGCGAGGGACACTATTAATGATTTTCATAAAAAATGAAACAAATGG<br/>AAAAATATTGGAATTAATCCCTCCTCTGTCTGTTAGCCCTCTAACTCA<br/>AATGGTAATTGCTAATGCAGTTTATTTTAAAGGAATTGGCGGAATA<br/>AATTCAACAAAAACAATGACTCGTCCACTTCGTTTCTATCCAGATCGT<br/>GAAACCACTTTAACGGTGGACATGATGAATACAATAGGAACGTATAT<br/>TTATGGAGTTAGCGACCAAAATGGATTGCCAAGCTCTAGAGATTCCCT<br/>ACGAAGGTGGAAGCATAAACATGCTGATATTATTACCAGACATTCC<br/>TTCCGAGGATTGGACATCCCTCGCAAGTACGATTACTCCAGAACGTCT<br/>AGAGAACCTCCTCAACTCTATGGCTTCCCAAGACGTTTTAATTACTCT<br/>ACCCAAATTTAAAGTTGAACAACAGTATGAACTATCAAAGACTCTCC<br/>GGAAACTTGGATTGCGTAATCTGTTGATCTCTGTTTTTCCGATCTCT<br/>CAGGCTTCACAGGAATTAGAGGCTTAAGCATAGATGCCATACATCAT<br/>AAATCTTACATTAAAGTCAATGAAGAAGGAACAGAAGCTGCTGGAG<br/>CAACGGGTTCCCTGTTGTCCAGGGATTCTCATCCACTGGGAGTTACA<br/>CGATTTTATGCAAAATAGACCTTTCTGTACTTTATTCGTGACACTTAT<br/>TCTGACGAACTACTCTTTATGGGCACAATAAGGGTTCCTCAATATAA<br/>TAAACAGCAATAA</p>                                          |

|             |            |         |         |    |             |                                                                                                                                                                                                                                                                                                                                                                                                                                                                                        |                                                                                                                                                                                                                                                                                                                                                                                                                                                                                                                                                                                                                                                                                                                                                                                                                                                                                                                                                                                                                                                                                                                                                                                                                                                                                                                                                                                                               |
|-------------|------------|---------|---------|----|-------------|----------------------------------------------------------------------------------------------------------------------------------------------------------------------------------------------------------------------------------------------------------------------------------------------------------------------------------------------------------------------------------------------------------------------------------------------------------------------------------------|---------------------------------------------------------------------------------------------------------------------------------------------------------------------------------------------------------------------------------------------------------------------------------------------------------------------------------------------------------------------------------------------------------------------------------------------------------------------------------------------------------------------------------------------------------------------------------------------------------------------------------------------------------------------------------------------------------------------------------------------------------------------------------------------------------------------------------------------------------------------------------------------------------------------------------------------------------------------------------------------------------------------------------------------------------------------------------------------------------------------------------------------------------------------------------------------------------------------------------------------------------------------------------------------------------------------------------------------------------------------------------------------------------------|
| TatPInSrp16 | JAT91131.1 | 5 e-133 | PF00079 | -- | Serpin-like | <p>MIPLTSAFLLALVVTQASSEYDDIKNLALANNELAFKL<br/> HKTFNLQGNAFTSPASIFTALAMLYQGARGVTAEMRE<br/> VLSFSVAGLTDNRINQHFQELLSLLGRSSGEYKLNIA<br/> LSQSRSPVLKKNYKDVLEKYYHAKLKEVDFARENAKAV<br/> EEVNNWVSDKTNNKITNLLDAIPSDTVLLLLNAVYFKG<br/> TWKTQFSPRTTREAPFYNDGINEVSVQMMGAKNKFYF<br/> DFNDYGVQAVKLPYNGEDMSMVLLPYKRDGLQKVE<br/> QQLNPNKLLDDIISKMELETIVIVNIPKFKLEDKKEKLNLT<br/> NLGMRSAFVNGANFAGITNEGNLKVSEIVHKAVVEVNE<br/> EGSEAAGASAVLIVPYSSGNVVQYFGANHPFIFFIRDDRT<br/> GMILFYGRVNNL</p>             | <p>ATGATTCCTTTAACATCAGCATTCTCTTAGCTCTGGTTGTTACCCAA<br/> CAAGCCTCCTCAGAATACGATGACATTAAGAATCTAGCATTGGCCAA<br/> TAACGAACTAGCTTTCAAACCTGCACAAAACATTTAATTTGCAAGGAA<br/> ATGCCITTTACCTCACCGGCAAGTATCTTCACTGCTCTGGCTATGCTCT<br/> ATCAAGGTGCAAGAGGTGTTACAGCTGAGGAGATGCGTGAAGTATT<br/> GTCTTTTCAGTGTTGCCGGTTTGACTGACAGAAACATCAACCAACATT<br/> TCCAAGAATTACTTTCCCTTCTGGGGAGATCTTCTGGAGAATACAAA<br/> CTTAATATTGCCAATGCTATTTTGTGCGAGTCTAGGAGTCCAGTACTG<br/> AAGAATTACAAAGATGTCCTGGAGAAAGTACTACCATGCCAAGTTGA<br/> AAGAAGTTGATTTTGCAAGAGAGAAACGCAAAAGGCTGTTGAAGAAGT<br/> TAATAACTGGGTTAGTGATAAAACAAACAACAAATCACCATTGTTG<br/> TGGATGCAATACCTTCCGATACAGTTTTGTTACTGCTGAATGCTGTTT<br/> ATTTCAAAGGTACATGGAAAACTCAGTTCTCTCCACGTACCACTAGA<br/> GAGGCACCATTTCTACAATGATGGCATCAATGAAGTTTCAGTTCAAAT<br/> GATGGGAGCAAAAGAATAAGTTCTTTTATGGTGATTTCAATGACTATG<br/> GTGTCCAGGCTGTGAAACTGCCATACAATGGTGAAGATATGAGCATG<br/> GTAGTACTTCTACCATATAAAAGAGATGGTTTACAAAAAGTAGAACA<br/> ACAGCTCAATCCAAATAAATTAGAGCAGATTATTTCCAAATGGAGT<br/> TGGAAACCGTTATCGTCAACATACCTAAGTTTAAATTGGAAGATAAG<br/> AAGGAATTAACCTTAATCTAACCAATTTAGGAATGAGAAGTGCTTT<br/> TGTTAATGGAGCAAAATTCGCCGGTATTACAAATGAAGGAAACCTTA<br/> AAGTATCAGAAATTTGTTCAAAAGCTGTGGTTGAAGTAAATGAGGA<br/> AGGAAGTGAAGCAGCTGGTGCAAGTGCTGTTTTAATAGTACCATATT<br/> CCTCAGGGAAATGTTGTACAATACTTTGGAGCCAACCATCCTTTTATCT<br/> TCTTCATCAGAGACGATAGGACTGGAATGATACTTTTCTATGGAAGA<br/> GTCAATAATTTGTAA</p>     |
| TatPInSrp17 | JAT91131.1 | 7 e-139 | PF00079 | -- | Serpin-like | <p>MIGKMIVLMVMFLAGLLTSQASTDLKNLAKANNDFCIK<br/> IYKSLPSTGNAFFCPASVFTALGMLFKGAGGNTAEEMRE<br/> ALSYKTAGLTDENVHQKFKDVMELFGNPSNEYALEIAN<br/> AIVTSDGFEISEEYKEALKTFYKAITKKVSVFKGAEKAAA<br/> LNEINGWVSEKTHGKIAKLLEDLDEDTVMVLLNAVYFK<br/> GTWESEFNANLTKDDVFYANGKDPKTVRMMNKRNFLL<br/> YNEFDKDNFKALKLPYKGEHLSMVILLPNERDGLKQLE<br/> ESLTLQKLTEVMSSLGDRERKVKVSIPKFKLEDSRKLVE<br/> NLKQLGMKDAFKGGAADFTGIDKSGRLFVSDIVHKAIIIE<br/> INEEGAEAAGVTGVVIVPLSARPPQQLKFNADHPFLFFIQ<br/> DDRTNMILFMGRVNDI</p> | <p>ATGATAGGCAAGATGATTGTTTTAATGGTGATGTTTCTTGCTGGTCTT<br/> CTAACAAAGTCAAGCTTCTACAGATTTAAAGAATTTAGCAAAAAGCGAA<br/> TAACGACTTCTGTATAAAGATATACAAATCATTACCATCAACAGGAA<br/> ATGCCITCTTTTGTCAGCTAGCGTCTTTACCGCTCTGGGAATGCTGT<br/> TTAAAGGAGCAGGAGGAAATACCGCTGAAGAAATGCGAGAAGCGTT<br/> ATCCTACAAGACAGCTGGATTAACTGACGAAACGGTACATCAGAAA<br/> TTCAAAGATGTCATGGAATTAATTTGGAACCCCTTCTAACGAGTACGC<br/> ACTAGAAAATTGCAAATGCTATAGTGACGCTGATGGATTTCGAGATAT<br/> CCGAGGAGTATAAGGAAGCATTGAAAACGTTCTACAAGGCAATAAC<br/> AAAAAAGGTTAGTTTTAAAGGGGCTGAGAAGGCGGCTGCCCTTAAT<br/> GAAATCAATGGCTGGGTTAGTGAGAAAACTCATGGAAAAATTGCCA<br/> AACTTTTAGAAGATTAGATGAGGATACCGTGATGGTACTGCTGAAT<br/> GCTGTTTACTTTAAAGGAACATGGGAATCTGAATTCATGCAATCT<br/> TACAAAAGATGATGTATTTTATGCTAATGGAAAAAGATCCCAAAACGG<br/> TACGAATGATGAACAAACGAAATTTTTCTTGTACATGAATTTGAT<br/> AAAGACAATTTCAAAGCACTTAACTGCCTTATAAAGGGGAACATCT<br/> GAGTATGGTAATACTTCTGCCAAACGAAAGAGATGGATTGAAGCAA<br/> TTAGAAGAATCTCTGACATTACAGAAGCTTACCGAGGTCATGTCTAG<br/> TTTAGCGACCGTGAACGAAAAAGTAAAAGTGTCCATTCCCAATTTA<br/> AACTTGAGGACAGCAGGAAGTTAGTGGAATACTTGAAGCAGCTGGG<br/> TATGAAAAGATGCGTTTAAAGGTGGAGCAGCAGATTTTACTGGCATTG<br/> ACAAAAGTGGACGCCTATTTGTTTCGGACATTGTACACAAAGCTATA<br/> ATAGAAATTAATGAGGAGGAGCAGAAAGCAGCAGGTGTGACAGGTG<br/> TTGTTATTGTTCTTTATCCGCAAGACCTCCTCAACAGTTGAAGTTCA<br/> ATGCTGACCATCCTTCTTATTTTCATTGAGGATGACAGAACAAATA<br/> TGATTCTTTTATGGGTAGAGTTAATGACATATAA</p> |

|             |                |         |         |    |                  |                                                                                                                                                                                                                                                                                                                                                                                                                                                                                              |                                                                                                                                                                                                                                                                                                                                                                                                                                                                                                                                                                                                                                                                                                                                                                                                                                                                                                                                                                                                                                                                                                                                                                                                                                                                                                                                                                                                                                         |
|-------------|----------------|---------|---------|----|------------------|----------------------------------------------------------------------------------------------------------------------------------------------------------------------------------------------------------------------------------------------------------------------------------------------------------------------------------------------------------------------------------------------------------------------------------------------------------------------------------------------|-----------------------------------------------------------------------------------------------------------------------------------------------------------------------------------------------------------------------------------------------------------------------------------------------------------------------------------------------------------------------------------------------------------------------------------------------------------------------------------------------------------------------------------------------------------------------------------------------------------------------------------------------------------------------------------------------------------------------------------------------------------------------------------------------------------------------------------------------------------------------------------------------------------------------------------------------------------------------------------------------------------------------------------------------------------------------------------------------------------------------------------------------------------------------------------------------------------------------------------------------------------------------------------------------------------------------------------------------------------------------------------------------------------------------------------------|
| TatPInSrp18 | XP_013786963.1 | 9 e-144 | PF00079 | -- | Serpin like      | <p> MYPVVISVFFYISAFLYLQGNAETVNSPFNHLVEANLDF<br/> SSDLYNEISKRRKGYQDNIMFSPFLYTVLLMTELGSRGQ<br/> TAQELCQLLHLCRVNISIYIHDA YGRIVTDLLTDSIRQSL<br/> SIANRLYVQKGLEISKFYDYALRYYYNTTIRQVDFQNN<br/> AQVREEINNWWVHGQTSGRILHFLSRPPSQATKMMTINAL<br/> YFDSDWLWKFDPA MTEPKARFYVTPHFHAVVPMVMVG<br/> KLNLAIGHCSSLDASILELPFKSNRISMFLVLPDQLEGLGI<br/> LQKQLNSTTMKQLISTMKKGEVNVRI PRFYVESQPLITE<br/> LLRNLGVHHLFSPSANLKGITSSDIYIGDMIHWAVINLD<br/> ERGSMAVSATATVVERIGTFNGQYFEADHPFLFFIMDKQ<br/> TGLVLFMGRIAGP </p> | <p> ATGTATCCTGTGGTCATTTCAGTGT TTTTCTACATATCAGCCTTTTGT<br/> ACCTCCAAGGCAATGCCGAGACAGTGAAC TACACCTTTTAACCATTTA<br/> GTAGAAGCTAATTTAGACTTCAGTTCTGATTGTACAATGAAATATC<br/> GAAGCGCAAAGGTTATCAAGACAACATCATGTTTTCCTCTTTGGTTT<br/> ATACACGGTACTACTAATGACAGAATTAGGCTCGAGAGGGCAGACC<br/> GCACAAGAACTCTGTCAGTTACTCCACTTGTGTCGGGTTAATATTTCG<br/> TACATTCACGACGCTTATGGTCGTATAGTGACAGATTACTACCGGA<br/> CGCATCAATTTCGTCAATCATTATCAATAGCCAACCGTTTGTACGTTCA<br/> GAAGGGGTTAGAAATATCGAAATTTTACGACTACGCACTACCGTATT<br/> ACTACAACACAACAATACGACAAGTAGATTTCAAAAATAACAGTGC<br/> GCAAGTACGAGAGGAGATAAAATAACTGGGTTACCGGACAAACTTCT<br/> TCTGAAAGGATTCTACATTTTCTTCTCGTCTCCATCGCAGGCTACTAAA<br/> ATGATGACTATTAATGCAC TTTATTTTCGATTACAGATTGGTTGTGGAAG<br/> TTTGATCCAGCTATGACTGAACCGAAAGCTCGCTTTTACGTCACCCCC<br/> ACACTTCCATGCGGTAGTTCCCAATGATGGTAGGTAAGCTGAACCTCG<br/> CTATTGGACATTGCTCGTCTGCTAGATGCAAGTATTTTAGAATTACCTT<br/> TCAAACTCGAACC GAATCAGTATGTTTCTAGTTTACCCGATCAACTA<br/> GAAGGACTCGGTATTCTACAGAAACAGTAAACTCAACGACGATGA<br/> AACAACTCATATCAACTATGAAGAAAGGTGAAGTGAATGTGCGAAT<br/> TCCCAGATTTTATGTGCAATCTCAACCGCTAATCACC GAAC TTTCTACG<br/> GAATCTCGGTGTACATCATCTATTCTCTCATCTGCTAATCTAAAAGG<br/> AATAACAACATCCAGTGACATTTATATCGGCGATATGATCCATTGGG<br/> CGGTGATTAATTTAGACGAAAGAGGCAGCATGGCCGATCTGCAACA<br/> GCAACCGTAGTTGAACGGATAGGAAC TTTCAATGGACAATATTTTCA<br/> AGCTGATCATCTTTCTTATTCTTTATAATGGACAACAAACCGGATT<br/> AGTGCTGTTTATGGGAAGGATAGCTGGTCTCTTAA </p> |
| TatPInSrp19 | JAT91123.1     | 4 e-45  | PF00079 | -- | Serpin-like      | <p> MVISLILTMLLILDVTRQGSSEFDNIKKIALANNEFTFKLS<br/> GAFDSQENVIIISPANIFIALAMLYQGARGITAEELRELLSF<br/> NATGLSDEDMNQFLELLTFLGNSSDDYNLYIANAVVS<br/> QYQYPVLKEYKDVLYKYD ATLKESNISEDHTKAVEEVN<br/> DWVKNKTMGRIQYLSKSILNDTALVLLNTAYFKGTWK </p>                                                                                                                                                                                                                                                        | <p> ATGGTGATATCATTGATCCTAACAAATGTTATTGATTCTGGATGTTACC<br/> AGACAAGGATCCTCCGAATTTGATAACATTAAGAAAAATTGCATAGC<br/> TAATAACGAATTTACTTTCAAATTAAGTGGGGCATTGATTCTCAGG<br/> AAAATGTCATAATTTACCAGCGAATATTTTCATTGCTCTGGCAATGC<br/> TGTATCAAGGTGCAAGAGGTATTACTGCCGAGGAATCGGTGAATTG<br/> TTGTCTTTCAATGTACTG GATTGAGTGACGAAGACATGAATCAGCA<br/> ATTTCTAGAATTGCTCACTTTCTTGGGAAACAGCTCTGATGATTACAA<br/> TCTGTATATTGCTAACGCTGTTGTATACAAATACAGATCCGGTACT<br/> AAAGGAATACAAAGATGTACTGAAAGTACTACGATGCTACATTGAAA<br/> GAATCTAATATTTCCGAAGACCATACAAAGGCAGTCGAAGAGGTAA<br/> ACGATTGGGTCAAGAAATAAAACAATGGGTAGGATCCAGTACTTGTCA<br/> AAATCAATACTTAATGATACAGCTTAGTATTGTTGAATACAGCTTAT<br/> TTCAAAGGTACATGGAAA </p>                                                                                                                                                                                                                                                                                                                                                                                                                                                                                                                                                                                                                                                                                                                                                 |
| TatPInKun01 | XP_008472165.1 | 2 e-18  | PF00014 | -- | Kunitz-type like | <p> SFKISVLPKPYCRMLFSISVVSFVLVFLHPNGWTKEMDQ<br/> CSLQPEGGNCRGIFQKFYYNETTGSCFPFFYGGCGGNEN<br/> RFETEEDCMKTKCAEEIEIRIFRILPKQRKGIEKVTEKPQ </p>                                                                                                                                                                                                                                                                                                                                                  | <p> TCGTTTAAAAATTTCCGTTCTCCCTAAGCCTTACTGCGAATGCTATTCT<br/> TCAATTTCTGTTGTTTCTCTTTGTTGTTTGTGTTTGCACCCCTAACGGAT<br/> GGACTAAAGAGATGGACCAATGTTCTCTTCAACCAGAGGGGAGGCAA<br/> TTGCAGAGGGATTTTCCAGAAATTTTATTACAACGAAACGACAGGTAG<br/> GCTGCTTCCCTTTTCTACGGTGGATGTGGTGGAAACGAAAAATCGC<br/> TTTGAAACAGAGAAGAAGATTGCATGAAAACCTGCAAAAGCAGAGAAGAA<br/> TTGAAATTAGGATTTTCCGAATTTCTTCCAAAGCAAAGAAAAGGAATT<br/> GAAAAGGTTACAGAGAAACCTCAG </p>                                                                                                                                                                                                                                                                                                                                                                                                                                                                                                                                                                                                                                                                                                                                                                                                                                                                                                                                                                                                           |
| TatPInKun02 | XP_015905520.1 | 1 e-109 | PF00014 | -- | Kunitz-type like | <p> VTQWSEWSPCTVTGKGMIKIRTRLYFDSSSLDTCNVELI<br/> QKMLCMADRTDCSIDPAEAEKICMQPKETGACRGYFPR<br/> WHYDL SRREC VQFIYGGCRGNRN NFERYSDCSQMCSMI<br/> FKGPPSTIATLAASPIQVPNITEAPPVNCMVTPWSPWTAC<br/> SRSCGNRGRKERRRMIKVAPLNGGKPCPRRLTQRRKCKD<br/> LPACSVDCMVTWPWGEWSTCSTTCGQSSTQQRTEIKRP<br/> AKHGGIPCGPRVERRFCTIPLCTY </p>                                                                                                                                                                             | <p> GTTACACAGTGGTCTGAGTGGTCAACCATGCACAGTTACTTGTGGTAA<br/> GGGGATGAAAAATCCGTACCCGCTGTACTTTGATTCATCCTCTCTAG<br/> ATACATGTAATGTGGA ACTAATACAGAAAATGCTTTGTATGGCTGAT<br/> AGAACCGATTGCAGTATCGACCCAGCCGAAGCCAAAAGAAATCTGTA<br/> TGCAGCCTAAGGAAACAGGAGCTTGCAAGGATATTTTCCAAGGTG<br/> GCACTACGATTATCCAGAAGAGGATGCGTTCAATTTATATACGGAG<br/> GATGCCGAGGGAACAGAAATAATTTTGAACGCTATTCAGACTGTAGT<br/> CAGATGTGCTCGATGATATTTAAAGGTCACCTAGCCTATAGCTAC<br/> CTTAGCTGCATCCCCCTATACAAGTCCCCAACATTACAGAAAGCCCCAC<br/> CTGTTAATTGTATGGTTACACCTTGGTCACCATGGACAGCATGTTCTC<br/> GTCTCTGTGGTAATGGCCGTAAAGAAAGAGAAGAAATGATCAAAAGT<br/> TGCACCTCTTAATGGCGGGAACCATGTCCCGTAGGCTAACCCAGA<br/> GAAGGAAGTGTAAAGATTTACCTGCCTGCTCTGTTGATTGTATGGTT<br/> ACCCCATGGGGAGAATGGTCAACATGTTCAACAACGTGCGGTCAAA<br/> GTAGTACTCAACAAAGAACAAAGGGAATTAACGTCCAGCCAAGCA<br/> TGGTGGTATACCTTGTGGACCAAGAGTGAACGTAGGTTCTGTACAA<br/> TTCTCTTTTGCACTTAT </p>                                                                                                                                                                                                                                                                                                                                                                                                                                                                                                                                    |

| TatPInKun03      | ADV40356.1           | 9 e-16  | PF00014     | --       | Kunitz-type like        | CETGQDRKTVDRKRIFNNMASSLLLFLILTNLVIAVVSS<br>KDVCELPPERGPCKARKTMFYYSRCKCKVFTYGGCR<br>GNGNKFKTVDKCLDECAQD                                                                                                                                              | TGCGAAACGGGACAAGACAGAAAGACAGTTCGCGATAAACGTATCT<br>TCAACAACATGGCCTCATCGCTTCTGCTATTTTAACTTGACGAATC<br>TAGTAATAGCGGTAGTTTCTTCTAAAGATGCTCGGAACTTCCTCCGG<br>AAAGAGGACCTTGCAAGGCACGTAAGACAATGTTTTATTACAACCTCT<br>AGATGCAAATGTTGCAAAAGTCTTCACTTATGGAGGATGCAGAGGAA<br>ATGGCAATAAAATTCAAAACGGTTGATAAGTGCTTAGATGAATGTGCA<br>CAAGATTAG                                                                                                                                                                                                                                                                                                                                                                                                                                |
|------------------|----------------------|---------|-------------|----------|-------------------------|-----------------------------------------------------------------------------------------------------------------------------------------------------------------------------------------------------------------------------------------------------|------------------------------------------------------------------------------------------------------------------------------------------------------------------------------------------------------------------------------------------------------------------------------------------------------------------------------------------------------------------------------------------------------------------------------------------------------------------------------------------------------------------------------------------------------------------------------------------------------------------------------------------------------------------------------------------------------------------------------------------------------------|
| TatPInKun04      | KFM77843.1           | 2 e-58  | PF00014     | --       | Kunitz-type like        | TSLLPIDRSFEDSLRFLVILRGMPSLNGGCGVTAWSOWS<br>PCNATCEMTMGMLRLTRLFLNPAINISSNIHTIETPCR<br>SERTDCNGAPKEICFEPKEEGPCRSYFVRWYYNVQEGR<br>CLQFVYGGCRGNRNFKSFSECHRICNNVLREPPYNMPI<br>PLSPDDPTLVIDCRLTQWAPWSECSNTCGVAWKDRRRT<br>VEINAQNGGKPCDSKLYQRKRCKSQPPCEPIY | ACATCGTTGCTGCCCATCGACCGTTCGTTTGAAGATTCTTTAAGGTTT<br>TTGGTGATTTTGAGAGGAATGCGCTTCACTGAACGGTGGATGTGGAGT<br>TACAGCATGGTCAGATTGGTCACCATGCAACGCAACATGCGAAATGA<br>CAATGGGAATGAGATTGAGGACACGTTTATCTTGAACCCCCGAATA<br>AATATTAGCAGCTGCAACATCCATACTATTGAAACTGAACCATGTGCG<br>TTCTGAAAGAACAGATTGCAATGGAGCTCCTAAAGAAATATGTTTCG<br>AACCAAAAAGAAGAGGTCTTGCCGTAGTTACTTTGTGCGCTGGTAC<br>TATAACGTTCAAGAAGGAAGATGTCTACAGTTTGTATTATGGTGGATG<br>CCGTGGAAATAGAAAATAACTTCAAAAGTTTTTCCGAATGTCATAGGA<br>TATGTAACAATGTTCTGAGAGAGCTCCATACACATGCCAATCCCT<br>TTGTCTCCTGATGATCCAACTCTAGTTATTGACTGTAGATTAACGCAG<br>TGGGCTCCATGGTCAGAATGTTCTAATACCTGGCGTTGCGTGGAA<br>GGACAGAAGACGCACAGTTGAAATAAATGCACAGATGGTGGAAAA<br>CCATGCGATAGTAAATTATACCAAGAAAAAGATGTAAAAGTCAAC<br>CACCTTGTGAACCAATCTAT |
| TatPInKun05      | XP_013169137.1       | 3 e-22  | PF00014     | --       | Kunitz-type like        | IKVQKRSSVIFIKRSEGLLVIMFGSWLACSITIMIMLFNNV<br>VYSWDDCDLIPSSDCGKRTQMYYYDMRSDTCKEFTDF<br>GCPGNKNKFKDKERICIKTCGNDCSLFPDSGVCFEDHRL<br>YYNYPETNCKIFSYGGCGGNRNKFVTEAECLKTCERT<br>WMNDNKE                                                                   | ATCAAAGTACAAAAACGAAGTCTGTGCTATTTTCATTAAACGGAGTGA<br>GGGATTGTTAGTCATAATGTTTGGATCATGGCTCGCATGTTTCGATTAC<br>AATAATGATAATGTTATTCAACAATGTTGTTTATCTCGGATGATTG<br>TGACCTGATACCAAGCTCAGAAGACTGCGGAAAACGCACACAGATG<br>TACTACTATGATATGCGATCCGACACCTGTAAGAGTTTACCGACTT<br>TGGATGTCCAGGGAATAAAAAATAAATTTAAAGATAAAGAAAGGTGT<br>ATCAAGACTTGTGGAATGACTGCACTTATTTCGGATTTCTGGATG<br>ATGCTTTGAAGATCATCGATTATATTACTACAATCCAGAAACCAACA<br>AGTGTAAGATATTCTCATATGGTGGATGTGGAGGAAACAGAAACAA<br>GTTCTGCTCAAGCTGAATGCGCTTAAACATGCGAAAGAAGACTTGGAA<br>TGAACGACAACAAAGAA                                                                                                                                                                                                              |
| Venom components |                      |         |             |          |                         |                                                                                                                                                                                                                                                     |                                                                                                                                                                                                                                                                                                                                                                                                                                                                                                                                                                                                                                                                                                                                                            |
| ID               | ID/Reference protein | e-value | PFAM domain | MW (Da)  | Sub-classification      | Amino acid sequence                                                                                                                                                                                                                                 | Nucleotide sequence                                                                                                                                                                                                                                                                                                                                                                                                                                                                                                                                                                                                                                                                                                                                        |
| TatVeCOth01      | ABR21061.1           | 3 e-29  | PF15430     | 12495.38 | Venom protein-7         | MAWKLLFLFVLPCIVFGTDEPARFIAYKNDVVSPLTAG<br><b>KCKIGEDKMIEQGETWYREDFCEKVYCLRTGNLGH</b><br><b>MEVRGCTPIAPTNPCTVVYHKGLYPDCCSGDIVCN</b><br><b>QPPPEPKSDVEMAELFRSLQLQNKKK</b>                                                                             | ATGGCGTGGAAATTACTGTTCTGTTTGTGTTTACCTTGATCGTTTTTG<br>GAACCGATGAACCTGCGAGATTTCATTGCATATAAAAAATGATGTAGTT<br>TCTCCACTGACAGCAGGAAAAATGCAAAATGGTGAAGATAAAATGA<br>TTGAACAGGGTGAGACTTGGTACAGAGAGGACTTCTGCGAAAAAGT<br>ATACTGTCTCCGTACTGGAATCTGGGCCATATGGAAGTAAGAGGAT<br>GTACTCTATTGCGCCCACTAACCCCTAATTGCACTGTCGTCTACCATA<br>AGGGGCTATATCTCTGACTGCTGTAGCGGTGATATCGTTTGTAAATCAA<br>CTCTCTCTGAGCCAAAATCAGATGTGGAAATGGCCGAGCTGTTTAG<br>ATCCCTACTACAAAATAAGAAGAAATGA                                                                                                                                                                                                                                                                                                     |
| TatVeCOth02      | AOF40196.1           | 2 e-8   | PF15430     | --       | Venom peptide<br>HtfTx2 | MENNKGRKCSYASELKENDEIWYNPNFCEQLTCQIEGD<br>KAYIVIIDCGVPAVPHRSCTVSVGKGNYPDCCPKINCNEI<br>MNTAE                                                                                                                                                         | ATGGAGAATAACAAAGGAAGAAAATGTTCTACGCATCAGAATTGA<br>AAGAGAATGATGAGATATGGTATAATCCTAATTTCTGCGAGCAACTG<br>ACTTGTCAAATAGAGGGGGATAAAGCCTACATTGTCATAATTGATTG<br>CGGAGTACCAGCAGTGCACATCGAAGCTGCACAGTATCTGTAGGA<br>AAAGGAAATTATCCAGATTGTTGCCCAAAAAATAAACTGTAACGAAAT<br>TATGAATACAGCAGAATAA                                                                                                                                                                                                                                                                                                                                                                                                                                                                            |
| TatVeCOth03      | API81329.1           | 4 e-32  | PF15430     | 8721.03  | Toxin protein           | MKSTAVVFFSLYAAATYLIFSQARQEICMAGEELTLYLG<br><b>EKQDPNACALYKCERYFSRVLHTLTCAPQELSSGC</b><br><b>RNVDPIDAPFPDCCPMVVCNAPVFG</b>                                                                                                                           | ATGAAATCGACCGCTGTGGTATTTTTCAGCCTGTATGCCGCTACCTAC<br>CTCATCTTTTCCCAAGCTCGGCAAGAAAATTTGCATGGCTGGGAGGA<br>GTTGACCCTATATCTCGGCGAAGAAAAACAAGATCCTAACGCATGCG<br>CATTTGTATAAATGCGAAAGATATTTTCGAGGATCGTTCTTCATACAC<br>TGACCTGCGCACCTCAGGAATCAGTAGTGGATGCCGAAATGTTGAT<br>GGACCAATTGACGCTCCTTTTCCAGATTGCTGTCCAATGGTAGTATGC<br>AACGCCCTGTGTTTGGA                                                                                                                                                                                                                                                                                                                                                                                                                      |



|             |            |        |         |         |                         |                                                                                                                                    |                                                                                                                                                                                                                                                                                                                                                                                      |
|-------------|------------|--------|---------|---------|-------------------------|------------------------------------------------------------------------------------------------------------------------------------|--------------------------------------------------------------------------------------------------------------------------------------------------------------------------------------------------------------------------------------------------------------------------------------------------------------------------------------------------------------------------------------|
| TatVeC0th04 | AOF40196.1 | 3 e-9  | PF15430 | 9766.03 | Venom peptide<br>HtfTx2 | MMLLCCLITAFALTFSASGYVFNSTVSLIDGKCSYASEL<br><b>KENDEIWYNPNFCEQLTCQIEGDKAYIVIIDCGVPAV</b><br><b>PHRSCTVSVGKGKNYPDCCPKINCNEIMNTAE</b> | ATGATGCTCTTGTGCTGTCTAATAACCGCATTTCCTTGACGTTTTCA<br>GCGAGTGGCTACGTTTTTAAATAGTACAGTTTCATTAATAGATGGAAA<br>ATGTTCCCTACGCATCAGAAATTGAAAGAGAATGATGAGATATGGTATA<br>ATCCTAATTTCTGCGAGCAACTGACTTGTCAAATAGAGGGGGATAAA<br>GCCTACATTGTCATAATTGATTGCGGAGTACCAGCAGTGCCACATCG<br>AAGCTGCACAGTATCTGTAGGAAAAGGAAATTATCCAGATTGTGGC<br>CAAAAATAAACTGTAACGAAATTATGAATACAGCAGAA                           |
| TatVeC0th05 | C5J895.1   | 1 e-28 | PF15430 | --      | Venom toxin<br>OcyC11   | MKATCFLLISLVVFTYANAAMIPKGFCTRTRTGELLRD<br><b>GQEWKDPHQCAIYKCSIYDGESELNGMICAVFQVPP</b><br><b>NCREVPGRGRLYPECCPTVVC</b>              | ATGAAAGCAACGTGTTTCCTTTTAAATATCCTTGGTGGTCTTTTATACT<br>GCAAAATGCAGCTATGATCCCGAAAAGGATTCTGCAGAACAAGAACAG<br>GAGAACITTTTACGAGATGGTCAAGAATGGAAGGACCCCATCAATGT<br>GCTATATATAAATGCAGTATTTACGATGGTGAAATCTGAACCTTAATGG<br>CATGATATGCGCAGTATTTTCAGGTCCCGCCTAATTGCAGAGAAGTTC<br>CAGGTAGAGGAAGGCTTTATCCAGAATGCTGCCCCACCGTAGTGTGC                                                                 |
| TatVeC0th06 | CAX51433.1 | 1 e-19 | N/D     | 6768.55 | Venom<br>component      | MWKIVFVCFAVLVSTICKGDESMEEGR TINLLFSE DGR<br><b>RTLGCWFTYAFSYNPTADIPTKTEGQKKLCECMQKA</b><br><b>LSGSN</b>                            | ATGTGGAAGATTGTCTTTTGTGTTTCGCAGTTTGTAGTATCTACTATTT<br>GCAAAGGAGATGAGAGTATGGAAGAAGGAAGAACAATTAATCTCTT<br>GTTTTCCGGAAGATGGTAGAAGGACATTAGGGTGTGGTTCACTTACG<br>CCTTTTCTATAATCCCACTGCTGATATTCCTACAAAGACAGAGGGCC<br>AGAAAAAGCTGTGTGAGTGTATGCAAAAAGGCACTATCTGGAAGTAA<br>TTGA                                                                                                                 |
| TatVeC0th07 | JAV47658.1 | 2 e-46 | N/D     | --      | Venom protein           | LLMMYALYLLLLFGFMHVAIHKTESFPYHAAKVGRDC<br>DFKIFPPLKCNEQCWREGYNWGTVCVGLLEGLCWHQKC<br>CCFTKPIQELEIDDDPYVDMTIQVEDPNVKTNPDERICQ         | TTGCTGATGATGTATGCTCTTTATTTGCTGCTTTTATTGGATTTCATGC<br>ATGTGGCGATCATAAAAAACAAAGGAATCATTCCATATCATGCAGCA<br>AAAGTTGGAAGGGACTGTGACTTTAAAAATCTTCCCTCCCCTGAAATG<br>CAATGAACAATGTTGGCGCGAAGGGTACAATTGGGGTACTTGTGTTG<br>GTTTATTAGAAGGTCTATGTTGGCATCAAAAGTGTTGTTGCTTCACTA<br>AGCCAATACAGGAATTAGAAATCGATGACGATCCATACGTGGACAT<br>GACAATACAAGTTGAGGATCCCAATGTAAAGACAAATCCAGACGAA<br>AGAATTTGCCAA  |
| TatVeC0th08 | JAV47706.1 | 6 e-23 | N/D     | --      | Venom protein           | MYALRIAVLSLLVYGVICELKMLTASRRYCAKTC DKKS<br>ARHCAEDIMPGFLGLYVKCVQSIRPEANTWDEINDVYC<br>SQVSQEEFLHQVMCFNLELNTRFKDGNHGDVCLKCLDE<br>AGC | ATGTACGCTTTACGAATAGCTGTCTGTCTACTGGTATATGGCGTT<br>ATTTGCGAGCTAAAAATGCTGACTGCTTCACGTAGATATTGTGCAAA<br>AACCTGTGACAAGAAAAGTGCTCGACATTGTGCAGAAGACATTATGC<br>CAGGGTTTTAGGTTTATACGTGAAATGTGTTCAGTCCATACGACCA<br>GAAGCAAACACATGGGACGAAATCAATGATGTTTATTGTAGCCAGGT<br>CTCCCAAGAAGATTTTTCATCAGGTAATGTGTTTCAATCTTGAGCT<br>GAATACAAGATTCAAAGATGGCAACCATGGTGACGTGTGCTTGAAAT<br>GCTTGATGAAGCTGGTTGT |
