# Supplementary material for: A Deeper Examination of Thorellius atrox Scorpion Venom Components with Omic Techonologies
Source: MDPI journal article supplement (doi:10.3390/toxins9120399), 2017-12-12
Supplement: s1 [file s1]

# Supplementary Materials: A deeper examination of Thorellius atrox scorpion venom components with omic techonologies

Teresa Romero-Gutierrez, Esteban Peguero-Sanchez, Miguel A. Cevallos, Cesar V. F. Batista, Ernesto Ortiz and Lourival D. Possani

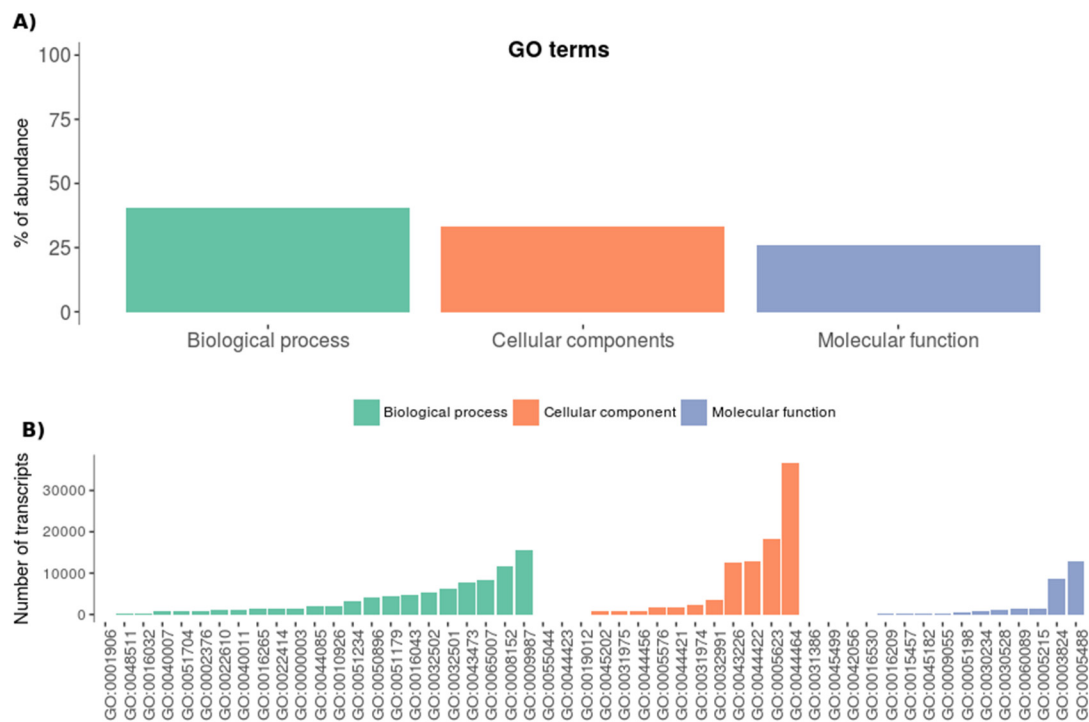

**Figure S1.** Distribution of the GO terms for the annotated *T. atrox* transcripts. **(A)** Distribution in accordance to the main three Gene Ontology (GO) ‘root’ nodes: Cellular Component, Molecular Function or Biological Process. **(B)** Assignment of the transcripts to the first level of ‘child’ terms of the GO hierarchy. The IDs of the GO terms are shown in the x-axis.

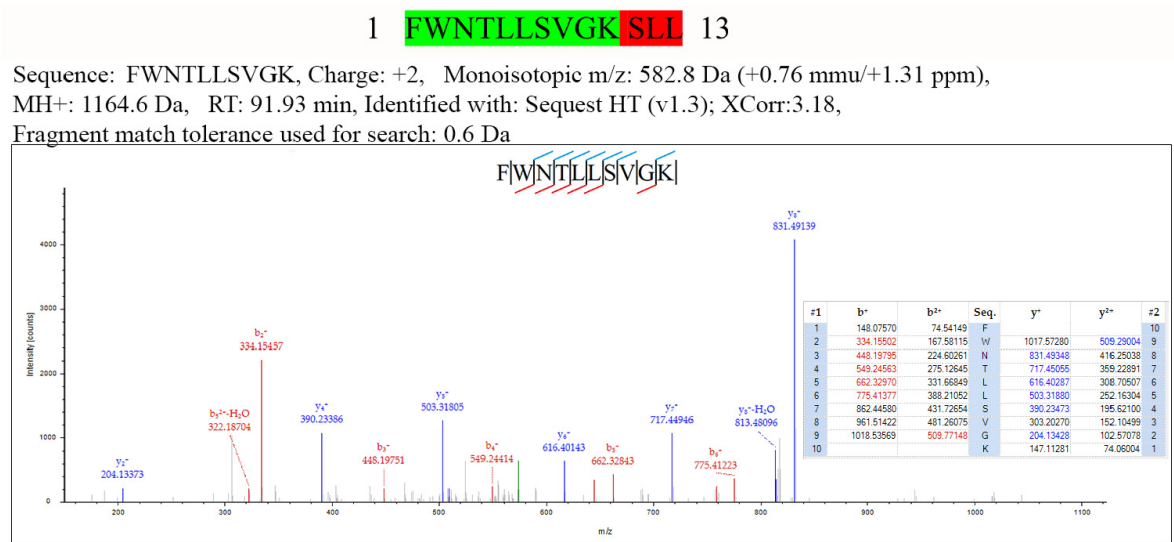

**Figure S2.** Sequence coverage and MS/MS spectrum of TatHDPND403
